# Supplementary material for: Roles and Preliminary Mechanism of Tobacco cis-Abienol in Inducing Tomato Resistance against Bacterial Wilt
Source: MDPI journal article supplement (doi:10.3390/ijms241512226), 2023-07-31
Supplement: s1 [file s1]

Tobacco extract  
 ↓  
 Dissolved in 95% ethanol  
 ↓  
 Reverse medium pressure preparation apparatus (90% Methanol: 10% H<sub>2</sub>O)

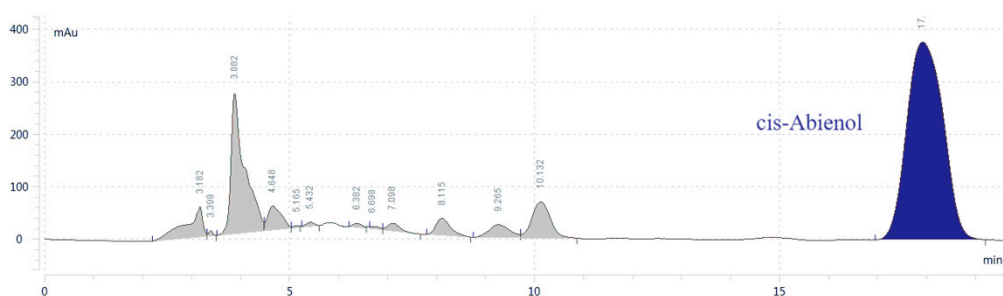

↓  
 Reverse medium pressure preparation apparatus (90% Acetonitrile: 10% H<sub>2</sub>O)  
 ↓

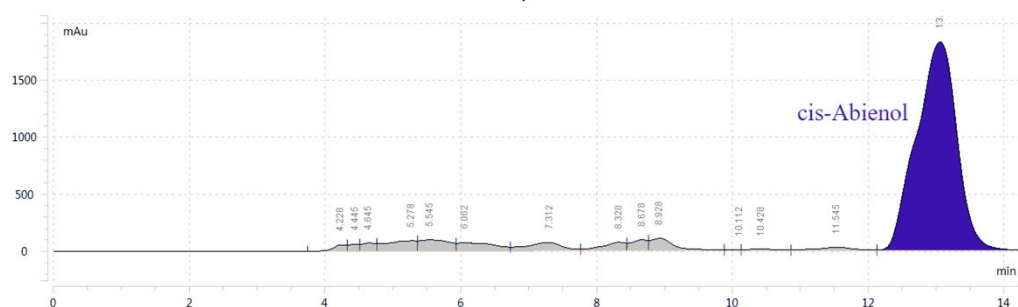

↓  
 Super High-performance liquid chromatography  
 ↓

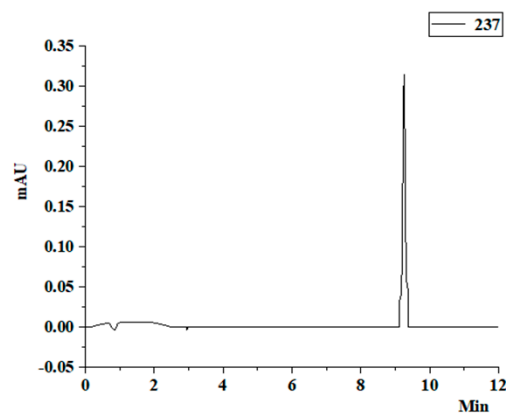

**Figure S1.** Extraction and purification of cis-abienol.
