# Supplementary material for: Roles and Preliminary Mechanism of Tobacco cis-Abienol in Inducing Tomato Resistance against Bacterial Wilt
Source: Int J Mol Sci. 2023 Jul 31;24(15):12226. doi: 10.3390/ijms241512226 (PMC10418768; doi:10.3390/ijms241512226)
Supplement: Supplementary file 1 [file ijms-24-12226-s001.zip › Table S1-S5.xlsx]

## Sheet: Table S1
Table S1. Differential DEGs induced by cis-abienol and water in tomato.
gene_id	T1	T2	T3	CK1	CK2	CK3	T	CK	log2FoldChange	pvalue	padj	gene_name	gene_chr	gene_start	gene_end	gene_strand	gene_length	gene_biotype	gene_description	tf_family
Solyc06g073165.1	723.861	755.663	555.171	92230.9	115192	170487	678.232	125970	-7.53717	2.26089e-170	5.25702e-166	-	6	45222416	45223642	+	1227	protein_coding	- && Q9XI99.1 RecName: Full=BURP domain protein USPL1; AltName: Full=Unknown seed protein-like protein 1; Short=AtUSPL1; Flags: Precursor	-
Solyc01g086680.3	6331.88	6939.1	6568.17	96.2399	134.817	111.078	6613.05	114.045	5.85773	1.47396e-166	1.71363e-162	-	1	81518596	81520179	+	672	protein_coding	- && Q03664.1 RecName: Full=Probable glutathione S-transferase; AltName: Full=Auxin-induced protein PCNT103	GST_N
Solyc02g086880.3	42472.7	44441.9	43936.2	2234.28	2239.67	2482.98	43616.9	2318.97	4.23334	1.69032e-159	1.31011e-155	-	2	50122391	50126777	+	1397	protein_coding	Formate dehydrogenase, mitochondrial [Source:UniProtKB/TrEMBL;Acc:Q5NE18] && Q07511.2 RecName: Full=Formate dehydrogenase, mitochondrial; Short=FDH; AltName: Full=NAD-dependent formate dehydrogenase; Flags: Precursor	2-Hacid_dh_C
Solyc04g058100.3	96.8777	106.646	77.7239	10460.9	10247	7338.82	93.7492	9348.91	-6.64021	4.26981e-158	2.48204e-154	-	4	55154558	55155327	+	494	protein_coding	Metallothionein-like protein type 2 [Source:UniProtKB/Swiss-Prot;Acc:Q43512] && Q43512.1 RecName: Full=Metallothionein-like protein type 2	-
Solyc05g050890.2	3117.5	3501.03	3021.14	22.6447	25.6342	22.9817	3213.22	23.7535	7.07975	3.73329e-155	1.73613e-151	-	5	61968009	61968908	+	818	protein_coding	- && P22195.2 RecName: Full=Cationic peroxidase 1; AltName: Full=PNPC1; Flags: Precursor	-
Solyc09g090900.3	6098.94	5592.31	5683.94	12.2659	32.2801	19.1514	5791.73	21.2324	8.09199	5.93658e-151	2.30062e-147	-	9	70783641	70788642	+	1922	protein_coding	3-isopropylmalate dehydratase large subunit, chloroplastic [Source:Projected from Arabidopsis thaliana (AT4G13430) UniProtKB/Swiss-Prot;Acc:Q94AR8] && Q94AR8.1 RecName: Full=3-isopropylmalate dehydratase large subunit, chloroplastic; AltName: Full=AtLEUC; AltName: Full=Isopropylmalate isomerase large subunit 1; Short=AtIIL1; Flags: Precursor	Aconitase
Solyc09g092480.2	6725.92	7253.96	7677.51	197.198	145.26	136.933	7219.13	159.797	5.49732	1.18207e-136	3.9265e-133	-	9	72036747	72046299	+	3945	protein_coding	- && F8WKW0.1 RecName: Full=Crocetin glucosyltransferase, chloroplastic; AltName: Full=UDP-glucose glucosyltransferase 1; Short=GjUGT1; AltName: Full=UDP-glycosyltransferase 75L6; Flags: Precursor	UDPGT
Solyc12g013690.2	13708.7	12941.7	13079.8	829.362	741.492	826.383	13243.4	799.079	4.05079	1.46082e-132	4.24588e-129	-	12	4532293	4535369	-	1567	protein_coding	- && Q6F6Y2.1 RecName: Full=FAD-dependent urate hydroxylase; AltName: Full=Flavoprotein urate hydroxylase	FAD_binding_3
Solyc11g007490.2	3926.27	3973.32	4146.62	126.433	97.7896	87.1389	4015.4	103.787	5.27356	6.65526e-121	1.71942e-117	-	11	1761891	1765495	-	2577	protein_coding	- && F8WKW8.1 RecName: Full=Beta-D-glucosyl crocetin beta-1,6-glucosyltransferase; AltName: Full=UDP-glucose glucosyltransferase 9; Short=GjUGT9; AltName: Full=UDP-glycosyltransferase 94E5	UDPGT
Solyc09g091000.3	22247	21186	21448.8	373.637	466.162	639.657	21627.3	493.152	5.45476	9.98933e-118	2.32272e-114	-	9	70835820	70836676	+	550	protein_coding	- && P17642.1 RecName: Full=Pathogenesis-related protein STH-2	-
Solyc07g056420.3	20889.7	21100.7	20739.2	1779.5	1685.21	1537.86	20909.8	1667.52	3.64839	2.75554e-112	5.8247e-109	-	7	64408624	64431052	+	4267	protein_coding	- && Q03666.1 RecName: Full=Probable glutathione S-transferase; AltName: Full=Auxin-induced protein PCNT107	GST_N
Solyc01g015080.3	115.382	93.4422	86.8085	6140.48	10815.7	6688.63	98.5444	7881.61	-6.32256	5.95777e-107	1.15442e-103	-	1	16711704	16715127	-	2072	protein_coding	Peroxidase [Source:UniProtKB/TrEMBL;Acc:K4AUE2] && Q42517.1 RecName: Full=Peroxidase N; AltName: Full=Neutral peroxidase; Flags: Precursor	-
Solyc11g069660.2	2395.82	2285.27	2330.71	94.3529	93.0425	100.545	2337.27	95.9801	4.60599	9.14633e-106	1.63593e-102	-	11	54566110	54588759	-	4071	protein_coding	- && Q8L817.1 RecName: Full=Alpha carbonic anhydrase 7; Short=AtaCA7; Short=AtalphaCA7; AltName: Full=Alpha carbonate dehydratase 7; Flags: Precursor	NB-ARC
Solyc06g005470.3	22.8588	76.1757	76.7145	25297.9	15397.6	29800.5	58.583	23498.7	-8.64486	1.34445e-102	2.23294e-99	-	6	482746	484337	+	651	protein_coding	- && Q43515.1 RecName: Full=Metallothionein-like protein type 2	-
Solyc06g082420.3	3299.28	3724.48	4087.07	16.04	9.49413	32.5574	3703.61	19.3638	7.58082	5.34212e-98	8.281e-95	-	6	48275775	48289250	+	2384	protein_coding	- && P22195.2 RecName: Full=Cationic peroxidase 1; AltName: Full=PNPC1; Flags: Precursor	-
Solyc01g108860.3	38.098	66.0189	14.1316	31230.8	19342.4	15816.2	39.4162	22129.8	-9.13312	1.12663e-97	1.63727e-94	-	1	95923625	95925109	-	1236	protein_coding	- && Q9C899.1 RecName: Full=Feruloyl CoA ortho-hydroxylase 2	2OG-FeII_Oxy
Solyc11g006910.2	9412.37	9059.83	8475.94	35.8541	93.9919	36.3877	8982.71	55.4112	7.34076	3.57908e-97	4.89534e-94	-	11	1430930	1432627	-	670	protein_coding	- && Q9ZQG8.1 RecName: Full=Ferredoxin-3, chloroplastic; Short=AtFd3; Flags: Precursor	Fer2
Solyc07g009435.1	28.3013	20.3135	23.2162	2830.59	3992.28	6042.27	23.9437	4288.38	-7.48698	1.25834e-96	1.62549e-93	-	7	4489600	4491997	+	490	protein_coding	- && -	-
Solyc10g050990.1	12772.6	11346.1	13268.6	1.88706	0	3.83028	12462.4	1.90578	12.6788	1.99175e-91	2.43748e-88	-	10	51240511	51240720	+	210	protein_coding	- && -	-
Solyc07g062480.1	1816.73	1445.31	1950.16	34.9106	29.4318	33.515	1737.4	32.6191	5.73501	2.92483e-91	3.40041e-88	-	7	65331937	65332830	-	894	protein_coding	- && Q39688.1 RecName: Full=Epidermis-specific secreted glycoprotein EP1; AltName: Full=52/54 kDa medium protein; Flags: Precursor	B_lectin
Solyc02g092110.3	3007.56	2906.86	2852.57	12.2659	5.69648	25.8544	2922.33	14.6056	7.64617	1.25585e-88	1.39053e-85	-	2	53960693	53961812	+	632	protein_coding	Putative phytosulfokine peptide [Source:UniProtKB/TrEMBL;Acc:Q7PCA6] && Q9M2Y0.2 RecName: Full=Phytosulfokines 3; Short=AtPSK3; Contains: RecName: Full=Phytosulfokine-alpha; Short=PSK-alpha; Short=Phytosulfokine-a; Contains: RecName: Full=Phytosulfokine-beta; Short=PSK-beta; Short=Phytosulfokine-b; Flags: Precursor	-
Solyc09g011490.3	13976.5	13183.5	14123.5	1236.97	952.262	1060.99	13761.2	1083.41	3.66694	1.27364e-87	1.34613e-84	-	9	4810139	4828392	-	2980	protein_coding	- && Q03662.1 RecName: Full=Probable glutathione S-transferase; AltName: Full=Auxin-induced protein PGNT1/PCNT110	GST_N
Solyc10g080130.2	564.938	721.13	522.87	10101.4	13334.5	12785.5	602.979	12073.8	-4.32354	8.77344e-85	8.86957e-82	-	10	61646121	61650789	+	1435	protein_coding	- && Q9D753.1 RecName: Full=Exosome complex component RRP43; AltName: Full=Exosome component 8; AltName: Full=Ribosomal RNA-processing protein 43	-
Solyc07g009100.3	9.79662	12.1881	20.188	2052.17	1676.66	1515.83	14.0576	1748.22	-6.95191	2.26048e-84	2.19003e-81	-	7	4044488	4045195	-	544	protein_coding	- && -	-
Solyc03g116700.3	15326.3	18006.9	16679.3	423.644	384.512	198.217	16670.8	335.458	5.63494	3.3682e-84	3.13269e-81	-	3	67477035	67477829	+	694	protein_coding	- && P29602.3 RecName: Full=Cucumber peeling cupredoxin; Short=CPC; AltName: Full=Stellacyanin	Cu_bind_like
Solyc08g080570.3	618.275	589.092	764.117	13738.7	11697.7	17509.2	657.161	14315.2	-4.44506	9.11554e-83	8.1521e-80	-	8	63950139	63953756	-	2072	protein_coding	- && Q42605.2 RecName: Full=Bifunctional UDP-glucose 4-epimerase and UDP-xylose 4-epimerase 1; AltName: Full=UDP-D-xylose 4-epimerase; AltName: Full=UDP-L-arabinose 4-epimerase; AltName: Full=UDP-galactose 4-epimerase 1; AltName: Full=UDP-glucose 4-epimerase 1; Short=AtUGE1	-
Solyc05g047530.3	1964.77	1676.88	1773.52	76.4258	70.2566	85.2237	1805.05	77.302	4.54546	4.01134e-82	3.45451e-79	-	5	59862879	59865952	-	2984	protein_coding	- && H2DH22.1 RecName: Full=Cytochrome P450 CYP73A100 [Panax ginseng]	p450
Solyc06g075660.3	52.2486	55.8622	40.3761	2315.42	2236.82	3598.55	49.4956	2716.93	-5.77918	8.8247e-81	7.32829e-78	-	6	47160989	47162126	-	712	protein_coding	- && Q9LX82.1 RecName: Full=Transcription factor MYB48; AltName: Full=Myb-related protein 48; Short=AtMYB48	Myb_DNA-binding
Solyc07g008240.3	45928.7	47655.5	46593	808.604	866.814	1631.7	46725.7	1102.37	5.40557	5.6019e-79	4.49156e-76	-	7	2965816	2968253	-	982	protein_coding	Non-symbiotic hemoglobin class 1 [Source:UniProtKB/TrEMBL;Acc:Q9AWA9] && Q947C5.1 RecName: Full=Non-symbiotic hemoglobin 1; AltName: Full=GOShi GLB1; Short=Hb1	-
Solyc07g054780.1	10889.5	10723.5	12110.8	266.075	376.917	505.597	11241.3	382.863	4.87594	5.56707e-78	4.31485e-75	-	7	63110918	63111169	-	252	protein_coding	- && -	-
Solyc02g080510.1	5972.67	6552.12	5525.46	568.004	600.029	600.396	6016.75	589.477	3.35149	7.12465e-78	5.34394e-75	-	2	45272134	45272754	-	621	protein_coding	- && -	-
Solyc11g011330.2	24389.2	26061.2	25883.1	3440.11	3441.62	3600.46	25444.5	3494.06	2.86438	1.16852e-77	8.49073e-75	-	11	4375553	4377836	+	1202	protein_coding	- && Q6V4H0.1 RecName: Full=8-hydroxygeraniol dehydrogenase; Short=Cr10HGO	ADH_N
Solyc06g081980.1	13153.6	13133.7	12735.6	308.534	436.73	601.354	13007.6	448.873	4.857	2.35936e-76	1.66242e-73	-	6	47994028	47994957	+	930	protein_coding	- && Q39963.1 RecName: Full=Probable pyridoxal 5'-phosphate synthase subunit PDX1; Short=PLP synthase subunit PDX1; AltName: Full=Ethylene-inducible protein HEVER	-
Solyc09g075420.3	23139.6	22803.9	21587.1	862.385	1276.01	1410.5	22510.2	1182.97	4.25013	2.90177e-76	1.98447e-73	-	9	67552798	67553701	+	830	protein_coding	Ethylene responsive factor 2 [Source:UniProtKB/TrEMBL;Acc:Q6RJ36] && O22259.1 RecName: Full=Ethylene-responsive transcription factor ERF071	AP2
Solyc02g078380.3	21420.8	21534.4	22330	1449.26	1785.85	2044.41	21761.7	1759.84	3.6283	3.00553e-76	1.9967e-73	-	2	43652165	43653626	-	1016	protein_coding	- && P24805.1 RecName: Full=Stem-specific protein TSJT1	-
Solyc10g012370.3	16334.2	16290.4	16736.9	1139.78	1538.05	1113.65	16453.8	1263.83	3.70255	1.95229e-75	1.26097e-72	-	10	4997229	5005608	-	1421	protein_coding	Cysteine synthase [Source:UniProtKB/TrEMBL;Acc:K4CYL4] && Q76MX2.1 RecName: Full=Bifunctional L-3-cyanoalanine synthase/cysteine synthase 1, mitochondrial; Flags: Precursor	PALP
Solyc11g069750.2	13.0622	24.3762	31.2914	22086.1	4512.56	15147.8	22.9099	13915.5	-9.24311	6.99349e-75	4.39493e-72	-	11	54641006	54653069	+	2481	protein_coding	- && Q9FJH8.1 RecName: Full=High affinity nitrate transporter 2.4; Short=AtNRT2:4	MFS_1
Solyc03g122190.3	2046.4	2054.71	2311.53	105.675	70.2566	95.757	2137.55	90.5629	4.56086	1.19932e-74	7.33857e-72	-	3	71585569	71589220	-	2714	protein_coding	Salt responsive protein 1 [Source:UniProtKB/TrEMBL;Acc:B6D1Q5] && Q8H395.1 RecName: Full=Protein TIFY 10b; Short=OsTIFY10b; AltName: Full=Jasmonate ZIM domain-containing protein 7; Short=OsJAZ7; AltName: Full=OsJAZ6	Zim
Solyc05g050870.3	3609.51	3732.61	4105.24	161.343	212.669	125.442	3815.78	166.485	4.51842	1.98873e-72	1.18569e-69	-	5	61929291	61942135	-	1548	protein_coding	- && P22195.2 RecName: Full=Cationic peroxidase 1; AltName: Full=PNPC1; Flags: Precursor	-
Solyc05g053860.3	1033	1152.79	1154.76	39.6282	42.7236	43.0907	1113.52	41.8142	4.73515	6.93925e-70	4.03378e-67	-	5	64744283	64746504	+	1699	protein_coding	- && Q9SA38.1 RecName: Full=Organic cation/carnitine transporter 3; Short=AtOCT3	Sugar_tr
Solyc07g053900.2	30.4784	27.4232	12.1128	3381.61	1855.15	3848.47	23.3381	3028.41	-7.02354	1.47833e-69	8.38393e-67	-	7	62431546	62432899	-	1256	protein_coding	- && -	-
Solyc10g005500.3	176.339	177.743	228.125	3191.01	2982.11	2658.21	194.069	2943.78	-3.92254	4.45878e-69	2.46847e-66	-	10	410191	412910	-	1941	protein_coding	- && Q0WU02.1 RecName: Full=Metal tolerance protein 10; Short=AtMTP10	-
Solyc03g115880.1	2257.58	2278.16	2535.62	124.546	161.4	165.66	2357.12	150.535	3.96902	1.09053e-68	5.89695e-66	-	3	66963079	66963300	+	222	protein_coding	- && -	-
Solyc01g107100.3	8958.46	9241.63	9864.88	1150.16	947.514	924.055	9354.99	1007.24	3.2153	1.25594e-67	6.58506e-65	-	1	94627063	94627719	+	657	protein_coding	- && -	-
Solyc04g081890.1	72.9304	47.7368	94.8837	2266.36	2801.72	3182.96	71.8503	2750.35	-5.25838	1.27442e-67	6.58506e-65	-	4	65839842	65840246	+	405	protein_coding	- && Q8L9W3.2 RecName: Full=E3 ubiquitin-protein ligase ATL23; AltName: Full=RING-H2 finger protein ATL23; AltName: Full=RING-type E3 ubiquitin transferase ATL23	-
Solyc08g007790.3	11557.8	11429.4	11584.9	1542.67	1749.77	1563.71	11524	1618.72	2.83172	4.91401e-67	2.48393e-64	-	8	2294232	2299405	-	2004	protein_coding	3-hydroxy-3-methylglutaryl coenzyme A synthase [Source:UniProtKB/TrEMBL;Acc:A9LRT6] && P54873.2 RecName: Full=Hydroxymethylglutaryl-CoA synthase; Short=HMG-CoA synthase; AltName: Full=3-hydroxy-3-methylglutaryl coenzyme A synthase; AltName: Full=Protein EMBRYO DEFECTIVE 2778; AltName: Full=Protein FLAKY POLLEN 1	-
Solyc06g060760.3	597.594	554.559	649.045	16007.9	11363.5	9160.12	600.399	12177.2	-4.3421	1.30894e-66	6.47562e-64	-	6	38907903	38909201	+	978	protein_coding	Tonoplast intrinsic protein 23 [Source:UniProtKB/TrEMBL;Acc:K4C6Q6] && P21653.1 RecName: Full=Probable aquaporin TIP-type RB7-5A; AltName: Full=RT-TIP; AltName: Full=TobRB7; AltName: Full=Tonoplast intrinsic protein, root-specific RB7-5A	-
Solyc06g059740.3	93389	90280.4	88326.7	14038.8	12529.4	11727.4	90665.3	12765.2	2.82833	2.03606e-66	9.86301e-64	-	6	37722996	37725472	+	1783	protein_coding	- && P28032.2 RecName: Full=Alcohol dehydrogenase 2	ADH_zinc_N
Solyc07g009090.3	38.098	43.6741	21.1974	3832.61	2503.6	1921.84	34.3231	2752.69	-6.32682	3.30179e-66	1.5668e-63	-	7	4040469	4041464	-	828	protein_coding	- && -	-
Solyc08g068710.1	2648.35	2892.64	3357.27	216.068	156.653	169.49	2966.09	180.737	4.03653	4.03612e-66	1.87696e-63	-	8	57905614	57906318	-	705	protein_coding	- && Q9SMB8.1 RecName: Full=Tyramine N-feruloyltransferase 4/11; AltName: Full=Hydroxycinnamoyl-CoA: tyramine N-hydroxycinnamoyltransferase	Acetyltransf_1
Solyc10g084410.2	4326.84	4552.26	5022.78	240.6	357.929	338.022	4633.96	312.184	3.89187	6.91202e-65	3.15134e-62	-	10	64081078	64087970	-	2993	protein_coding	- && Q9LHJ9.1 RecName: Full=Probable protein phosphatase 2C 38; Short=AtPP2C38	PP2C
Solyc07g065970.2	3282.96	3388.29	3366.35	351.936	403.501	383.986	3345.87	379.807	3.13907	8.42356e-65	3.76663e-62	-	7	67666737	67669812	-	828	protein_coding	- && Q9FYB5.2 RecName: Full=Chaperone protein dnaJ 11, chloroplastic; Short=AtDjC11; Short=AtJ11; Flags: Precursor	DnaJ
Solyc12g044330.2	154.569	94.4578	153.429	5740.43	10048.6	4833.81	134.152	6874.28	-5.6797	1.18743e-64	5.20947e-62	-	12	60201772	60203397	+	1138	protein_coding	- && Q41951.2 RecName: Full=Aquaporin TIP2-1; AltName: Full=Delta-tonoplast intrinsic protein; Short=Delta-TIP; AltName: Full=Tonoplast intrinsic protein 2-1; Short=AtTIP2;1; Contains: RecName: Full=Aquaporin TIP2-1, N-terminally processed	-
Solyc09g090360.3	406.015	348.377	265.473	5630.04	5123.03	4565.69	339.955	5106.25	-3.90939	5.30431e-63	2.28399e-60	-	9	70337479	70350032	-	4791	protein_coding	- && Q8S403.1 RecName: Full=Phosphate transporter PHO1; AltName: Full=Protein PHO1; Short=AtPHO1	-
Solyc01g103590.3	278.659	299.624	219.04	6735.85	4145.14	6475.09	265.775	5785.36	-4.44429	5.71937e-63	2.41794e-60	-	1	92047496	92048349	+	686	protein_coding	- && -	-
Solyc10g050880.1	1646.92	1556.02	1877.49	4.71764	0	3.83028	1693.47	2.84931	9.21469	8.3626e-63	3.47227e-60	-	10	51041384	51042322	+	939	protein_coding	- && Q5NUF4.1 RecName: Full=2-hydroxyisoflavanone dehydratase; AltName: Full=Carboxylesterase HIDM	Abhydrolase_3
Solyc12g009880.1	6558.29	6580.56	6810.43	953.908	902.892	1013.11	6649.76	956.636	2.79728	1.48752e-62	6.06802e-60	-	12	3055601	3056095	-	495	protein_coding	- && -	-
Solyc03g113620.3	1295.33	1462.57	1290.01	9256.96	10041.9	10517	1349.31	9938.63	-2.88078	3.01501e-62	1.20871e-59	-	3	65173964	65176086	-	1869	protein_coding	- && Q2V9B0.1 RecName: Full=Transcription factor MYB1R1; AltName: Full=Myb-related protein R1; Short=StMYB1R-1	Myb_DNA-binding
Solyc10g012080.3	2297.85	2280.19	2608.29	233.995	250.645	236.52	2395.45	240.387	3.31689	2.93444e-61	1.15647e-58	-	10	4396499	4399512	-	1400	protein_coding	- && -	-
Solyc04g009435.1	5136.69	4700.55	4342.44	383.073	328.497	242.265	4726.56	317.945	3.89381	9.07618e-61	3.51732e-58	-	4	2854903	2862162	+	4176	protein_coding	- && Q9C598.1 RecName: Full=Protein ATAF2; AltName: Full=NAC domain-containing protein 81; Short=ANAC081	-
Solyc07g009060.3	0	8.12541	7.06581	2047.46	1907.37	1233.35	5.06374	1729.39	-8.39214	1.85437e-60	7.06848e-58	-	7	4032224	4033345	-	920	protein_coding	- && -	-
Solyc02g094270.2	3204.58	3134.38	2826.32	34.9106	15.1906	4.78785	3055.09	18.2963	7.38179	5.29682e-60	1.98648e-57	-	2	55484973	55487767	-	716	protein_coding	Probable WRKY transcription factor 45 [Source:Projected from Arabidopsis thaliana (AT3G01970) UniProtKB/Swiss-Prot;Acc:Q9S763] && Q9FYA2.1 RecName: Full=Probable WRKY transcription factor 75; AltName: Full=WRKY DNA-binding protein 75	WRKY
Solyc11g011890.2	173.074	174.696	120.119	2368.26	3134.96	2713.75	155.963	2738.99	-4.13496	6.81069e-60	2.51369e-57	-	11	4830777	4834890	-	2694	protein_coding	- && Q39263.2 RecName: Full=Zinc finger protein 4	-
Solyc09g008830.3	5049.61	4516.71	5005.62	163.23	204.124	309.295	4857.31	225.55	4.42882	7.07003e-60	2.56863e-57	-	9	2256529	2257548	+	822	protein_coding	- && -	-
Solyc09g075890.3	608.479	760.741	631.885	9618.33	7505.11	6824.6	667.035	7982.68	-3.58092	6.58435e-59	2.35537e-56	-	9	67954938	67957452	-	1017	protein_coding	- && -	-
Solyc03g112100.3	138.241	211.261	187.749	9888.18	4589.46	5867.03	179.083	6781.56	-5.24234	1.13501e-58	3.99867e-56	-	3	64104026	64105237	-	697	protein_coding	- && Q9SB67.1 RecName: Full=High-affinity nitrate transporter 3.2; Flags: Precursor	-
Solyc11g007370.2	1309.48	1278.74	1800.77	37.7411	59.813	49.7936	1463	49.1159	4.89683	2.00708e-58	6.96545e-56	-	11	1729526	1739487	+	1773	protein_coding	- && F8WKW8.1 RecName: Full=Beta-D-glucosyl crocetin beta-1,6-glucosyltransferase; AltName: Full=UDP-glucose glucosyltransferase 9; Short=GjUGT9; AltName: Full=UDP-glycosyltransferase 94E5	UDPGT
Solyc07g054770.1	1464.05	1354.91	1135.58	26.4188	43.673	48.8361	1318.18	39.6426	5.05586	2.7346e-58	9.35071e-56	-	7	63109341	63109610	-	270	protein_coding	- && -	-
Solyc01g100370.3	12684.4	11543.2	12872.9	619.898	1033.91	946.079	12366.8	866.63	3.83495	6.09218e-58	2.05298e-55	-	1	90302669	90309164	+	5791	protein_coding	- && Q40401.1 RecName: Full=Calreticulin; Flags: Precursor	-
Solyc08g074260.3	949.183	923.249	777.239	13.2094	8.54472	4.78785	883.224	8.84732	6.63931	7.5685e-58	2.51404e-55	-	8	58487469	58489320	+	1764	protein_coding	- && P93531.1 RecName: Full=Cytochrome P450 71D7 [Solanum chacoense]	p450
Solyc03g025350.3	91.4351	22.3449	36.3384	5566.82	6200.62	4263.1	50.0395	5343.51	-6.74289	1.32712e-57	4.34624e-55	-	3	2807791	2810584	+	2301	protein_coding	- && Q54GU0.1 RecName: Full=Putative transporter arsB	-
Solyc03g098490.1	40.275	62.9719	72.6769	4181.72	1911.17	2933.99	58.6413	3008.96	-5.67924	6.62453e-57	2.13935e-54	-	3	62205107	62206120	-	1014	protein_coding	- && -	-
Solyc08g074980.3	217.703	313.844	153.429	9793.83	5489.51	8734.95	228.325	8006.1	-5.1319	8.15917e-57	2.59886e-54	-	8	59227229	59231137	-	2436	protein_coding	Probable serine/threonine-protein kinase PBL15 [Source:Projected from Arabidopsis thaliana (AT1G61590) UniProtKB/Swiss-Prot;Acc:Q9SY91] && Q8GXZ3.1 RecName: Full=Serine/threonine-protein kinase At5g01020	Pkinase_Tyr
Solyc03g033410.3	2026.81	1926.74	1846.2	7.54823	35.1283	24.8968	1933.25	22.5244	6.42411	1.28099e-56	4.02506e-54	-	3	5002375	5004272	-	402	protein_coding	- && Q94F47.1 RecName: Full=Ubiquitin-conjugating enzyme E2 28; AltName: Full=E2 ubiquitin-conjugating enzyme 28; AltName: Full=Ubiquitin carrier protein 28	UQ_con
Solyc06g066770.1	2321.8	2613.33	2168.19	230.221	229.758	257.586	2367.78	239.188	3.30737	1.78226e-56	5.52549e-54	-	6	42066084	42067187	-	1104	protein_coding	- && Q9M8L2.1 RecName: Full=F-box/kelch-repeat protein At1g80440	Kelch_1
Solyc09g097780.3	17335.7	14903	17187.1	532.15	1007.33	977.679	16475.2	839.052	4.29543	4.12931e-56	1.26335e-53	-	9	72290467	72295832	+	848	protein_coding	- && P23137.1 RecName: Full=Glycine-rich protein; Flags: Precursor [Nicotiana tabacum]	-
Solyc10g018340.1	2499.23	1969.4	2359.98	129.263	178.49	122.569	2276.2	143.441	3.98803	1.00175e-55	3.02503e-53	-	10	7429968	7430384	-	417	protein_coding	- && O22150.1 RecName: Full=Auxin-responsive protein SAUR36; AltName: Full=Protein RESPONSE TO AUXINS AND GIBBERELLINS 1; AltName: Full=Protein SENESCENCE-ASSOCIATED GENE 201; AltName: Full=Protein SMALL AUXIN UP RNA 36	Auxin_inducible
Solyc06g008620.1	7225.55	8071.57	7128.39	276.454	99.6884	213.538	7475.17	196.56	5.24902	3.7454e-55	1.11651e-52	-	6	2516156	2518138	-	1983	protein_coding	- && -	PD40
Solyc04g081810.3	32.6554	32.5016	47.4419	1095.44	1268.42	933.631	37.533	1099.16	-4.87042	9.55776e-55	2.81313e-52	-	4	65788708	65792910	-	2571	protein_coding	- && Q9LNU1.1 RecName: Full=CO(2)-response secreted protease; AltName: Full=Subtilisin-like serine protease; Short=AtSBT5.2; AltName: Full=Tripeptidyl-peptidase II; Flags: Precursor	Peptidase_S8
Solyc04g071085.1	105259	108004	101230	8610.64	8798.21	5146.94	104831	7518.6	3.80145	1.18824e-54	3.42112e-52	-	4	58101640	58102845	+	474	protein_coding	- && -	-
Solyc03g044097.1	9811.86	9382.81	9262.27	317.969	619.967	327.489	9485.65	421.808	4.49108	1.19177e-54	3.42112e-52	-	3	8111399	8114534	-	1581	protein_coding	- && Q9SZE7.1 RecName: Full=Peroxidase 51; Short=Atperox P51; AltName: Full=ATP37; Flags: Precursor	-
Solyc04g080130.3	1174.51	1109.12	924.612	27.3623	46.5213	35.4301	1069.41	36.4379	4.87537	1.71459e-54	4.86192e-52	-	4	64470793	64473987	-	2238	protein_coding	- && Q9SCQ6.1 RecName: Full=Protein indeterminate-domain 2	-
Solyc03g096420.1	556.23	493.618	594.537	5682.87	4643.58	4502.49	548.129	4942.98	-3.17282	2.16404e-54	6.06243e-52	-	3	59948847	59949062	+	216	protein_coding	- && -	-
Solyc02g071070.3	23.9473	19.2978	22.2068	11650.7	2270.05	3791.02	21.8173	5903.92	-8.08076	3.05538e-54	8.45758e-52	-	2	41132179	41136306	+	2998	protein_coding	- && Q9SUQ7.1 RecName: Full=Cation/H(+) antiporter 17; AltName: Full=Protein CATION/H+ EXCHANGER 17; Short=AtCHX17	Na_H_Exchanger
Solyc05g046020.3	38.098	35.5486	18.1692	4360.05	9704.9	2331.68	30.6053	5465.54	-7.48216	5.97864e-54	1.63547e-51	-	5	58955167	58956729	+	1289	protein_coding	Peroxidase [Source:UniProtKB/TrEMBL;Acc:K4C0T5] && O23044.1 RecName: Full=Peroxidase 3; Short=Atperox P3; AltName: Full=ATPRC; AltName: Full=RCI3A; AltName: Full=Rare cold-inducible protein; Flags: Precursor	-
Solyc11g017470.2	3581.21	3712.29	3080.69	364.202	412.995	323.659	3458.07	366.952	3.23625	8.1339e-54	2.19918e-51	-	11	8425209	8426742	-	1385	protein_coding	NAC4 domain protein [Source:UniProtKB/TrEMBL;Acc:K4D6Q0] && Q39013.2 RecName: Full=NAC domain-containing protein 2; Short=ANAC002	NAM
Solyc02g092120.3	2418.68	2763.65	2506.34	117.941	96.8402	50.7512	2562.89	88.5108	4.8554	2.23109e-53	5.9629e-51	-	2	53963296	53964278	+	900	protein_coding	Putative phytosulfokine peptide [Source:UniProtKB/TrEMBL;Acc:Q7PCA8] && Q9M2Y0.2 RecName: Full=Phytosulfokines 3; Short=AtPSK3; Contains: RecName: Full=Phytosulfokine-alpha; Short=PSK-alpha; Short=Phytosulfokine-a; Contains: RecName: Full=Phytosulfokine-beta; Short=PSK-beta; Short=Phytosulfokine-b; Flags: Precursor	-
Solyc02g078390.3	4048.18	3834.18	3231.09	467.99	412.045	417.501	3704.48	432.512	3.0984	2.41444e-53	6.3796e-51	-	2	43654388	43665978	-	4135	protein_coding	- && Q94AP0.1 RecName: Full=Allantoinase; Short=AtALN	Amidohydro_1
Solyc02g088180.3	37.0094	39.6114	57.5359	2064.44	1159.23	1583.82	44.7189	1602.5	-5.16164	2.47287e-53	6.46059e-51	-	2	50973105	50976137	+	2857	protein_coding	NAC2-domain containing protein [Source:UniProtKB/TrEMBL;Acc:K4BBX4] && Q9FLJ2.1 RecName: Full=NAC domain-containing protein 100; Short=ANAC100; Short=AtNAC5	NAM
Solyc03g005260.3	2883.47	2836.78	2745.57	339.67	397.804	372.495	2821.94	369.99	2.93114	2.83504e-53	7.32449e-51	-	3	148772	153939	-	2331	protein_coding	- && Q9LIK9.1 RecName: Full=ATP sulfurylase 1, chloroplastic; Short=AtPS1; Flags: Precursor	-
Solyc01g066720.3	7865.6	7247.86	6979	1170.92	1272.21	1218.99	7364.15	1220.71	2.59279	4.25762e-53	1.08789e-50	-	1	74686904	74689353	-	812	protein_coding	- && -	-
Solyc03g121190.3	1257.23	1359.99	1680.65	83.9741	58.8636	54.5815	1432.63	65.8064	4.44402	4.55553e-53	1.15136e-50	-	3	70853802	70854404	-	511	protein_coding	- && -	-
Solyc10g086090.2	16.3277	7.10973	31.2914	1818.18	1301.65	1828.96	18.243	1649.59	-6.49661	1.08928e-52	2.72342e-50	-	10	65169089	65170249	-	840	protein_coding	- && Q02214.1 RecName: Full=Trypsin inhibitor 1; AltName: Full=NSTI-I; AltName: Full=Trypsin inhibitor I; Flags: Precursor	-
Solyc12g011100.2	909.997	1000.44	945.809	7.54823	0	5.74542	952.082	4.43122	7.74661	1.75437e-52	4.33964e-50	-	12	3961361	3962955	+	1344	protein_coding	- && P23509.2 RecName: Full=Glucose-1-phosphate adenylyltransferase small subunit, chloroplastic/amyloplastic; AltName: Full=ADP-glucose pyrophosphorylase; AltName: Full=ADP-glucose synthase; AltName: Full=AGPase B; AltName: Full=Alpha-D-glucose-1-phosphate adenyl transferase; Flags: Precursor	-
Solyc01g079950.3	1579.43	1509.29	1559.53	84.9176	56.9648	100.545	1549.42	80.8091	4.26122	1.96603e-52	4.81201e-50	-	1	78954681	78956514	-	1457	protein_coding	- && -	-
Solyc09g075820.3	4729.59	4332.87	3901.34	322.687	259.19	168.532	4321.27	250.136	4.1105	1.13724e-50	2.75449e-48	-	9	67858733	67864623	-	1987	protein_coding	Hexose transporter [Source:UniProtKB/TrEMBL;Acc:Q9STA8] && Q94AZ2.2 RecName: Full=Sugar transport protein 13; AltName: Full=Hexose transporter 13; AltName: Full=Multicopy suppressor of snf4 deficiency protein 1	Sugar_tr
Solyc03g113130.3	2885.65	2988.12	3151.35	386.847	289.571	350.471	3008.37	342.296	3.13566	1.61173e-50	3.8635e-48	-	3	64882804	64886286	-	1341	protein_coding	- && Q8LGJ5.1 RecName: Full=Plant cysteine oxidase 2	-
Solyc05g021390.3	5399.02	5487.7	6018.05	340.614	570.597	472.082	5634.92	461.098	3.6113	1.65576e-50	3.92854e-48	-	5	27162954	27164888	+	1756	protein_coding	- && I7C6E8.1 RecName: Full=Beta-amyrin 28-oxidase; AltName: Full=Cytochrome P450 CYP716A52v2	p450
Solyc03g007770.3	313.492	376.816	294.745	4296.83	3490.04	3074.76	328.351	3620.54	-3.46281	2.20406e-50	5.17664e-48	-	3	2317035	2321125	+	2793	protein_coding	- && Q9FLV9.1 RecName: Full=S-type anion channel SLAH3; AltName: Full=SLAC1-homolog protein 3	C4dic_mal_tran
Solyc07g043250.1	2370.78	2161.36	2017.79	230.221	168.996	170.447	2183.31	189.888	3.52313	2.41774e-50	5.62173e-48	-	7	57035478	57035960	-	483	protein_coding	- && Q9LIE6.1 RecName: Full=VQ motif-containing protein 22; Short=AtVQ22	-
Solyc07g032740.3	24334.8	24583.4	24475	2342.78	2774.19	3512.37	24464.4	2876.44	3.08834	8.85775e-50	2.03921e-47	-	7	40993804	40999459	-	2218	protein_coding	- && P28734.1 RecName: Full=Aspartate aminotransferase, cytoplasmic; AltName: Full=Transaminase A	Aminotran_1_2
Solyc01g090610.3	51.1601	98.5205	129.203	14072.7	4471.74	6620.64	92.9613	8388.37	-6.49436	1.12558e-49	2.56587e-47	-	1	84149864	84151694	+	1196	protein_coding	- && Q944X7.1 RecName: Full=2-oxoglutarate-dependent dioxygenase AOP3	2OG-FeII_Oxy
Solyc10g080250.1	19.5932	26.4076	16.1504	662.357	749.087	718.178	20.7171	709.874	-5.09815	1.62198e-48	3.66158e-46	-	10	61714339	61718147	+	201	protein_coding	- && -	-
Solyc09g075710.2	6437.47	6460.71	6451.08	780.298	602.877	482.615	6449.75	621.93	3.37435	1.65271e-48	3.69507e-46	-	9	67741505	67759491	-	4722	protein_coding	- && Q5NUF4.1 RecName: Full=2-hydroxyisoflavanone dehydratase; AltName: Full=Carboxylesterase HIDM	Abhydrolase_3
Solyc08g014610.3	80.55	80.2384	20.188	5081.85	10363.8	4683.48	60.3255	6709.71	-6.79873	1.72012e-48	3.80917e-46	-	8	4829298	4840664	-	3235	protein_coding	- && Q84P53.1 RecName: Full=Gamma aminobutyrate transaminase 2; AltName: Full=Gamma-aminobutyrate transaminase isozyme 2; Short=LeGABA-TP2; Short=SlGABA-T2	Aminotran_3
novel.321	3879.46	4050.51	4276.83	20.7576	64.5601	95.757	4068.94	60.3582	6.07548	2.40591e-48	5.27757e-46	-	12	4721010	4742808	-	1274	-	- && - && -	-
Solyc06g053710.3	14251.9	15217.9	13943.9	1620.04	1376.65	956.613	14471.2	1317.77	3.45699	2.43939e-48	5.301e-46	-	6	36644373	36647976	-	3048	protein_coding	Ethylene receptor [Source:UniProtKB/TrEMBL;Acc:Q9XET8] && Q0WPQ2.2 RecName: Full=Ethylene receptor 2; Short=AtETR2; AltName: Full=Protein ETHYLENE RESPONSE 2; AltName: Full=Protein ETR2	Response_reg
Solyc10g084240.2	2162.88	2249.72	2400.36	16.04	14.2412	53.6239	2270.98	27.9684	6.34451	2.56392e-48	5.52003e-46	-	10	63987702	63990780	+	2009	protein_coding	- && Q42580.1 RecName: Full=Peroxidase 21; Short=Atperox P21; AltName: Full=ATP2a/ATP2b; AltName: Full=PRXR5; Flags: Precursor	-
Solyc03g121540.3	175.251	263.06	168.57	27387.8	6396.2	29915.4	202.294	21233.2	-6.71359	4.61515e-48	9.84508e-46	-	3	71118541	71124280	+	2937	protein_coding	Beta-galactosidase [Source:UniProtKB/TrEMBL;Acc:Q9ZP11] && P48980.1 RecName: Full=Beta-galactosidase; AltName: Full=Acid beta-galactosidase; Short=Lactase; AltName: Full=Exo-(1-->4)-beta-D-galactanase; Flags: Precursor	-
Solyc03g032080.3	37.0094	35.5486	53.4983	1017.12	1859.9	1291.76	42.0188	1389.6	-5.04628	5.13017e-48	1.08442e-45	-	3	4618658	4629283	+	1538	protein_coding	- && Q9SHL8.1 RecName: Full=Protein PIN-LIKES 5; AltName: Full=Auxin efflux carrier-like protein 5	-
Solyc01g073840.1	759.782	825.744	739.891	40.5717	27.533	28.7271	775.139	32.2773	4.58546	8.02587e-48	1.68124e-45	-	1	81068262	81069641	-	1380	protein_coding	- && -	C1_3
Solyc10g080980.2	4.35405	13.2038	16.1504	738.783	770.924	878.092	11.2361	795.933	-6.13508	1.40336e-47	2.91348e-45	-	10	62287560	62291347	+	2299	protein_coding	WAT1-related protein [Source:UniProtKB/TrEMBL;Acc:K4D2Y5] && Q9FL41.1 RecName: Full=WAT1-related protein At5g07050	DUF6
Solyc02g088240.3	57.6912	46.7211	24.2256	5560.21	2034.59	2511.71	42.8793	3368.84	-6.29793	3.24296e-47	6.67304e-45	-	2	51036940	51040775	-	2322	protein_coding	- && Q6R8G7.2 RecName: Full=Phosphate transporter PHO1 homolog 3; AltName: Full=Protein PHO1 homolog 3; Short=AtPHO1;H3	SPX
Solyc10g078220.2	2466.57	2232.46	2314.56	83.0305	131.968	53.6239	2337.86	89.541	4.7063	9.74727e-47	1.9881e-44	-	10	60205498	60208109	-	1763	protein_coding	- && O22203.1 RecName: Full=Cytochrome P450 98A3; AltName: Full=Protein REDUCED EPIDERMAL FLUORESCENCE 8; AltName: Full=p-coumaroylshikimate/quinate 3'-hydrolxylase; Short=C3'H	p450
Solyc10g086100.2	90.3466	165.555	113.053	10184.4	4717.63	3691.43	122.985	6197.84	-5.65459	2.64351e-46	5.34494e-44	-	10	65172272	65173495	-	493	protein_coding	- && Q02214.1 RecName: Full=Trypsin inhibitor 1; AltName: Full=NSTI-I; AltName: Full=Trypsin inhibitor I; Flags: Precursor	-
Solyc01g096420.3	6405.9	7044.73	6997.17	1186.96	1026.32	922.14	6815.93	1045.14	2.7052	4.18878e-46	8.39634e-44	-	1	87398321	87399421	+	777	protein_coding	- && Q8H9D2.1 RecName: Full=NAD(P)H:quinone oxidoreductase; Short=NAD(P)H:QR	FMN_red
Solyc08g077230.3	2061.64	2019.16	1900.7	74.5388	131.019	61.2845	1993.84	88.9474	4.48633	7.80407e-46	1.55094e-43	-	8	61261820	61267676	-	2261	protein_coding	APRR2-like protein [Source:UniProtKB/TrEMBL;Acc:K4CN83] && Q6LA43.2 RecName: Full=Two-component response regulator-like APRR2; AltName: Full=Pseudo-response regulator 2; AltName: Full=TOC2 protein	Response_reg
Solyc03g113890.1	7.61959	14.2195	17.1598	595.367	700.667	846.492	12.9996	714.175	-5.77241	3.7975e-45	7.483e-43	-	3	65419945	65420637	+	693	protein_coding	- && Q39264.1 RecName: Full=Zinc finger protein 5	-
Solyc08g007090.2	4076.48	4668.05	3988.14	0	0	2.87271	4244.22	0.95757	12.1247	8.57931e-45	1.67635e-42	-	8	1657305	1658587	-	677	protein_coding	- && Q850K7.2 RecName: Full=Expansin-like B1; AltName: Full=Expansin-related 1; AltName: Full=OsEXLB1; AltName: Full=OsEXPR1; AltName: Full=OsaEXPb3.1; Flags: Precursor	-
Solyc09g075140.3	0	3.04703	10.094	915.223	1131.7	844.577	4.38035	963.833	-7.75625	1.61577e-44	3.13083e-42	-	9	67362987	67367595	-	1378	protein_coding	- && Q9C942.1 RecName: Full=Caffeoylshikimate esterase; AltName: Full=Lysophospholipase 2; Short=LysoPL2	-
Solyc10g076510.2	12950	13408.9	12174.4	1411.52	1855.15	1179.73	12844.5	1482.13	3.11539	2.5085e-44	4.82046e-42	-	10	59602959	59606619	-	2318	protein_coding	- && O82647.1 RecName: Full=Pyruvate decarboxylase 1; Short=AtPDC1	TPP_enzyme_N
Solyc10g051010.2	3521.34	3550.8	3825.63	429.306	401.602	552.518	3632.59	461.142	2.97779	3.3718e-44	6.42632e-42	-	10	51281956	51298989	-	4257	protein_coding	- && H2DH21.1 RecName: Full=Cytochrome P450 CYP72A219; AltName: Full=Cytochrome P450 CYP72A129 [Panax ginseng]	p450
Solyc04g064870.3	3296.02	3267.43	3323.96	297.212	431.983	411.755	3295.8	380.317	3.11542	4.63385e-44	8.75985e-42	-	4	56043901	56045429	+	790	protein_coding	- && P16273.2 RecName: Full=Pathogen-related protein	-
Solyc01g060010.2	692.294	660.189	900.386	24.5317	33.2295	21.0665	750.956	26.2759	4.83676	4.84127e-44	9.07817e-42	-	1	69339360	69340199	-	828	protein_coding	- && P52401.1 RecName: Full=Glucan endo-1,3-beta-glucosidase, basic isoform 2; AltName: Full=(1->3)-beta-glucan endohydrolase; Short=(1->3)-beta-glucanase; AltName: Full=Beta-1,3-endoglucanase; Flags: Precursor	Glyco_hydro_17
Solyc08g077060.3	3879.46	3721.44	3875.09	82.087	118.677	221.199	3825.33	140.654	4.76564	4.96545e-44	9.23653e-42	-	8	61116131	61120772	-	1168	protein_coding	- && Q0J7V9.1 RecName: Full=Protein LSD1; AltName: Full=Protein LESION SIMULATING DISEASE 1; Short=OsLSD1; AltName: Full=Putative zinc finger LSD1	zf-LSD1
Solyc08g078310.3	882.784	687.612	817.615	48.12	49.3695	50.7512	796.004	49.4136	4.00976	1.21415e-43	2.24059e-41	-	8	62246411	62248177	+	1493	protein_coding	- && -	-
Solyc10g055800.2	137141	128336	121048	20284.9	19257.9	14075.3	128842	17872.7	2.84976	1.26435e-43	2.31486e-41	-	10	57355938	57358464	-	2376	protein_coding	- && P52405.1 RecName: Full=Endochitinase 3; Flags: Precursor	-
Solyc08g016210.3	1470.58	1458.51	1244.59	0	0	4.78785	1391.23	1.59595	9.77791	1.77605e-43	3.22631e-41	-	8	7092936	7098045	-	4002	protein_coding	- && -	-
Solyc06g061280.3	1554.4	1457.49	1332.41	11.3223	45.5718	22.0241	1448.1	26.3061	5.78286	1.93853e-43	3.49417e-41	-	6	39392307	39395193	-	1464	protein_coding	- && Q500U8.1 RecName: Full=Tetraketide alpha-pyrone reductase 1; AltName: Full=Protein DIHYDROFLAVONOL 4-REDUCTASE-LIKE 1	Epimerase
Solyc01g107810.3	17439.1	17854.6	17448.5	1981.41	1237.09	1060.03	17580.7	1426.18	3.62374	2.23157e-43	3.99141e-41	-	1	95122572	95128641	-	2856	protein_coding	- && Q9AT54.1 RecName: Full=Scopoletin glucosyltransferase; AltName: Full=Phenylpropanoid:glucosyltransferase 1	UDPGT
Solyc01g105370.3	12958.7	12385.1	12076.5	862.385	1089.93	505.597	12473.5	819.303	3.92828	2.88255e-43	5.11641e-41	-	1	93452160	93468164	-	1967	protein_coding	- && P37822.1 RecName: Full=Phospho-2-dehydro-3-deoxyheptonate aldolase 2, chloroplastic; AltName: Full=3-deoxy-D-arabino-heptulosonate 7-phosphate synthase 2; AltName: Full=DAHP synthase 2; AltName: Full=Phospho-2-keto-3-deoxyheptonate aldolase 2; Flags: Precursor	NPD
Solyc07g005440.1	6454.88	7116.84	7101.14	862.385	1183.92	981.509	6890.95	1009.27	2.77141	4.63365e-43	8.16225e-41	-	7	339060	340334	-	1275	protein_coding	Non-specific serine/threonine protein kinase [Source:UniProtKB/TrEMBL;Acc:K4CB16] && O65554.1 RecName: Full=CBL-interacting serine/threonine-protein kinase 6; AltName: Full=SNF1-related kinase 3.14; AltName: Full=SOS2-like protein kinase PKS4; AltName: Full=SOS3-interacting protein 3	Pkinase
Solyc01g106105.1	550.788	506.822	469.372	8.49176	9.49413	5.74542	508.994	7.91044	6.00685	7.95708e-43	1.39111e-40	-	1	93982411	93982781	+	300	protein_coding	- && -	-
Solyc07g026675.1	115.382	57.8935	65.6111	2669.24	2046.94	4788.81	79.629	3168.33	-5.31605	8.90563e-43	1.54533e-40	-	7	30217838	30223100	-	565	protein_coding	- && Q2V9B0.1 RecName: Full=Transcription factor MYB1R1; AltName: Full=Myb-related protein R1; Short=StMYB1R-1	Myb_DNA-binding
Solyc02g087090.3	20.6817	50.7838	29.2726	3568.43	2076.37	1250.59	33.5794	2298.46	-6.09452	1.20282e-42	2.0717e-40	-	2	50250750	50252573	+	1424	protein_coding	- && Q9SGH6.1 RecName: Full=Alpha-dioxygenase 1; Short=Alpha DOX1; AltName: Full=Fatty acid dioxygenase AlphaDOX1; AltName: Full=Pathogen-induced oxygenase; AltName: Full=Plant alpha dioxygenase 1; Flags: Precursor	An_peroxidase
Solyc02g079870.3	37.0094	29.4546	27.2538	699.155	710.161	1025.56	31.2393	811.625	-4.70151	1.53401e-42	2.62271e-40	-	2	44830130	44831945	+	1582	protein_coding	- && -	-
Solyc04g080740.1	7832.94	8145.72	8112.56	609.52	1013.97	628.166	8030.41	750.553	3.41945	1.61101e-42	2.73425e-40	-	4	64931431	64931874	+	444	protein_coding	- && Q9LZP8.1 RecName: Full=bZIP transcription factor 53; Short=AtbZIP53	bZIP_1
Solyc03g116510.1	4302.89	3569.08	3730.75	567.061	588.636	460.591	3867.57	538.763	2.84363	1.628e-42	2.74307e-40	-	3	67391192	67391473	+	282	protein_coding	- && -	-
Solyc03g005330.1	65.3108	65.0032	40.3761	1403.97	1182.02	2270.4	56.8967	1618.8	-4.83149	1.66013e-42	2.77707e-40	-	3	194234	195520	+	1287	protein_coding	Non-specific serine/threonine protein kinase [Source:UniProtKB/TrEMBL;Acc:K4BDV7] && Q9XIW0.1 RecName: Full=CBL-interacting serine/threonine-protein kinase 7; AltName: Full=SNF1-related kinase 3.10; AltName: Full=SOS2-like protein kinase PKS7; AltName: Full=Serine/threonine-protein kinase SR2; Short=AtSR2; Short=AtSRPK1	Pkinase
Solyc02g085910.3	4140.7	4404.99	4233.43	109.449	282.925	193.429	4259.71	195.268	4.44731	2.07081e-42	3.43931e-40	-	2	49328482	49329623	-	1054	protein_coding	LOB domain-containing protein 40 [Source:Projected from Arabidopsis thaliana (AT1G67100) UniProtKB/Swiss-Prot;Acc:Q9ZW96] && Q9M886.1 RecName: Full=LOB domain-containing protein 41; AltName: Full=ASYMMETRIC LEAVES 2-like protein 38; Short=AS2-like protein 38	-
Solyc08g008380.3	463.707	735.349	583.434	9164.49	6945.91	5852.67	594.163	7321.02	-3.62287	2.13749e-42	3.52489e-40	-	8	2803340	2808738	+	2797	protein_coding	- && Q9XED8.1 RecName: Full=Auxin response factor 9	Auxin_resp
Solyc06g068500.3	871.899	620.578	808.531	6495.25	5351.84	5858.41	767.002	5901.84	-2.94404	2.41338e-42	3.95182e-40	-	6	42571486	42574147	-	1679	protein_coding	- && Q9SAG8.1 RecName: Full=Chaperone protein dnaJ 8, chloroplastic; Short=AtDjC8; Short=AtJ8; Flags: Precursor	DnaJ
Solyc02g076820.3	1179.95	1164.98	1246.61	60.3858	98.739	92.8843	1197.18	84.003	3.83329	5.18467e-42	8.43035e-40	-	2	42509195	42515047	+	1033	protein_coding	- && Q9S7R3.1 RecName: Full=Protein LIGHT-DEPENDENT SHORT HYPOCOTYLS 10; AltName: Full=Protein ORGAN BOUNDARY 10	-
Solyc02g090490.3	2995.59	2676.31	2818.25	181.158	300.964	281.526	2830.05	254.549	3.47489	6.05483e-42	9.77687e-40	-	2	52653969	52656132	-	1507	protein_coding	Patatin [Source:UniProtKB/TrEMBL;Acc:K4BCJ8] && O23181.2 RecName: Full=Patatin-like protein 3; Short=AtPLP3; AltName: Full=Patatin-related phospholipase A IIbeta; Short=pPLAIIb; AltName: Full=Phospholipase A IVC; Short=AtPLAIVC	-
Solyc09g059040.3	14737.4	15326.5	14984.6	3506.15	3273.58	3042.2	15016.2	3273.98	2.19739	6.60874e-42	1.05977e-39	-	9	53281695	53285465	-	1532	protein_coding	- && Q9SV68.1 RecName: Full=Putative quinone-oxidoreductase homolog, chloroplastic	ADH_N
Solyc10g050980.1	12987	13168.2	12957.7	0	0	0	13037.7	0	16.1868	7.56162e-42	1.20427e-39	-	10	51191783	51191983	+	201	protein_coding	- && -	-
Solyc07g005210.3	4212.55	3617.84	4310.14	322.687	337.042	507.512	4046.84	389.08	3.37874	9.88505e-42	1.56359e-39	-	7	202262	203432	-	912	protein_coding	Temperature-induced lipocalin [Source:UniProtKB/TrEMBL;Acc:Q38JE1] && Q9FGT8.1 RecName: Full=Temperature-induced lipocalin-1; Short=AtTIL1	Lipocalin_2
Solyc01g094790.3	193.755	183.837	170.589	1714.39	1659.57	2367.11	182.727	1913.69	-3.38885	1.40844e-41	2.21277e-39	-	1	86071125	86074417	+	1963	protein_coding	Cysteine synthase [Source:UniProtKB/TrEMBL;Acc:K4AZL9] && Q9FS29.1 RecName: Full=Bifunctional L-3-cyanoalanine synthase/cysteine synthase 2, mitochondrial; Flags: Precursor	PALP
Solyc12g044940.2	6254.6	5451.13	5699.08	1186.02	1165.88	1113.65	5801.6	1155.18	2.3283	1.41893e-41	2.21429e-39	-	12	61228639	61230005	+	1203	protein_coding	- && Q9WYG0.1 RecName: Full=Uncharacterized oxidoreductase TM_0325	adh_short
Solyc08g060920.3	1724.2	1551.95	1563.56	192.48	222.163	225.987	1613.24	213.543	2.91738	3.03115e-41	4.69869e-39	-	8	45846503	45848017	+	1202	protein_coding	- && Q8LBH4.2 RecName: Full=SPX domain-containing protein 1; AltName: Full=Protein SPX DOMAIN GENE 1; Short=AtSPX1	SPX
Solyc06g071990.3	4450.93	4750.32	4739.14	928.432	843.079	766.056	4646.79	845.856	2.45773	3.41713e-41	5.26193e-39	-	6	44493630	44496028	+	1219	protein_coding	- && -	-
Solyc10g050890.2	5425.15	5007.28	5094.45	772.75	498.442	568.797	5175.63	613.33	3.07695	4.68017e-41	7.15943e-39	-	10	51044816	51047527	-	2258	protein_coding	- && P38500.1 RecName: Full=Ferredoxin--nitrite reductase, chloroplastic; Flags: Precursor	-
Solyc02g071560.3	89.2581	73.1286	24.2256	13865.2	3636.25	5246.53	62.2041	7582.64	-6.93092	5.42994e-41	8.25209e-39	-	2	41533833	41537474	-	3107	protein_coding	- && Q9FK76.1 RecName: Full=Subtilisin-like protease SBT5.6; AltName: Full=Subtilase subfamily 5 member 6; Short=AtSBT5.6; Flags: Precursor	Peptidase_S8
Solyc04g071070.2	16906.8	17181.2	17218.4	1453.98	2443.79	1601.06	17102.1	1832.94	3.22194	1.3108e-40	1.97914e-38	-	4	58068230	58069737	+	1224	protein_coding	- && -	-
Solyc04g072280.3	993.812	868.403	938.743	50.007	36.0777	21.0665	933.653	35.7171	4.70742	2.60869e-40	3.91337e-38	-	4	59397525	59401660	+	1852	protein_coding	Laccase [Source:UniProtKB/TrEMBL;Acc:K4BTL5] && Q9FY79.1 RecName: Full=Laccase-14; AltName: Full=Benzenediol:oxygen oxidoreductase 14; AltName: Full=Diphenol oxidase 14; AltName: Full=Urishiol oxidase 14; Flags: Precursor	-
Solyc00g174340.2	122720	123876	113906	2246.54	6953.5	5058.84	120167	4752.96	4.66008	3.48908e-40	5.20051e-38	-	SL3.00SC0001628	383	2337	-	687	protein_coding	Pathogenesis-related protein 1 && P04284.2 RecName: Full=Pathogenesis-related leaf protein 6; Short=P6; AltName: Full=Ethylene-induced protein P1; AltName: Full=P14; AltName: Full=P14A; AltName: Full=PR protein; Flags: Precursor	SCP
Solyc09g092600.3	749.985	803.399	626.838	30.1929	17.0894	33.515	726.741	26.9324	4.7542	6.41153e-40	9.4956e-38	-	9	72095828	72118325	+	7400	protein_coding	- && O65782.1 RecName: Full=Cytochrome P450 83B1; AltName: Full=Protein ALTERED TRYPTOPHAN REGULATION 4; AltName: Full=Protein RED ELONGATED 1; AltName: Full=Protein SUPERROOT 2	p450
Solyc08g074690.3	28.3013	11.1724	16.1504	1528.52	2740.96	822.553	18.5414	1697.34	-6.52137	7.08478e-40	1.04263e-37	-	8	58970631	58973965	-	2410	protein_coding	- && Q08307.1 RecName: Full=Polyphenol oxidase E, chloroplastic; Short=PPO; AltName: Full=Catechol oxidase; Flags: Precursor	-
Solyc08g079700.2	6586.59	6928.94	5872.7	960.512	1228.54	1030.35	6462.74	1073.13	2.59032	7.51373e-40	1.0988e-37	-	8	63296814	63299269	+	807	protein_coding	- && Q9SZ69.1 RecName: Full=Zinc finger A20 and AN1 domain-containing stress-associated protein 7; Short=AtSAP7	zf-A20
Solyc03g095310.3	59.8682	97.5049	76.7145	2107.84	1340.57	1248.67	78.0292	1565.7	-4.32543	7.61868e-40	1.10719e-37	-	3	57757807	57763917	-	1949	protein_coding	- && Q93Z79.1 RecName: Full=Cytochrome P450 714A1; AltName: Full=EUI-like P450 A1	p450
Solyc11g012930.2	703.179	889.732	695.478	11673.3	17652.4	7751.53	762.796	12359.1	-4.01809	6.54023e-39	9.44556e-37	-	11	5776936	5780201	+	1322	protein_coding	WAT1-related protein [Source:UniProtKB/TrEMBL;Acc:K4D697] && Q501F8.1 RecName: Full=WAT1-related protein At4g08300	DUF6
Solyc03g031530.3	39.1865	33.5173	111.034	3865.64	2223.53	3091.04	61.246	3060.07	-5.6411	7.95215e-39	1.14138e-36	-	3	4058071	4062827	-	1712	protein_coding	- && -	-
Solyc02g064970.3	0	0	0	7873.75	13552.9	9202.25	0	10209.6	-15.7075	2.0039e-38	2.85857e-36	-	2	36663163	36665161	+	1208	protein_coding	- && O80822.2 RecName: Full=Peroxidase 25; Short=Atperox P25; Flags: Precursor	-
Solyc07g009030.3	3.26554	0	0	4787.46	2872.92	2379.56	1.08851	3346.65	-11.6511	2.11999e-38	3.00574e-36	-	7	4015660	4016275	-	494	protein_coding	- && -	-
Solyc01g065980.3	10887.3	11301.4	11265.9	1312.45	1947.25	1783.95	11151.6	1681.22	2.72969	3.85657e-38	5.43472e-36	-	1	72593184	72602924	-	1291	protein_coding	- && P42736.2 RecName: Full=Ethylene-responsive transcription factor RAP2-3; AltName: Full=Cadmium-induced protein AS30; AltName: Full=Ethylene response factor 72; Short=ERF72; AltName: Full=Ethylene-responsive element binding protein; Short=AtEBP; AltName: Full=Protein RELATED TO APETALA2 3; Short=Related to AP2 3	AP2
Solyc07g005920.2	51.1601	29.4546	32.3008	1421.9	1234.24	728.711	37.6385	1128.28	-4.90873	4.08768e-38	5.7257e-36	-	7	751805	755174	-	3276	protein_coding	- && Q9ZUI0.1 RecName: Full=Putative leucine-rich repeat receptor-like serine/threonine-protein kinase At2g24130; Flags: Precursor	Pkinase
Solyc02g062710.1	783.729	727.224	1141.63	1.88706	0	3.83028	884.195	1.90578	8.86144	4.62077e-38	6.43366e-36	-	2	34991103	34992461	+	1359	protein_coding	- && Q9FF86.1 RecName: Full=BAHD acyltransferase DCR; AltName: Full=Protein DEFECTIVE IN CUTICULAR RIDGES; AltName: Full=Protein PERMEABLE LEAVES 3	-
Solyc07g063700.2	2401.26	2448.79	2180.31	155.682	80.7001	57.4542	2343.45	97.9455	4.58016	5.75153e-38	7.96039e-36	-	7	66222825	66231472	-	4689	protein_coding	- && O81832.4 RecName: Full=G-type lectin S-receptor-like serine/threonine-protein kinase At4g27290; Flags: Precursor	Pkinase_Tyr
Solyc05g052280.3	12274.1	13380.5	13229.2	1269.99	579.142	641.572	12961.3	830.235	3.9645	1.03986e-37	1.4307e-35	-	5	63410974	63414037	-	1260	protein_coding	Peroxidase [Source:UniProtKB/TrEMBL;Acc:K4C1Q9] && Q9FLC0.1 RecName: Full=Peroxidase 52; Short=Atperox P52; AltName: Full=ATP49; Flags: Precursor	-
Solyc07g008560.3	24795.2	24920.6	25486.4	3203.28	4804.98	3871.46	25067.4	3959.91	2.66228	1.3556e-37	1.85414e-35	-	7	3500634	3508016	+	2419	protein_coding	Purple acid phosphatase [Source:UniProtKB/TrEMBL;Acc:K4CBX5] && Q5MAU8.1 RecName: Full=Probable inactive purple acid phosphatase 27; Flags: Precursor	Metallophos
Solyc03g065250.3	980.75	944.578	1074	71.7082	34.1789	53.6239	999.777	53.1703	4.23272	1.472e-37	2.00157e-35	-	3	43244895	43248257	-	2069	protein_coding	- && F4HVY0.1 RecName: Full=Protein ECERIFERUM 1	-
Solyc08g081010.3	15561.4	16667.2	15355	3458.98	3114.08	2632.36	15861.2	3068.47	2.3699	2.32112e-37	3.13783e-35	-	8	64262128	64270158	-	2424	protein_coding	GSH1 [Source:UniProtKB/TrEMBL;Acc:G8XSL1] && O22493.1 RecName: Full=Glutamate--cysteine ligase, chloroplastic; AltName: Full=Gamma-ECS; Short=GCS; AltName: Full=Gamma-glutamylcysteine synthetase; Flags: Precursor	-
Solyc08g066100.3	547.522	563.7	590.5	3.77411	0	4.78785	567.241	2.85399	7.63629	2.56736e-37	3.45065e-35	-	8	54590941	54599045	-	2232	protein_coding	ATP-dependent 6-phosphofructokinase [Source:UniProtKB/TrEMBL;Acc:K4CLI8] && Q94AA4.1 RecName: Full=ATP-dependent 6-phosphofructokinase 3; Short=ATP-PFK 3; Short=Phosphofructokinase 3; AltName: Full=Phosphohexokinase 3	PFK
Solyc06g054610.2	1269.21	1104.04	1237.53	135.868	153.805	115.866	1203.59	135.18	3.15427	3.40509e-37	4.5503e-35	-	6	37441784	37445497	-	1858	protein_coding	- && Q941Q3.1 RecName: Full=Zinc finger CCCH domain-containing protein 37; Short=AtC3H37; AltName: Full=ENHANCER OF AG-4 protein 1	-
Solyc07g045350.3	21144.4	22318.5	21337.7	1088.83	2032.69	836.916	21600.2	1319.48	4.03299	3.59532e-37	4.77705e-35	-	7	58575885	58583088	-	2173	protein_coding	- && Q8S4Y1.1 RecName: Full=Acetyl-CoA acetyltransferase, cytosolic 1; AltName: Full=Cytosolic acetoacetyl-CoA thiolase 1; Short=Thiolase 1; AltName: Full=Protein EMBRYO DEFECTIVE 1276	Thiolase_N
Solyc09g075860.3	289.544	265.091	206.927	4845.96	3948.61	2408.29	253.854	3734.29	-3.87908	4.11814e-37	5.44063e-35	-	9	67932645	67945638	+	6306	protein_coding	Linoleate 9S-lipoxygenase 5 [Source:Projected from Arabidopsis thaliana (AT3G22400) UniProtKB/Swiss-Prot;Acc:Q9LUW0] && Q43191.1 RecName: Full=Probable linoleate 9S-lipoxygenase 5; AltName: Full=Leaf lipoxygenase	Lipoxygenase
Solyc10g078340.2	646.577	491.587	573.34	5093.17	4506.86	3541.09	570.501	4380.38	-2.94097	1.03191e-36	1.35559e-34	-	10	60285383	60296019	-	2877	protein_coding	- && Q8GX05.1 RecName: Full=Stomatal closure-related actin-binding protein 3	Cyclin_C
Solyc10g024490.2	1090.69	1249.28	1124.47	66.9905	102.537	53.6239	1154.81	74.3837	3.95641	1.04177e-36	1.36086e-34	-	10	14851859	14855783	-	2833	protein_coding	- && Q9LQL2.2 RecName: Full=Protein NRT1/ PTR FAMILY 7.3; Short=AtNPF7.3; AltName: Full=Nitrate transporter 1.5	-
Solyc05g052300.3	567.115	566.747	677.308	22.6447	18.9883	8.61813	603.724	16.7504	5.1705	1.31609e-36	1.70959e-34	-	5	63423199	63425766	-	1759	protein_coding	- && Q5XH90.1 RecName: Full=Sodium-coupled neutral amino acid transporter 2; AltName: Full=Amino acid transporter A2; AltName: Full=Solute carrier family 38 member 2; AltName: Full=System A amino acid transporter 2; AltName: Full=System A transporter 1; AltName: Full=System N amino acid transporter 2	Aa_trans
Solyc01g109710.3	4111.31	3465.49	3509.69	598.197	431.983	570.712	3695.5	533.631	2.79182	1.59984e-36	2.06663e-34	-	1	96514932	96517857	-	1132	protein_coding	Response to dessication 2 [Source:UniProtKB/TrEMBL;Acc:K4B3I4] && -	Usp
Solyc03g098740.1	11739.6	11866.1	11787.8	532.15	452.87	142.678	11797.8	375.899	4.97195	1.7777e-36	2.2837e-34	-	3	62445759	62446358	-	600	protein_coding	- && P24924.2 RecName: Full=Trypsin inhibitor; Contains: RecName: Full=Trypsin inhibitor chain A; Contains: RecName: Full=Trypsin inhibitor chain B; Flags: Precursor	-
Solyc07g054870.3	10.8851	30.4703	12.1128	776.524	1089.93	698.069	17.8227	854.84	-5.57974	1.83696e-36	2.34686e-34	-	7	63175842	63181772	-	1373	protein_coding	- && Q9ZSA7.1 RecName: Full=Protein DMR6-LIKE OXYGENASE 2; AltName: Full=2-oxoglutarate (2OG)-Fe(II) oxygenase-like protein DLO2; AltName: Full=Salicylate 3-hydroxylase DLO2; Short=S3H DLO2; Short=SA 3-hydroxylase DLO2; Short=Salicylic acid 3-hydroxylase DLO2	2OG-FeII_Oxy
Solyc07g009070.3	2.17703	15.2351	3.0282	1669.1	1078.53	698.069	6.81345	1148.57	-7.38744	2.22254e-36	2.82396e-34	-	7	4034536	4035012	-	303	protein_coding	- && -	-
Solyc09g089930.2	973.131	937.469	773.201	77.3694	75.0036	53.6239	894.6	68.6656	3.70325	2.33179e-36	2.94667e-34	-	9	70018961	70019644	+	684	protein_coding	- && Q8LDC8.2 RecName: Full=Ethylene-responsive transcription factor 1B; Short=AtERF1B; AltName: Full=Ethylene-responsive element-binding factor 1B; Short=EREBP-1B	AP2
Solyc10g084120.2	78.3729	141.179	139.297	1642.68	2773.24	1891.2	119.616	2102.37	-4.13425	2.81952e-36	3.54376e-34	-	10	63896303	63898707	-	1155	protein_coding	Plasmamembrane intrinsic protein 25 [Source:UniProtKB/TrEMBL;Acc:K4D3J8] && P43286.1 RecName: Full=Aquaporin PIP2-1; AltName: Full=Plasma membrane intrinsic protein 2-1; Short=AtPIP2;1; AltName: Full=Plasma membrane intrinsic protein 2a; Short=PIP2a; Contains: RecName: Full=Aquaporin PIP2-1, N-terminally processed	-
Solyc05g008220.3	2868.23	3173.99	2764.75	329.292	214.567	165.66	2935.66	236.506	3.63358	3.10931e-36	3.88697e-34	-	5	2614904	2616511	+	573	protein_coding	- && Q6NLC8.1 RecName: Full=Uncharacterized protein At1g66480	-
Solyc06g009050.3	8038.67	7968.99	8805.01	417.983	677.881	909.692	8270.89	668.519	3.62907	3.96694e-36	4.93258e-34	-	6	2978198	2981630	+	1759	protein_coding	- && -	Usp
Solyc02g094400.3	499.627	510.885	509.748	7113.26	4654.02	3872.41	506.753	5213.23	-3.36281	4.94914e-36	6.12113e-34	-	2	55567527	55570954	+	2923	protein_coding	Glycerophosphodiester phosphodiesterase GDPD1, chloroplastic [Source:Projected from Arabidopsis thaliana (AT3G02040) UniProtKB/Swiss-Prot;Acc:Q9SGA2] && Q9SGA2.1 RecName: Full=Glycerophosphodiester phosphodiesterase GDPD1, chloroplastic; AltName: Full=Glycerophosphodiester phosphodiesterase 1; Short=AtGDPD1; AltName: Full=Protein SENESCENCE-RELATED GENE 3; Flags: Precursor	-
Solyc11g066320.2	853.394	801.368	893.32	4264.75	3771.07	4295.66	849.361	4110.49	-2.27486	5.23837e-36	6.44459e-34	-	11	52339993	52341948	+	1692	protein_coding	Glycosyltransferase (Fragment) [Source:Projected from Arabidopsis thaliana (AT2G28110) UniProtKB/TrEMBL;Acc:W8Q712] && Q9ZUV3.1 RecName: Full=Probable glucuronoxylan glucuronosyltransferase IRX7; AltName: Full=Protein FRAGILE FIBER 8; AltName: Full=Protein IRREGULAR XYLEM 7	-
Solyc05g015470.1	962.246	857.23	809.54	93.4093	92.0931	77.5632	876.339	87.6885	3.32081	5.98691e-36	7.32672e-34	-	5	10598879	10599172	-	294	protein_coding	- && -	-
Solyc12g089360.2	44.629	59.9249	48.4513	1101.1	2612.79	1151.96	51.0017	1621.95	-4.99038	6.03924e-36	7.35206e-34	-	12	65467514	65471397	-	1839	protein_coding	- && Q43872.1 RecName: Full=Peroxidase 64; Short=Atperox P64; AltName: Full=ATP17a; AltName: Full=PRXR4; Flags: Precursor	-
Solyc04g071120.3	557.319	557.606	678.318	5492.28	3666.63	5511.77	597.747	4890.23	-3.03219	7.05052e-36	8.50168e-34	-	4	58109727	58124781	-	3689	protein_coding	- && F4JTP5.1 RecName: Full=Serine/threonine-protein kinase STY46; AltName: Full=Serine/threonine/tyrosine-protein kinase 46	Pkinase_Tyr
Solyc12g014010.2	4015.52	3715.34	3052.43	349.106	164.248	198.217	3594.43	237.19	3.92151	7.0567e-36	8.50168e-34	-	12	4844611	4847288	+	1529	protein_coding	- && Q2V6K0.1 RecName: Full=UDP-glucose flavonoid 3-O-glucosyltransferase 6; AltName: Full=Flavonol 3-O-glucosyltransferase 6; Short=FaGT6	UDPGT
Solyc11g073120.2	1283.36	1347.8	1242.57	11324.2	9447.61	17703.6	1291.24	12825.1	-3.31214	7.49414e-36	8.98215e-34	-	11	56508196	56509860	+	1084	protein_coding	- && Q9LX82.1 RecName: Full=Transcription factor MYB48; AltName: Full=Myb-related protein 48; Short=AtMYB48	Myb_DNA-binding
Solyc09g083290.3	193.755	161.492	231.153	2475.82	6249.99	3565.99	195.467	4097.27	-4.38962	8.05622e-36	9.60632e-34	-	9	69392019	69395016	+	977	protein_coding	Auxin-responsive protein [Source:UniProtKB/TrEMBL;Acc:G9HPW2] && Q38832.2 RecName: Full=Auxin-responsive protein IAA14; AltName: Full=Indoleacetic acid-induced protein 14; AltName: Full=Protein SOLITARY ROOT	-
Solyc12g009470.2	1207.16	1055.29	1258.72	7184.97	5618.63	6458.81	1173.72	6420.8	-2.45169	9.96418e-36	1.18208e-33	-	12	2722792	2729725	-	4815	protein_coding	Heme oxygenase 1 [Source:UniProtKB/TrEMBL;Acc:Q94FW7] && O48782.2 RecName: Full=Heme oxygenase 1, chloroplastic; Short=AtHO1; AltName: Full=Protein GENOMES UNCOUPLED 2; AltName: Full=Protein REVERSAL OF THE DET PHENOTYPE 4; Flags: Precursor	-
Solyc00g005000.3	145.861	187.9	125.166	1356.79	1713.69	1455.51	152.976	1508.66	-3.30177	1.03826e-35	1.22546e-33	-	SL3.00SC0000001	16480	17940	+	1377	protein_coding	Eukaryotic aspartyl protease family protein && Q9LHE3.1 RecName: Full=Protein ASPARTIC PROTEASE IN GUARD CELL 2; Short=AtASPG2; Flags: Precursor	-
Solyc01g108320.3	0	0	0	5119.59	10326.8	6196.44	0	7214.26	-15.2065	1.46322e-35	1.71832e-33	-	1	95566504	95570646	+	3819	protein_coding	Peroxidase [Source:UniProtKB/TrEMBL;Acc:K4B348] && Q9FX85.1 RecName: Full=Peroxidase 10; Short=Atperox P10; AltName: Full=ATP5a; Flags: Precursor	-
Solyc03g118190.3	1040.62	1061.38	1557.51	38.6847	26.5836	67.9875	1219.84	44.4186	4.7799	2.58936e-35	3.02552e-33	-	3	68617787	68618649	-	738	protein_coding	- && Q9FH54.1 RecName: Full=Ethylene-responsive transcription factor ERF114; AltName: Full=ERF bud enhancer	AP2
Solyc01g099910.3	1764.48	1618.99	1501.99	128.32	175.641	92.8843	1628.49	132.282	3.62168	3.17127e-35	3.68692e-33	-	1	89907367	89910286	-	1141	protein_coding	- && P34913.2 RecName: Full=Bifunctional epoxide hydrolase 2; Includes: RecName: Full=Cytosolic epoxide hydrolase 2; Short=CEH; AltName: Full=Epoxide hydratase; AltName: Full=Soluble epoxide hydrolase; Short=SEH; Includes: RecName: Full=Lipid-phosphate phosphatase	Abhydrolase_1
Solyc01g080960.3	28.3013	86.3324	24.2256	1747.42	1882.69	2293.38	46.2865	1974.49	-5.413	5.35466e-35	6.19436e-33	-	1	80143548	80150343	-	648	protein_coding	- && O82166.1 RecName: Full=AT-hook motif nuclear-localized protein 21; AltName: Full=Protein GIANT KILLER	-
Solyc02g090120.1	12785.7	12782.3	13153.5	322.687	154.754	656.893	12907.2	378.111	5.09328	6.81626e-35	7.84613e-33	-	2	52381758	52382018	-	261	protein_coding	- && -	-
Solyc06g073990.2	364.652	505.806	518.832	6.6047	11.393	12.4484	463.097	10.1487	5.51309	7.57563e-35	8.67727e-33	-	6	45877267	45878596	+	1231	protein_coding	- && -	-
Solyc11g069430.2	13738.1	12891	12870.9	71204.3	70712.3	54144.8	13166.7	65353.8	-2.31139	8.38758e-35	9.56019e-33	-	11	54305254	54308455	-	1395	protein_coding	- && Q8H5N9.1 RecName: Full=Probable aquaporin PIP2-1; AltName: Full=OsPIP2;1; AltName: Full=Plasma membrane intrinsic protein 2-1; AltName: Full=Plasma membrane intrinsic protein 2a; Short=PIP2a	-
Solyc07g052120.3	487.654	383.925	385.591	11.3223	10.4435	13.406	419.057	11.724	5.15979	9.18732e-35	1.04207e-32	-	7	60791861	60793232	-	1177	protein_coding	- && B5A435.1 RecName: Full=Sesquiterpene synthase; Short=SaSesquiTPS1 [Santalum album]	-
Solyc03g119530.3	16505.1	15782.6	14988.6	2655.09	2904.26	3589.93	15758.8	3049.76	2.3694	1.34934e-34	1.52305e-32	-	3	69594152	69603197	+	2864	protein_coding	- && Q9M886.1 RecName: Full=LOB domain-containing protein 41; AltName: Full=ASYMMETRIC LEAVES 2-like protein 38; Short=AS2-like protein 38	-
Solyc06g076820.1	1341.05	1278.74	1313.23	5973.48	5294.88	5417.93	1311	5562.1	-2.08499	1.5458e-34	1.73637e-32	-	6	47859704	47860846	+	1143	protein_coding	- && -	-
Solyc00g026160.3	0	0	0	9385.28	5790.47	4062.97	0	6412.91	-15.0367	1.84977e-34	2.06783e-32	-	SL3.00SC0000172	422	4537	+	1766	protein_coding	Ferric reductase oxidase && Q9FLW2.1 RecName: Full=Ferric reduction oxidase 5; Short=AtFRO5; AltName: Full=Ferric-chelate reductase 5	FAD_binding_8
Solyc03g119540.3	543.168	487.524	475.428	6.6047	0	3.83028	502.04	3.47833	7.1716	6.03046e-34	6.70911e-32	-	3	69603307	69604885	-	1484	protein_coding	- && Q8RWD0.2 RecName: Full=Zinc finger protein CONSTANS-LIKE 16	CCT
Solyc01g094040.3	2904.15	2830.69	2816.23	470.821	582.94	577.415	2850.36	543.725	2.39022	1.02597e-33	1.13599e-31	-	1	85487166	85489626	-	1094	protein_coding	- && -	Cu_bind_like
Solyc06g073740.3	2509.02	2415.28	2627.47	300.986	438.629	386.858	2517.26	375.491	2.74505	1.27036e-33	1.39993e-31	-	6	45645596	45650948	+	2413	protein_coding	- && A7LXU3.1 RecName: Full=Beta-glucosidase BoGH3B; AltName: Full=Glycosyl hydrolase family protein 3B; Short=BoGH3B; Flags: Precursor	Glyco_hydro_3
Solyc08g008080.1	64.2223	59.9249	14.1316	1557.77	2289.98	2978.04	46.0929	2275.26	-5.62739	1.48682e-33	1.63073e-31	-	8	2554169	2554645	-	477	protein_coding	- && Q6NML0.1 RecName: Full=E3 ubiquitin-protein ligase ATL76; AltName: Full=RING-H2 finger protein ATL76; AltName: Full=RING-type E3 ubiquitin transferase ATL76	-
Solyc05g015850.3	3926.27	3981.45	3667.16	345.332	377.866	591.778	3858.29	438.325	3.13797	1.70445e-33	1.86065e-31	-	5	12422417	12425099	-	783	protein_coding	WRKY75 [Source:Projected from Arabidopsis thaliana (AT5G13080) UniProtKB/TrEMBL;Acc:A0A178UJF4] && Q9FYA2.1 RecName: Full=Probable WRKY transcription factor 75; AltName: Full=WRKY DNA-binding protein 75	WRKY
Solyc11g006090.2	743.454	620.578	668.224	3514.64	3155.85	3268.19	677.419	3312.89	-2.29017	1.93247e-33	2.09971e-31	-	11	876923	878506	+	1271	protein_coding	AT-hook motif nuclear-localized protein 19 [Source:Projected from Arabidopsis thaliana (AT3G04570) UniProtKB/Swiss-Prot;Acc:Q9SR17] && Q8GWQ2.1 RecName: Full=AT-hook motif nuclear-localized protein 20	-
Solyc02g086460.3	13733.8	14505.9	14607	675.567	470.909	1310.91	14282.2	819.13	4.12403	2.48017e-33	2.68227e-31	-	2	49761704	49779431	+	12110	protein_coding	- && -	-
Solyc10g081955.1	4036.21	4087.08	4322.26	783.129	970.3	853.195	4148.51	868.875	2.25539	2.65568e-33	2.85879e-31	-	10	63011134	63011769	+	636	protein_coding	- && Q9SJ54.1 RecName: Full=NDR1/HIN1-like protein 12	-
Solyc11g005350.2	3277.51	3361.89	3709.55	31.1364	152.856	70.8602	3449.65	84.9507	5.34377	2.96151e-33	3.17332e-31	-	11	273851	279832	-	1550	protein_coding	WAT1-related protein [Source:UniProtKB/TrEMBL;Acc:K4D4E8] && Q9LI65.1 RecName: Full=WAT1-related protein At3g30340	DUF6
Solyc11g005480.2	404.927	611.437	387.61	3.77411	1.89883	5.74542	467.991	3.80612	6.94354	3.07454e-33	3.27932e-31	-	11	379170	381204	-	1827	protein_coding	- && Q39962.1 RecName: Full=Citrate-binding protein; Flags: Precursor	-
Solyc12g035400.2	303.695	257.982	220.05	2166.34	3177.69	4312.9	260.575	3218.97	-3.62717	3.20675e-33	3.40472e-31	-	12	40179317	40184848	+	1329	protein_coding	WAT1-related protein [Source:UniProtKB/TrEMBL;Acc:K4DE01] && Q8GXB4.1 RecName: Full=WAT1-related protein At1g09380	DUF6
Solyc03g006080.3	1481.47	1084.74	1104.29	123.602	73.1048	85.2237	1223.5	93.9769	3.70228	3.51195e-33	3.71182e-31	-	3	758962	763436	+	4076	protein_coding	- && C0LGP4.1 RecName: Full=Probable LRR receptor-like serine/threonine-protein kinase At3g47570; Flags: Precursor	Pkinase
Solyc05g052680.1	887.138	719.098	792.38	51.8941	67.4083	36.3877	799.539	51.8967	3.94512	4.32051e-33	4.54573e-31	-	5	63744947	63746320	-	1374	protein_coding	- && Q9FF86.1 RecName: Full=BAHD acyltransferase DCR; AltName: Full=Protein DEFECTIVE IN CUTICULAR RIDGES; AltName: Full=Protein PERMEABLE LEAVES 3	-
Solyc07g017570.2	55.5142	7.10973	13.1222	3070.24	2036.49	2057.82	25.2487	2388.18	-6.57084	4.39672e-33	4.60506e-31	-	7	7536315	7537532	-	606	protein_coding	- && -	-
Solyc05g005160.3	23775.3	22677	22757	1886.11	2819.76	1221.86	23069.7	1975.91	3.5454	4.59909e-33	4.79543e-31	-	5	141137	145033	-	1767	protein_coding	- && O22718.1 RecName: Full=ATP-citrate synthase alpha chain protein 2; Short=ATP-citrate synthase A-2; AltName: Full=ATP-citrate lyase A-2; AltName: Full=Citrate cleavage enzyme A-2	-
Solyc05g046000.3	0	0	0	4326.08	4859.1	3361.07	0	4182.08	-14.4199	5.8885e-33	6.11248e-31	-	5	58884977	58887187	+	1167	protein_coding	- && Q43735.1 RecName: Full=Peroxidase 27; Short=Atperox P27; AltName: Full=ATP12a; AltName: Full=PRXR7; Flags: Precursor	-
Solyc01g008870.2	679.232	788.164	774.211	12.2659	0	2.87271	747.202	5.04619	7.20698	5.9831e-33	6.18307e-31	-	1	2820435	2828724	-	2058	protein_coding	- && O49840.1 RecName: Full=Protein kinase 2B, chloroplastic; Flags: Precursor	Pkinase
Solyc01g095080.3	705.356	837.932	799.446	33.0235	8.54472	14.3636	780.912	18.6439	5.38745	6.7404e-33	6.93486e-31	ACS2	1	86328345	86331529	-	2121	protein_coding	1-aminocyclopropane-1-carboxylate synthase 2 [Source:UniProtKB/Swiss-Prot;Acc:P18485] && P18485.2 RecName: Full=1-aminocyclopropane-1-carboxylate synthase 2; Short=ACC synthase 2; AltName: Full=Le-ACS2; Short=ACS-2; AltName: Full=S-adenosyl-L-methionine methylthioadenosine-lyase 2	Aminotran_1_2
Solyc08g076870.1	920.882	919.186	1006.37	108.506	121.525	87.1389	948.814	105.723	3.16573	7.17978e-33	7.35437e-31	-	8	60914312	60915049	+	738	protein_coding	- && -	-
Solyc08g080630.3	32082.8	33061.3	33255.7	9226.77	9687.81	9602.51	32799.9	9505.7	1.78683	7.61532e-33	7.76629e-31	-	8	64000788	64002067	-	697	protein_coding	- && P20076.1 RecName: Full=Ethylene-responsive proteinase inhibitor 1; AltName: Full=Ethylene-responsive proteinase inhibitor I; Flags: Precursor	-
Solyc01g103390.3	349.413	365.643	199.861	8301.17	6515.82	3394.59	304.972	6070.53	-4.31529	7.85849e-33	7.97928e-31	-	1	91878110	91882287	-	2735	protein_coding	- && Q9FEX0.1 RecName: Full=12-oxophytodienoate reductase-like protein; AltName: Full=LeOPR2	Oxidored_FMN
Solyc10g075150.2	3421.2	3398.45	3738.82	0	0	0	3519.49	0	14.2976	8.79946e-33	8.89587e-31	-	10	58931442	58933070	-	763	protein_coding	- && P93224.1 RecName: Full=Non-specific lipid-transfer protein 2; Short=LTP 2; Flags: Precursor	-
Solyc12g006510.2	579.089	473.305	445.146	24.5317	17.0894	26.812	499.18	22.811	4.45178	9.27143e-33	9.33243e-31	-	12	1015299	1049113	+	7132	protein_coding	- && E7DN63.1 RecName: Full=Beta-amyrin synthase; AltName: Full=Triterpenoid synthase 1; Short=SlTTS1	-
Solyc01g073720.2	82.727	33.5173	66.6205	2447.51	1075.69	1790.66	60.9549	1771.28	-4.86247	1.16553e-32	1.16815e-30	-	1	80962981	80963531	+	551	protein_coding	- && -	-
Solyc06g069150.1	2457.86	2919.05	2845.5	112.28	107.284	27.7695	2740.81	82.4444	5.05472	1.24048e-32	1.23792e-30	-	6	43046565	43047302	+	738	protein_coding	- && -	-
Solyc03g112060.3	1117.9	1046.15	1192.1	168.892	149.058	131.187	1118.72	149.712	2.90146	1.47196e-32	1.46265e-30	-	3	64079555	64086586	+	3056	protein_coding	SUFE3 [Source:Projected from Arabidopsis thaliana (AT5G50210) UniProtKB/TrEMBL;Acc:A0A178UIT6] && Q9FGS4.1 RecName: Full=Quinolinate synthase, chloroplastic; AltName: Full=Protein ONSET OF LEAF DEATH 5; AltName: Full=Protein SULFUR E 3; Flags: Precursor	-
Solyc09g090470.3	1780.81	1937.91	1928.97	378.355	346.536	315.998	1882.56	346.963	2.43982	1.58127e-32	1.56458e-30	-	9	70456847	70463570	+	2011	protein_coding	- && Q9FNL7.1 RecName: Full=Protein NRT1/ PTR FAMILY 5.2; Short=AtNPF5.2; AltName: Full=Peptide transporter PTR3-A; Short=AtPTR3	-
Solyc03g032040.3	67.4878	141.179	94.8837	3680.71	1469.69	2500.22	101.183	2550.2	-4.65459	1.60735e-32	1.58365e-30	-	3	4581413	4585758	+	2525	protein_coding	Tonoplast monosaccharide transporter 1 [Source:UniProtKB/TrEMBL;Acc:K4BFH5] && Q8LPQ8.2 RecName: Full=Monosaccharide-sensing protein 2; AltName: Full=Sugar transporter MSSP2	Sugar_tr
Solyc12g005850.2	3833.74	4075.91	4277.84	436.854	598.13	319.828	4062.5	451.604	3.1692	1.63772e-32	1.60677e-30	-	12	481458	489045	-	2082	protein_coding	Protein DETOXIFICATION [Source:UniProtKB/TrEMBL;Acc:K4DBC3] && Q9LVD9.1 RecName: Full=Protein DETOXIFICATION 40; Short=AtDTX40; AltName: Full=Multidrug and toxic compound extrusion protein 40; Short=MATE protein 40	MatE
Solyc03g006490.3	679.232	764.804	1053.82	6781.14	10783.4	6879.18	832.617	8147.92	-3.29055	1.65122e-32	1.6132e-30	-	3	1074637	1077475	+	1155	protein_coding	- && -	-
Solyc06g071060.2	3097.91	3226.8	2996.91	623.672	722.503	602.312	3107.21	649.496	2.25822	1.74364e-32	1.69636e-30	-	6	43801316	43805504	+	1503	protein_coding	- && Q08632.1 RecName: Full=Short-chain type dehydrogenase/reductase	adh_short
Solyc07g042190.3	6989.34	7719.13	7996.48	1647.4	1675.71	1922.8	7568.32	1748.64	2.11377	1.9711e-32	1.90967e-30	-	7	55338542	55339977	-	1328	protein_coding	- && Q8LGS1.2 RecName: Full=Protein MARD1; AltName: Full=Mediator of ABA-regulated dormancy1; AltName: Full=Senescence-associated protein SAG102	-
Solyc03g119210.1	21853	25176.6	22795.3	2112.56	3305.86	3734.52	23275	3050.98	2.93145	4.03548e-32	3.89348e-30	-	3	69355846	69356127	+	282	protein_coding	- && P86809.1 RecName: Full=Non-specific lipid-transfer protein 2; AltName: Full=Allergen Api g 6.0101; AltName: Allergen=Api g 6	-
Solyc07g017220.3	280.836	319.938	367.422	2064.44	3211.87	2562.46	322.732	2612.92	-3.01693	4.10027e-32	3.93965e-30	-	7	6511725	6514702	-	1143	protein_coding	- && Q8LGS1.2 RecName: Full=Protein MARD1; AltName: Full=Mediator of ABA-regulated dormancy1; AltName: Full=Senescence-associated protein SAG102	-
Solyc02g089250.3	24906.3	27070.8	26728.9	1590.79	1351.96	448.143	26235.3	1130.3	4.53671	4.53777e-32	4.34207e-30	-	2	51753568	51756198	+	2068	protein_coding	- && -	-
Solyc02g082760.3	1058.03	963.876	1162.83	10365.6	5940.48	8643.03	1061.58	8316.37	-2.96973	5.23465e-32	4.98836e-30	-	2	46957638	46962227	-	2114	protein_coding	Catalase [Source:UniProtKB/TrEMBL;Acc:K4BAE6] && Q9XHH3.1 RecName: Full=Catalase isozyme 2	Catalase
Solyc08g068690.1	4624	4980.87	5357.9	918.053	780.418	589.863	4987.59	762.778	2.70897	5.34576e-32	5.07345e-30	-	8	57884153	57884875	-	723	protein_coding	- && Q9SMB8.1 RecName: Full=Tyramine N-feruloyltransferase 4/11; AltName: Full=Hydroxycinnamoyl-CoA: tyramine N-hydroxycinnamoyltransferase	Acetyltransf_1
Solyc09g009130.3	1597.94	1570.23	1907.77	178.327	254.443	237.477	1691.98	223.416	2.92102	6.80354e-32	6.43073e-30	-	9	2464872	2466169	-	553	protein_coding	Putative phytosulfokine peptide [Source:UniProtKB/TrEMBL;Acc:Q7PCA9] && -	-
Solyc01g111235.1	18.5047	16.2508	20.188	382.129	519.329	424.204	18.3145	441.887	-4.59263	8.3162e-32	7.82868e-30	-	1	97467378	97467938	+	561	protein_coding	- && Q9FIG7.1 RecName: Full=Dirigent protein 2; Short=AtDIR2; Flags: Precursor	-
Solyc01g100530.3	150.215	93.4422	130.213	1238.85	1689.96	1200.79	124.623	1376.53	-3.46624	9.48754e-32	8.89533e-30	-	1	90410580	90422272	-	4386	protein_coding	- && -	-
Solyc02g069190.3	0	0	0	7392.55	2214.03	5216.84	0	4941.14	-14.6605	1.06229e-31	9.91979e-30	-	2	39722725	39724911	+	1053	protein_coding	- && Q8W245.2 RecName: Full=Probable zinc transporter 10; AltName: Full=ZRT/IRT-like protein 10; Flags: Precursor	-
Solyc08g078930.1	103.409	234.621	114.062	6891.53	12932.9	2869.84	150.697	7564.76	-5.64917	1.29858e-31	1.20778e-29	-	8	62706657	62707064	-	408	protein_coding	- && P14009.1 RecName: Full=14 kDa proline-rich protein DC2.15; Flags: Precursor	-
Solyc05g015300.3	0	0	0	2874.93	8705.17	3376.39	0	4985.5	-14.6734	1.52694e-31	1.412e-29	-	5	10295220	10297910	-	1286	protein_coding	- && B9G9L9.1 RecName: Full=BURP domain-containing protein 17; Short=OsBURP17; Flags: Precursor	-
Solyc11g013810.2	4879.8	4708.67	5104.54	651.978	753.834	419.416	4897.67	608.409	3.00893	1.53029e-31	1.412e-29	-	11	7176907	7181577	-	3289	protein_coding	- && P17570.1 RecName: Full=Nitrate reductase [NADH]; Short=NR	FAD_binding_6
Solyc07g049530.3	16828.4	18796.1	18521.5	1723.83	1772.55	759.353	18048.7	1418.58	3.66935	1.96668e-31	1.80748e-29	ACO1	7	59957577	59960265	+	2036	protein_coding	1-aminocyclopropane-1-carboxylate oxidase 1 [Source:UniProtKB/Swiss-Prot;Acc:P05116] && P05116.2 RecName: Full=1-aminocyclopropane-1-carboxylate oxidase 1; Short=ACC oxidase 1; AltName: Full=Ethylene-forming enzyme; Short=EFE; AltName: Full=Protein pTOM 13	2OG-FeII_Oxy
Solyc09g092040.3	5912.8	5954.91	5703.12	822.757	1032.96	1230.48	5856.94	1028.73	2.50932	2.21572e-31	2.02834e-29	-	9	71685973	71690986	+	1116	protein_coding	- && Q5XI55.2 RecName: Full=Peptide-N(4)-(N-acetyl-beta-glucosaminyl)asparagine amidase; Short=PNGase; AltName: Full=N-glycanase 1; AltName: Full=Peptide:N-glycanase	-
Solyc12g044950.2	24517.7	24947	24836.3	540.642	409.197	1561.8	24767	837.212	4.88672	3.58126e-31	3.26555e-29	-	12	61236791	61237892	-	1035	protein_coding	- && Q8GZC3.1 RecName: Full=Delta(12)-fatty-acid desaturase FAD2	-
Solyc12g096620.1	0	0	0	3326.88	5730.66	2392.01	0	3816.52	-14.2879	5.17205e-31	4.69768e-29	-	12	66436313	66437455	-	1143	protein_coding	- && Q3MKY2.1 RecName: Full=Acetylajmalan esterase; Flags: Precursor	Lipase_GDSL
Solyc04g077615.1	5966.14	5952.88	5913.07	1627.59	1625.4	1690.11	5944.03	1647.7	1.85099	6.20935e-31	5.61789e-29	-	4	62662321	62696277	+	7145	protein_coding	- && Q9FJL3.1 RecName: Full=Peptidyl-prolyl cis-trans isomerase FKBP65; Short=PPIase FKBP65; AltName: Full=70 kDa peptidyl-prolyl isomerase; AltName: Full=FK506-binding protein 65; Short=AtFKBP65; AltName: Full=Immunophilin FKBP65; AltName: Full=Peptidyl-prolyl isomerase ROF2; AltName: Full=Protein ROTAMASE FKBP 2; AltName: Full=Rotamase	Peptidase_S10
Solyc05g050520.3	54.4257	90.3951	53.4983	1290.75	821.242	971.934	66.1064	1027.97	-3.95797	6.8805e-31	6.20099e-29	-	5	61511546	61524473	+	2876	protein_coding	- && Q9ZPY1.2 RecName: Full=Pyridoxine/pyridoxamine 5'-phosphate oxidase 2; Short=AtPPOX1	-
Solyc03g032210.3	103.409	150.32	155.448	3729.77	1484.88	2315.4	136.392	2510.02	-4.20122	8.25569e-31	7.41163e-29	-	3	4740921	4743812	+	1960	protein_coding	- && Q9SEY5.1 RecName: Full=Probable acyl-activating enzyme 2; AltName: Full=AMP-binding protein 2; Short=AtAMPBP2	AMP-binding
Solyc01g103030.3	1759.04	1631.18	1940.07	268.906	222.163	312.168	1776.76	267.745	2.73038	1.03445e-30	9.25116e-29	-	1	91573973	91578496	-	2059	protein_coding	Protein NRT1/ PTR FAMILY 4.3 [Source:Projected from Arabidopsis thaliana (AT1G59740) UniProtKB/Swiss-Prot;Acc:Q93VV5] && Q93VV5.1 RecName: Full=Protein NRT1/ PTR FAMILY 4.3; Short=AtNPF4.3; AltName: Full=Nitrate transporter 1.14	-
Solyc06g074990.2	105.586	109.693	96.9025	7169.87	1436.46	3898.27	104.06	4168.2	-5.32398	1.17502e-30	1.0468e-28	-	6	46631149	46633554	-	2175	protein_coding	- && Q9FJH8.1 RecName: Full=High affinity nitrate transporter 2.4; Short=AtNRT2:4	MFS_1
Solyc03g113970.3	90.3466	60.9405	113.053	2806.05	1075.69	2497.34	88.1134	2126.36	-4.59289	1.1925e-30	1.05832e-28	-	3	65510146	65527333	+	6092	protein_coding	- && C0SVV6.1 RecName: Full=Calmodulin-binding protein 60 A	-
Solyc06g076160.3	2947.69	2925.15	2947.45	115.111	121.525	26.812	2940.1	87.8158	5.06495	1.28272e-30	1.13406e-28	-	6	47430845	47431408	-	564	protein_coding	- && O81970.1 RecName: Full=Cytochrome P450 71A9; AltName: Full=Cytochrome P450 CP1	p450
Solyc10g017960.2	268.863	171.649	248.313	3267.44	2113.39	4789.77	229.608	3390.2	-3.88441	1.38735e-30	1.22192e-28	-	10	6167865	6170754	-	1118	protein_coding	- && Q9LEX0.1 RecName: Full=F-box protein PP2-A13; AltName: Full=Protein PHLOEM PROTEIN 2-LIKE A13; Short=AtPP2-A13; AltName: Full=SKP1-interacting partner 9	-
Solyc06g005310.3	123.002	227.511	140.307	2066.33	1689.01	2837.28	163.607	2197.54	-3.74694	1.52431e-30	1.33749e-28	-	6	330897	332473	-	1358	protein_coding	- && Q9LX82.1 RecName: Full=Transcription factor MYB48; AltName: Full=Myb-related protein 48; Short=AtMYB48	Myb_DNA-binding
Solyc04g055207.1	560.584	608.39	544.067	26.4188	45.5718	26.812	571.014	32.9342	4.11583	1.61716e-30	1.41361e-28	-	4	53817183	53818388	-	515	protein_coding	- && -	-
Solyc05g018125.1	154.569	126.959	90.8461	2676.79	1978.58	1259.2	124.125	1971.52	-3.99029	1.96697e-30	1.71295e-28	-	5	20057122	20063090	+	2555	protein_coding	- && Q7LL04.2 RecName: Full=UPF0676 protein C1494.01	2OG-FeII_Oxy
Solyc07g065880.3	26.1243	19.2978	25.235	496.296	470.909	390.689	23.5524	452.631	-4.26567	2.09396e-30	1.81674e-28	-	7	67596619	67604809	-	4528	protein_coding	Kinesin-like protein 1 [Source:Projected from Arabidopsis thaliana (AT3G44730) UniProtKB/TrEMBL;Acc:A0A1I9LSV1] && Q8W1Y3.2 RecName: Full=Kinesin-like protein KIN-14F; AltName: Full=AtKIN14h; AltName: Full=Kinesin KP1; AltName: Full=Kinesin-like protein 1; Short=AtKP1	Kinesin
Solyc07g052670.3	507.247	426.584	491.578	16085.3	4670.16	9084.47	475.136	9946.64	-4.38784	2.17168e-30	1.87717e-28	-	7	61243579	61248295	-	1526	protein_coding	- && Q9FH37.1 RecName: Full=Transcription factor ILR3; AltName: Full=Basic helix-loop-helix protein 105; Short=AtbHLH105; Short=bHLH 105; AltName: Full=Protein IAA-LEUCINE RESISTANT 3; AltName: Full=Transcription factor EN 133; AltName: Full=bHLH transcription factor bHLH105	HLH
Solyc07g008103.1	4281.12	3626.98	3923.54	661.414	707.313	463.464	3943.88	610.73	2.69094	2.24295e-30	1.93159e-28	-	7	2831399	2832952	-	514	protein_coding	- && Q9SK27.2 RecName: Full=Early nodulin-like protein 1; AltName: Full=Phytocyanin-like protein; Flags: Precursor	Cu_bind_like
Solyc04g040180.3	8450.13	8108.14	8078.24	985.044	453.82	438.567	8212.17	625.81	3.7139	2.36311e-30	2.02757e-28	-	4	11959993	11962254	+	1179	protein_coding	- && Q55EX9.2 RecName: Full=Putative methyltransferase DDB_G0268948	Methyltransf_11
Solyc07g009080.3	0	0	0	3358.02	3363.77	2085.59	0	2935.79	-13.9094	2.46475e-30	2.107e-28	-	7	4037471	4038069	-	366	protein_coding	- && -	-
Solyc12g055700.2	32.6554	53.8308	62.5829	1195.45	778.519	748.82	49.6897	907.597	-4.18865	2.56761e-30	2.18689e-28	-	12	62616870	62618446	-	822	protein_coding	- && -	-
Solyc03g006970.1	412.546	425.568	392.657	14.1529	22.7859	20.109	410.257	19.0159	4.43162	2.58691e-30	2.19529e-28	-	3	1528438	1530765	-	2328	protein_coding	SBT2 protein [Source:UniProtKB/TrEMBL;Acc:P93205] && Q9FLI4.1 RecName: Full=Subtilisin-like protease SBT1.3; AltName: Full=Subtilase subfamily 1 member 3; Short=AtSBT1.3; Flags: Precursor	Peptidase_S8
Solyc08g023510.2	1569.64	1599.69	1482.81	104.732	134.817	51.7088	1550.71	97.0857	3.99729	2.59947e-30	2.19793e-28	-	8	27544108	27546301	-	743	protein_coding	- && -	-
Solyc03g117280.3	57.6912	124.928	177.655	4741.23	1960.54	3965.3	120.091	3555.69	-4.88673	3.83904e-30	3.23425e-28	-	3	67943005	67947630	+	2393	protein_coding	- && -	-
Solyc01g080280.3	27.2128	33.5173	19.1786	1034.11	940.869	451.973	26.6362	808.983	-4.92507	3.9279e-30	3.29717e-28	-	1	79383392	79388900	+	1905	protein_coding	Glutamine synthetase [Source:UniProtKB/TrEMBL;Acc:K4AXS2] && O22506.1 RecName: Full=Glutamine synthetase, chloroplastic; AltName: Full=GS2; AltName: Full=Glutamate--ammonia ligase; Flags: Precursor	-
Solyc02g080050.2	6411.34	6304.3	5755.61	633.108	236.404	297.804	6157.08	389.105	3.98393	5.03671e-30	4.21272e-28	-	2	44908346	44957593	-	14737	protein_coding	- && Q8S9L6.1 RecName: Full=Cysteine-rich receptor-like protein kinase 29; Short=Cysteine-rich RLK29; Flags: Precursor	Pkinase_Tyr
Solyc02g090470.3	164.365	162.508	266.482	3108.93	6085.74	2407.33	197.785	3867.33	-4.289	5.38451e-30	4.48747e-28	-	2	52639285	52647215	+	1005	protein_coding	- && Q9FX85.1 RecName: Full=Peroxidase 10; Short=Atperox P10; AltName: Full=ATP5a; Flags: Precursor	-
Solyc04g006940.3	200.286	168.602	173.617	6273.52	1941.55	3369.69	180.835	3861.59	-4.41664	5.72198e-30	4.75169e-28	-	4	625533	631366	-	4382	protein_coding	Phospholipid-transporting ATPase [Source:UniProtKB/TrEMBL;Acc:K4BNK1] && Q9SX33.1 RecName: Full=Putative phospholipid-transporting ATPase 9; Short=AtALA9; AltName: Full=Aminophospholipid flippase 9	-
Solyc02g071130.3	924.148	913.092	877.17	115.111	92.0931	129.272	904.803	112.159	3.01213	6.90637e-30	5.71484e-28	-	2	41178986	41180342	-	855	protein_coding	- && Q93WV4.1 RecName: Full=Probable WRKY transcription factor 71; AltName: Full=WRKY DNA-binding protein 71	WRKY
Solyc10g055190.1	13.0622	9.14108	0	1112.42	1176.32	519.003	7.40108	935.915	-6.99427	7.6785e-30	6.33122e-28	-	10	56391076	56391645	+	570	protein_coding	Dirigent protein [Source:UniProtKB/TrEMBL;Acc:K4D1B2] && Q9SS03.1 RecName: Full=Dirigent protein 21; Short=AtDIR21; Flags: Precursor	-
Solyc01g104820.3	0	0	0	2283.34	3846.07	2263.7	0	2797.7	-13.8399	8.049e-30	6.61326e-28	-	1	93055012	93063677	+	2289	protein_coding	- && Q9M2C0.1 RecName: Full=Vacuolar iron transporter homolog 4; AltName: Full=Protein NODULIN-LIKE 4	DUF125
Solyc08g076885.1	90.3466	78.207	84.7897	755.767	995.935	1370.28	84.4478	1040.66	-3.62363	1.11014e-29	9.0891e-28	-	8	60939575	60949351	+	1695	protein_coding	- && -	-
Solyc02g063520.3	742.366	585.029	807.521	50.9506	60.7624	34.4725	711.639	48.7285	3.86801	1.32733e-29	1.08291e-27	-	2	36162030	36163596	+	1196	protein_coding	- && P46604.1 RecName: Full=Homeobox-leucine zipper protein HAT22; AltName: Full=Homeodomain-leucine zipper protein HAT22; Short=HD-ZIP protein 22	Homeobox
Solyc06g075630.3	320.023	327.048	298.783	2873.04	6460.76	3204.03	315.284	4179.28	-3.72856	1.35904e-29	1.10491e-27	-	6	47149344	47150698	-	1090	protein_coding	- && Q9LQQ0.1 RecName: Full=Dirigent protein 25; Short=AtDIR25; Flags: Precursor	-
Solyc08g079730.1	181.782	137.116	230.144	1884.23	1973.83	3482.68	183.014	2446.91	-3.74086	1.5196e-29	1.23114e-27	-	8	63339112	63340554	+	1443	protein_coding	Protein DETOXIFICATION [Source:UniProtKB/TrEMBL;Acc:K4CNX3] && O49660.1 RecName: Full=Protein DETOXIFICATION 56; Short=AtDTX56; AltName: Full=Multidrug and toxic compound extrusion protein 56; Short=MATE protein 56; AltName: Full=Protein RESISTANT TO HIGH CARBON DIOXIDE 1	MatE
Solyc01g095070.3	3318.88	2970.85	3391.59	757.654	669.336	774.674	3227.11	733.888	2.1366	1.90488e-29	1.53793e-27	-	1	86311281	86313721	+	869	nontranslating_CDS	- && O03982.1 RecName: Full=Heavy metal-associated isoprenylated plant protein 39; Short=AtHIP39; Flags: Precursor	-
Solyc07g051950.3	582.354	629.719	940.762	2.83059	0	0.95757	717.612	1.26272	9.14647	2.0341e-29	1.63657e-27	-	7	60632183	60634858	-	1295	protein_coding	- && Q5E930.1 RecName: Full=S-type anion channel SLAH1; AltName: Full=SLAC1-homolog protein 1	C4dic_mal_tran
Solyc09g064940.3	23995.2	24698.2	24067.2	5514.93	6088.59	4355.03	24253.5	5319.51	2.18882	2.12258e-29	1.70187e-27	-	9	62711504	62719502	+	2117	protein_coding	- && Q9KG32.1 RecName: Full=Uncharacterized isomerase BH0283	-
Solyc11g012700.2	2366.43	2392.93	2542.68	397.226	335.143	229.817	2434.01	320.728	2.92381	2.42309e-29	1.93614e-27	-	11	5469267	5474170	+	3303	protein_coding	oligopeptide transporter [Source:Projected from Arabidopsis thaliana (AT4G16370) TAIR;Acc:AT4G16370] && O23482.3 RecName: Full=Oligopeptide transporter 3; Short=AtOPT3	OPT
Solyc11g068430.2	14873.4	15185.4	15131.9	1773.83	3008.69	2490.64	15063.6	2424.39	2.63538	2.51836e-29	2.00537e-27	-	11	53445884	53449614	+	864	protein_coding	- && P27788.1 RecName: Full=Ferredoxin-3, chloroplastic; AltName: Full=Ferredoxin III; Short=Fd III; Flags: Precursor	Fer2
Solyc09g007020.2	146.949	161.492	152.42	1475.68	1017.77	1123.23	153.62	1205.56	-2.9721	2.77007e-29	2.19828e-27	-	9	685115	691709	+	1467	protein_coding	- && P04284.2 RecName: Full=Pathogenesis-related leaf protein 6; Short=P6; AltName: Full=Ethylene-induced protein P1; AltName: Full=P14; AltName: Full=P14A; AltName: Full=PR protein; Flags: Precursor	SCP
Solyc08g077330.3	1063.48	994.346	1138.6	14.1529	5.69648	39.2604	1065.48	19.7033	5.75804	3.09013e-29	2.44394e-27	-	8	61343975	61345673	-	1168	protein_coding	- && Q850K7.2 RecName: Full=Expansin-like B1; AltName: Full=Expansin-related 1; AltName: Full=OsEXLB1; AltName: Full=OsEXPR1; AltName: Full=OsaEXPb3.1; Flags: Precursor	-
Solyc02g069690.1	99.0547	109.693	149.391	2617.35	1575.08	1219.94	119.38	1804.12	-3.91708	3.75602e-29	2.96051e-27	-	2	40091524	40093167	-	1644	protein_coding	- && O64743.1 RecName: Full=Berberine bridge enzyme-like 15; Short=AtBBE-like 15; AltName: Full=Protein EMBRYO SAC DEVELOPMENT ARREST 28; AltName: Full=Protein MATERNAL EFFECT EMBRYO ARREST 23; Flags: Precursor	FAD_binding_4
Solyc01g057000.3	1055.86	998.409	1683.68	100.958	50.3189	78.5207	1245.98	76.5991	4.02377	4.53366e-29	3.56137e-27	-	1	57890470	57892714	+	1393	protein_coding	- && Q8LGG8.2 RecName: Full=Universal stress protein A-like protein	Usp
Solyc02g082920.3	3580.12	3613.77	3263.39	253.809	518.38	321.744	3485.76	364.644	3.25692	7.95227e-29	6.2258e-27	CHI3	2	47106241	47107335	+	961	protein_coding	Acidic 26 kDa endochitinase [Source:UniProtKB/Swiss-Prot;Acc:Q05539] && Q05539.1 RecName: Full=Acidic 26 kDa endochitinase; Flags: Precursor	-
Solyc01g006930.3	490.919	600.264	589.49	2561.68	2553.92	2530.86	560.225	2548.82	-2.18547	9.64019e-29	7.52193e-27	-	1	1503975	1510963	+	3186	protein_coding	- && Q8LFU0.2 RecName: Full=Nuclear transcription factor Y subunit A-10; Short=AtNF-YA-10	CBFB_NFYA
Solyc04g054950.3	2491.61	2084.17	2467.99	279.285	178.49	119.696	2347.92	192.49	3.60833	1.03412e-28	8.04192e-27	-	4	53423081	53424590	-	1040	protein_coding	- && P50165.1 RecName: Full=Tropinone reductase homolog; AltName: Full=P29X	adh_short
Solyc01g098100.2	2309.82	3121.17	2297.4	321.743	412.995	433.779	2576.13	389.506	2.72557	1.20232e-28	9.31874e-27	-	1	88576838	88577627	+	790	protein_coding	- && A4QND5.1 RecName: Full=60S ribosome subunit biogenesis protein NIP7 homolog	-
Solyc11g007020.2	9925.06	9193.9	9800.28	1520.02	1955.79	1147.17	9639.75	1541	2.64511	1.46512e-28	1.13179e-26	-	11	1509821	1516539	+	2355	protein_coding	Diphosphomevalonate decarboxylase [Source:UniProtKB/TrEMBL;Acc:A8WBX7] && F4JCU3.1 RecName: Full=Diphosphomevalonate decarboxylase MVD2; AltName: Full=Mevalonate 5-diphosphate decarboxylase; Short=AtMVD2	GHMP_kinases
Solyc00g174330.3	5028.93	5460.27	5930.23	48.12	204.124	31.5998	5473.15	94.6145	5.8541	1.47787e-28	1.13786e-26	-	SL3.00SC0001628	136	1683	-	499	protein_coding	Pathogenesis-related protein 1 && Q04108.1 RecName: Full=Pathogenesis-related leaf protein 4; Short=P4; Flags: Precursor	-
Solyc04g009180.2	269.951	215.323	259.416	2710.76	1554.19	2117.19	248.23	2127.38	-3.09954	1.58629e-28	1.21731e-26	-	4	2686905	2688461	+	798	protein_coding	- && Q9FMX2.1 RecName: Full=Transcription factor TCP7	TCP
Solyc04g007170.3	2620.05	2952.57	2865.69	224.56	139.564	338.98	2812.77	234.368	3.58526	1.77207e-28	1.3554e-26	-	4	873574	875922	+	2137	protein_coding	- && Q9LUA2.1 RecName: Full=Ethylene-responsive transcription factor ERF119	AP2
Solyc09g008020.3	3331.94	3375.09	2934.33	811.435	758.581	716.262	3213.79	762.093	2.07619	1.97736e-28	1.50746e-26	-	9	1498029	1504377	+	2508	protein_coding	- && -	OTU
Solyc08g005560.3	508.336	452.991	618.763	4263.81	2803.62	3577.48	526.697	3548.3	-2.75202	2.25638e-28	1.71455e-26	-	8	408462	420927	+	2416	protein_coding	- && Q41224.1 RecName: Full=Ubiquinol oxidase 1, mitochondrial; AltName: Full=Alternative oxidase 1; Flags: Precursor	AOX
Solyc02g088100.3	452.821	497.681	700.525	18.8706	4.74707	16.2787	550.342	13.2988	5.37094	2.6089e-28	1.97597e-26	-	2	50926769	50928715	-	1664	protein_coding	Expansin [Source:UniProtKB/TrEMBL;Acc:Q9ZP31] && Q9LDR9.1 RecName: Full=Expansin-A10; Short=AtEXPA10; AltName: Full=Alpha-expansin-10; Short=At-EXP10; Short=AtEx10; AltName: Full=Ath-ExpAlpha-1.1; Flags: Precursor	-
Solyc10g074870.2	2506.85	2643.8	2241.88	377.411	484.201	318.871	2464.18	393.494	2.64664	3.20716e-28	2.4212e-26	-	10	58638800	58647324	+	1420	protein_coding	- && Q8GYR4.1 RecName: Full=KH domain-containing protein At3g08620; AltName: Full=Quaking-like protein 4	-
Solyc05g005520.1	299.341	172.665	202.89	2021.98	1680.46	2302	224.965	2001.48	-3.15415	4.57402e-28	3.44192e-26	-	5	371723	372181	+	459	protein_coding	- && -	-
Solyc08g062960.3	34.8324	29.4546	29.2726	388.734	525.026	582.203	31.1866	498.654	-4.00024	4.88997e-28	3.66779e-26	-	8	52442803	52445981	-	2433	protein_coding	Heat stress transcription factor A-2 [Source:Projected from Arabidopsis thaliana (AT2G26150) UniProtKB/Swiss-Prot;Acc:O80982] && P41152.1 RecName: Full=Heat shock factor protein HSF30; AltName: Full=Heat shock transcription factor 30; Short=HSTF 30; AltName: Full=Heat stress transcription factor	HSF_DNA-bind
Solyc10g079710.2	366.829	299.624	461.296	2280.51	2230.17	2527.99	375.917	2346.22	-2.64176	5.8921e-28	4.40525e-26	-	10	61332080	61344457	+	2452	protein_coding	- && O80366.1 RecName: Full=Two-component response regulator ARR9; AltName: Full=Response reactor 4	Response_reg
Solyc03g005640.1	58.7797	39.6114	86.8085	1560.6	844.978	1027.47	61.7332	1144.35	-4.21194	6.01172e-28	4.48027e-26	-	3	457650	459020	+	1371	protein_coding	- && -	-
Solyc04g007030.3	1590.32	1467.65	1342.5	27682.2	11507.8	13598.5	1466.82	17596.2	-3.58452	7.21683e-28	5.3612e-26	-	4	742397	747898	-	3640	protein_coding	- && Q6L3N7.1 RecName: Full=Putative late blight resistance protein homolog R1C-3	NB-ARC
Solyc11g011500.2	70.7533	37.58	86.8085	2110.67	2327.96	862.771	65.0473	1767.14	-4.76401	7.31016e-28	5.41324e-26	-	11	4549082	4556342	+	3047	protein_coding	- && Q9M8S6.1 RecName: Full=Potassium channel SKOR; AltName: Full=Stelar K(+) outward rectifying channel	Ion_trans
Solyc04g015220.3	335.262	432.678	305.849	18481.8	4448	7199.97	357.929	10043.3	-4.81038	7.49426e-28	5.53195e-26	-	4	5406932	5412127	-	2876	protein_coding	- && Q6L400.1 RecName: Full=Putative late blight resistance protein homolog R1B-16	NB-ARC
Solyc03g043900.1	2075.79	2395.98	1812.88	300.042	350.333	223.114	2094.89	291.163	2.8469	9.2741e-28	6.82409e-26	-	3	7629948	7630559	-	612	protein_coding	- && Q9LZP8.1 RecName: Full=bZIP transcription factor 53; Short=AtbZIP53	bZIP_1
Solyc08g006330.3	1300.77	1317.33	1629.17	209.463	239.252	170.447	1415.76	206.388	2.77813	9.73575e-28	7.14119e-26	-	8	990129	995279	-	3480	protein_coding	- && Q6VAA6.1 RecName: Full=UDP-glycosyltransferase 74G1	UDPGT
Solyc12g089300.2	286.279	349.392	302.82	9.43529	9.49413	5.74542	312.831	8.22495	5.24844	1.02693e-27	7.5089e-26	-	12	65418484	65419994	-	413	protein_coding	- && P46689.2 RecName: Full=Gibberellin-regulated protein 1; AltName: Full=GAST1 protein homolog 1; Flags: Precursor	-
Solyc01g060020.3	2165.05	2045.57	2693.08	222.673	270.583	123.527	2301.24	205.594	3.48444	1.10669e-27	8.06669e-26	-	1	69340218	69345249	-	1116	protein_coding	- && Q01413.1 RecName: Full=Glucan endo-1,3-beta-glucosidase B; AltName: Full=(1->3)-beta-glucan endohydrolase B; Short=(1->3)-beta-glucanase B; AltName: Full=Basic beta-1,3-glucanase; AltName: Full=Beta-1,3-endoglucanase B; Flags: Precursor	Glyco_hydro_17
Solyc02g093670.3	0	3.04703	0	1049.2	714.908	1006.41	1.01568	923.506	-9.80116	1.14652e-27	8.33092e-26	-	2	55069147	55072559	+	2363	protein_coding	- && -	-
Solyc07g063620.3	8.7081	14.2195	9.08461	384.016	466.162	291.101	10.6707	380.426	-5.15326	1.1597e-27	8.37771e-26	-	7	66175690	66178222	+	1366	protein_coding	- && -	-
Solyc01g005500.3	2308.74	1976.5	1928.97	197.198	91.1437	69.9026	2071.4	119.415	4.11626	1.16017e-27	8.37771e-26	-	1	344744	346673	+	1237	protein_coding	- && Q94KL8.1 RecName: Full=Secoisolariciresinol dehydrogenase	adh_short
Solyc06g009140.3	9490.75	8742.94	8903.93	1759.68	1089.93	1697.77	9045.87	1515.79	2.57718	1.22556e-27	8.82249e-26	-	6	3087883	3094001	+	1352	protein_coding	- && Q93WF6.1 RecName: Full=Protein SENESCENCE-ASSOCIATED GENE 21, mitochondrial; AltName: Full=Late embryogenensis abundant like 5; Short=AtLEA5; Flags: Precursor	-
Solyc03g121510.3	69.6648	144.226	152.42	1861.58	1307.34	1640.32	122.103	1603.08	-3.71321	1.5081e-27	1.08229e-25	-	3	71083006	71086480	-	1937	protein_coding	CYP90D1 [Source:Projected from Arabidopsis thaliana (AT3G13730) UniProtKB/TrEMBL;Acc:A0A178VDZ8] && Q94IA6.1 RecName: Full=3-epi-6-deoxocathasterone 23-monooxygenase; AltName: Full=Cytochrome P450 90D1	p450
Solyc11g072630.2	2725.64	2768.73	2659.77	425.531	300.015	210.665	2718.05	312.07	3.1225	1.55229e-27	1.11058e-25	-	11	56155783	56166404	+	4324	protein_coding	Mitogen-activated protein kinase [Source:UniProtKB/TrEMBL;Acc:E2GLN8] && Q40531.1 RecName: Full=Mitogen-activated protein kinase homolog NTF6; AltName: Full=P43	Pkinase
Solyc01g096430.3	1333.43	1205.61	1744.25	215.125	183.237	154.169	1427.76	184.177	2.95452	2.20363e-27	1.57174e-25	-	1	87400194	87400552	-	216	protein_coding	- && -	-
Solyc07g052370.3	5731.02	6653.69	5746.52	534.037	266.785	149.381	6043.74	316.734	4.25399	2.22437e-27	1.58169e-25	-	7	61011322	61013390	+	1616	protein_coding	- && A6YIH8.1 RecName: Full=Premnaspirodiene oxygenase; Short=HPO; AltName: Full=Cytochrome P450 71D55	p450
Solyc03g080150.3	23.9473	52.8151	15.141	1930.46	1598.81	656.893	30.6345	1395.39	-5.5084	2.62312e-27	1.85954e-25	-	3	53478370	53479688	+	998	protein_coding	Peroxidase [Source:UniProtKB/TrEMBL;Acc:K4BHZ1] && A7QEU4.2 RecName: Full=Peroxidase 5; Flags: Precursor	-
Solyc07g005380.3	3761.9	3713.31	3522.81	371.75	243.999	121.611	3666.01	245.787	3.89858	3.06034e-27	2.16289e-25	-	7	290986	292561	+	869	protein_coding	- && -	-
Solyc01g073830.1	29.3899	30.4703	35.329	587.818	846.877	417.501	31.7297	617.399	-4.2816	3.2656e-27	2.30096e-25	-	1	81065372	81066304	-	933	protein_coding	- && -	C1_3
Solyc01g087840.3	1713.32	1661.65	1184.03	239.656	183.237	199.175	1519.66	207.356	2.87345	3.34166e-27	2.34744e-25	-	1	82589627	82592284	+	2658	protein_coding	- && Q9ZUF6.1 RecName: Full=Subtilisin-like protease SBT1.8; AltName: Full=Subtilase subfamily 1 member 8; Short=AtSBT1.8; Flags: Precursor	-
Solyc09g090430.3	12564.7	13567.4	13583.5	2453.17	2646.96	3479.81	13238.5	2859.98	2.21068	4.0506e-27	2.83688e-25	-	9	70425958	70430320	-	854	protein_coding	Cyanate hydratase [Source:Projected from Arabidopsis thaliana (AT3G23490) UniProtKB/TrEMBL;Acc:A0A178VD28] && B7FKW7.1 RecName: Full=Cyanate hydratase; Short=Cyanase; AltName: Full=Cyanate hydrolase; AltName: Full=Cyanate lyase	Cyanate_lyase
Solyc04g071900.3	108543	109047	108586	6567.9	16134.3	10071.7	108726	10924.7	3.31503	4.16153e-27	2.90583e-25	-	4	58999031	59008663	+	2151	protein_coding	- && Q96520.1 RecName: Full=Peroxidase 12; Short=Atperox P12; AltName: Full=ATP4a; AltName: Full=PRXR6; Flags: Precursor	-
Solyc03g116890.3	1503.24	1431.09	1971.36	108.506	29.4318	78.5207	1635.23	72.1528	4.5022	4.50479e-27	3.13609e-25	-	3	67623408	67626540	-	2137	protein_coding	- && Q9SAH7.1 RecName: Full=Probable WRKY transcription factor 40; AltName: Full=WRKY DNA-binding protein 40	WRKY
Solyc11g018530.2	0	0	0	3014.57	2029.85	1138.55	0	2060.99	-13.399	4.53545e-27	3.14801e-25	-	11	8645242	8648856	-	1131	protein_coding	- && Q8H4H5.1 RecName: Full=Metal transporter Nramp5	-
Solyc06g073760.3	1027.56	1139.59	1133.56	30.1929	79.7507	24.8968	1100.23	44.9468	4.61334	5.02122e-27	3.4748e-25	-	6	45657115	45661920	+	2487	protein_coding	- && A7LXU3.1 RecName: Full=Beta-glucosidase BoGH3B; AltName: Full=Glycosyl hydrolase family protein 3B; Short=BoGH3B; Flags: Precursor	Glyco_hydro_3
Solyc10g082000.2	9.79662	11.1724	23.2162	354.767	524.076	507.512	14.7284	462.118	-4.96675	5.48848e-27	3.78689e-25	-	10	63033261	63037826	-	3316	protein_coding	- && Q9SVD0.1 RecName: Full=Protein SMAX1-LIKE 3; Short=AtSMXL3	-
Solyc07g056410.3	1013.41	713.004	799.446	24.5317	54.1166	61.2845	841.952	46.6443	4.17434	6.30159e-27	4.33505e-25	-	7	64399436	64408112	-	7968	protein_coding	- && Q9SHI2.2 RecName: Full=Leucine-rich repeat receptor-like serine/threonine-protein kinase At1g17230; Flags: Precursor	Pkinase
Solyc01g108700.3	0	0	0	2094.63	1236.14	1664.26	0	1665.01	-13.0912	7.27935e-27	4.9929e-25	-	1	95833159	95833662	+	504	protein_coding	- && -	-
Solyc02g087410.3	1054.77	818.635	817.615	60.3858	21.8365	56.4966	897.006	46.2397	4.27785	8.89152e-27	6.08076e-25	-	2	50491674	50497951	-	4089	protein_coding	- && Q9LHD1.1 RecName: Full=ABC transporter B family member 15; Short=ABC transporter ABCB.15; Short=AtABCB15; AltName: Full=Multidrug resistance protein 13; AltName: Full=P-glycoprotein 15	ABC_membrane
Solyc02g070910.2	2202.06	2346.21	2617.38	579.327	571.547	562.094	2388.55	570.989	2.06464	9.0736e-27	6.18708e-25	-	2	41056266	41068536	+	7552	protein_coding	- && Q9FL28.1 RecName: Full=LRR receptor-like serine/threonine-protein kinase FLS2; AltName: Full=Protein FLAGELLIN-SENSING 2; AltName: Full=Protein FLAGELLIN-SENSITIVE 2; Flags: Precursor	Pkinase
Solyc11g011180.2	951.36	1141.62	1225.41	56.6117	12.3424	44.0482	1106.13	37.6674	4.87597	9.23721e-27	6.28022e-25	-	11	4245193	4249160	-	3255	protein_coding	- && -	LRRNT_2
Solyc02g062890.2	218.791	173.681	243.266	6019.71	1760.21	4858.71	211.912	4212.88	-4.31329	1.05823e-26	7.17377e-25	-	2	35380590	35382942	-	1746	protein_coding	- && Q8GXR2.2 RecName: Full=Probable polyol transporter 6	Sugar_tr
Solyc02g084440.3	427.786	732.302	577.378	9.43529	12.3424	28.7271	579.155	16.8349	5.10577	1.40614e-26	9.50452e-25	-	2	48088455	48090998	-	1555	protein_coding	- && Q944G9.2 RecName: Full=Fructose-bisphosphate aldolase 2, chloroplastic; Short=AtFBA2; Flags: Precursor	-
Solyc04g077120.3	320.023	293.53	370.45	2215.41	1749.77	2803.77	328.001	2256.31	-2.78211	1.46324e-26	9.86181e-25	-	4	62156255	62164026	+	3303	protein_coding	Inositol-tetrakisphosphate 1-kinase 3 [Source:Projected from Arabidopsis thaliana (AT4G08170) UniProtKB/Swiss-Prot;Acc:Q9SUG3] && Q9SUG3.2 RecName: Full=Inositol-tetrakisphosphate 1-kinase 3; AltName: Full=Inositol 1,3,4-trisphosphate 5/6-kinase 3; Short=AtItpk-3; Short=Inositol-triphosphate 5/6-kinase 3; Short=Ins(1,3,4)P(3) 5/6-kinase 3	-
Solyc02g070430.3	1453.16	1189.36	1368.75	0	0	0	1337.09	0	12.9013	1.48579e-26	9.98483e-25	-	2	40724642	40726767	-	1367	protein_coding	- && Q9XG83.1 RecName: Full=Gibberellin 2-beta-dioxygenase; AltName: Full=GA 2-oxidase; AltName: Full=Gibberellin 2-beta-hydroxylase; AltName: Full=Gibberellin 2-oxidase	2OG-FeII_Oxy
Solyc08g067370.1	3733.6	3620.88	3593.47	285.889	594.333	430.907	3649.32	437.043	3.06181	1.55523e-26	1.04214e-24	-	8	56478064	56479362	-	1299	protein_coding	- && -	-
Solyc02g069200.2	0	0	0	3536.35	1790.59	1057.16	0	2128.03	-13.4452	1.56887e-26	1.04826e-24	-	2	39726725	39731826	-	2422	protein_coding	- && Q38856.2 RecName: Full=Fe(2+) transport protein 1; AltName: Full=Fe(II) transport protein 1; AltName: Full=Iron-regulated transporter 1; Flags: Precursor	-
Solyc12g087950.1	1482.55	2011.04	1516.12	180.214	152.856	256.629	1669.9	196.566	3.08683	1.68982e-26	1.12584e-24	-	12	64432737	64433537	-	801	protein_coding	AT-hook motif nuclear-localized protein [Source:UniProtKB/TrEMBL;Acc:K4DGL6] && Q9LTA2.1 RecName: Full=AT-hook motif nuclear-localized protein 17	-
Solyc01g080910.2	986.193	975.049	1009.4	99.0705	126.272	157.999	990.214	127.781	2.95428	1.70502e-26	1.13272e-24	-	1	80103755	80105029	+	1275	protein_coding	- && -	-
Solyc02g077590.1	466.972	398.145	439.09	22.6447	8.54472	8.61813	434.736	13.2692	5.03264	1.79485e-26	1.189e-24	-	2	43046175	43046714	-	540	protein_coding	Homeobox-leucine zipper protein ATHB-52 [Source:Projected from Arabidopsis thaliana (AT5G53980) UniProtKB/Swiss-Prot;Acc:Q9FN29] && Q9FN29.1 RecName: Full=Homeobox-leucine zipper protein ATHB-52; AltName: Full=HD-ZIP protein ATHB-52; AltName: Full=Homeodomain transcription factor ATHB-52	Homeobox
Solyc01g097270.3	78995.6	81232.7	81473.8	8212.47	14370.3	6871.52	80567.4	9818.11	3.03668	1.88878e-26	1.24767e-24	-	1	88055015	88059535	-	1482	protein_coding	Hevein-like preproprotein [Source:Projected from Arabidopsis thaliana (AT3G04720) UniProtKB/Swiss-Prot;Acc:P43082] && P09762.1 RecName: Full=Wound-induced protein WIN2; Flags: Precursor	-
Solyc01g091950.3	995.989	923.249	957.922	6338.63	4005.57	5821.07	959.053	5388.42	-2.49022	2.24757e-26	1.48047e-24	-	1	85356995	85373249	+	2526	protein_coding	Lysophospholipid acyltransferase LPEAT2 [Source:Projected from Arabidopsis thaliana (AT2G45670) UniProtKB/Swiss-Prot;Acc:Q8S8S2] && Q8S8S2.1 RecName: Full=Lysophospholipid acyltransferase LPEAT2; AltName: Full=Lysophosphatidylethanolamine acyltransferase 2; Short=AtLPEAT2	K-box
Solyc10g018200.2	0	0	0	2773.03	905.74	2259.87	0	1979.55	-13.3409	2.26432e-26	1.48728e-24	-	10	7215030	7217656	-	1789	protein_coding	- && -	-
Solyc01g102940.3	358.121	272.201	296.764	3653.34	3753.98	1868.22	309.029	3091.85	-3.32292	2.29561e-26	1.50359e-24	-	1	91468949	91476519	+	3735	protein_coding	Methionine S-methyltransferase [Source:UniProtKB/TrEMBL;Acc:K4B1M0] && Q9SWR3.1 RecName: Full=Methionine S-methyltransferase; AltName: Full=AdoMet:Met S-methyltransferase	Aminotran_1_2
Solyc05g056545.1	396.219	355.486	329.065	4519.5	2367.84	2661.09	360.257	3182.81	-3.14337	2.32082e-26	1.51584e-24	-	5	66657181	66659114	-	878	protein_coding	- && Q7U1B9.1 RecName: Full=Alcohol dehydrogenase B >P9WQC6.1 RecName: Full=Alcohol dehydrogenase B >P9WQC7.1 RecName: Full=Alcohol dehydrogenase B	ADH_N
Solyc10g081390.1	14.1507	0	6.05641	618.011	822.192	490.276	6.73569	643.493	-6.59428	2.54146e-26	1.6553e-24	-	10	62595431	62597128	+	237	protein_coding	- && -	-
Solyc06g071500.3	1993.07	2092.29	1669.55	8880.49	7856.39	7261.25	1918.3	7999.38	-2.06009	2.70704e-26	1.75821e-24	-	6	44162809	44167957	+	2968	protein_coding	- && Q9M1P7.1 RecName: Full=Probable boron transporter 2	-
Solyc08g061270.1	425.609	430.646	461.296	33.0235	31.3306	42.1331	439.184	35.4957	3.62942	2.77363e-26	1.79645e-24	-	8	48516630	48516980	-	351	protein_coding	- && -	-
Solyc08g075830.3	0	0	0	3062.69	2412.46	822.553	0	2099.24	-13.4256	3.47119e-26	2.242e-24	-	8	60041368	60043161	+	1493	protein_coding	Peroxidase [Source:UniProtKB/TrEMBL;Acc:K4CMV0] && Q43735.1 RecName: Full=Peroxidase 27; Short=Atperox P27; AltName: Full=ATP12a; AltName: Full=PRXR7; Flags: Precursor	-
Solyc01g005470.3	8250.93	8158.92	7975.28	1974.81	1820.03	1334.85	8128.38	1709.89	2.24903	4.06648e-26	2.61922e-24	-	1	322539	324960	-	867	protein_coding	- && Q9LQU4.1 RecName: Full=Protein PLANT CADMIUM RESISTANCE 2; Short=AtPCR2	-
Solyc05g032630.1	543.168	477.368	431.014	0.943529	0	2.87271	483.85	1.27208	8.57638	4.14779e-26	2.66421e-24	-	5	46616035	46616331	-	297	protein_coding	- && -	-
novel.401	238.384	358.534	370.45	6.6047	7.59531	10.5333	322.456	8.24443	5.29062	4.28101e-26	2.7422e-24	-	2	31025865	31040601	-	705	-	- && - && -	-
novel.783	18.5047	38.5957	34.3196	943.529	447.174	739.244	30.4733	709.982	-4.5391	4.80921e-26	3.07208e-24	-	7	59161227	59165302	+	908	-	- && - && -	-
Solyc05g055290.3	29.3899	19.2978	25.235	342.501	566.8	629.124	24.6409	512.808	-4.38112	5.31798e-26	3.38777e-24	-	5	65835262	65839166	-	2005	protein_coding	- && -	-
Solyc01g007260.3	169.808	120.865	132.232	890.691	1156.39	1105.99	140.968	1051.02	-2.89924	5.35118e-26	3.39961e-24	-	1	1819144	1823385	-	3274	protein_coding	- && Q9SVD0.1 RecName: Full=Protein SMAX1-LIKE 3; Short=AtSMXL3	-
Solyc01g087150.3	0	8.12541	4.03761	385.903	691.173	366.749	4.05434	481.275	-6.87198	6.1713e-26	3.90995e-24	-	1	81959569	81967305	+	2177	protein_coding	Protein DETOXIFICATION [Source:UniProtKB/TrEMBL;Acc:K4AYA6] && Q9SYD6.2 RecName: Full=Protein DETOXIFICATION 42; Short=AtDTX42; AltName: Full=Aluminum-activated citrate transporter; AltName: Full=AtMATE; AltName: Full=FRD-like protein; AltName: Full=Multidrug and toxic compound extrusion protein 42; Short=MATE protein 42	MatE
Solyc07g053540.1	118.648	219.386	303.83	3588.24	5335.7	2343.17	213.955	3755.71	-4.13302	6.51936e-26	4.11924e-24	-	7	62088569	62089312	+	744	protein_coding	- && Q9ZWA8.1 RecName: Full=Fasciclin-like arabinogalactan protein 9; Flags: Precursor	-
Solyc09g091600.3	1777.54	1664.69	1816.92	272.68	196.529	323.659	1753.05	264.289	2.72974	6.68259e-26	4.21094e-24	-	9	71321575	71324159	+	1190	protein_coding	- && Q8L730.1 RecName: Full=Protein SULFUR DEFICIENCY-INDUCED 2	TPR_1
Solyc04g079080.2	26.1243	28.4389	22.2068	416.096	656.994	1273.57	25.59	782.219	-4.93413	7.69118e-26	4.83339e-24	-	4	63757069	63760300	+	1121	protein_coding	- && -	efhand
Solyc02g063270.3	3450.59	3294.85	3357.27	694.437	538.317	794.783	3367.57	675.846	2.31696	9.10341e-26	5.70546e-24	-	2	35875464	35878605	-	1542	protein_coding	- && Q9C994.1 RecName: Full=Protein DETOXIFICATION 14; Short=AtDTX14; AltName: Full=Multidrug and toxic compound extrusion protein 14; Short=MATE protein 14	MatE
Solyc08g068770.2	2922.66	3127.27	3031.23	646.317	392.108	484.53	3027.05	507.652	2.57597	1.08035e-25	6.75275e-24	-	8	57962612	57963926	-	773	protein_coding	- && Q9SMB8.1 RecName: Full=Tyramine N-feruloyltransferase 4/11; AltName: Full=Hydroxycinnamoyl-CoA: tyramine N-hydroxycinnamoyltransferase	Acetyltransf_1
Solyc08g079720.3	30.4784	59.9249	31.2914	618.955	955.11	611.887	40.5649	728.651	-4.16537	1.13854e-25	7.09742e-24	-	8	63307279	63324917	-	2924	protein_coding	AT-hook motif nuclear-localized protein [Source:UniProtKB/TrEMBL;Acc:K4CNX2] && O22130.1 RecName: Full=AT-hook motif nuclear-localized protein 22	-
Solyc01g091470.3	682.498	626.672	890.292	3730.71	3489.09	3438.63	733.154	3552.81	-2.27666	1.21475e-25	7.55224e-24	-	1	84975515	84978670	+	3082	protein_coding	AT-hook motif nuclear-localized protein [Source:UniProtKB/TrEMBL;Acc:K4AZ87] && O22130.1 RecName: Full=AT-hook motif nuclear-localized protein 22	-
Solyc11g065620.2	6596.39	7511.94	6919.45	591.593	836.433	1237.18	7009.26	888.402	2.98003	1.2949e-25	8.02905e-24	-	11	51433911	51438753	+	2564	protein_coding	Sulfite reductase [Source:UniProtKB/TrEMBL;Acc:H6WYS2] && O82802.1 RecName: Full=Sulfite reductase 1 [ferredoxin], chloroplastic; Short=NtSiR1; Flags: Precursor	-
Solyc03g112700.1	1706.79	1402.65	1579.71	176.44	81.6495	169.49	1563.05	142.526	3.45504	1.38231e-25	8.54829e-24	-	3	64546475	64547467	-	993	protein_coding	- && -	-
Solyc09g010360.3	242.738	104.615	217.021	1911.59	2158.97	2008.98	188.125	2026.51	-3.42988	1.53345e-25	9.45779e-24	-	9	3740237	3743623	-	2371	protein_coding	WAT1-related protein [Source:UniProtKB/TrEMBL;Acc:K4CR63] && Q9ZUS1.1 RecName: Full=WAT1-related protein At2g37460	DUF6
Solyc01g073810.2	0	0	0	1973.86	1443.11	903.946	0	1440.31	-12.8821	1.98913e-25	1.22358e-23	-	1	81055373	81056169	-	797	protein_coding	- && -	C1_3
Solyc12g097000.2	361.386	320.954	404.77	10.3788	12.3424	2.87271	362.37	8.5313	5.40705	2.0806e-25	1.27646e-23	-	12	66665268	66666499	-	973	protein_coding	- && Q40392.1 RecName: Full=TMV resistance protein N	TIR
Solyc05g006980.3	719.507	821.682	946.818	129.263	115.828	108.205	829.336	117.766	2.81607	2.41306e-25	1.47654e-23	-	5	1561189	1563950	-	1429	protein_coding	- && Q940J1.2 RecName: Full=Homeobox-leucine zipper protein ATHB-16; AltName: Full=HD-ZIP protein ATHB-16; AltName: Full=Homeodomain transcription factor ATHB-16	HALZ
Solyc10g081910.2	572.558	554.559	373.479	2744.73	2825.45	2798.02	500.198	2789.4	-2.47966	2.46281e-25	1.50303e-23	-	10	62977277	62983031	+	3318	protein_coding	- && Q9SIT1.1 RecName: Full=Receptor-like kinase TMK3; AltName: Full=BARK1-like kinase 2; AltName: Full=Leucine-rich repeat receptor-like kinases TMK3; AltName: Full=Transmembrane kinase 3; Flags: Precursor	Pkinase_Tyr
Solyc08g081780.1	0	0	0	1800.25	2644.12	756.48	0	1733.62	-13.1495	2.5745e-25	1.56707e-23	-	8	64863051	64863620	-	570	protein_coding	Dirigent protein [Source:UniProtKB/TrEMBL;Acc:K4CPH4] && P13240.2 RecName: Full=Disease resistance response protein 206; AltName: Full=Dirigent protein PI206; Flags: Precursor	-
Solyc01g111660.3	100.143	66.0189	24.2256	2345.61	4973.03	1302.3	63.4626	2873.64	-5.50249	2.84888e-25	1.72956e-23	-	1	97779722	97781067	+	1108	protein_coding	- && P93004.2 RecName: Full=Aquaporin PIP2-7; AltName: Full=Plasma membrane intrinsic protein 2-7; Short=AtPIP2;7; AltName: Full=Plasma membrane intrinsic protein 3; AltName: Full=Salt stress-induced major intrinsic protein; Contains: RecName: Full=Aquaporin PIP2-7, N-terminally processed	-
Solyc12g007070.2	385.334	340.251	348.243	1750.25	1479.19	1747.57	357.943	1659	-2.21274	4.34107e-25	2.62861e-23	-	12	1499414	1514330	+	1852	protein_coding	Heat stress transcription factor C-1 [Source:Projected from Arabidopsis thaliana (AT3G24520) UniProtKB/Swiss-Prot;Acc:Q9LV52] && Q9LV52.1 RecName: Full=Heat stress transcription factor C-1; Short=AtHsfC1; AltName: Full=AtHsf-08	HSF_DNA-bind
Solyc07g054760.1	5333.71	4781.8	4463.57	113.223	258.24	439.525	4859.7	270.33	4.16819	4.65811e-25	2.81326e-23	-	7	63106436	63106687	-	252	protein_coding	- && -	-
Solyc10g079420.1	6750.96	7013.24	7106.19	1090.72	1464	797.656	6956.79	1117.46	2.63819	4.89518e-25	2.94877e-23	-	10	61086939	61087556	+	618	protein_coding	- && Q9SS31.1 RecName: Full=Probable calcium-binding protein CML36; AltName: Full=Calmodulin-like protein 36	-
Solyc02g091700.3	6328.61	7127	6748.86	350.993	581.041	938.419	6734.82	623.484	3.43328	5.23797e-25	3.14711e-23	-	2	53573900	53576603	-	1078	protein_coding	- && Q9LSK9.1 RecName: Full=Uncharacterized protein At5g65660	-
Solyc01g096720.3	392.953	520.026	517.823	27.3623	8.54472	13.406	476.934	16.4377	4.85797	5.45356e-25	3.2682e-23	-	1	87609845	87612824	-	1612	protein_coding	- && Q94BZ1.1 RecName: Full=Protein ZINC INDUCED FACILITATOR-LIKE 1; AltName: Full=Protein ZIF-LIKE 1	MFS_1
Solyc07g056640.1	317.846	392.051	412.845	1855.92	2366.89	2920.59	374.247	2381.13	-2.66927	5.67913e-25	3.39463e-23	-	7	64580401	64580562	-	162	protein_coding	- && -	-
Solyc09g090010.3	0	0	0	1472.85	3115.02	763.183	0	1783.69	-13.1906	5.75492e-25	3.425e-23	-	9	70058882	70061614	-	1963	protein_coding	- && Q9FL89.1 RecName: Full=Germin-like protein subfamily 1 member 19; Flags: Precursor	-
Solyc03g113580.2	399.484	373.769	308.877	7849.22	2651.71	4442.17	360.71	4981.03	-3.78766	5.7594e-25	3.425e-23	-	3	65148415	65151274	-	1269	protein_coding	- && Q9LMC9.1 RecName: Full=Germin-like protein subfamily T member 2; Flags: Precursor	-
Solyc04g007000.1	107.763	22.3449	52.4889	1288.86	1861.8	2306.79	60.8655	1819.15	-4.90412	5.93144e-25	3.51831e-23	-	4	728940	730058	+	1119	protein_coding	RAV1 [Source:UniProtKB/TrEMBL;Acc:E1U2K4] && Q9ZWM9.1 RecName: Full=AP2/ERF and B3 domain-containing transcription factor RAV1; AltName: Full=Ethylene-responsive transcription factor RAV1; AltName: Full=Protein RELATED TO ABI3/VP1 1	B3
Solyc03g093410.3	189.401	202.119	181.692	6015.94	1590.27	3324.68	191.071	3643.63	-4.25319	6.9292e-25	4.09969e-23	-	3	56123218	56131528	+	3230	protein_coding	- && Q07423.1 RecName: Full=Hexose carrier protein HEX6	Sugar_tr
Solyc06g005070.2	2370.78	2519.89	2861.65	311.364	316.155	143.636	2584.11	257.052	3.32944	8.38695e-25	4.94958e-23	-	6	54144	58359	+	2155	protein_coding	- && Q9SX20.1 RecName: Full=Protein NRT1/ PTR FAMILY 3.1; Short=AtNPF3.1	-
Solyc01g009935.1	0	0	0	2938.15	650.348	1711.18	0	1766.56	-13.1766	9.55596e-25	5.61747e-23	-	1	4464693	4465142	+	450	protein_coding	- && -	Auxin_inducible
Solyc04g072460.3	387.511	376.816	495.616	1887.06	2370.68	2302	419.981	2186.58	-2.38008	9.567e-25	5.61747e-23	-	4	59566898	59570686	+	1405	protein_coding	- && Q39237.2 RecName: Full=Transcription factor TGA1; AltName: Full=DNA-binding protein TGA1a-like protein; AltName: Full=bZIP transcription factor 47; Short=AtbZIP47	bZIP_1
Solyc06g065900.3	1594.67	1601.72	1528.23	374.581	352.232	398.349	1574.88	375.054	2.07008	9.75132e-25	5.71128e-23	-	6	41416009	41420792	+	1076	protein_coding	- && -	-
Solyc01g059965.1	2048.58	3408.61	2011.74	314.195	250.645	171.405	2489.64	245.415	3.34257	9.86388e-25	5.76269e-23	-	1	69321663	69323709	+	1389	protein_coding	Glucan endo-1,3-beta-glucosidase B [Source:UniProtKB/Swiss-Prot;Acc:Q01413] && Q01413.1 RecName: Full=Glucan endo-1,3-beta-glucosidase B; AltName: Full=(1->3)-beta-glucan endohydrolase B; Short=(1->3)-beta-glucanase B; AltName: Full=Basic beta-1,3-glucanase; AltName: Full=Beta-1,3-endoglucanase B; Flags: Precursor	Glyco_hydro_17
Solyc11g011160.1	537.725	574.872	400.732	2492.8	3171.04	3760.38	504.443	3141.41	-2.63876	1.06986e-24	6.23467e-23	-	11	4236001	4237444	-	483	protein_coding	- && Q00423.1 RecName: Full=HMG-Y-related protein A; AltName: Full=Protein SB16A	-
Solyc06g073560.3	116.471	136.101	123.147	952.02	716.807	930.758	125.239	866.529	-2.79022	1.11152e-24	6.46129e-23	-	6	45496443	45500954	-	1829	protein_coding	- && Q9FS88.2 RecName: Full=2-methylacyl-CoA dehydrogenase, mitochondrial; AltName: Full=2-methylbutyryl-CoA deshydrogenase; Short=2MBCD; AltName: Full=Isovaleryl-CoA dehydrogenase 1; Short=St-IVD1; Flags: Precursor	-
Solyc09g066400.2	876.253	1063.41	999.307	0	0	0	979.658	0	12.4526	1.15169e-24	6.67806e-23	-	9	65045779	65047411	-	1555	protein_coding	- && A6YIH8.1 RecName: Full=Premnaspirodiene oxygenase; Short=HPO; AltName: Full=Cytochrome P450 71D55	p450
Solyc01g104110.3	0	0	0	3080.62	1349.12	733.499	0	1721.08	-13.139	1.24666e-24	7.21079e-23	-	1	92470081	92471661	-	1402	protein_coding	- && O23880.1 RecName: Full=13S globulin seed storage protein 2; AltName: Full=Legumin-like protein 2; Contains: RecName: Full=13S globulin seed storage protein 2 acidic chain; Contains: RecName: Full=13S globulin seed storage protein 2 basic chain; Flags: Precursor [Fagopyrum esculentum]	-
Solyc02g083375.1	286.279	383.925	510.757	4195.87	2492.21	3329.47	393.654	3339.18	-3.0841	1.34379e-24	7.75331e-23	-	2	47363951	47364229	+	279	protein_coding	- && -	-
Solyc03g115950.3	95.7891	66.0189	45.4231	690.663	1125.05	1250.59	69.077	1022.1	-3.88907	1.35211e-24	7.76292e-23	-	3	67010679	67012444	+	1571	protein_coding	- && -	-
Solyc04g082830.3	864.279	610.421	643.998	71.7082	77.8519	90.9692	706.233	80.1764	3.13885	1.35213e-24	7.76292e-23	-	4	66450776	66455346	+	1553	protein_coding	- && F4HWB6.1 RecName: Full=Protein PIN-LIKES 1; AltName: Full=Auxin efflux carrier-like protein 1	-
Solyc05g005850.3	0	0	0	1187.9	1351.96	830.213	0	1123.36	-12.5235	1.442e-24	8.25848e-23	-	5	662004	665119	+	1167	protein_coding	WAT1-related protein [Source:UniProtKB/TrEMBL;Acc:K4BWB2] && F4JK59.1 RecName: Full=WAT1-related protein At4g15540	DUF6
Solyc07g008980.3	0	0	0	1772.89	1351.02	732.541	0	1285.48	-12.718	1.66747e-24	9.52629e-23	-	7	4005506	4007106	+	749	protein_coding	- && -	-
Solyc10g079380.2	893.669	1061.38	889.283	0	0	0	948.111	0	12.4054	1.84793e-24	1.05314e-22	-	10	61058706	61061297	+	2048	protein_coding	Heat stress transcription factor B-3 [Source:Projected from Arabidopsis thaliana (AT2G41690) UniProtKB/Swiss-Prot;Acc:O22230] && O22230.1 RecName: Full=Heat stress transcription factor B-3; Short=AtHsfB3; AltName: Full=AtHsf-05	HSF_DNA-bind
Solyc07g054880.3	28.3013	53.8308	8.07521	968.06	3114.08	1311.87	30.0691	1798	-5.90199	2.10016e-24	1.19396e-22	-	7	63186086	63187413	+	1175	protein_coding	Methylketone synthase Ie [Source:UniProtKB/TrEMBL;Acc:E0YCS7] && Q6RYA0.1 RecName: Full=Salicylic acid-binding protein 2; Short=NtSABP2; AltName: Full=Methyl salicylate esterase	-
Solyc12g005720.1	3808.71	3646.28	4135.52	603.858	772.822	421.331	3863.5	599.337	2.68843	2.11611e-24	1.20009e-22	-	12	382639	383361	-	723	protein_coding	- && Q9LRJ9.1 RecName: Full=Cysteine-rich repeat secretory protein 38; Flags: Precursor	-
Solyc01g112190.3	155.657	116.803	68.6393	4581.78	1326.33	2333.6	113.7	2747.23	-4.5955	2.5414e-24	1.43778e-22	-	1	98167670	98171235	+	3096	protein_coding	- && Q7X9B9.3 RecName: Full=Protein NLP2; Short=AtNLP2; AltName: Full=NIN-like protein 2; AltName: Full=Nodule inception protein-like protein 2	RWP-RK
Solyc04g076010.3	998.166	1184.28	1167.88	222.673	188.933	219.284	1116.77	210.297	2.40893	2.62668e-24	1.48242e-22	-	4	61024704	61029375	-	1066	protein_coding	- && -	-
Solyc05g013530.3	269.951	376.816	255.379	4.71764	10.4435	7.66056	300.715	7.60725	5.30552	2.64094e-24	1.48686e-22	-	5	6766777	6767981	+	1096	protein_coding	- && -	-
Solyc11g008200.1	104.497	140.163	77.7239	1608.72	866.814	1286.97	107.461	1254.17	-3.54483	2.67521e-24	1.50088e-22	-	11	2442774	2444588	-	1815	protein_coding	- && -	MFS_1
Solyc10g080910.1	292.81	303.687	393.667	2.83059	0	5.74542	330.055	2.85867	6.85413	2.67876e-24	1.50088e-22	-	10	62209694	62209994	-	189	protein_coding	- && -	-
Solyc07g042170.3	3313.43	3014.53	3429.95	667.075	880.106	753.608	3252.63	766.93	2.08445	3.08823e-24	1.72614e-22	-	7	55305593	55306887	+	1145	protein_coding	- && Q8H395.1 RecName: Full=Protein TIFY 10b; Short=OsTIFY10b; AltName: Full=Jasmonate ZIM domain-containing protein 7; Short=OsJAZ7; AltName: Full=OsJAZ6	Zim
Solyc09g090970.3	36998.6	37936.5	40940.3	7356.69	10900.2	8424.7	38625.1	8893.87	2.11866	3.20652e-24	1.78796e-22	-	9	70821547	70832461	-	1491	protein_coding	- && P17642.1 RecName: Full=Pathogenesis-related protein STH-2	-
Solyc08g007060.3	27.2128	19.2978	92.8649	2573.95	1562.73	1287.93	46.4585	1808.2	-5.28065	3.24476e-24	1.80495e-22	-	8	1627950	1634413	+	3355	protein_coding	- && Q9LQL2.2 RecName: Full=Protein NRT1/ PTR FAMILY 7.3; Short=AtNPF7.3; AltName: Full=Nitrate transporter 1.5	-
Solyc03g005820.3	133.887	245.794	232.162	1938.95	1427.92	1797.36	203.948	1721.41	-3.07643	3.34058e-24	1.85061e-22	-	3	553358	558030	-	1487	protein_coding	- && O49722.2 RecName: Full=Probable purine permease 6; Short=AtPUP6	-
Solyc12g099000.2	7887.37	8715.51	8520.36	2638.11	2770.39	2652.47	8374.41	2686.99	1.64001	3.34275e-24	1.85061e-22	-	12	67298171	67300163	-	1245	protein_coding	- && P43281.1 RecName: Full=S-adenosylmethionine synthase 2; Short=AdoMet synthase 2; AltName: Full=Methionine adenosyltransferase 2; Short=MAT 2	-
Solyc08g014050.2	21.7703	2.03135	12.1128	540.642	1301.65	620.505	11.9715	820.931	-6.10745	3.57879e-24	1.97658e-22	-	8	3658053	3659519	+	1467	protein_coding	Glycosyltransferase [Source:UniProtKB/TrEMBL;Acc:K4CJ38] && Q66PF4.1 RecName: Full=Cinnamate beta-D-glucosyltransferase; AltName: Full=UDP-glucose:cinnamate glucosyltransferase; Short=FaGT2	UDPGT
Solyc10g006850.3	283.013	236.652	411.836	10.3788	5.69648	7.66056	310.501	7.91195	5.29401	4.88993e-24	2.69433e-22	-	10	1276367	1283624	-	2117	protein_coding	ADP-ribosylation factor GTPase-activating protein AGD5 [Source:Projected from Arabidopsis thaliana (AT5G54310) UniProtKB/Swiss-Prot;Acc:Q9FL69] && Q9FL69.1 RecName: Full=Probable ADP-ribosylation factor GTPase-activating protein AGD5; Short=ARF GAP AGD5; AltName: Full=Protein ARF-GAP DOMAIN 5; Short=AtAGD5; AltName: Full=Protein ZIGA3	-
Solyc08g014130.3	1128.79	1100.99	1499.97	16927.8	7085.47	11221.8	1243.25	11745	-3.23982	4.94497e-24	2.71821e-22	-	8	3830314	3840086	+	2516	protein_coding	- && O04973.1 RecName: Full=2-isopropylmalate synthase A; AltName: Full=Alpha-IPM synthase A; AltName: Full=Alpha-isopropylmalate synthase A	HMGL-like
Solyc02g087000.3	564.938	542.371	611.697	2441.85	2264.35	2093.25	573.002	2266.48	-1.98381	5.14812e-24	2.82321e-22	-	2	50196535	50202739	+	3098	protein_coding	Potassium transporter [Source:Projected from Arabidopsis thaliana (AT5G14880) UniProtKB/TrEMBL;Acc:A0A178UBD9] && Q9M7J9.2 RecName: Full=Potassium transporter 8; Short=AtHAK8; Short=AtPOT8	K_trans
Solyc02g091100.3	6910.97	6531.81	6367.3	1422.84	774.721	1105.99	6603.36	1101.19	2.58412	6.47347e-24	3.54167e-22	-	2	53152518	53156307	-	2387	protein_coding	2-hydroxyacyl-CoA lyase [Source:Projected from Arabidopsis thaliana (AT5G17380) UniProtKB/Swiss-Prot;Acc:Q9LF46] && Q9LF46.1 RecName: Full=2-hydroxyacyl-CoA lyase; AltName: Full=2-hydroxyphytanoyl-CoA lyase; Short=2-HPCL; AltName: Full=Oxalyl-CoA decarboxylase	TPP_enzyme_N
Solyc05g010720.3	468.061	668.315	558.199	30.1929	51.2683	51.7088	564.858	44.39	3.67003	8.34987e-24	4.55754e-22	-	5	4916486	4918703	-	1323	protein_coding	- && O04469.1 RecName: Full=Enoyl-CoA delta isomerase 1, peroxisomal; AltName: Full=Delta(3),Delta(2)-enoyl CoA isomerase 1; Short=AtECI1	ECH
Solyc05g014510.3	117.559	123.912	117.091	1030.33	1069.04	686.578	119.521	928.65	-2.95783	8.72275e-24	4.74991e-22	-	5	8365251	8369571	+	2615	protein_coding	- && -	-
Solyc04g080250.3	561.673	596.202	602.613	4431.75	3487.19	2551.92	586.829	3490.29	-2.57229	8.98122e-24	4.87924e-22	-	4	64577933	64580183	+	969	protein_coding	- && Q9STG6.1 RecName: Full=Deoxyuridine 5'-triphosphate nucleotidohydrolase; Short=dUTPase; AltName: Full=dUTP pyrophosphatase; AltName: Full=dUTP-pyrophosphatase-like 1; Short=AtDUT1	-
Solyc02g081170.3	1321.45	1400.62	1308.18	267.962	214.567	294.932	1343.42	259.154	2.37408	9.72585e-24	5.27145e-22	-	2	45788127	45790041	-	1284	protein_coding	Plastid lipid associated protein CHRC [Source:UniProtKB/TrEMBL;Acc:Q0ZPA3] && P80471.2 RecName: Full=Light-induced protein, chloroplastic; AltName: Full=Drought-induced stress protein CDSP-34; Flags: Precursor	-
Solyc06g065100.3	298.253	387.988	381.554	2211.63	1635.84	1882.58	355.931	1910.02	-2.42354	9.91201e-24	5.35986e-22	-	6	40723282	40725428	+	1360	protein_coding	- && P81395.1 RecName: Full=Myb-related protein 330	Myb_DNA-binding
Solyc07g043580.3	536.637	678.471	678.318	44.3459	25.6342	60.3269	631.142	43.4356	3.86139	1.00449e-23	5.41912e-22	-	7	57629899	57634665	+	3200	protein_coding	- && Q8W2F3.1 RecName: Full=Transcription factor PIF4; AltName: Full=Basic helix-loop-helix protein 9; Short=AtbHLH9; Short=bHLH 9; AltName: Full=Phytochrome-interacting factor 4; AltName: Full=Short under red-light 2; AltName: Full=Transcription factor EN 102; AltName: Full=bHLH transcription factor bHLH009	HLH
Solyc01g103530.3	355.944	280.326	366.413	1712.5	1531.4	1962.06	334.228	1735.32	-2.37644	1.17646e-23	6.33217e-22	-	1	92000445	92005559	+	4421	protein_coding	- && O49545.1 RecName: Full=Leucine-rich repeat receptor-like serine/threonine-protein kinase BAM1; AltName: Full=Protein BARELY ANY MERISTEM 1; Flags: Precursor	Pkinase_Tyr
Solyc12g013700.2	759.782	645.97	575.359	3567.48	5930.04	3617.7	660.37	4371.74	-2.72702	1.67243e-23	8.98093e-22	-	12	4542150	4545137	+	1571	protein_coding	- && P24805.1 RecName: Full=Stem-specific protein TSJT1	-
Solyc06g036110.1	536.637	571.825	523.879	39.6282	33.2295	13.406	544.114	28.7546	4.2413	1.89298e-23	1.01418e-21	-	6	25649814	25650560	+	747	protein_coding	- && -	C2
Solyc06g067870.3	0	0	0	2096.52	971.25	648.275	0	1238.68	-12.6645	2.06496e-23	1.10378e-21	-	6	42179471	42184247	-	3570	protein_coding	- && Q945B6.1 RecName: Full=Probable 2-oxoglutarate-dependent dioxygenase AOP1.2	2OG-FeII_Oxy
Solyc07g056260.3	777.198	837.932	881.207	4260.03	3078	3516.2	832.113	3618.08	-2.12029	2.12969e-23	1.13577e-21	-	7	64220617	64247077	-	7006	protein_coding	- && Q9SHJ3.3 RecName: Full=Callose synthase 7; AltName: Full=1,3-beta-glucan synthase; AltName: Full=Protein GLUCAN SYNTHASE-LIKE 7	DUF605
Solyc08g065670.3	93.6121	114.771	75.7051	1882.34	731.048	1515.83	94.6962	1376.41	-3.86148	2.30326e-23	1.22552e-21	-	8	53962124	53964466	+	1799	protein_coding	- && Q9XGZ9.2 RecName: Full=Probable protein phosphatase 2C 72; Short=AtPP2C72	PP2C
Solyc02g080520.3	346.147	616.515	500.663	33.967	23.7353	35.4301	487.775	31.0442	3.9741	2.32948e-23	1.23665e-21	-	2	45286413	45288925	-	1853	protein_coding	- && -	-
Solyc10g075175.1	759.782	923.249	727.778	87.7482	93.9919	48.8361	803.603	76.8587	3.38596	2.4563e-23	1.301e-21	-	10	58952603	58953979	+	762	protein_coding	- && P46643.1 RecName: Full=Aspartate aminotransferase, mitochondrial; AltName: Full=Transaminase A; Flags: Precursor	Aminotran_1_2
Solyc12g005940.2	271.04	227.511	257.397	2929.66	3907.79	1498.6	251.983	2778.68	-3.46313	2.55784e-23	1.3517e-21	-	12	563513	566260	-	1189	protein_coding	- && P07920.1 RecName: Full=1-aminocyclopropane-1-carboxylate oxidase 2; Short=ACC oxidase 2; AltName: Full=Ethylene-forming enzyme; Short=EFE; AltName: Full=Protein GTOMA	2OG-FeII_Oxy
Solyc05g054050.3	0	0	0	1314.34	1287.4	570.712	0	1057.48	-12.4363	2.61151e-23	1.37693e-21	-	5	64876105	64879942	-	1646	protein_coding	- && Q07346.1 RecName: Full=Glutamate decarboxylase; Short=GAD	-
Solyc05g055320.3	0	0	0	1181.3	2025.1	548.688	0	1251.69	-12.6796	2.62036e-23	1.37848e-21	-	5	65848846	65852184	+	3034	protein_coding	Peroxidase [Source:UniProtKB/TrEMBL;Acc:K4C2K8] && A7QEU4.2 RecName: Full=Peroxidase 5; Flags: Precursor	-
Solyc01g079880.3	53562.5	53691.7	51281.6	6226.35	7513.66	11955.3	52845.2	8565.09	2.62524	3.04093e-23	1.59611e-21	-	1	78883463	78887702	-	1227	protein_coding	- && P24805.1 RecName: Full=Stem-specific protein TSJT1	-
Solyc04g014510.3	20.6817	44.6897	13.1222	17477	4341.67	5257.06	26.1646	9025.24	-8.42979	3.17969e-23	1.66518e-21	-	4	4780019	4784330	+	1499	protein_coding	Glutamine synthetase [Source:UniProtKB/TrEMBL;Acc:K4BPV5] && P14656.1 RecName: Full=Glutamine synthetase cytosolic isozyme 1-1; AltName: Full=Glutamate--ammonia ligase GLN1;1; Short=OsGLN1;1; AltName: Full=Glutamine synthetase shoot isozyme; AltName: Full=OsGS1;1	-
Solyc02g081500.3	482.211	499.712	345.215	14.1529	4.74707	21.0665	442.38	13.3222	5.05404	3.37033e-23	1.76105e-21	-	2	45989016	45996332	+	3072	protein_coding	- && P93604.1 RecName: Full=Rust resistance kinase Lr10; AltName: Full=Probable receptor-like serine/threonine-protein kinase LRK10; Flags: Precursor	-
Solyc10g011660.3	844.686	545.418	915.527	6144.26	3970.45	5834.47	768.544	5316.39	-2.79031	3.57518e-23	1.8639e-21	-	10	3888659	3892770	-	2040	protein_coding	- && Q6I581.1 RecName: Full=Jasmonic acid-amido synthetase JAR1; AltName: Full=Auxin-responsive GH3-like protein 5; Short=OsGH3-5; AltName: Full=Indole-3-acetic acid-amido synthetase GH3.5; AltName: Full=Jasmonate-amino acid synthetase JAR1; AltName: Full=Protein JASMONATE RESISTANT 1; Short=OsJAR1	-
Solyc06g073540.3	506.159	476.352	422.939	1939.9	2147.57	1810.77	468.483	1966.08	-2.06946	3.75498e-23	1.95326e-21	-	6	45477054	45482654	+	2826	protein_coding	- && Q9ZVD5.2 RecName: Full=Protein argonaute 4; AltName: Full=Protein OVEREXPRESSOR OF CATIONIC PEROXIDASE 11	Piwi
Solyc06g068460.3	1978.92	1725.63	1914.83	449.12	432.932	342.81	1873.13	408.287	2.1977	3.86002e-23	2.00342e-21	-	6	42550570	42552589	+	1691	protein_coding	- && Q9SAH7.1 RecName: Full=Probable WRKY transcription factor 40; AltName: Full=WRKY DNA-binding protein 40	WRKY
Solyc06g066860.2	148.038	104.615	149.391	3725.05	1425.07	1437.31	134.015	2195.81	-4.03451	3.8823e-23	2.01049e-21	-	6	42166439	42176480	-	1914	protein_coding	- && Q945B6.1 RecName: Full=Probable 2-oxoglutarate-dependent dioxygenase AOP1.2	2OG-FeII_Oxy
Solyc10g006700.1	1230.02	1213.73	1409.12	288.72	298.116	285.356	1284.29	290.73	2.14326	4.00501e-23	2.06943e-21	-	10	1165573	1165941	-	369	protein_coding	- && Q9LSQ6.1 RecName: Full=Calcium-binding protein PBP1; AltName: Full=KIC-related protein 2; AltName: Full=PINOID-binding protein 1	-
Solyc08g079090.3	10.8851	16.2508	57.5359	1261.5	3400.8	886.71	28.2239	1849.67	-6.03116	4.21874e-23	2.17504e-21	-	8	62856357	62860553	+	2598	protein_coding	- && Q9SU40.1 RecName: Full=Monocopper oxidase-like protein SKU5; AltName: Full=Skewed roots; Flags: Precursor	-
Solyc06g074030.1	942.652	1005.52	947.828	152.852	187.034	125.442	965.333	155.109	2.63767	4.30518e-23	2.21469e-21	-	6	45908247	45909041	-	795	protein_coding	- && Q9LXM2.1 RecName: Full=Probable CCR4-associated factor 1 homolog 9	CAF1
Solyc11g031950.1	105.586	96.4892	78.7333	1023.73	1357.66	662.639	93.6028	1014.68	-3.43892	4.64049e-23	2.38191e-21	-	11	24211677	24212561	-	885	protein_coding	- && Q9T0F7.1 RecName: Full=Glucuronoxylan 4-O-methyltransferase 2	-
Solyc10g076600.2	1673.04	1872.91	2026.88	12519.7	7279.15	10610.8	1857.61	10136.6	-2.448	5.01367e-23	2.56779e-21	-	10	59658629	59668921	-	3507	protein_coding	- && Q43776.1 RecName: Full=Lysine--tRNA ligase; AltName: Full=Lysyl-tRNA synthetase; Short=LysRS	tRNA-synt_2
ENSRNA050029954	281.925	334.157	327.046	1996.51	6352.52	4082.12	314.376	4143.72	-3.72024	5.444e-23	2.78206e-21	SSU_rRNA_eukarya	9	40511920	40512047	+	128	rRNA	Eukaryotic small subunit ribosomal RNA && -	-
Solyc10g079860.2	5247.72	5376.99	5444.71	195.31	606.675	204.92	5356.47	335.635	3.99631	5.92552e-23	3.0215e-21	-	10	61458331	61459707	-	1254	protein_coding	- && P36401.1 RecName: Full=Glucan endo-1,3-beta-glucosidase, acidic isoform PR-Q'; AltName: Full=(1->3)-beta-glucan endohydrolase; Short=(1->3)-beta-glucanase; AltName: Full=Beta-1,3-endoglucanase; AltName: Full=PR-35; Flags: Precursor	Glyco_hydro_17
Solyc07g009050.3	0	0	0	1031.28	851.624	646.36	0	843.087	-12.1095	6.26144e-23	3.1858e-21	-	7	4021193	4022547	-	1244	protein_coding	- && -	-
Solyc04g007780.3	800.057	599.249	925.621	0	0	0	774.976	0	12.1144	6.29549e-23	3.19613e-21	-	4	1466585	1468370	+	784	protein_coding	- && Q9SSK5.1 RecName: Full=MLP-like protein 43	-
Solyc04g005670.2	6256.77	5699.97	6331.97	1743.64	1244.68	1521.58	6096.24	1503.3	2.01977	6.41342e-23	3.24891e-21	-	4	443973	446469	+	1730	protein_coding	- && Q84M94.1 RecName: Full=F-box/kelch-repeat protein At1g26930	Kelch_1
Solyc08g065940.3	2047.49	1779.46	1681.66	8007.73	9478.94	13991.1	1836.21	10492.6	-2.51461	6.91916e-23	3.49749e-21	-	8	54359527	54360489	-	963	protein_coding	Zinc finger CCCH domain-containing protein 23 [Source:Projected from Arabidopsis thaliana (AT2G25900) UniProtKB/Swiss-Prot;Acc:O82307] && O82199.1 RecName: Full=Zinc finger CCCH domain-containing protein 20; Short=AtC3H20	-
Solyc01g105880.3	649.842	691.675	728.788	67.9341	87.346	43.0907	690.102	66.1236	3.38337	7.06367e-23	3.56278e-21	-	1	93769605	93794445	+	5792	protein_coding	- && G1JUH1.1 RecName: Full=(-)-camphene/tricyclene synthase, chloroplastic; Short=SlTPS3; AltName: Full=(4S)-limonene synthase; AltName: Full=Myrcene synthase; Flags: Precursor	-
Solyc01g006310.3	0	0	0	1103.93	1074.74	564.009	0	914.224	-12.2263	7.14954e-23	3.59829e-21	-	1	898762	901643	+	1052	protein_coding	Peroxidase [Source:UniProtKB/TrEMBL;Acc:K4ASJ7] && Q42517.1 RecName: Full=Peroxidase N; AltName: Full=Neutral peroxidase; Flags: Precursor	-
Solyc09g030450.3	137.153	110.709	66.6205	1218.1	1576.03	881.922	104.827	1225.35	-3.54827	8.06703e-23	4.05129e-21	-	9	31540703	31544028	+	2855	protein_coding	- && Q9LVM0.1 RecName: Full=Probable inactive receptor kinase At5g58300; Flags: Precursor	Pkinase_Tyr
Solyc05g005090.3	572.558	401.192	376.507	8.49176	21.8365	24.8968	450.085	18.4084	4.61246	9.28198e-23	4.65139e-21	-	5	86910	95610	-	2962	protein_coding	- && Q84JS6.1 RecName: Full=Homeobox protein knotted-1-like 6; AltName: Full=Protein KNAT6	KNOX2
Solyc11g011340.2	253.624	293.53	283.642	1.88706	7.59531	1.91514	276.932	3.79917	6.18744	9.83231e-23	4.91658e-21	-	11	4388156	4391129	+	1531	protein_coding	- && Q6V4H0.1 RecName: Full=8-hydroxygeraniol dehydrogenase; Short=Cr10HGO	ADH_N
Solyc06g050760.1	754.34	909.03	600.594	100.958	71.206	63.1996	754.654	78.4544	3.26564	1.05322e-22	5.25523e-21	-	6	33620675	33621022	-	348	protein_coding	- && P20144.1 RecName: Full=Wound-induced protein 1	-
Solyc03g112030.2	3175.19	2853.03	3174.57	350.049	155.704	102.46	3067.6	202.738	3.91925	1.17249e-22	5.83785e-21	-	3	64056218	64059705	-	1587	protein_coding	- && O04164.1 RecName: Full=Cytochrome P450 71A6, partial [Nepeta racemosa]	p450
Solyc05g053000.1	475.68	513.932	642.989	59.4423	58.8636	70.8602	544.2	63.0554	3.10971	1.27752e-22	6.3472e-21	-	5	64018005	64018946	+	942	protein_coding	AT-hook motif nuclear-localized protein [Source:UniProtKB/TrEMBL;Acc:K4C1Y0] && Q9M2S3.1 RecName: Full=AT-hook motif nuclear-localized protein 15; AltName: Full=AT-hook protein of GA feedback 2	-
Solyc07g006230.1	419.078	474.321	364.394	2834.36	6282.27	3069.97	419.264	4062.2	-3.27634	1.30007e-22	6.44549e-21	-	7	1047333	1047728	-	396	protein_coding	- && -	-
Solyc06g060013.1	91.4351	120.865	181.692	1039.77	1410.83	1907.48	131.331	1452.69	-3.46648	1.30974e-22	6.47958e-21	-	6	38066155	38068640	+	957	protein_coding	- && Q9FQ27.1 RecName: Full=(E,E)-germacrene B synthase	-
Solyc09g010840.1	257.978	270.17	312.914	4.71764	0	3.83028	280.354	2.84931	6.62019	1.3215e-22	6.51424e-21	-	9	4148694	4149776	-	1083	protein_coding	- && O80931.1 RecName: Full=Transcription factor AS1; AltName: Full=Myb-related protein 91; Short=AtMYB91; AltName: Full=Protein ASYMMETRIC LEAVES 1; AltName: Full=Protein PHANTASTICA; Short=AtPHAN	-
Solyc12g096570.1	1154.91	1042.08	1027.57	73.5952	111.081	35.4301	1074.86	73.3689	3.87257	1.32235e-22	6.51424e-21	-	12	66410697	66411053	-	357	protein_coding	- && -	-
Solyc01g099620.3	8880.09	7874.53	7819.83	944.472	615.22	1462.21	8191.49	1007.3	3.02365	1.35051e-22	6.62985e-21	-	1	89679425	89683661	-	2983	protein_coding	Respiratory burst oxidase homolog protein B [Source:Projected from Arabidopsis thaliana (AT1G09090) UniProtKB/Swiss-Prot;Acc:Q9SBI0] && Q948T9.1 RecName: Full=Respiratory burst oxidase homolog protein B; AltName: Full=NADPH oxidase RBOHB; AltName: Full=StRBOHB	FAD_binding_8
Solyc09g074890.1	1747.06	1675.86	1586.78	9242.81	6106.63	7003.67	1669.9	7451.03	-2.15771	1.35152e-22	6.62985e-21	-	9	67124599	67124955	+	357	protein_coding	- && Q945T0.1 RecName: Full=Rapid alkalinization factor; Short=NtRALF; Flags: Precursor	-
Solyc02g065250.2	369.006	280.326	302.82	0	4.74707	0.95757	317.384	1.90155	7.38352	1.5099e-22	7.39119e-21	-	2	36984052	36990886	+	1559	protein_coding	- && Q6RYA0.1 RecName: Full=Salicylic acid-binding protein 2; Short=NtSABP2; AltName: Full=Methyl salicylate esterase	-
Solyc06g060600.2	0	0	0	884.086	774.721	615.718	0	758.175	-11.9563	1.79074e-22	8.74754e-21	-	6	38716872	38722222	-	2519	protein_coding	- && Q9SU39.1 RecName: Full=Probable trehalose-phosphate phosphatase F; Short=AtTPPF; AltName: Full=Trehalose 6-phosphate phosphatase; AltName: Full=Trehalose-phosphate phosphatase 5	-
Solyc04g008110.3	260.155	309.781	344.206	1365.29	1397.54	1506.26	304.714	1423.03	-2.22297	2.12828e-22	1.03746e-20	-	4	1762308	1770551	-	3785	protein_coding	Histidine kinase 4 [Source:Projected from Arabidopsis thaliana (AT2G01830) UniProtKB/Swiss-Prot;Acc:Q9C5U0] && Q9C5U0.1 RecName: Full=Histidine kinase 4; AltName: Full=Arabidopsis histidine kinase 4; Short=AtHK4; AltName: Full=Cytokinin receptor CYTOKININ RESPONSE 1; Short=AtCRE1; Short=Cytokinin receptor CRE1; AltName: Full=Phosphoprotein phosphatase AHK4; AltName: Full=Protein AUTHENTIC HIS-KIN…	Response_reg
Solyc08g082670.3	264.509	248.841	152.42	3281.59	2043.14	1585.74	221.923	2303.49	-3.37609	2.13383e-22	1.03799e-20	-	8	65491367	65507134	+	6432	protein_coding	- && Q0WVN5.2 RecName: Full=Cellulose synthase-like protein G3; Short=AtCslG3	-
Solyc03g121230.3	0	0	0	1913.48	609.523	704.772	0	1075.92	-12.4613	2.14952e-22	1.04344e-20	-	3	70865099	70869928	+	3232	protein_coding	- && O64483.1 RecName: Full=Senescence-induced receptor-like serine/threonine-protein kinase; AltName: Full=FLG22-induced receptor-like kinase 1; Flags: Precursor	Pkinase_Tyr
Solyc02g032860.3	3625.84	3739.72	3456.19	619.898	325.649	625.293	3607.25	523.613	2.78433	2.30093e-22	1.11461e-20	-	2	29913880	29916448	+	1730	protein_coding	- && P92981.2 RecName: Full=5'-adenylylsulfate reductase 2, chloroplastic; AltName: Full=3'-phosphoadenosine-5'-phosphosulfate reductase homolog 43; Short=PAPS reductase homolog 43; Short=Prh-43; AltName: Full=Adenosine 5'-phosphosulfate 5'-adenylylsulfate sulfotransferase 2; Short=APS sulfotransferase 2; AltName: Full=Thioredoxin-independent APS reductase 2; Flags: Precursor	-
Solyc04g079350.1	1317.1	935.437	923.602	140.586	71.206	112.993	1058.71	108.262	3.28954	2.55851e-22	1.23681e-20	-	4	63958267	63959220	+	954	protein_coding	- && -	-
Solyc01g106630.2	127099	131881	127040	42768.3	43241	48429.1	128674	44812.8	1.52173	2.67765e-22	1.29171e-20	-	1	94321306	94324378	-	893	protein_coding	- && P11670.1 RecName: Full=Basic form of pathogenesis-related protein 1; Short=PRP 1; Flags: Precursor	SCP
Solyc01g091190.3	10513.9	10575.2	10214.1	3358.96	3300.16	2687.9	10434.4	3115.67	1.74372	2.89383e-22	1.39311e-20	-	1	84751008	84757878	+	2400	protein_coding	3-phosphoshikimate 1-carboxyvinyltransferase [Source:UniProtKB/TrEMBL;Acc:K4AZ59] && P10748.1 RecName: Full=3-phosphoshikimate 1-carboxyvinyltransferase, chloroplastic; AltName: Full=5-enolpyruvylshikimate-3-phosphate synthase; Short=EPSP synthase; Flags: Precursor	EPSP_synthase
Solyc02g071700.3	40.275	51.7995	63.5923	851.063	588.636	477.827	51.8889	639.176	-3.62126	3.01959e-22	1.45065e-20	-	2	41624176	41637025	+	2585	protein_coding	- && Q9C7N4.1 RecName: Full=GDSL esterase/lipase At1g29670; AltName: Full=Extracellular lipase At1g29670; Flags: Precursor	Lipase_GDSL
Solyc04g007710.3	511.601	554.559	572.331	5883.85	2727.66	3791.98	546.164	4134.5	-2.92025	3.08681e-22	1.47989e-20	-	4	1389747	1396547	-	2021	protein_coding	Mitogen-activated protein kinase [Source:UniProtKB/TrEMBL;Acc:K4BNS8] && Q9LV37.2 RecName: Full=Mitogen-activated protein kinase 9; Short=AtMPK9; Short=MAP kinase 9	Pkinase
Solyc04g054340.1	358.121	437.756	338.149	2113.5	1582.67	1923.76	378.009	1873.31	-2.30901	3.10486e-22	1.48548e-20	-	4	52281532	52281783	+	252	protein_coding	- && -	-
Solyc01g006370.3	1641.48	1478.82	1444.45	4874.27	5808.51	5032.99	1521.58	5238.59	-1.78368	3.19641e-22	1.52614e-20	-	1	983202	1005282	-	6437	protein_coding	Callose synthase 3 [Source:Projected from Arabidopsis thaliana (AT5G13000) UniProtKB/Swiss-Prot;Acc:Q9LXT9] && Q9LXT9.3 RecName: Full=Callose synthase 3; AltName: Full=1,3-beta-glucan synthase; AltName: Full=Protein GLUCAN SYNTHASE-LIKE 12	DUF605
novel.997	27.2128	65.0032	27.2538	854.837	1612.1	599.439	39.8233	1022.13	-4.68042	3.34004e-22	1.59145e-20	-	SL3.00SC0000654	3485	4112	-	530	-	- && - && -	-
Solyc07g066180.2	4.35405	22.3449	23.2162	509.506	572.496	447.185	16.6384	509.729	-4.92976	3.55572e-22	1.69075e-20	-	7	67792031	67794498	+	2391	protein_coding	- && -	NB-ARC
Solyc02g079240.1	0	0	0	1203.94	381.664	1883.54	0	1156.38	-12.5653	3.74376e-22	1.77653e-20	-	2	44406484	44406723	-	240	protein_coding	- && -	-
Solyc01g104950.3	748.897	832.854	745.948	6080.1	5780.03	3220.31	775.9	5026.81	-2.69568	3.93854e-22	1.86515e-20	-	1	93164619	93168894	-	2871	protein_coding	- && A5JTQ3.1 RecName: Full=Beta-xylosidase/alpha-L-arabinofuranosidase 2; AltName: Full=Xylan 1,4-beta-xylosidase/Alpha-L-arabinofuranosidase 2; Short=MsXyl2; Includes: RecName: Full=Beta-xylosidase; AltName: Full=1,4-beta-D-xylan xylohydrolase; AltName: Full=Xylan 1,4-beta-xylosidase; Includes: RecName: Full=Alpha-L-arabinofuranosidase; Short=Arabinosidase; Flags: Precursor	Glyco_hydro_3_C
Solyc03g116110.3	2678.83	3085.62	2957.55	858.611	714.908	798.613	2907.33	790.711	1.8785	3.98735e-22	1.88443e-20	-	3	67106273	67110790	-	1665	protein_coding	- && -	-
Solyc04g007050.3	337.439	276.264	434.043	12755.6	3630.56	4059.14	349.248	6815.09	-4.28637	4.12257e-22	1.94438e-20	-	4	763876	769023	+	3295	protein_coding	- && Q6L3X3.1 PUTATIVE PSEUDOGENE: RecName: Full=Putative late blight resistance protein homolog R1B-8	NB-ARC
Solyc07g065210.3	9.79662	8.12541	18.1692	577.44	714.908	230.774	12.0304	507.707	-5.39678	4.34541e-22	2.04533e-20	-	7	67196553	67202506	-	3576	protein_coding	- && F4JDI6.1 RecName: Full=Kinesin-like protein KIN-12F	Kinesin
Solyc04g025880.3	81.6385	152.351	93.8743	5384.72	970.3	3315.11	109.288	3223.38	-4.88196	4.4529e-22	2.09169e-20	-	4	20449607	20456060	-	2954	protein_coding	- && Q8W4I4.1 RecName: Full=Potassium transporter 6; Short=AtHAK6; Short=AtPOT6	K_trans
Solyc08g014000.3	77.2844	42.6584	69.6487	1967.26	992.137	669.342	63.1972	1209.58	-4.25932	4.70919e-22	2.20762e-20	LOX1.1	8	3511728	3518409	-	3041	protein_coding	Linoleate 9S-lipoxygenase A [Source:UniProtKB/Swiss-Prot;Acc:P38415] && P38415.1 RecName: Full=Linoleate 9S-lipoxygenase A; AltName: Full=Lipoxygenase A	Lipoxygenase
Solyc06g053840.3	715.153	724.177	600.594	2657.92	3006.79	3814	679.975	3159.57	-2.21625	4.71868e-22	2.20762e-20	-	6	36806267	36807586	+	1130	protein_coding	Auxin-responsive protein [Source:UniProtKB/TrEMBL;Acc:G9HPV5] && P33077.2 RecName: Full=Auxin-responsive protein IAA4; AltName: Full=Auxin-induced protein AUX2-11; AltName: Full=Indoleacetic acid-induced protein 4	-
Solyc08g076060.3	819.65	841.995	1065.93	86.8046	26.5836	52.6664	909.191	55.3515	4.03768	4.8932e-22	2.28467e-20	-	8	60233084	60236685	+	2896	protein_coding	- && Q9LW83.2 RecName: Full=G-type lectin S-receptor-like serine/threonine-protein kinase CES101; AltName: Full=Protein CALLUS EXPRESSION OF RBCS 101; Flags: Precursor	Pkinase_Tyr
Solyc10g080410.2	26.1243	24.3762	32.3008	1596.45	374.069	706.687	27.6005	892.402	-5.01454	5.05325e-22	2.35467e-20	-	10	61812197	61820532	-	3402	protein_coding	- && Q6H434.1 RecName: Full=Transcription factor TGAL7; AltName: Full=bZIP transcription factor 70; Short=OsbZIP70	-
Solyc01g087810.2	613.921	550.496	408.808	5.66117	14.2412	28.7271	524.408	16.2098	5.01702	5.11504e-22	2.3787e-20	-	1	82571871	82574409	+	2539	protein_coding	- && Q9FHA4.1 RecName: Full=Subtilisin-like protease SBT1.9; AltName: Full=Subtilase subfamily 1 member 9; Short=AtSBT1.9; Flags: Precursor	Peptidase_S8
Solyc00g050430.3	9365.57	8808.95	9134.07	463.273	1294.05	497.936	9102.86	751.753	3.59798	5.15462e-22	2.39232e-20	-	SL3.00SC0000406	298	3848	+	2603	protein_coding	bHLH transcription factor 073 && Q9LSL1.1 RecName: Full=Transcription factor bHLH93; AltName: Full=Basic helix-loop-helix protein 93; Short=AtbHLH93; Short=bHLH 93; AltName: Full=Transcription factor EN 47; AltName: Full=bHLH transcription factor bHLH093	HLH
Solyc12g008840.2	463.707	551.512	739.891	10075	3490.04	11374	585.037	8313.02	-3.82865	5.46399e-22	2.53085e-20	-	12	2183601	2190744	+	2742	protein_coding	Beta-galactosidase [Source:UniProtKB/TrEMBL;Acc:K4DBX2] && P48981.1 RecName: Full=Beta-galactosidase; AltName: Full=Acid beta-galactosidase; Short=Lactase; AltName: Full=Exo-(1-->4)-beta-D-galactanase; Flags: Precursor	-
Solyc09g007640.3	606.302	492.603	482.494	4210.03	2533.03	2770.25	527.133	3171.1	-2.58895	5.47578e-22	2.53127e-20	-	9	1208349	1209752	+	1404	protein_coding	- && Q9M9Q6.1 RecName: Full=Serine carboxypeptidase-like 50; Flags: Precursor	Peptidase_S10
Solyc02g084930.3	21.7703	45.7054	29.2726	1648.34	412.995	930.758	32.2494	997.366	-4.94912	5.55892e-22	2.5646e-20	-	2	48615653	48619601	+	2485	protein_coding	- && Q09J78.1 RecName: Full=Abscisic acid 8'-hydroxylase 2; Short=ABA 8'-hydroxylase 2; AltName: Full=Cytochrome P450 707A6; AltName: Full=OsABA8ox2	-
Solyc07g009130.3	2268.46	2286.29	2404.39	9285.27	7159.53	7809.94	2319.71	8084.91	-1.80127	5.83745e-22	2.68777e-20	-	7	4107656	4119530	+	4104	protein_coding	Putative inactive cadmium/zinc-transporting ATPase HMA3 [Source:Projected from Arabidopsis thaliana (AT4G30120) UniProtKB/Swiss-Prot;Acc:P0CW77] && Q9SZW4.1 RecName: Full=Cadmium/zinc-transporting ATPase HMA2; AltName: Full=Cadmium/zinc-transporting ATPase 3; AltName: Full=Protein HEAVY METAL ATPASE 2	E1-E2_ATPase
Solyc05g012110.3	936.121	850.121	983.157	4602.53	3711.26	6273.04	923.133	4862.28	-2.39702	6.55387e-22	3.01167e-20	-	5	5316485	5320257	-	1287	protein_coding	- && Q9LMX8.1 RecName: Full=Probable 6-phosphogluconolactonase 1; Short=6PGL 1	-
Solyc02g068380.3	4462.9	4366.39	4875.41	1402.08	1257.02	1081.1	4568.23	1246.73	1.87346	6.67578e-22	3.06164e-20	-	2	38892072	38904693	-	2216	protein_coding	Allantoate deiminase [Source:Projected from Arabidopsis thaliana (AT4G20070) UniProtKB/Swiss-Prot;Acc:O49434] && O49434.2 RecName: Full=Allantoate deiminase; AltName: Full=Allantoate amidohydrolase; Short=AtAAH; Flags: Precursor	Peptidase_M20
Solyc09g008750.1	693.383	818.635	833.766	0	0	1.91514	781.928	0.63838	10.2692	6.6959e-22	3.06482e-20	-	9	2181170	2181778	-	609	protein_coding	- && -	-
Solyc09g010200.3	89.2581	65.0032	27.2538	1192.62	3562.2	1094.5	60.505	1949.77	-5.01159	7.02973e-22	3.2113e-20	-	9	3587964	3589709	-	648	protein_coding	CASP-like protein [Source:UniProtKB/TrEMBL;Acc:K4CR48] && P0DI52.1 RecName: Full=Casparian strip membrane protein 1; Short=MgCASP1 [Erythranthe guttata]	-
Solyc08g075430.3	1146.2	1153.81	1203.21	3599.56	3558.4	3583.23	1167.74	3580.4	-1.61637	7.17516e-22	3.27131e-20	-	8	59684043	59688808	-	4002	protein_coding	- && Q9C6W5.1 RecName: Full=ABC transporter G family member 14; Short=ABC transporter ABCG.14; Short=AtABCG14; AltName: Full=White-brown complex homolog protein 14; Short=AtWBC14	ABC2_membrane
Solyc06g062380.3	31.5669	27.4232	45.4231	542.529	382.614	424.204	34.8044	449.782	-3.69091	7.32741e-22	3.33419e-20	-	6	39460073	39461451	-	1081	protein_coding	- && P27061.1 RecName: Full=Acid phosphatase 1; AltName: Full=Apase-1(1); Flags: Precursor	-
Solyc03g006700.3	7802.46	8948.1	8308.38	2534.32	2243.46	1848.11	8352.98	2208.63	1.91913	7.97251e-22	3.62064e-20	-	3	1259897	1262519	-	1293	protein_coding	Peroxidase [Source:UniProtKB/TrEMBL;Acc:K4BE93] && P15004.1 RecName: Full=Suberization-associated anionic peroxidase 2; AltName: Full=TMP2; Flags: Precursor	-
Solyc08g013930.3	0	0	0	742.557	1810.53	473.997	0	1009.03	-12.3687	8.70512e-22	3.94564e-20	-	8	3397199	3402140	-	1215	protein_coding	Peroxidase [Source:UniProtKB/TrEMBL;Acc:K4CJ27] && Q9FLV5.1 RecName: Full=Probable peroxidase 61; Short=Atperox P61; Flags: Precursor	-
Solyc12g005370.2	0	0	0	466.103	1911.17	753.608	0	1043.63	-12.4173	8.75265e-22	3.95947e-20	-	12	220126	222091	-	1005	protein_coding	Peroxidase [Source:UniProtKB/TrEMBL;Acc:K4DB75] && Q43735.1 RecName: Full=Peroxidase 27; Short=Atperox P27; AltName: Full=ATP12a; AltName: Full=PRXR7; Flags: Precursor	-
Solyc01g098645.1	34.8324	18.2822	38.3573	378.355	494.644	627.208	30.4906	500.069	-4.03661	9.15875e-22	4.13513e-20	-	1	88972237	88975814	-	2908	protein_coding	- && Q3ECP6.1 RecName: Full=GDSL esterase/lipase At1g54790; AltName: Full=Extracellular lipase At1g54790; Flags: Precursor	Lipase_GDSL
Solyc06g005330.3	65.3108	20.3135	46.4325	837.854	1004.48	3202.11	44.0189	1681.48	-5.25712	9.3032e-22	4.19221e-20	-	6	351604	352834	-	1000	protein_coding	- && Q9LX82.1 RecName: Full=Transcription factor MYB48; AltName: Full=Myb-related protein 48; Short=AtMYB48	Myb_DNA-binding
Solyc02g032030.1	0	0	0	867.103	505.088	746.905	0	706.365	-11.8542	9.41548e-22	4.2346e-20	-	2	27793514	27794086	-	573	protein_coding	Dirigent protein [Source:UniProtKB/TrEMBL;Acc:K4B5E9] && Q9C523.1 RecName: Full=Dirigent protein 19; Short=AtDIR19; Flags: Precursor	-
Solyc03g120870.3	1434.66	1596.64	1396	83.9741	205.073	91.9267	1475.77	126.991	3.53866	9.57029e-22	4.29591e-20	-	3	70590012	70591721	-	883	protein_coding	CASP-like protein [Source:UniProtKB/TrEMBL;Acc:K4BMN6] && A7P756.1 RecName: Full=CASP-like protein 3A1; Short=VvCASPL3A1	-
Solyc06g083910.3	0	0	0	1353.02	933.273	412.713	0	899.669	-12.2032	9.59036e-22	4.29663e-20	-	6	49256843	49258681	-	1299	protein_coding	- && P24397.1 RecName: Full=Hyoscyamine 6-dioxygenase; AltName: Full=Hyoscyamine 6-beta-hydroxylase	2OG-FeII_Oxy
Solyc06g069070.1	508.336	553.543	400.732	2.83059	20.8871	15.3211	487.537	13.0129	5.22836	1.00017e-21	4.47229e-20	-	6	42985597	42985881	+	285	protein_coding	- && P86809.1 RecName: Full=Non-specific lipid-transfer protein 2; AltName: Full=Allergen Api g 6.0101; AltName: Allergen=Api g 6	-
Solyc01g068410.3	296.076	361.581	353.29	28.3059	16.14	19.1514	336.982	21.1991	3.99029	1.11907e-21	4.99437e-20	-	1	77478856	77481934	+	1461	protein_coding	- && Q9FFD0.2 RecName: Full=Auxin efflux carrier component 5; Short=AtPIN5	-
Solyc07g049560.3	1543.51	1245.22	1113.37	244.374	224.062	272.907	1300.7	247.114	2.39595	1.20983e-21	5.38907e-20	-	7	59978391	59983029	-	1992	protein_coding	- && Q9ZVN4.1 RecName: Full=Probable tyrosine-protein phosphatase At1g05000	-
Solyc06g063090.3	2285.88	2675.29	2689.05	677.454	491.796	593.693	2550.07	587.648	2.11754	1.24284e-21	5.52551e-20	-	6	39961453	39965746	-	1955	protein_coding	- && Q9LDV4.1 RecName: Full=Alanine aminotransferase 2, mitochondrial; Short=AtAlaAT2; Short=AtAlaATm; AltName: Full=Alanine-2-oxoglutarate aminotransferase 3; Flags: Precursor	Aminotran_1_2
Solyc12g044983.1	1004.7	743.475	673.271	27.3623	9.49413	50.7512	807.148	29.2026	4.78913	1.37398e-21	6.09689e-20	-	12	61305926	61307869	+	1098	protein_coding	- && H2DH18.1 RecName: Full=Cytochrome P450 CYP736A12 [Panax ginseng]	p450
Solyc01g107350.3	203.552	212.276	226.106	946.359	1016.82	947.994	213.978	970.392	-2.18088	1.45532e-21	6.44556e-20	-	1	94808472	94812040	-	2999	protein_coding	- && -	-
Solyc08g081190.3	9103.23	9552.43	9666.03	44600.6	31119.9	33330.1	9440.56	36350.2	-1.94501	1.54753e-21	6.84092e-20	-	8	64382531	64385430	+	882	protein_coding	Plasmamembrane intrinsic protein 15 [Source:UniProtKB/TrEMBL;Acc:V5YN05] && Q08451.1 RecName: Full=Probable aquaporin PIP-type pTOM75; AltName: Full=Ripening-associated membrane protein; Short=RAMP	-
Solyc11g072470.2	225.322	334.157	230.144	6.6047	10.4435	4.78785	263.208	7.2787	5.17596	1.60566e-21	7.08441e-20	-	11	55945280	55947668	-	909	protein_coding	- && Q9LQR0.1 RecName: Full=LOB domain-containing protein 1; AltName: Full=ASYMMETRIC LEAVES 2-like protein 8; Short=AS2-like protein 8	-
Solyc12g010840.2	691.206	692.691	635.923	2183.33	2485.56	2396.8	673.273	2355.23	-1.80666	1.72453e-21	7.59446e-20	-	12	3772925	3778928	+	2279	protein_coding	- && Q05758.2 RecName: Full=Ketol-acid reductoisomerase, chloroplastic; AltName: Full=Acetohydroxy-acid reductoisomerase; AltName: Full=Alpha-keto-beta-hydroxylacyl reductoisomerase; Flags: Precursor	-
Solyc06g035960.3	3299.28	2982.02	3092.81	517.997	352.232	205.878	3124.7	358.702	3.12275	1.7598e-21	7.73514e-20	-	6	25413322	25420937	+	5154	protein_coding	- && Q9SMT7.1 RecName: Full=Oxalate--CoA ligase; AltName: Full=4-coumarate--CoA ligase isoform 8; Short=At4CL8; AltName: Full=4-coumarate--CoA ligase-like 10; AltName: Full=Acyl-activating enzyme 3; AltName: Full=Adenosine monophosphate binding protein 3; Short=AtMPBP3; AltName: Full=Oxalyl-CoA synthetase	-
Solyc08g079020.3	544.257	454.007	528.926	2949.47	2247.26	4084.99	509.063	3093.91	-2.60359	1.78283e-21	7.82158e-20	-	8	62785546	62790939	-	732	protein_coding	- && Q9SU38.1 RecName: Full=Adenine phosphoribosyltransferase 4; Short=AtAPT4	Pribosyltran
Solyc03g082600.3	10535.7	10982.5	11136.7	2209.74	2682.09	3294.04	10885	2728.63	1.99611	1.91159e-21	8.37069e-20	-	3	53952824	53956170	-	1132	protein_coding	CB5-E [Source:Projected from Arabidopsis thaliana (AT5G53560) UniProtKB/TrEMBL;Acc:A0A178USU5] && Q42342.2 RecName: Full=Cytochrome b5 isoform E; Short=AtCb5-E; AltName: Full=Cytochrome b5 isoform 1; AltName: Full=Cytochrome b5 isoform A; Short=AtCb5-A	-
Solyc04g076220.3	3335.2	3392.36	3015.08	444.402	322.801	664.554	3247.55	477.252	2.76658	2.06301e-21	9.01676e-20	-	4	61249700	61251192	+	1389	protein_coding	AT-hook motif nuclear-localized protein [Source:UniProtKB/TrEMBL;Acc:K4BU60] && Q9LTA2.1 RecName: Full=AT-hook motif nuclear-localized protein 17	-
novel.64	318.934	282.358	377.516	3.77411	0	8.61813	326.269	4.13075	6.30606	2.09122e-21	9.1229e-20	-	1	14327084	14337322	-	872	-	- && - && -	-
Solyc10g086640.2	475.68	253.919	436.061	0	0	5.74542	388.553	1.91514	7.67223	2.24766e-21	9.78699e-20	-	10	65538897	65544112	-	3384	protein_coding	- && Q9LZM8.1 RecName: Full=BEL1-like homeodomain protein 9; Short=BEL1-like protein 9; AltName: Full=Protein BELLRINGER; AltName: Full=Protein LARSON; AltName: Full=Protein PENNYWISE; AltName: Full=Protein REPLUMLESS; AltName: Full=Protein VAAMANA	POX
Solyc02g079750.3	9667.08	8424.01	9323.84	2508.84	3070.4	2519.37	9138.31	2699.54	1.75921	2.35827e-21	1.02494e-19	-	2	44752724	44754738	+	1079	protein_coding	- && Q6NQE2.1 RecName: Full=Probable NAD(P)H dehydrogenase (quinone) FQR1-like 1	FMN_red
Solyc05g006860.3	6761.84	7034.57	6430.9	426.475	1016.82	983.425	6742.44	808.907	3.05926	2.73829e-21	1.18788e-19	-	5	1477172	1484503	-	1948	protein_coding	- && Q38879.2 RecName: Full=Thioredoxin H2; Short=AtTrxh2; AltName: Full=Thioredoxin 2; Short=AtTRX2	-
Solyc10g079750.2	588.886	758.71	462.306	2.83059	0	15.3211	603.3	6.05057	6.64252	3.36472e-21	1.45692e-19	-	10	61371310	61375612	-	3836	protein_coding	- && Q9ZVC2.1 RecName: Full=Regulatory protein NPR5; AltName: Full=BTB/POZ domain-containing protein NPR5; AltName: Full=Protein BLADE ON PETIOLE 2	BTB
Solyc01g103050.3	2402.35	2474.19	2137.91	9696.64	7521.25	7833.88	2338.15	8350.59	-1.83653	3.866e-21	1.67086e-19	-	1	91610827	91618031	+	4045	protein_coding	Auxin response factor [Source:UniProtKB/TrEMBL;Acc:K4B1N1] && Q8L7G0.2 RecName: Full=Auxin response factor 1	Auxin_resp
Solyc01g010250.3	273.217	316.891	413.855	0	4.74707	8.61813	334.654	4.45507	6.23466	4.03411e-21	1.74028e-19	-	1	4970117	4972308	-	1094	protein_coding	- && Q6Z4H0.1 RecName: Full=Probable 6-phosphogluconolactonase 2; Short=6PGL 2 >A2YNH4.1 RecName: Full=Probable 6-phosphogluconolactonase 2; Short=6PGL 2	-
Solyc02g086810.1	1190.83	1269.59	1133.56	93.4093	196.529	104.375	1198	131.438	3.18817	4.25864e-21	1.83374e-19	-	2	50064092	50064913	+	822	protein_coding	- && -	-
Solyc02g076880.3	16.3277	21.3292	46.4325	512.336	1299.75	580.287	28.0298	797.457	-4.82753	4.3343e-21	1.86287e-19	-	2	42562067	42565054	-	945	protein_coding	- && F4IC29.1 RecName: Full=Heavy metal-associated isoprenylated plant protein 28; Short=AtHIP28; Flags: Precursor	HMA
Solyc03g113350.3	388.599	365.643	374.488	11830	3122.62	4083.08	376.243	6345.22	-4.07596	4.39864e-21	1.88703e-19	-	3	64983279	64991327	+	5502	protein_coding	- && F4HVS0.1 RecName: Full=Zinc finger protein BRUTUS-like At1g74770	zf-CHY
Solyc02g069490.3	53.3371	94.4578	56.5265	641.6	2851.09	1556.05	68.1072	1682.91	-4.62643	4.41181e-21	1.8892e-19	-	2	39925287	39928562	-	2148	protein_coding	Sterol side chain reductase [Source:UniProtKB/TrEMBL;Acc:A0A0C6G3Q8] && Q39085.2 RecName: Full=Delta(24)-sterol reductase; AltName: Full=Cell elongation protein DIMINUTO; AltName: Full=Cell elongation protein Dwarf1; AltName: Full=Protein CABBAGE1; AltName: Full=Protein ENHANCED VERY-LOW-FLUENCE RESPONSE 1	FAD_binding_4
Solyc05g014300.1	783.729	783.086	661.158	118.885	75.0036	111.078	742.658	101.655	2.86894	4.44954e-21	1.90185e-19	-	5	8101967	8102161	+	195	protein_coding	- && -	-
Solyc02g079500.3	5228.13	5624.81	5839.39	875.595	1374.75	773.717	5564.11	1008.02	2.46462	4.50984e-21	1.92409e-19	-	2	44595355	44602184	-	2414	protein_coding	- && P15004.1 RecName: Full=Suberization-associated anionic peroxidase 2; AltName: Full=TMP2; Flags: Precursor	-
Solyc07g066385.1	5418.62	6004.67	5585.02	497.24	1130.75	721.05	5669.44	783.014	2.85611	4.69331e-21	1.9987e-19	-	7	67963535	67965380	+	718	protein_coding	- && -	-
Solyc01g009430.3	2145.46	2433.56	3033.25	439.684	231.657	401.222	2537.42	357.521	2.82729	5.299e-21	2.25251e-19	-	1	3546792	3570152	-	1125	protein_coding	- && -	-
Solyc07g009410.3	583.443	688.628	726.769	2371.09	2795.07	2482.98	666.28	2549.71	-1.93591	5.3841e-21	2.28451e-19	-	7	4477639	4481337	+	2212	protein_coding	- && Q9LI89.1 RecName: Full=F-box/kelch-repeat protein At3g27150	B_lectin
Solyc02g065470.1	1055.86	808.478	1364.71	43.4023	118.677	67.0299	1076.35	76.3696	3.81709	5.72283e-21	2.42039e-19	-	2	37188605	37189147	+	543	protein_coding	- && Q41495.1 RecName: Full=STS14 protein; Flags: Precursor	SCP
Solyc03g078490.3	2156.34	2141.04	2060.19	104.732	58.8636	231.732	2119.19	131.776	4.00755	5.72516e-21	2.42039e-19	-	3	52440729	52442885	+	1642	protein_coding	Glycosyltransferase [Source:UniProtKB/TrEMBL;Acc:K4BHS7] && F8WKW1.1 RecName: Full=7-deoxyloganetin glucosyltransferase; AltName: Full=Genipin glucosyltransferase; AltName: Full=UDP-glucose glucosyltransferase 2; Short=GjUGT2; AltName: Full=UDP-glycosyltransferase 85A24	UDPGT
Solyc04g015210.3	1058.03	1174.12	1350.58	19854.7	7084.52	9569.96	1194.24	12169.7	-3.34909	6.18362e-21	2.60946e-19	-	4	5389515	5396797	-	5045	protein_coding	- && Q6L403.1 RecName: Full=Putative late blight resistance protein homolog R1B-17	NB-ARC
Solyc01g108460.2	1741.62	1469.68	1669.55	338.727	406.349	286.313	1626.95	343.796	2.24247	6.79077e-21	2.86049e-19	-	1	95672553	95697258	-	9417	protein_coding	- && P52711.1 RecName: Full=Serine carboxypeptidase II-3; AltName: Full=CP-MII.3; Contains: RecName: Full=Serine carboxypeptidase II-3 chain A; Contains: RecName: Full=Serine carboxypeptidase II-3 chain B; Flags: Precursor	Peptidase_S10
Solyc07g065380.3	2778.97	2802.25	2652.71	777.468	545.913	680.832	2744.64	668.071	2.03852	6.81737e-21	2.8665e-19	-	7	67295863	67304417	-	1806	protein_coding	- && Q94EG9.1 RecName: Full=Zinc transporter 11; AltName: Full=ZRT/IRT-like protein 11; Flags: Precursor	NIF
Solyc05g006010.3	339.616	343.298	374.488	1330.38	1778.25	1550.31	352.467	1552.98	-2.13936	7.26289e-21	3.04832e-19	-	5	714260	748272	-	10505	protein_coding	- && Q9M817.1 RecName: Full=Protein NRT1/ PTR FAMILY 1.2; Short=AtNPF1.2; AltName: Full=Nitrate transporter 1.11	-
Solyc04g081860.3	0	0	0	892.578	843.079	365.792	0	700.483	-11.8421	7.28036e-21	3.05014e-19	-	4	65815101	65818521	-	2095	protein_coding	Peroxidase [Source:UniProtKB/TrEMBL;Acc:K4BVR5] && Q43872.1 RecName: Full=Peroxidase 64; Short=Atperox P64; AltName: Full=ATP17a; AltName: Full=PRXR4; Flags: Precursor	-
Solyc12g017800.2	18.5047	41.6427	15.141	670.849	432.932	456.761	25.0961	520.181	-4.37171	7.38748e-21	3.08946e-19	-	12	7412427	7414521	+	1999	protein_coding	- && Q6L3Z4.2 RecName: Full=Putative late blight resistance protein homolog R1B-12	-
Solyc04g077270.3	4300.71	4071.84	3885.19	530.263	262.038	149.381	4085.91	313.894	3.70219	7.46396e-21	3.11583e-19	-	4	62328800	62332420	-	3196	protein_coding	- && O81832.4 RecName: Full=G-type lectin S-receptor-like serine/threonine-protein kinase At4g27290; Flags: Precursor	Pkinase_Tyr
Solyc02g065000.1	1951.7	1882.05	1980.45	22.6447	16.14	111.078	1938.07	49.9543	5.2784	7.53649e-21	3.14047e-19	-	2	36696651	36697172	+	522	protein_coding	- && Q9ZQE6.1 RecName: Full=Calmodulin-like protein 1	-
Solyc05g050510.3	3.26554	0	0	612.35	414.894	358.131	1.08851	461.792	-8.79067	7.58316e-21	3.15427e-19	-	5	61495893	61497444	-	901	protein_coding	Protein yippee-like [Source:UniProtKB/TrEMBL;Acc:K4C183] && Q9T096.2 RecName: Full=Protein yippee-like At4g27745	-
Solyc01g097550.3	0	0	0	605.745	1075.69	417.501	0	699.644	-11.8404	8.16218e-21	3.38905e-19	-	1	88230137	88233205	+	2675	protein_coding	- && Q9ZVJ6.1 RecName: Full=Annexin D4; AltName: Full=AnnAt4	-
Solyc09g097960.3	9488.57	9134.99	8807.03	1190.73	367.423	956.613	9143.53	838.256	3.44728	8.96507e-21	3.71579e-19	-	9	72416433	72419750	+	1422	protein_coding	- && Q93ZN2.1 RecName: Full=Probable aldo-keto reductase 4	Aldo_ket_red
Solyc04g049080.3	481.123	528.151	561.227	2197.48	3683.72	4410.57	523.5	3430.59	-2.71209	9.7482e-21	4.03319e-19	-	4	39454637	39458446	+	1140	protein_coding	TET6 [Source:Projected from Arabidopsis thaliana (AT3G12090) UniProtKB/TrEMBL;Acc:A0A178VCX6] && Q9C7C1.1 RecName: Full=Tetraspanin-6	Tetraspannin
Solyc11g011370.2	132.799	176.728	119.109	1376.61	861.118	978.637	142.879	1072.12	-2.90744	1.00362e-20	4.14495e-19	-	11	4399549	4420176	-	3991	protein_coding	ARM repeat superfamily protein [Source:Projected from Arabidopsis thaliana (AT5G37630) UniProtKB/TrEMBL;Acc:F4K790] && Q9ZU95.1 RecName: Full=Nudix hydrolase 17, mitochondrial; Short=AtNUDT17; Flags: Precursor	NUDIX
Solyc02g086480.1	434.317	309.781	444.137	8.49176	0	10.5333	396.078	6.34168	5.96543	1.05071e-20	4.33174e-19	-	2	49794915	49795364	+	450	protein_coding	LOB domain-containing protein 25 [Source:Projected from Arabidopsis thaliana (AT3G27650) UniProtKB/Swiss-Prot;Acc:Q8L8Q3] && Q9FML4.1 RecName: Full=Protein LATERAL ORGAN BOUNDARIES; AltName: Full=ASYMMETRIC LEAVES 2-like protein 4; Short=AS2-like protein 4	-
Solyc11g072570.2	14.1507	38.5957	29.2726	1199.23	693.072	380.155	27.3397	757.484	-4.7892	1.09808e-20	4.51905e-19	-	11	56032296	56040828	-	4397	protein_coding	- && Q9M1E2.1 RecName: Full=Protein NRT1/ PTR FAMILY 2.7; Short=AtNPF2.7; AltName: Full=Nitrate excretion transporter 1	-
Solyc11g072930.2	22.8588	27.4232	2.0188	1131.29	1969.08	498.894	17.4336	1199.76	-6.10703	1.17026e-20	4.80757e-19	-	11	56374498	56381703	+	4819	protein_coding	- && A5PHT0.2 RecName: Full=Uncharacterized protein At1g24485; AltName: Full=Arabidopsis thaliana envelope membrane integrase; Short=Protein ARTEMIS; AltName: Full=Receptor without kinase 1; Flags: Precursor	-
Solyc03g031590.3	0	0	0	500.07	502.24	616.675	0	539.662	-11.4658	1.25387e-20	5.14198e-19	-	3	4098257	4100730	-	1283	protein_coding	- && Q5E930.1 RecName: Full=S-type anion channel SLAH1; AltName: Full=SLAC1-homolog protein 1	C4dic_mal_tran
Solyc06g071920.3	13116.6	12445.1	11868.5	1988.96	2868.18	3332.34	12476.7	2729.83	2.19237	1.30587e-20	5.3458e-19	-	6	44449318	44453948	-	2098	protein_coding	Glyceraldehyde-3-phosphate dehydrogenase [Source:UniProtKB/TrEMBL;Acc:K4C8R4] && P26520.1 RecName: Full=Glyceraldehyde-3-phosphate dehydrogenase, cytosolic	-
Solyc01g097470.3	674.878	678.471	701.534	98.127	52.2177	47.8785	684.961	66.0744	3.3735	1.38697e-20	5.66782e-19	-	1	88191183	88192998	-	1054	protein_coding	- && -	-
Solyc06g067910.3	60.9567	25.3919	52.4889	689.72	2965.97	933.631	46.2792	1529.77	-5.04784	1.41946e-20	5.79042e-19	-	6	42206293	42209704	-	1386	protein_coding	- && -	-
Solyc01g005230.3	0	0	0	846.345	381.664	650.19	0	626.067	-11.6801	1.42792e-20	5.80654e-19	-	1	181577	182840	+	1026	protein_coding	- && Q9FKR0.1 RecName: Full=Probable S-adenosylmethionine-dependent methyltransferase At5g38780	-
Solyc01g108170.3	35.9209	11.1724	16.1504	407.604	1890.28	697.111	21.0813	998.332	-5.56974	1.42841e-20	5.80654e-19	-	1	95438165	95439252	-	892	protein_coding	- && -	-
Solyc11g066270.2	125.179	108.677	98.9213	4528.94	1411.78	1144.3	110.926	2361.67	-4.41241	1.50628e-20	6.11238e-19	-	11	52295594	52298062	+	1225	protein_coding	Xyloglucan endotransglucosylase/hydrolase protein 31 [Source:Projected from Arabidopsis thaliana (AT3G44990) UniProtKB/Swiss-Prot;Acc:P93046] && P93046.2 RecName: Full=Xyloglucan endotransglucosylase/hydrolase protein 31; Short=At-XTH31; Short=AtXTR8; Short=XTH-31; Flags: Precursor	-
Solyc07g052660.1	0	0	0	669.905	1213.35	350.471	0	744.575	-11.9302	1.55352e-20	6.29312e-19	-	7	61242122	61243043	+	837	protein_coding	- && -	Cu_bind_like
Solyc02g030170.3	9354.68	8640.35	7537.2	28560.6	28102.6	24665.1	8510.74	27109.4	-1.67146	1.5854e-20	6.41107e-19	-	2	25733241	25735670	-	2102	protein_coding	- && P93472.1 RecName: Full=Delta(24)-sterol reductase; AltName: Full=Cell elongation protein diminuto	FAD_binding_4
Solyc03g091000.1	0	0	0	405.717	1496.28	532.409	0	811.467	-12.0543	1.71294e-20	6.9148e-19	-	3	55539395	55539724	+	330	protein_coding	- && P14009.1 RecName: Full=14 kDa proline-rich protein DC2.15; Flags: Precursor	-
Solyc04g078860.3	182.87	167.586	121.128	5812.14	1360.51	2223.48	157.195	3132.04	-4.31674	1.85943e-20	7.48093e-19	-	4	63605948	63613373	+	3599	protein_coding	- && O81078.1 RecName: Full=Glutamate receptor 2.9; AltName: Full=Ligand-gated ion channel 2.9; Flags: Precursor	ANF_receptor
Solyc07g052510.3	6867.43	6662.83	6654.98	54543.5	72122.2	27972.5	6728.41	51546.1	-2.93753	1.85961e-20	7.48093e-19	-	7	61147712	61171722	+	4213	protein_coding	- && O23044.1 RecName: Full=Peroxidase 3; Short=Atperox P3; AltName: Full=ATPRC; AltName: Full=RCI3A; AltName: Full=Rare cold-inducible protein; Flags: Precursor	-
Solyc12g017350.2	0	0	0	1020.9	510.784	426.119	0	652.6	-11.74	1.87136e-20	7.51519e-19	-	12	6592753	6594319	+	1161	protein_coding	- && Q0WU02.1 RecName: Full=Metal tolerance protein 10; Short=AtMTP10	-
Solyc02g080220.3	3383.1	3245.08	3039.31	470.821	503.189	801.486	3222.5	591.832	2.44497	1.88204e-20	7.54502e-19	-	2	45052132	45054042	+	1786	protein_coding	Pectinesterase [Source:UniProtKB/TrEMBL;Acc:K4B9P3] && Q1JPL7.3 RecName: Full=Pectinesterase/pectinesterase inhibitor 18; AltName: Full=AtPMEpcrA; Contains: RecName: Full=Pectinesterase inhibitor 18; AltName: Full=Pectin methylesterase inhibitor 18; Contains: RecName: Full=Bifunctional pectinesterase 18/rRNA N-glycosylase; Short=PE 18; AltName: Full=Pectin methylesterase 18; AltName: Full=Pectin …	-
Solyc10g049970.2	5125.81	4728.99	5226.68	1677.59	1603.56	1382.73	5027.16	1554.63	1.69315	2.05581e-20	8.22748e-19	-	10	47206486	47208385	+	1081	protein_coding	- && Q2N5X0.1 RecName: Full=Kynurenine formamidase; Short=KFA; Short=KFase; AltName: Full=Arylformamidase; AltName: Full=N-formylkynurenine formamidase; Short=FKF	-
Solyc06g066230.3	3606.24	3523.38	3872.06	276.454	81.6495	43.0907	3667.23	133.731	4.77706	2.16934e-20	8.66694e-19	-	6	41652441	41655780	-	2595	protein_coding	- && P93531.1 RecName: Full=Cytochrome P450 71D7 [Solanum chacoense]	p450
Solyc04g010270.1	174.162	92.4265	159.485	1299.24	3444.47	1488.06	142.025	2077.26	-3.87088	2.21739e-20	8.8437e-19	-	4	3590661	3591860	+	1200	protein_coding	Dirigent protein [Source:UniProtKB/TrEMBL;Acc:K4BPI1] && O80630.1 RecName: Full=Dirigent protein 9; Short=AtDIR9; Flags: Precursor	-
Solyc05g051480.2	1116.81	1010.6	782.286	150.021	93.9919	74.6905	969.899	106.234	3.19026	2.25794e-20	8.98999e-19	-	5	62683624	62684516	+	444	protein_coding	- && -	-
Solyc01g008840.3	4572.84	4852.9	5212.55	1569.09	1689.96	1516.79	4879.43	1591.94	1.61594	2.27075e-20	9.02554e-19	-	1	2798562	2819783	+	3177	protein_coding	- && Q2V452.2 RecName: Full=CBL-interacting serine/threonine-protein kinase 3; AltName: Full=SNF1-related kinase 3.17; AltName: Full=SOS2-like protein kinase PKS12	Pkinase
Solyc02g077240.3	8798.45	9094.36	7962.16	1169.98	1966.23	957.57	8618.32	1364.59	2.65892	2.28693e-20	9.07435e-19	-	2	42807941	42811007	+	2165	nontranslating_CDS	- && P51850.1 RecName: Full=Pyruvate decarboxylase 1; Short=PDC [Pisum sativum]	TPP_enzyme_N
Solyc05g007790.3	10.8851	22.3449	20.188	417.983	1327.28	359.089	17.806	701.451	-5.29697	2.41511e-20	9.56663e-19	-	5	2238512	2239329	-	634	protein_coding	CASP-like protein [Source:UniProtKB/TrEMBL;Acc:K4BWV4] && Q5NRN4.1 RecName: Full=Casparian strip membrane protein 2; Short=SdCASP2 [Solanum demissum]	-
Solyc03g097410.1	35.9209	90.3951	87.8179	951.077	2434.3	970.976	71.378	1452.12	-4.34502	2.49854e-20	9.88028e-19	-	3	61172847	61173812	+	966	protein_coding	Inositol-tetrakisphosphate 1-kinase [Source:UniProtKB/TrEMBL;Acc:K4BJF8] && Q7XBW0.1 RecName: Full=Inositol-tetrakisphosphate 1-kinase 5; AltName: Full=Inositol 1,3,4-trisphosphate 5/6-kinase 5; Short=Inositol-triphosphate 5/6-kinase 5; Short=Ins(1,3,4)P(3) 5/6-kinase 5; Short=OsITP5/6K-5; Short=OsITPK5; AltName: Full=OsITL3 >A0JJZ6.1 RecName: Full=Inositol-tetrakisphosphate 1-kinase 5; AltName: …	-
Solyc11g007420.1	169.808	252.903	233.172	2.83059	3.79765	1.91514	218.628	2.84779	6.26181	2.52633e-20	9.97323e-19	-	11	1746244	1746633	-	390	protein_coding	- && D7SFH9.1 RecName: Full=Protein SUPPRESSOR OF NPR1-1 CONSTITUTIVE 4; Includes: RecName: Full=Glycerophosphodiester phosphodiesterase protein kinase domain-containing GDPDL2; AltName: Full=Glycerophosphodiester phosphodiesterase-like 2; Short=ATGDPDL2; Includes: RecName: Full=LEAF RUST 10 DISEASE-RESISTANCE LOCUS RECEPTOR-LIKE PROTEIN KINASE-like 2.6; AltName: Full=Probable receptor-like serin…	-
Solyc09g097760.3	447.379	677.456	406.789	0	0	0	510.541	0	11.5124	2.80665e-20	1.10611e-18	-	9	72285937	72286986	-	933	protein_coding	- && -	-
Solyc02g088345.1	170.897	288.452	273.548	1475.68	1455.45	1354	244.299	1428.38	-2.54688	3.12221e-20	1.22839e-18	-	2	51105607	51108142	-	1517	protein_coding	- && Q9ZQ70.1 RecName: Full=Probable WRKY transcription factor 3; AltName: Full=WRKY DNA-binding protein 3	WRKY
Solyc10g076220.2	1144.03	1658.6	1461.61	12446.1	7510.81	6761.4	1421.41	8906.1	-2.64739	3.44348e-20	1.3525e-18	-	10	59140465	59155742	-	2797	protein_coding	- && A5H452.1 RecName: Full=Peroxidase 70; AltName: Full=Plasma membrane-bound peroxidase 2b; Short=pmPOX2b; Flags: Precursor	-
Solyc09g059460.3	29.3899	38.5957	83.7803	1281.31	1379.5	554.433	50.5886	1071.75	-4.40315	3.69369e-20	1.44833e-18	-	9	54749908	54766329	+	2200	protein_coding	- && Q8LPT3.1 RecName: Full=Membrane protein of ER body-like protein	-
Solyc04g076710.3	27.2128	22.3449	35.329	422.701	314.256	339.937	28.2956	358.965	-3.66465	3.8921e-20	1.52356e-18	-	4	61681548	61696075	-	785	protein_coding	- && -	-
Solyc03g097585.1	0	0	0	354.767	680.729	639.657	0	558.384	-11.515	4.00443e-20	1.56489e-18	-	3	61358847	61388027	-	2682	protein_coding	- && B8BKP4.1 RecName: Full=Bidirectional sugar transporter SWEET14; Short=OsSWEET14	-
Solyc00g170200.1	0	0	0	800.112	520.278	383.028	0	567.806	-11.5392	4.09973e-20	1.59944e-18	-	SL3.00SC0001588	137	520	+	384	protein_coding	- && -	-
Solyc01g094910.3	84.904	93.4422	44.4137	3451.43	1121.26	922.14	74.2533	1831.61	-4.62497	4.16884e-20	1.62368e-18	-	1	86189850	86193132	-	2394	protein_coding	- && P92949.2 RecName: Full=Ferric reduction oxidase 2; Short=AtFRO2; AltName: Full=Ferric-chelate reductase 2; AltName: Full=Protein FERRIC CHELATE REDUCTASE DEFECTIVE 1	FAD_binding_8
Solyc09g010400.3	1284.45	1047.16	986.185	4490.25	6706.66	4580.06	1105.93	5258.99	-2.24965	4.3383e-20	1.68686e-18	-	9	3777986	3778764	+	558	protein_coding	Histone H2A [Source:UniProtKB/TrEMBL;Acc:K4CR67] && Q2HU65.1 RecName: Full=Probable histone H2A.2	Histone
Solyc02g067580.3	8502.38	8414.87	9520.67	355.71	1192.46	900.116	8812.64	816.096	3.43279	4.47225e-20	1.73604e-18	-	2	38306368	38308626	+	739	protein_coding	- && -	-
Solyc03g079880.3	2183.56	2261.91	2391.27	7652.96	13194	12462.8	2278.91	11103.2	-2.28455	4.55253e-20	1.76426e-18	-	3	53115021	53115694	+	576	protein_coding	- && -	-
Solyc08g068160.2	13.0622	13.2038	19.1786	338.727	571.547	234.605	15.1482	381.626	-4.65328	4.76645e-20	1.84408e-18	-	8	57325569	57329680	-	2289	protein_coding	Flavin-containing monooxygenase [Source:UniProtKB/TrEMBL;Acc:K4CM40] && Q8VZ59.1 RecName: Full=Indole-3-pyruvate monooxygenase YUCCA6; AltName: Full=Flavin-containing monooxygenase YUCCA6; AltName: Full=Protein HYPERTALL1	FMO-like
Solyc02g083280.3	171.985	102.583	130.213	1150.16	785.165	1297.51	134.927	1077.61	-2.99847	5.24596e-20	2.02623e-18	-	2	47283089	47285753	+	938	protein_coding	- && Q38853.1 RecName: Full=Rhodanese-like domain-containing protein 15, chloroplastic; AltName: Full=Protein DARK INDUCIBLE 1; AltName: Full=Senescence-associated protein 1; Short=AtSEN1; AltName: Full=Sulfurtransferase 15; Short=AtStr15; Flags: Precursor	Rhodanese
Solyc09g008590.3	0	0	0	455.724	1316.84	394.519	0	722.36	-11.8865	5.3535e-20	2.06434e-18	-	9	2056560	2057571	-	503	protein_coding	- && Q03211.1 RecName: Full=Pistil-specific extensin-like protein; Short=PELP; Flags: Precursor	-
Solyc02g082670.3	2677.74	2879.44	2720.34	881.256	731.048	681.79	2759.17	764.698	1.85125	5.51728e-20	2.12397e-18	-	2	46870653	46873288	-	979	protein_coding	WOX13 [Source:Projected from Arabidopsis thaliana (AT4G35550) UniProtKB/TrEMBL;Acc:A0A178UZQ1] && Q5QMM3.1 RecName: Full=WUSCHEL-related homeobox 8; AltName: Full=OsWOX8; AltName: Full=Protein WOX13	Homeobox
Solyc10g008000.1	1063.48	1031.93	1099.24	31.1364	41.7742	112.036	1064.88	61.6488	4.11096	5.64942e-20	2.17125e-18	-	10	2159741	2160277	+	537	protein_coding	LSH10 [Source:Projected from Arabidopsis thaliana (AT2G42610) UniProtKB/TrEMBL;Acc:A0A178VLX9] && Q9S7R3.1 RecName: Full=Protein LIGHT-DEPENDENT SHORT HYPOCOTYLS 10; AltName: Full=Protein ORGAN BOUNDARY 10	-
Solyc10g007290.3	444.113	386.972	613.716	6834.92	6242.39	2471.49	481.601	5182.93	-3.42779	5.92348e-20	2.27282e-18	-	10	1675685	1684543	-	4077	protein_coding	- && P27154.1 RecName: Full=Phosphoenolpyruvate carboxylase; Short=PEPC; Short=PEPCase	-
Solyc08g074480.1	2627.67	2967.8	2960.57	189.649	453.82	171.405	2852.02	271.625	3.39228	6.56522e-20	2.5149e-18	-	8	58702881	58703276	+	396	protein_coding	- && P14009.1 RecName: Full=14 kDa proline-rich protein DC2.15; Flags: Precursor	-
Solyc11g067330.1	0	0	0	737.839	1113.66	271.95	0	707.817	-11.8572	6.64213e-20	2.54018e-18	-	11	53360820	53362121	+	1302	protein_coding	- && K4D9Y4.1 RecName: Full=Acylsugar acyltransferase 3; Short=Sl-ASAT3	-
Solyc09g082980.3	520.309	588.076	468.362	3326.88	2003.26	3138.91	525.583	2823.02	-2.42525	6.81754e-20	2.60298e-18	-	9	69098887	69101164	+	2088	protein_coding	- && -	-
Solyc05g013880.1	338.528	275.248	304.839	1404.91	1237.09	1213.24	306.205	1285.08	-2.06961	6.87751e-20	2.62157e-18	-	5	7319712	7320989	-	1278	protein_coding	- && -	-
Solyc01g099840.3	4011.17	3900.19	4103.22	13133.9	14727.3	20182.7	4004.86	16014.6	-1.99956	6.9256e-20	2.63558e-18	-	1	89862094	89864203	+	907	protein_coding	- && Q8LD26.1 RecName: Full=Dormancy-associated protein homolog 3; AltName: Full=DRM1 homolog 3	-
Solyc03g119310.3	715.153	569.794	634.913	106.619	95.8907	70.8602	639.954	91.1232	2.81177	6.98976e-20	2.65565e-18	-	3	69443092	69444865	-	980	protein_coding	- && -	-
Solyc10g047170.2	0	0	0	4864.83	1019.67	2428.4	0	2770.97	-13.8261	7.59901e-20	2.88242e-18	-	10	39890485	39894553	-	2657	protein_coding	- && Q9FEP7.1 RecName: Full=Sulfate transporter 1.3	Sulfate_transp
Solyc08g068070.3	3616.04	3454.31	3556.12	408.548	638.006	803.401	3542.16	616.652	2.52216	7.89027e-20	2.98802e-18	-	8	57224659	57229954	+	615	protein_coding	- && Q67XG0.1 RecName: Full=Two-on-two hemoglobin-3; Short=AtGLB3; AltName: Full=2-on-2 hemoglobin-3	-
Solyc01g067300.3	3081.58	3581.27	3322.95	710.477	453.82	781.377	3328.6	648.558	2.35964	8.40522e-20	3.17786e-18	-	1	75531346	75539137	-	4279	protein_coding	CASP-like protein [Source:UniProtKB/TrEMBL;Acc:K4AWX9] && J9RYI6.1 RecName: Full=Divinyl chlorophyllide a 8-vinyl-reductase, chloroplastic; Flags: Precursor	-
Solyc10g008900.3	0	0	0	381.186	1134.55	441.44	0	652.391	-11.7395	8.63683e-20	3.26012e-18	-	10	2922004	2923651	+	948	protein_coding	Dirigent protein [Source:UniProtKB/TrEMBL;Acc:K4CY66] && Q9C523.1 RecName: Full=Dirigent protein 19; Short=AtDIR19; Flags: Precursor	-
Solyc07g006750.3	197.021	218.37	208.946	852.006	1113.66	1002.58	208.112	989.415	-2.24901	1.00901e-19	3.80252e-18	-	7	1586004	1591554	-	4475	protein_coding	- && Q9FKL2.1 RecName: Full=Transcription factor MYB36; AltName: Full=Myb-related protein 36; Short=AtMYB36	Myb_DNA-binding
Solyc06g074710.1	0	0	0	991.649	769.974	257.586	0	673.07	-11.7845	1.01856e-19	3.83228e-18	-	6	46380247	46381581	-	1335	protein_coding	- && A9ZPJ7.1 RecName: Full=Agmatine coumaroyltransferase-2	-
Solyc10g080510.1	0	0	0	1364.34	301.913	538.154	0	734.803	-11.9111	1.12219e-19	4.21537e-18	-	10	61887834	61889846	-	2013	protein_coding	Clade XII lectin receptor kinase [Source:UniProtKB/TrEMBL;Acc:K4D2U1] && Q9FG33.1 RecName: Full=Probable L-type lectin-domain containing receptor kinase S.5; Short=LecRK-S.5; Flags: Precursor	Pkinase
Solyc05g054780.2	399.484	538.308	332.093	2075.76	3903.99	2867.92	423.295	2949.22	-2.80055	1.124e-19	4.21537e-18	-	5	65467785	65469017	-	891	protein_coding	- && O80630.1 RecName: Full=Dirigent protein 9; Short=AtDIR9; Flags: Precursor	-
Solyc06g069420.3	52.2486	96.4892	78.7333	1044.49	620.916	664.554	75.8237	776.652	-3.35519	1.16433e-19	4.35959e-18	-	6	43287141	43288920	-	1363	protein_coding	- && -	Usp
Solyc12g088970.1	0	0	0	1636.08	473.757	323.659	0	811.165	-12.0538	1.19693e-19	4.47443e-18	-	12	65126268	65128507	+	1584	protein_coding	- && Q9SZ46.1 RecName: Full=Cytochrome P450 82C4	p450
Solyc06g005150.3	14798.3	14067.1	14509.1	3854.31	5081.26	3797.72	14458.2	4244.43	1.76824	1.20999e-19	4.51599e-18	-	6	170183	173377	-	1187	protein_coding	Ascorbate peroxidase [Source:UniProtKB/TrEMBL;Acc:Q52QQ4] && Q05431.2 RecName: Full=L-ascorbate peroxidase 1, cytosolic; Short=AP; Short=AtAPx01	-
Solyc12g098840.2	0	0	0	694.437	474.707	357.174	0	508.772	-11.3808	1.2251e-19	4.56507e-18	-	12	67206768	67212249	+	3858	protein_coding	- && Q9FWX7.1 RecName: Full=ABC transporter B family member 11; Short=ABC transporter ABCB.11; Short=AtABCB11; AltName: Full=Multidrug resistance protein 8; AltName: Full=P-glycoprotein 11	ABC_membrane
novel.812	1454.25	1388.43	1385.91	89.6352	99.6884	222.156	1409.53	137.16	3.36152	1.24996e-19	4.65024e-18	-	7	27025066	27029616	-	1861	-	- && - && -	-
novel.103	0	0	0	846.345	957.958	241.308	0	681.87	-11.8033	1.25965e-19	4.6788e-18	-	1	88310725	88314931	-	1371	-	- && - && -	-
Solyc07g043460.3	39.1865	55.8622	34.3196	401.943	1838.06	980.552	43.1228	1073.52	-4.63745	1.29166e-19	4.79007e-18	-	7	57374067	57376529	+	2155	protein_coding	- && Q05047.1 RecName: Full=Secologanin synthase; Short=SLS; AltName: Full=CYPLXXII; AltName: Full=Cytochrome P450 72A1	p450
Solyc03g118640.3	1936.46	1764.23	1862.35	6663.2	5486.66	5516.56	1854.35	5888.81	-1.6671	1.31975e-19	4.88645e-18	-	3	68986113	69005740	+	4305	protein_coding	- && Q46888.1 RecName: Full=Uncharacterized oxidoreductase YgbJ	F_bP_aldolase
Solyc06g074540.3	20.6817	14.2195	29.2726	263.245	1101.32	654.978	21.3913	673.181	-4.97544	1.40254e-19	5.17991e-18	-	6	46263736	46265513	+	1240	protein_coding	- && Q8LA14.2 RecName: Full=Putative phytosulfokines 6; Short=AtPSK3_2; Short=AtPSK6; Contains: RecName: Full=Phytosulfokine-alpha-like; Short=PSK-alpha-like; Short=Phytosulfokine-a-like; Contains: RecName: Full=Phytosulfokine-beta; Short=PSK-beta; Short=Phytosulfokine-b; Flags: Precursor	-
Solyc02g082090.3	0	0	0	453.837	790.861	356.216	0	533.638	-11.4496	1.40348e-19	5.17991e-18	-	2	46368361	46370634	-	1266	protein_coding	Peroxidase [Source:UniProtKB/TrEMBL;Acc:K4BA79] && Q9SY33.1 RecName: Full=Peroxidase 7; Short=Atperox P7; AltName: Full=ATP30; Flags: Precursor	-
Solyc08g080750.3	217.703	169.618	271.529	1982.35	1104.17	1998.45	219.616	1694.99	-2.94816	1.4057e-19	5.17991e-18	-	8	64078738	64080045	+	993	protein_coding	- && Q9SH27.1 RecName: Full=Protein LURP-one-related 4	-
Solyc07g055490.3	785.906	1009.58	884.236	37.7411	11.393	66.0723	893.241	38.4021	4.5402	1.47522e-19	5.4275e-18	-	7	63634869	63637302	-	1693	protein_coding	- && H2DH21.1 RecName: Full=Cytochrome P450 CYP72A219; AltName: Full=Cytochrome P450 CYP72A129 [Panax ginseng]	p450
Solyc07g006160.3	525.752	524.089	569.302	2122	1743.12	1921.84	539.714	1928.99	-1.83752	1.73572e-19	6.37584e-18	-	7	996235	1003206	+	2845	protein_coding	- && Q3V384.1 RecName: Full=Lactation elevated protein 1	AFG1_ATPase
Solyc04g049920.3	0	0	0	331.179	1611.15	427.076	0	789.803	-12.0153	1.85474e-19	6.79323e-18	-	4	44734033	44737773	+	1206	protein_coding	- && Q9M1S3.1 RecName: Full=Probable RNA-binding protein ARP1; AltName: Full=ABA-regulated RNA-binding protein 1	RRM_1
Solyc03g026120.3	0	12.1881	11.1034	424.588	694.971	327.489	7.76384	482.349	-5.94506	1.8552e-19	6.79323e-18	-	3	3555861	3558951	-	2270	protein_coding	- && O80844.1 RecName: Full=Probable methyltransferase PMT16	-
Solyc08g079080.3	0	0	0	367.033	1023.47	405.052	0	598.517	-11.6152	1.91188e-19	6.98979e-18	-	8	62843244	62847281	+	1985	protein_coding	- && P29001.1 RecName: Full=Acid beta-fructofuranosidase; AltName: Full=Acid invertase; Short=AI; AltName: Full=Acid sucrose hydrolase; AltName: Full=Vacuolar invertase; Contains: RecName: Full=Acid beta-fructofuranosidase 30 kDa subunit; Contains: RecName: Full=Acid beta-fructofuranosidase 38 kDa subunit; Flags: Precursor	-
Solyc01g108350.3	6768.37	6805.03	6554.04	0.943529	0	9.5757	6709.15	3.50641	10.904	1.98302e-19	7.2385e-18	-	1	95587060	95588847	+	1690	protein_coding	- && -	-
Solyc09g083400.3	396.219	309.781	294.745	3176.86	4631.24	1678.62	333.582	3162.24	-3.24506	2.1911e-19	7.9855e-18	-	9	69478076	69483331	-	2456	protein_coding	- && Q84WL6.1 RecName: Full=Protein WVD2-like 3; AltName: Full=Protein WAVE-DAMPENED 2-LIKE3	-
Solyc04g050620.3	163.277	117.818	193.805	2155.02	962.705	1394.22	158.3	1503.98	-3.24809	2.29801e-19	8.36202e-18	-	4	47627779	47629754	-	1881	protein_coding	- && H2DH18.1 RecName: Full=Cytochrome P450 CYP736A12 [Panax ginseng]	p450
Solyc07g062490.1	1462.96	1434.13	1676.62	222.673	355.081	216.411	1524.57	264.721	2.52586	2.40135e-19	8.72441e-18	-	7	65339014	65339907	+	894	protein_coding	- && Q39688.1 RecName: Full=Epidermis-specific secreted glycoprotein EP1; AltName: Full=52/54 kDa medium protein; Flags: Precursor	B_lectin
Solyc02g093830.3	14513.1	13435.4	13667.3	4945.03	4008.42	4845.3	13871.9	4599.59	1.59259	2.52125e-19	9.14574e-18	-	2	55173064	55179178	+	2055	protein_coding	- && P37830.1 RecName: Full=Glucose-6-phosphate 1-dehydrogenase, cytoplasmic isoform; Short=G6PD	G6PD_C
Solyc01g087060.3	0	2.03135	11.1034	330.235	393.057	344.725	4.37826	356.006	-6.32682	2.83498e-19	1.02677e-17	-	1	81869621	81874752	-	1296	protein_coding	- && Q8L649.1 RecName: Full=E3 ubiquitin ligase BIG BROTHER; AltName: Full=Protein ENHANCER OF DA1-1; AltName: Full=RING-type E3 ubiquitin transferase BIG BROTHER	-
Solyc01g079550.2	181.782	169.618	148.382	881.256	1343.42	877.134	166.594	1033.94	-2.63407	2.8666e-19	1.03661e-17	-	1	78478110	78478932	+	823	protein_coding	- && -	-
Solyc06g034370.1	1052.59	1015.68	913.508	7.54823	61.7119	36.3877	993.925	35.2159	4.81913	3.23143e-19	1.16673e-17	-	6	24270678	24271256	-	579	protein_coding	- && P17407.1 RecName: Full=21 kDa protein; AltName: Full=1.2 protein; Flags: Precursor	-
Solyc09g083200.3	514.867	412.364	566.274	2148.41	1979.53	2762.59	497.835	2296.84	-2.20594	3.44548e-19	1.24208e-17	-	9	69300110	69302394	+	2092	protein_coding	- && Q0GXS4.1 RecName: Full=Serine/threonine receptor-like kinase NFP; Short=RLK NFP; AltName: Full=Nod factor perception protein; AltName: Full=Nod-factor receptor 5; Flags: Precursor	Pkinase
Solyc02g083310.3	830.535	666.283	820.643	2545.64	2796.02	2678.32	772.487	2673.33	-1.79116	3.50631e-19	1.26205e-17	-	2	47318548	47323145	-	1909	protein_coding	- && Q6YZM6.1 RecName: Full=Bifunctional nuclease 2; Short=OsBBD2	-
Solyc02g078570.3	69.6648	61.9562	95.8931	1410.58	1187.72	505.597	75.8381	1034.63	-3.76971	3.55349e-19	1.27706e-17	-	2	43802251	43804631	-	1551	protein_coding	- && P34913.2 RecName: Full=Bifunctional epoxide hydrolase 2; Includes: RecName: Full=Cytosolic epoxide hydrolase 2; Short=CEH; AltName: Full=Epoxide hydratase; AltName: Full=Soluble epoxide hydrolase; Short=SEH; Includes: RecName: Full=Lipid-phosphate phosphatase	Abhydrolase_1
Solyc11g069540.2	59.8682	65.0032	89.8367	1446.43	886.752	526.664	71.5694	953.282	-3.73483	3.56671e-19	1.27983e-17	-	11	54453483	54457620	-	1165	protein_coding	- && Q8RXL8.1 RecName: Full=Uncharacterized membrane protein At1g06890	-
Solyc09g007790.1	3124.03	3237.97	3816.55	894.465	543.064	719.135	3392.85	718.888	2.23866	3.70668e-19	1.32801e-17	-	9	1315466	1315942	+	477	protein_coding	- && -	-
Solyc08g068680.3	3294.93	2759.59	3415.81	685.002	392.108	330.362	3156.78	469.157	2.75023	3.87496e-19	1.38616e-17	-	8	57876464	57878575	-	1633	protein_coding	Aromatic amino acid decarboxylase 1A [Source:UniProtKB/TrEMBL;Acc:Q1KSC6] && P54772.1 RecName: Full=Histidine decarboxylase; Short=HDC; AltName: Full=TOM92	-
Solyc03g005450.3	820.739	565.731	746.957	5328.11	3900.19	10454.8	711.142	6561.02	-3.20578	3.88986e-19	1.38936e-17	-	3	338540	346806	+	2640	protein_coding	- && Q8VYR4.1 RecName: Full=Cellulose synthase-like protein G2; Short=AtCslG2	-
Solyc10g081560.2	236.207	227.511	292.726	5.66117	0	5.74542	252.148	3.8022	6.0517	4.03817e-19	1.44012e-17	-	10	62728093	62730961	-	934	protein_coding	- && P50162.1 RecName: Full=Tropinone reductase 1; AltName: Full=Tropine dehydrogenase; AltName: Full=Tropinone reductase I; Short=TR-I	adh_short
Solyc02g078860.3	4212.55	3793.55	4369.7	347.219	481.353	837.874	4125.26	555.482	2.89274	4.10557e-19	1.46191e-17	-	2	44066609	44069986	-	1805	protein_coding	- && Q38945.1 RecName: Full=PAP-specific phosphatase HAL2-like; AltName: Full=3'(2'),5'-bisphosphate nucleotidase; AltName: Full=3'(2'),5-bisphosphonucleoside 3'(2')-phosphohydrolase; AltName: Full=DPNPase; AltName: Full=Halotolerance protein	-
Solyc08g067340.3	100.143	77.1913	145.354	1879.51	718.706	1412.42	107.563	1336.88	-3.63536	4.31048e-19	1.53253e-17	-	8	56457272	56459264	+	890	protein_coding	- && Q9SAH7.1 RecName: Full=Probable WRKY transcription factor 40; AltName: Full=WRKY DNA-binding protein 40	WRKY
Solyc11g045520.2	0	0	0	7219.88	1462.1	2267.53	0	3649.83	-14.2235	4.33622e-19	1.53933e-17	-	11	30596687	30599475	+	1788	protein_coding	- && Q9C899.1 RecName: Full=Feruloyl CoA ortho-hydroxylase 2	2OG-FeII_Oxy
Solyc10g079770.2	546.434	664.252	640.97	4611.02	2359.29	4002.64	617.218	3657.65	-2.56696	4.51766e-19	1.60129e-17	-	10	61400057	61403684	-	2586	protein_coding	- && Q9LZA6.1 RecName: Full=Triacylglycerol lipase SDP1; AltName: Full=Protein SUGAR-DEPENDENT 1	-
Solyc05g055970.3	0	0	0	623.672	507.936	291.101	0	474.237	-11.2794	4.63195e-19	1.6393e-17	-	5	66229949	66232088	-	1238	protein_coding	- && -	-
Solyc06g074230.3	45.7175	43.6741	97.9119	682.171	1624.45	812.977	62.4345	1039.86	-4.05678	4.64353e-19	1.6409e-17	-	6	46037811	46038766	-	797	protein_coding	CASP-like protein [Source:UniProtKB/TrEMBL;Acc:K4C9E1] && P0DI53.1 RecName: Full=Casparian strip membrane protein 3; Short=MgCASP3	-
Solyc07g009230.3	5917.16	5572	6530.83	121096	27276.6	117166	6006.66	88513.1	-3.88126	5.03806e-19	1.77762e-17	-	7	4263182	4264706	+	772	protein_coding	- && -	-
Solyc01g011430.3	0	0	0	464.216	526.924	310.253	0	433.798	-11.1508	5.79945e-19	2.04316e-17	-	1	9166319	9168578	-	1575	protein_coding	- && Q93ZR6.1 RecName: Full=O-acyltransferase WSD1; AltName: Full=Diacylglycerol O-acyltransferase; Short=DGAT; AltName: Full=Long-chain-alcohol O-fatty-acyltransferase; AltName: Full=Wax synthase; Short=WS	-
Solyc06g061170.3	4277.86	4068.8	3868.03	906.731	1145.94	687.535	4071.56	913.403	2.15622	5.82397e-19	2.0487e-17	-	6	39291655	39297319	+	2717	protein_coding	- && Q93XM7.1 RecName: Full=Mitochondrial carnitine/acylcarnitine carrier-like protein; AltName: Full=Carnitine/acylcarnitine translocase-like protein; Short=CAC-like protein; AltName: Full=Protein A BOUT DE SOUFFLE	Mito_carr
Solyc06g065970.1	0	0	0	350.049	975.047	353.343	0	559.48	-11.5179	5.89495e-19	2.07053e-17	-	6	41470022	41470402	+	381	protein_coding	- && P14009.1 RecName: Full=14 kDa proline-rich protein DC2.15; Flags: Precursor	-
Solyc06g072030.1	657.462	738.396	1067.95	124.546	132.918	113.951	821.268	123.805	2.7299	6.05118e-19	2.1222e-17	-	6	44535729	44535908	+	180	protein_coding	- && -	-
Solyc01g094690.3	102.32	172.665	252.35	1444.54	4235.33	2143.04	175.778	2607.64	-3.89027	6.10328e-19	2.13725e-17	-	1	86011826	86014616	+	1296	protein_coding	Plasmamembrane intrinsic protein 12 [Source:UniProtKB/TrEMBL;Acc:K4AZL0] && Q8LAA6.2 RecName: Full=Probable aquaporin PIP1-5; Short=AtPIP1;5; AltName: Full=Plasma membrane intrinsic protein 1d; Short=PIP1d	-
Solyc06g069900.3	0	0	3.0282	398.169	335.143	295.889	1.0094	343.067	-8.37493	6.34225e-19	2.21759e-17	-	6	43635622	43637820	+	1588	protein_coding	- && O04395.1 RecName: Full=Flavonol synthase/flavanone 3-hydroxylase; Short=FLS, partial [Matthiola incana]	2OG-FeII_Oxy
Solyc11g007220.2	0	0	0	682.171	910.487	211.623	0	601.427	-11.6222	7.12161e-19	2.48636e-17	-	11	1628519	1634611	-	2334	protein_coding	- && A7QEU4.2 RecName: Full=Peroxidase 5; Flags: Precursor	-
Solyc04g077780.3	806.588	861.293	575.359	4804.45	3561.25	7793.66	747.747	5386.45	-2.84877	7.41266e-19	2.5841e-17	-	4	62766156	62768254	-	975	protein_coding	- && Q94JX5.1 RecName: Full=LIM domain-containing protein WLIM1; AltName: Full=Widely-expressed LIM protein 1; Short=AtWLIM1	LIM
Solyc03g005530.1	0	0	0	656.696	207.922	1014.07	0	626.228	-11.6804	7.43773e-19	2.58896e-17	-	3	399304	400890	-	1587	protein_coding	Inorganic phosphate transporter [Source:UniProtKB/TrEMBL;Acc:O22549] && O48639.1 RecName: Full=Probable inorganic phosphate transporter 1-3; Short=AtPht1;3; AltName: Full=H(+)/Pi cotransporter	Sugar_tr
Solyc08g008150.1	334.173	330.095	317.961	6.6047	16.14	1.91514	327.41	8.21996	5.31487	7.6897e-19	2.67266e-17	-	8	2619622	2619894	+	273	protein_coding	- && -	-
Solyc02g066960.3	0	0	0	1158.65	491.796	245.138	0	631.862	-11.6934	7.70546e-19	2.67414e-17	-	2	37780693	37783405	+	2317	protein_coding	Glycosyltransferase [Source:UniProtKB/TrEMBL;Acc:K4B728] && Q9SGA8.1 RecName: Full=UDP-glycosyltransferase 83A1	UDPGT
Solyc05g005170.3	1894.01	1320.38	1764.43	80.1999	167.097	35.4301	1659.61	94.2423	4.13817	7.867e-19	2.7241e-17	-	5	159158	162275	+	1596	protein_coding	- && Q949Z1.1 RecName: Full=Polygalacturonase At1g48100; Short=PG; AltName: Full=Pectinase At1g48100; Flags: Precursor	-
Solyc09g082530.2	599.771	480.415	478.456	6376.37	3099.83	2829.62	519.547	4101.94	-2.98112	7.87286e-19	2.7241e-17	-	9	68673195	68675442	-	1143	protein_coding	- && Q9LUI1.1 RecName: Full=Leucine-rich repeat extensin-like protein 6; Short=AtLRX6; Short=LRR/EXTENSIN6; AltName: Full=Cell wall hydroxyproline-rich glycoprotein; Flags: Precursor	-
Solyc04g081560.3	137.153	99.5362	53.4983	862.385	1336.77	928.843	96.729	1042.67	-3.43165	7.97652e-19	2.75587e-17	-	4	65597160	65601371	+	2712	nontranslating_CDS	- && P28493.1 RecName: Full=Pathogenesis-related protein 5; Short=PR-5; Flags: Precursor	Thaumatin
Solyc05g012580.1	2212.95	2772.79	2265.1	9586.25	8177.3	12694.5	2416.95	10152.7	-2.07057	8.46867e-19	2.92157e-17	-	5	5800175	5800387	+	213	protein_coding	- && Q9ZQ80.1 RecName: Full=Nodulin-related protein 1; Short=AtNRP1; AltName: Full=RPS2-interacting protein 11	-
Solyc05g012730.1	0	0	0	1094.49	382.614	298.762	0	591.956	-11.5993	8.92112e-19	3.0731e-17	-	5	5907115	5908362	+	1248	protein_coding	- && Q940Q8.1 RecName: Full=Probable beta-1,4-xylosyltransferase IRX10L; AltName: Full=Glucuronoxylan glucuronosyltransferase 1; Short=AtGUT1; AltName: Full=Glucuronoxylan glucuronosyltransferase 2; Short=AtGUT2; AltName: Full=Protein IRREGULAR XYLEM 10-like; AltName: Full=Xylan xylosyltransferase IRX10L	-
Solyc01g105070.3	48413.8	49032.8	49296.1	6128.22	12157.2	6056.63	48914.2	8114.03	2.59176	9.30736e-19	3.2014e-17	-	1	93248597	93250230	+	1233	protein_coding	Peroxidase [Source:UniProtKB/TrEMBL;Acc:K4B277] && Q9XIV8.1 RecName: Full=Peroxidase N1; AltName: Full=Peroxidase B2; AltName: Full=Peroxidase B3; Flags: Precursor	-
Solyc01g100690.3	131.71	81.2541	122.138	1434.16	657.943	1601.06	111.701	1231.05	-3.46265	9.33172e-19	3.20504e-17	-	1	90538325	90550138	+	2902	protein_coding	- && -	-
Solyc02g014300.2	0	0	0	437.797	551.609	294.932	0	428.113	-11.1318	9.53458e-19	3.26988e-17	-	2	16203282	16205793	+	2424	protein_coding	Pectinesterase [Source:UniProtKB/TrEMBL;Acc:K4B4M9] && Q9FF78.1 RecName: Full=Probable pectinesterase/pectinesterase inhibitor 46; Includes: RecName: Full=Pectinesterase inhibitor 46; AltName: Full=Pectin methylesterase inhibitor 46; Includes: RecName: Full=Pectinesterase 46; Short=PE 46; AltName: Full=Pectin methylesterase 46; Short=AtPME46	-
Solyc11g070130.2	10704.4	9996.28	10363.5	2322.97	2212.13	3358.2	10354.7	2631.1	1.97657	1.05799e-18	3.62302e-17	-	11	54949360	54952820	+	1070	protein_coding	Profilin [Source:UniProtKB/TrEMBL;Acc:Q8VWR0] && Q93YI9.1 RecName: Full=Profilin; AltName: Full=Minor food allergen Cap a 2; AltName: Allergen=Cap a 2	-
Solyc04g071140.3	448.467	313.844	329.065	4598.76	1801.99	2976.13	363.792	3125.62	-3.10322	1.12975e-18	3.86309e-17	-	4	58155586	58163569	+	4144	protein_coding	SDC1 [Source:Projected from Arabidopsis thaliana (AT1G43710) UniProtKB/TrEMBL;Acc:A0A178WA97] && Q9MA74.1 RecName: Full=Serine decarboxylase; Short=AtSDC; AltName: Full=Protein EMBRYO DEFECTIVE 1075; AltName: Full=Serine decarboxylase 1; Short=AtSDC1	-
Solyc04g080760.3	175.251	324.001	208.946	1502.1	2679.24	1595.31	236.066	1925.55	-3.02759	1.13177e-18	3.8643e-17	-	4	64943256	64945269	-	1038	protein_coding	Peroxidase [Source:UniProtKB/TrEMBL;Acc:K4BVF5] && Q96512.1 RecName: Full=Peroxidase 9; Short=Atperox P9; AltName: Full=ATP18a; Flags: Precursor	-
Solyc10g086520.2	0	0	0	302.873	785.165	374.41	0	487.482	-11.3191	1.18634e-18	4.04469e-17	-	10	65433198	65435216	-	1274	protein_coding	- && O80932.1 RecName: Full=Expansin-A3; Short=AtEXPA3; AltName: Full=Alpha-expansin-3; Short=At-EXP3; Short=AtEx3; AltName: Full=Ath-ExpAlpha-1.9; Flags: Precursor	-
Solyc09g075020.3	10924.3	10812.9	11033.8	2191.82	823.141	1071.52	10923.7	1362.16	3.00346	1.2729e-18	4.33346e-17	-	9	67245691	67255125	+	5112	protein_coding	- && Q7DM58.2 RecName: Full=ABC transporter C family member 4; Short=ABC transporter ABCC.4; Short=AtABCC4; AltName: Full=ATP-energized glutathione S-conjugate pump 4; AltName: Full=Glutathione S-conjugate-transporting ATPase 4; AltName: Full=Multidrug resistance-associated protein 4	ABC_membrane
Solyc01g096435.1	4187.51	4442.57	4299.04	1307.73	969.351	1336.77	4309.71	1204.62	1.83903	1.28826e-18	4.37932e-17	-	1	87400601	87402454	-	600	protein_coding	- && Q8H9D2.1 RecName: Full=NAD(P)H:quinone oxidoreductase; Short=NAD(P)H:QR	FMN_red
Solyc08g083040.3	7386.65	6895.42	6804.37	2084.25	1247.53	1655.64	7028.82	1662.47	2.07993	1.4488e-18	4.91788e-17	-	8	65746011	65757714	-	4198	protein_coding	- && Q551H4.1 RecName: Full=Serine/threonine-protein kinase fray2; AltName: Full=STE20-like kinase fray2	-
Solyc03g034370.1	2085.59	2215.19	2232.8	270.793	495.594	445.27	2177.86	403.886	2.43096	1.50902e-18	5.11484e-17	-	3	6228723	6228914	+	192	protein_coding	- && P82353.1 RecName: Full=Non-specific lipid-transfer protein 2; Short=LTP 2	-
Solyc04g076950.3	855.571	528.151	575.359	0.943529	3.79765	22.9817	653.027	9.24095	6.14515	1.56077e-18	5.28252e-17	-	4	61977831	61980247	-	1976	protein_coding	Protein DETOXIFICATION [Source:UniProtKB/TrEMBL;Acc:K4BUD2] && Q9SLV0.1 RecName: Full=Protein DETOXIFICATION 48; Short=AtDTX48; AltName: Full=Multidrug and toxic compound extrusion protein 48; Short=MATE protein 48; AltName: Full=Protein ABNORMAL SHOOT 4; AltName: Full=Protein BUSH-AND-CHLOROTIC-DWARF 1; Short=Protein BCD1; AltName: Full=Protein ZRIZI	MatE
Solyc12g037950.2	0	0	0	464.216	1192.46	225.029	0	627.236	-11.6828	1.64813e-18	5.57011e-17	-	12	49162527	49168971	+	1046	protein_coding	- && D9HP23.1 RecName: Full=Cell number regulator 7; AltName: Full=ZmCNR07	-
Solyc11g065000.2	2881.29	2533.1	2884.87	835.966	873.46	939.376	2766.42	882.934	1.64764	1.6924e-18	5.71142e-17	-	11	50617681	50622689	+	2633	protein_coding	- && Q6NLB1.1 RecName: Full=F-box protein At2g26850	F-box
Solyc03g097380.3	14.1507	37.58	63.5923	731.235	575.344	1059.07	38.441	788.551	-4.3552	1.71755e-18	5.78788e-17	-	3	61152076	61153442	+	935	protein_coding	- && Q9C5D3.1 RecName: Full=Heavy metal-associated isoprenylated plant protein 7; Short=AtHIP07; AltName: Full=Farnesylated protein 3; Short=AtFP3; Flags: Precursor	HMA
Solyc07g008280.3	216.614	160.477	150.401	1486.06	844.028	1269.74	175.831	1199.94	-2.77136	1.72626e-18	5.80883e-17	-	7	3049805	3051279	-	1129	protein_coding	- && -	-
Solyc09g075360.3	41.3635	61.9562	70.6581	624.616	4464.14	1149.08	57.9926	2079.28	-5.16336	1.73797e-18	5.83977e-17	-	9	67512132	67515675	+	2062	protein_coding	Endoglucanase [Source:UniProtKB/TrEMBL;Acc:Q42875] && O81416.1 RecName: Full=Endoglucanase 17; AltName: Full=Endo-1,4-beta glucanase 17; Flags: Precursor	-
Solyc05g009590.3	0	0	0	568.948	653.196	225.029	0	482.391	-11.304	1.81389e-18	6.08609e-17	-	5	3794934	3798632	+	1847	protein_coding	- && Q9LS46.1 RecName: Full=Aluminum-activated malate transporter 9; Short=AtALMT9	-
Solyc06g062450.3	0	0	0	873.708	378.816	276.738	0	509.754	-11.3836	1.81851e-18	6.09278e-17	-	6	39521435	39523222	+	1300	protein_coding	- && O65924.1 RecName: Full=Putative leucine-rich repeat receptor-like protein kinase At2g19210; Flags: Precursor	-
Solyc04g015010.3	41.3635	141.179	88.8273	1133.18	1875.09	995.873	90.4566	1334.71	-3.88174	1.95538e-18	6.54195e-17	-	4	5219441	5223890	+	2110	protein_coding	- && Q8GYX3.1 RecName: Full=Microtubule-associated protein 70-5; Short=AtMAP70-5; AltName: Full=70 kDa microtubule-associated protein 5	-
Solyc01g087280.1	247.092	266.107	273.548	0	0	3.83028	262.249	1.27676	7.69141	1.9748e-18	6.59742e-17	-	1	82091601	82095910	+	1278	protein_coding	Polygalacturonase QRT2 [Source:Projected from Arabidopsis thaliana (AT3G07970) UniProtKB/Swiss-Prot;Acc:Q9SFB7] && P35336.1 RecName: Full=Polygalacturonase; Short=PG; AltName: Full=Pectinase; Flags: Precursor [Actinidia deliciosa]	-
Solyc05g052050.1	5745.17	6064.6	5812.13	1540.78	1367.16	1984.09	5873.97	1630.67	1.84889	2.11575e-18	7.05817e-17	-	5	63247063	63247767	+	705	protein_coding	- && Q40476.1 RecName: Full=Ethylene-responsive transcription factor 1; Short=NtERF1; AltName: Full=Ethylene-responsive element-binding factor 1; Short=EREBP-1	AP2
Solyc11g051060.2	77.2844	112.74	118.1	739.727	700.667	582.203	102.708	674.199	-2.71344	2.17652e-18	7.2505e-17	-	11	17352550	17356670	-	3133	protein_coding	- && Q9SYF0.1 RecName: Full=GDSL esterase/lipase 2; AltName: Full=Extracellular lipase 2; Flags: Precursor	Lipase_GDSL
Solyc05g009610.1	757.605	701.832	926.63	29.2494	0.949413	21.0665	795.356	17.0884	5.54031	2.18635e-18	7.27283e-17	-	5	3812164	3813201	-	1038	protein_coding	Probable carboxylesterase 6 [Source:Projected from Arabidopsis thaliana (AT1G68620) UniProtKB/Swiss-Prot;Acc:Q9SX25] && Q9SX25.1 RecName: Full=Probable carboxylesterase 6; AltName: Full=AtCXE6	Abhydrolase_3
Solyc08g028780.1	969.865	920.202	926.63	239.656	188.933	172.363	938.899	200.317	2.22854	2.76225e-18	9.17542e-17	-	8	40094251	40095270	-	1020	protein_coding	- && -	-
Solyc01g097800.3	338.528	306.734	349.253	0	0	0	331.505	0	10.8893	3.02845e-18	1.00453e-16	-	1	88387672	88390703	+	1452	protein_coding	DNA damage-repair/toleration protein DRT102 [Source:Projected from Arabidopsis thaliana (AT3G04880) UniProtKB/Swiss-Prot;Acc:Q05212] && Q05212.2 RecName: Full=DNA-damage-repair/toleration protein DRT102	LacAB_rpiB
Solyc06g007440.3	52.2486	70.0816	23.2162	1075.62	755.733	507.512	48.5155	779.623	-4.00682	3.04844e-18	1.00972e-16	-	6	1452508	1454294	-	1274	protein_coding	- && O22932.1 RecName: Full=CBL-interacting serine/threonine-protein kinase 11; AltName: Full=SNF1-related kinase 3.22; AltName: Full=SOS2-like protein kinase PKS5; AltName: Full=SOS3-interacting protein 4	Pkinase
Solyc06g083470.3	0	0	0	226.447	1132.65	411.755	0	590.284	-11.5952	3.05967e-18	1.012e-16	-	6	48912816	48925659	-	1361	protein_coding	- && Q9LHT0.1 RecName: Full=Tropinone reductase homolog At5g06060	adh_short
Solyc03g122300.2	2635.29	2543.25	2679.96	931.263	861.118	809.147	2619.5	867.176	1.59487	3.39916e-18	1.12111e-16	-	3	71656060	71662190	+	5252	protein_coding	- && P25795.3 RecName: Full=Aldehyde dehydrogenase family 7 member A1; AltName: Full=Antiquitin-1; AltName: Full=Turgor-responsive protein 26G	-
Solyc02g070210.3	19.5932	5.07838	23.2162	414.209	1120.31	348.556	15.9626	627.691	-5.29866	3.3992e-18	1.12111e-16	-	2	40542869	40544762	-	1637	protein_coding	Patellin-4 [Source:Projected from Arabidopsis thaliana (AT1G30690) UniProtKB/Swiss-Prot;Acc:Q94C59] && Q94C59.2 RecName: Full=Patellin-4	CRAL_TRIO_N
Solyc01g007780.3	203.552	313.844	305.849	1566.26	1542.8	1208.45	274.415	1439.17	-2.39021	3.45018e-18	1.13631e-16	-	1	1862690	1868678	-	3557	protein_coding	- && Q8LE10.2 RecName: Full=HVA22-like protein i; Short=AtHVA22i	-
Solyc09g082570.3	788.083	810.509	768.154	158.513	190.832	140.763	788.916	163.369	2.27168	3.57755e-18	1.17659e-16	-	9	68720575	68723507	+	1186	protein_coding	- && -	-
Solyc07g054800.1	415.812	329.079	273.548	0	0	0	339.48	0	10.9235	4.06595e-18	1.33533e-16	-	7	63114279	63114530	-	252	protein_coding	- && -	-
Solyc10g076250.2	512.69	461.117	520.851	4433.64	5686.99	2061.65	498.219	4060.76	-3.02692	4.47015e-18	1.46601e-16	-	10	59244801	59248929	+	1750	protein_coding	Alanine:glyoxylate aminotransferase 3 [Source:Projected from Arabidopsis thaliana (AT2G38400) UniProtKB/TrEMBL;Acc:F4ISY3] && Q9SR86.1 RecName: Full=Alanine--glyoxylate aminotransferase 2 homolog 3, mitochondrial; AltName: Full=Beta-alanine-pyruvate aminotransferase 3; Flags: Precursor	Aminotran_3
Solyc09g007130.3	1606.65	1835.33	1612.01	505.731	466.162	398.349	1684.66	456.747	1.88297	4.94117e-18	1.6182e-16	-	9	764054	768084	-	1694	protein_coding	3-methyl-2-oxobutanoate hydroxymethyltransferase [Source:UniProtKB/TrEMBL;Acc:K4CQA3] && O82357.1 RecName: Full=3-methyl-2-oxobutanoate hydroxymethyltransferase 1, mitochondrial; AltName: Full=Ketopantoate hydroxymethyltransferase 1; Flags: Precursor	-
Solyc05g008600.3	20705.7	23205.1	20919.8	7678.44	8609.28	8094.34	21610.2	8127.35	1.41086	5.52175e-18	1.80579e-16	-	5	2916661	2920226	-	1862	protein_coding	Fructose-bisphosphate aldolase [Source:UniProtKB/TrEMBL;Acc:K4BX34] && Q9ZU52.1 RecName: Full=Fructose-bisphosphate aldolase 3, chloroplastic; Short=AtFBA3; AltName: Full=Protein PIGMENT DEFECTIVE 345; Flags: Precursor	-
Solyc06g036640.3	1759.04	1698.21	1582.74	168.892	175.641	351.428	1680	231.987	2.85648	6.01263e-18	1.96356e-16	-	6	27088932	27091774	-	2011	protein_coding	- && -	-
Solyc02g086970.3	834.889	820.666	705.572	3048.54	4637.88	2963.68	787.042	3550.03	-2.17339	6.10461e-18	1.9908e-16	-	2	50173132	50178076	-	2472	protein_coding	- && Q8S528.2 RecName: Full=Aldehyde dehydrogenase family 2 member B7, mitochondrial; Short=ALDH2b; Flags: Precursor	Aldedh
Solyc08g075570.3	129.533	90.3951	127.185	5358.3	757.632	2365.2	115.704	2827.04	-4.61094	6.55957e-18	2.13618e-16	-	8	59854792	59858311	+	2595	protein_coding	- && F4KD71.1 RecName: Full=Urea-proton symporter DUR3; Short=AtDUR3; AltName: Full=High-affinity urea active transporter DUR3	-
Solyc01g066910.3	1007.96	698.785	1082.08	98.127	151.906	72.7753	929.609	107.603	3.11078	6.77649e-18	2.20373e-16	-	1	74993866	74994171	+	306	protein_coding	- && -	-
Solyc06g074530.1	7182.01	8178.22	7762.3	1830.45	1425.07	847.45	7707.51	1367.65	2.49454	6.92208e-18	2.24793e-16	-	6	46254457	46255758	+	1302	protein_coding	Arogenate dehydratase [Source:UniProtKB/TrEMBL;Acc:K4C9H1] && Q9ZUY3.1 RecName: Full=Arogenate dehydratase 3, chloroplastic; Short=AtADT3; AltName: Full=Prephenate dehydratase 1; Short=AtPDT1; Flags: Precursor	-
Solyc00g063110.3	3.26554	7.10973	0	206.633	252.544	609.972	3.45842	356.383	-6.68771	7.26287e-18	2.35532e-16	-	SL3.00SC0000532	2048	4381	-	1505	protein_coding	Non-specific lipid-transfer protein && -	-
Solyc07g017880.3	192.667	145.242	180.683	1279.42	5328.11	1810.77	172.864	2806.1	-4.021	8.06655e-18	2.6123e-16	-	7	8251739	8253855	-	1256	protein_coding	- && Q96522.1 RecName: Full=Peroxidase 45; Short=Atperox P45; AltName: Full=ATP8a; Flags: Precursor	-
Solyc12g089380.2	0	0	0	283.059	1149.74	267.162	0	566.653	-11.5362	8.19199e-18	2.64924e-16	-	12	65472886	65475356	-	1246	protein_coding	Expansin [Source:UniProtKB/TrEMBL;Acc:Q9FVH0] && Q7XWU8.2 RecName: Full=Expansin-A1; AltName: Full=Alpha-expansin-1; AltName: Full=OsEXP1; AltName: Full=OsEXPA1; AltName: Full=OsaEXPa1.16; AltName: Full=RiExA; Flags: Precursor	-
Solyc04g056620.2	0	0	0	368.92	1152.59	207.793	0	576.433	-11.5609	8.37148e-18	2.69859e-16	-	4	54537264	54541280	-	1461	protein_coding	Auxin efflux facilitator SlPIN10 [Source:UniProtKB/TrEMBL;Acc:E5KGD7] && Q9FFD0.2 RecName: Full=Auxin efflux carrier component 5; Short=AtPIN5	-
Solyc03g113910.3	507.247	459.085	461.296	4.71764	0	17.2363	475.876	7.31797	6.02505	8.37231e-18	2.69859e-16	-	3	65433008	65435436	+	838	protein_coding	- && P46689.2 RecName: Full=Gibberellin-regulated protein 1; AltName: Full=GAST1 protein homolog 1; Flags: Precursor	-
Solyc12g017870.2	0	0	0	456.668	411.096	237.477	0	368.414	-10.9151	8.37941e-18	2.69859e-16	-	12	7604297	7606497	-	1411	protein_coding	Peroxidase [Source:UniProtKB/TrEMBL;Acc:K4DDB5] && A7QEU4.2 RecName: Full=Peroxidase 5; Flags: Precursor	-
Solyc03g121200.3	0	0	0	375.524	282.925	342.81	0	333.753	-10.7726	8.57273e-18	2.75703e-16	-	3	70855253	70855736	-	333	protein_coding	- && -	-
Solyc05g055030.2	336.351	371.737	477.447	8.49176	32.2801	17.2363	395.178	19.336	4.35352	8.60715e-18	2.76427e-16	-	5	65650974	65653319	-	1097	protein_coding	- && Q7XBH4.2 RecName: Full=Myb-related protein Myb4; AltName: Full=OsMyb4; AltName: Full=Transcription factor RLTR1	Myb_DNA-binding
Solyc08g006850.3	0	0	0	141.529	1105.12	603.269	0	616.639	-11.6582	8.68429e-18	2.7852e-16	-	8	1388439	1408950	+	2539	protein_coding	- && Q2MY43.1 RecName: Full=Patatin-08; AltName: Full=Patatin group D-1; Flags: Precursor	-
Solyc07g043420.3	254.712	233.605	337.14	1795.54	11808.8	4266.93	275.153	5957.09	-4.43624	8.73113e-18	2.79637e-16	-	7	57307290	57308879	+	1286	protein_coding	Steroid 16alpha-hydroxylase [Source:UniProtKB/TrEMBL;Acc:Q40131] && P24397.1 RecName: Full=Hyoscyamine 6-dioxygenase; AltName: Full=Hyoscyamine 6-beta-hydroxylase	2OG-FeII_Oxy
Solyc03g115690.1	37.0094	59.9249	26.2444	1104.87	671.235	384.943	41.0596	720.35	-4.13262	9.04093e-18	2.8916e-16	-	3	66814204	66815202	-	999	protein_coding	- && -	-
Solyc11g066490.1	58.7797	38.5957	28.2632	478.369	1804.83	620.505	41.8795	967.903	-4.53223	1.02726e-17	3.28102e-16	-	11	52538200	52538826	+	627	protein_coding	- && Q9FNH6.1 RecName: Full=NDR1/HIN1-Like protein 3	-
Solyc10g083880.2	127.356	84.3011	78.7333	2146.53	626.613	1268.78	96.7968	1347.31	-3.7998	1.05088e-17	3.35187e-16	-	10	63730879	63732662	+	1076	protein_coding	- && P25818.1 RecName: Full=Aquaporin TIP1-1; AltName: Full=Aquaporin TIP; AltName: Full=Gamma-tonoplast intrinsic protein; Short=Gamma-TIP; AltName: Full=Tonoplast intrinsic protein 1-1; Short=AtTIP1;1; AltName: Full=Tonoplast intrinsic protein, root-specific RB7; Contains: RecName: Full=Aquaporin TIP1-1, N-terminally processed	-
Solyc08g080060.3	0	0	0	405.717	513.633	223.114	0	380.821	-10.9629	1.0613e-17	3.38045e-16	-	8	63517656	63519058	+	759	protein_coding	- && Q9LQ07.1 RecName: Full=Expansin-A18; Short=AtEXPA18; AltName: Full=Alpha-expansin-18; Short=At-EXP18; Short=AtEx18; AltName: Full=Ath-ExpAlpha-1.25; Flags: Precursor	-
Solyc09g074760.1	0	0	0	262.301	550.66	311.21	0	374.724	-10.9396	1.1112e-17	3.53455e-16	-	9	66995048	66995464	-	417	protein_coding	NF-YB5 [Source:Projected from Arabidopsis thaliana (AT2G47810) UniProtKB/TrEMBL;Acc:A0A178VUG0] && O82248.1 RecName: Full=Nuclear transcription factor Y subunit B-5; Short=AtNF-YB-5	-
Solyc05g054560.3	1314.92	1838.37	1698.82	110.393	220.264	269.077	1617.37	199.911	3.01641	1.20029e-17	3.81273e-16	-	5	65301868	65303807	+	905	protein_coding	CASP-like protein [Source:UniProtKB/TrEMBL;Acc:K4C2D4] && B9SR15.1 RecName: Full=CASP-like protein 4C1; Short=RcCASPL4C1	-
Solyc04g082840.3	3.26554	18.2822	13.1222	286.833	1410.83	383.986	11.5566	693.882	-5.90226	1.21146e-17	3.84295e-16	-	4	66455415	66457486	-	1318	protein_coding	B2-type cyclin dependent kinase [Source:UniProtKB/TrEMBL;Acc:Q9FSH4] && Q38775.1 RecName: Full=Cell division control protein 2 homolog D	Pkinase
Solyc11g067320.1	0	0	0	281.172	780.418	270.035	0	443.875	-11.1839	1.21349e-17	3.84414e-16	-	11	53356945	53357913	-	969	protein_coding	Sulfotransferase [Source:UniProtKB/TrEMBL;Acc:K4D9Y9] && P52838.1 RecName: Full=Flavonol sulfotransferase-like [Flaveria bidentis]	Sulfotransfer_1
Solyc04g078990.3	19.5932	7.10973	27.2538	1111.48	389.259	347.598	17.9856	616.111	-5.09861	1.24551e-17	3.94022e-16	-	4	63693086	63698600	-	3320	protein_coding	Hexosyltransferase [Source:UniProtKB/TrEMBL;Acc:K4BUY3] && Q8GWW4.1 RecName: Full=UDP-glucuronate:xylan alpha-glucuronosyltransferase 2; Short=UDP-GlcA:xylan glucuronyltransferase 2; AltName: Full=Glycogenin-like protein 2; AltName: Full=Plant glycogenin-like starch initiation protein 3; AltName: Full=Protein GLUCURONIC ACID SUBSTITUTION OF XYLAN 2; Short=AtGUX2	Glyco_transf_8
Solyc04g072940.3	56.6027	50.7838	30.282	374.581	807.951	551.56	45.8895	578.031	-3.6563	1.25459e-17	3.96355e-16	-	4	60027786	60028793	+	799	protein_coding	- && -	-
Solyc08g076400.3	668.347	481.43	560.218	13.2094	48.4201	43.0907	569.998	34.9067	4.02975	1.26518e-17	3.99159e-16	-	8	60536915	60540818	-	1601	protein_coding	- && Q9C616.1 RecName: Full=Probable transcription factor KAN2; AltName: Full=Protein KANADI 2	Myb_DNA-binding
Solyc10g009120.2	874.076	1059.35	1084.1	96.2399	98.739	191.514	1005.84	128.831	2.96513	1.26771e-17	3.99415e-16	-	10	3119748	3119954	-	207	protein_coding	- && -	-
Solyc09g014820.3	0	0	0	434.967	201.276	586.99	0	407.744	-11.0614	1.2762e-17	4.01547e-16	-	9	7021165	7026317	-	860	protein_coding	- && Q9LZX1.1 RecName: Full=Protein LURP-one-related 15	-
Solyc03g111170.3	2455.69	2177.61	2186.36	369.863	391.158	163.744	2273.22	308.255	2.88243	1.28917e-17	4.05079e-16	-	3	63301903	63308078	-	2202	protein_coding	4-coumarate--CoA ligase-like 9 [Source:Projected from Arabidopsis thaliana (AT5G63380) UniProtKB/Swiss-Prot;Acc:Q84P23] && Q84P23.2 RecName: Full=4-coumarate--CoA ligase-like 9; AltName: Full=4-coumarate--CoA ligase isoform 4; Short=At4CL4	AMP-binding
Solyc05g008580.3	150.215	143.21	188.758	786.903	1360.51	933.631	160.728	1027.01	-2.67552	1.32034e-17	4.14313e-16	-	5	2892000	2899926	-	3135	protein_coding	- && F4HXY7.1 RecName: Full=CDP-diacylglycerol--serine O-phosphatidyltransferase 1; AltName: Full=Phosphatidylserine synthase 1	-
Solyc07g063650.3	5195.47	5248	5057.1	1886.11	1531.4	1399.01	5166.86	1605.51	1.68623	1.35048e-17	4.23199e-16	-	7	66186965	66200643	-	4180	protein_coding	Ubiquitin carboxyl-terminal hydrolase 14 [Source:Projected from Arabidopsis thaliana (AT3G20630) UniProtKB/Swiss-Prot;Acc:Q8L6Y1] && Q8L6Y1.1 RecName: Full=Ubiquitin carboxyl-terminal hydrolase 14; AltName: Full=Deubiquitinating enzyme 14; Short=AtUBP14; AltName: Full=TITAN-6 protein; AltName: Full=Ubiquitin thioesterase 14; AltName: Full=Ubiquitin-specific-processing protease 14	-
Solyc11g010400.2	0	0	0	1118.08	396.855	180.023	0	564.986	-11.532	1.37296e-17	4.29664e-16	-	11	3473027	3482580	+	2174	protein_coding	- && P24397.1 RecName: Full=Hyoscyamine 6-dioxygenase; AltName: Full=Hyoscyamine 6-beta-hydroxylase	2OG-FeII_Oxy
Solyc12g009180.2	3288.4	4095.2	4402	638.769	995.935	976.722	3928.53	870.475	2.17418	1.39002e-17	4.34419e-16	-	12	2472721	2480656	-	2586	protein_coding	- && -	-
Solyc02g088460.3	5899.74	5144.4	6434.93	1670.05	2017.5	1575.2	5826.36	1754.25	1.73173	1.4256e-17	4.4494e-16	-	2	51182609	51185432	-	1112	protein_coding	Chorismate mutase 1, chloroplastic [Source:Projected from Arabidopsis thaliana (AT3G29200) UniProtKB/Swiss-Prot;Acc:P42738] && P42738.3 RecName: Full=Chorismate mutase 1, chloroplastic; Short=AtCM1; AltName: Full=CM-1; Flags: Precursor	-
Solyc11g006640.2	161.1	164.539	113.053	1072.79	692.122	1079.18	146.231	948.032	-2.69707	1.4621e-17	4.55719e-16	-	11	1242284	1247330	+	3215	protein_coding	- && Q60CZ8.1 RecName: Full=Putative late blight resistance protein homolog R1A-10 >Q6L438.2 RecName: Full=Putative late blight resistance protein homolog R1A-6	NB-ARC
Solyc03g033710.3	21.7703	36.5643	80.7521	688.776	1526.66	676.044	46.3622	963.826	-4.37552	1.50112e-17	4.67256e-16	-	3	5340870	5344167	+	1453	protein_coding	Peroxidase [Source:UniProtKB/TrEMBL;Acc:K4BFP3] && Q9FJZ9.1 RecName: Full=Peroxidase 72; Short=Atperox P72; AltName: Full=ATP6a; AltName: Full=PRXR8; Flags: Precursor	-
Solyc10g017570.3	957.891	801.368	687.402	152.852	147.159	99.5873	815.554	133.199	2.61392	1.54922e-17	4.81583e-16	-	10	5518178	5525924	-	1453	protein_coding	- && B2X050.1 RecName: Full=(+)-neomenthol dehydrogenase; AltName: Full=Menthone:neomenthol reductase 1; Short=CaMNR1	adh_short
Solyc02g084980.3	0	0	0	635.938	195.579	419.416	0	416.978	-11.0937	1.55456e-17	4.82599e-16	-	2	48648845	48651237	-	2226	protein_coding	Hexosyltransferase [Source:UniProtKB/TrEMBL;Acc:K4BB12] && C7G304.1 RecName: Full=Galactinol synthase 2; Short=GolS-2; Short=SlGolS2	Glyco_transf_8
Solyc01g109500.3	206.817	260.013	187.749	1401.14	969.351	1050.45	218.193	1140.32	-2.38566	1.63323e-17	5.06345e-16	-	1	96340925	96342459	-	1429	protein_coding	- && Q0JEP3.2 RecName: Full=BURP domain-containing protein 5; Short=OsBURP05; Flags: Precursor	-
Solyc07g063165.1	839.244	661.205	827.709	93.4093	133.867	152.254	776.053	126.51	2.61702	1.63759e-17	5.0702e-16	-	7	65857674	65861639	+	2465	protein_coding	- && Q9C920.1 RecName: Full=3-deoxy-manno-octulosonate cytidylyltransferase, mitochondrial; AltName: Full=CMP-2-keto-3-deoxyoctulosonic acid synthase; Short=AtCKS; Short=CMP-KDO synthase; Flags: Precursor	-
Solyc01g107390.3	283.013	343.298	211.974	5027.12	2418.16	1626.91	279.429	3024.06	-3.43598	1.72331e-17	5.3285e-16	-	1	94843134	94845241	-	1887	protein_coding	- && O82333.1 RecName: Full=Probable indole-3-acetic acid-amido synthetase GH3.1; AltName: Full=Auxin-responsive GH3-like protein 1; Short=AtGH3-1	-
Solyc01g104910.3	817.473	454.007	466.343	6049.91	3161.55	3609.08	579.275	4273.51	-2.88342	1.74208e-17	5.37939e-16	-	1	93119035	93123953	-	2887	protein_coding	- && -	-
Solyc01g097240.3	2588.48	2722.01	2159.11	93.4093	343.688	118.739	2489.87	185.279	3.74829	1.78143e-17	5.49362e-16	-	1	88037596	88038180	-	475	protein_coding	Pathogenesis-related protein P2 [Source:UniProtKB/Swiss-Prot;Acc:P32045] && P32045.1 RecName: Full=Pathogenesis-related protein P2; Flags: Precursor	-
Solyc06g007930.3	4083.01	4571.56	4077.98	759.541	1176.32	631.996	4244.18	855.953	2.30987	1.83165e-17	5.64101e-16	-	6	1802041	1807694	+	1701	protein_coding	- && Q9FKB6.1 RecName: Full=BTB/POZ domain-containing protein At5g48800	-
Solyc12g010710.1	490.919	875.512	696.487	97.1835	105.385	85.2237	687.64	95.9307	2.84172	1.83975e-17	5.65844e-16	-	12	3635258	3635680	-	423	protein_coding	- && -	-
Solyc02g093270.3	20001.4	19215.6	20018.4	5015.8	3183.38	2208.16	19745.1	3469.11	2.50885	1.87652e-17	5.76392e-16	-	2	54815435	54817854	-	2087	protein_coding	- && Q8H9B6.1 RecName: Full=Caffeoyl-CoA O-methyltransferase; AltName: Full=Trans-caffeoyl-CoA 3-O-methyltransferase; Short=CCoAMT; Short=CCoAOMT	-
Solyc06g072870.2	535.548	283.374	426.977	1.88706	12.3424	19.1514	415.3	11.1269	5.2234	1.90194e-17	5.83428e-16	-	6	45078811	45082375	-	2925	protein_coding	- && Q9ZQ96.1 RecName: Full=UDP-glycosyltransferase 73C3	UDPGT
Solyc06g072620.3	0	0	0	240.6	323.75	461.549	0	341.966	-10.8076	1.99092e-17	6.0992e-16	-	6	44927427	44941214	+	1746	protein_coding	- && Q9SMM5.1 RecName: Full=Bidirectional sugar transporter SWEET11; Short=AtSWEET11; AltName: Full=Protein SUGARS WILL EVENTUALLY BE EXPORTED TRANSPORTERS 11	-
Solyc12g014420.2	475.68	402.208	362.375	2116.33	1868.45	1454.55	413.421	1813.11	-2.13309	2.03404e-17	6.2231e-16	-	12	5390271	5405218	+	1786	protein_coding	- && Q9FJU9.1 RecName: Full=Glucan endo-1,3-beta-glucosidase 13; AltName: Full=(1->3)-beta-glucan endohydrolase 13; Short=(1->3)-beta-glucanase 13; AltName: Full=Beta-1,3-endoglucanase 13; Short=Beta-1,3-glucanase 13; Flags: Precursor	Glyco_hydro_17
Solyc03g093550.1	534.46	706.91	710.619	111.336	113.93	131.187	650.663	118.818	2.45341	2.0424e-17	6.24046e-16	-	3	56355720	56356445	-	726	protein_coding	- && Q40478.1 RecName: Full=Ethylene-responsive transcription factor 5; AltName: Full=Ethylene-responsive element-binding factor 4; Short=EREBP-4; AltName: Full=Ethylene-responsive element-binding factor 5 homolog; AltName: Full=NtERF4	AP2
Solyc12g005680.2	0	0	0	592.536	556.356	164.702	0	437.865	-11.1643	2.05979e-17	6.28533e-16	-	12	358365	372679	+	6422	protein_coding	Potassium transporter [Source:Projected from Arabidopsis thaliana (AT4G13420) UniProtKB/TrEMBL;Acc:Q53XI1] && Q5JK32.2 RecName: Full=Potassium transporter 5; AltName: Full=OsHAK5	-
Solyc05g009620.3	0	0	0	465.16	301.913	251.841	0	339.638	-10.7978	2.07036e-17	6.3093e-16	-	5	3818983	3821883	+	2000	nontranslating_CDS	- && P0CW98.1 RecName: Full=Protein PLANT CADMIUM RESISTANCE 9; Short=AtPCR9	-
Solyc06g066830.3	0	0	0	6854.74	1982.37	1183.56	0	3340.22	-14.0956	2.21684e-17	6.74684e-16	-	6	42144081	42166415	-	2041	protein_coding	- && Q945B6.1 RecName: Full=Probable 2-oxoglutarate-dependent dioxygenase AOP1.2	2OG-FeII_Oxy
Solyc02g062960.3	16.3277	30.4703	21.1974	295.324	1253.23	427.076	22.6651	658.542	-4.8591	2.27964e-17	6.92892e-16	-	2	35472018	35481648	-	677	protein_coding	- && Q9ZU70.1 RecName: Full=Homeobox-leucine zipper protein ATHB-21; AltName: Full=HD-ZIP protein ATHB-21; AltName: Full=Homeodomain transcription factor ATHB-21	Homeobox
Solyc03g123580.3	436.494	413.38	428.996	1657.78	1783	2753.01	426.29	2064.6	-2.27597	2.34066e-17	7.1051e-16	-	3	71885785	71899203	-	13262	protein_coding	- && Q9LUM0.1 RecName: Full=1-phosphatidylinositol-3-phosphate 5-kinase FAB1B; Short=Phosphatidylinositol 3-phosphate 5-kinase; AltName: Full=FYVE finger-containing phosphoinositide kinase; AltName: Full=PIKfyve; AltName: Full=Phosphatidylinositol 3-phosphate 5-kinase type III; Short=PIPkin-III; Short=Type III PIP kinase; AltName: Full=Protein FORMS APLOID AND BINUCLEATE CELLS 1B	-
Solyc09g010440.3	13283.1	14728.3	14747.4	3225.92	4770.8	4338.75	14252.9	4111.83	1.79342	2.40858e-17	7.30173e-16	-	9	3810027	3813133	+	861	protein_coding	- && Q9FVI2.1 RecName: Full=Actin-depolymerizing factor 1; Short=ADF-1	Cofilin_ADF
Solyc01g095530.2	325.465	476.352	411.836	0	0	1.91514	404.551	0.63838	9.31822	2.45034e-17	7.41516e-16	-	1	86637406	86637952	-	547	protein_coding	- && -	-
Solyc05g041530.3	3093.55	3294.85	3434.99	835.023	575.344	937.461	3274.47	782.61	2.06493	2.45237e-17	7.41516e-16	-	5	52953609	52969875	+	2853	protein_coding	- && Q56WF8.2 RecName: Full=Serine carboxypeptidase-like 48; Flags: Precursor	Peptidase_S10
Solyc02g076890.1	0	0	0	229.277	840.231	288.229	0	452.579	-11.2119	2.53394e-17	7.65184e-16	-	2	42573802	42574212	+	411	protein_coding	- && -	-
ENSRNA050029741	18.5047	15.2351	14.1316	136.812	1126.95	913.522	15.9572	725.762	-5.5083	2.67494e-17	8.06713e-16	5_8S_rRNA	3	35365262	35365417	-	156	rRNA	5.8S ribosomal RNA && Q8TGM5.1 RecName: Full=Putative uncharacterized protein ART3; AltName: Full=Antisense to ribosomal RNA transcript protein 3	-
Solyc07g053740.1	4563.05	5259.17	4767.4	1226.59	1597.86	1607.76	4863.21	1477.4	1.71888	2.81099e-17	8.46647e-16	-	7	62294729	62295406	+	678	protein_coding	- && Q9LW49.1 RecName: Full=Ethylene-responsive transcription factor 4; AltName: Full=Ethylene-responsive element-binding factor 3; Short=EREBP-3; AltName: Full=Ethylene-responsive element-binding factor 4 homolog; AltName: Full=NsERF3	AP2
Solyc04g071990.3	2194.44	2420.36	2251.97	9563.61	6812.04	7096.55	2288.92	7824.07	-1.77323	2.86372e-17	8.61414e-16	-	4	59098772	59140862	-	4358	protein_coding	- && Q9SQI2.2 RecName: Full=Protein GIGANTEA	-
novel.51	5.44257	10.1568	27.2538	680.284	312.357	373.452	14.2844	455.365	-4.98862	2.90976e-17	8.74131e-16	-	1	91268284	91270606	+	1950	-	- && - && -	-
Solyc06g060070.3	0	0	0	332.122	666.488	206.835	0	401.815	-11.0403	2.93039e-17	8.79191e-16	-	6	38095058	38098172	-	1506	protein_coding	- && Q0WPW4.1 RecName: Full=1-aminocyclopropane-1-carboxylate oxidase 5; Short=ACC oxidase 5; Short=AtACO5	2OG-FeII_Oxy
Solyc01g108360.3	3263.36	3340.56	3351.21	1.88706	31.3306	7.66056	3318.38	13.6261	7.92803	3.08142e-17	9.23315e-16	-	1	95592188	95593039	+	755	protein_coding	- && -	-
Solyc12g005790.2	0	0	0	2774.92	1115.56	593.693	0	1494.72	-12.9356	3.09548e-17	9.26335e-16	-	12	440265	443228	-	1819	protein_coding	Peroxidase [Source:UniProtKB/TrEMBL;Acc:K4DBB7] && Q43735.1 RecName: Full=Peroxidase 27; Short=Atperox P27; AltName: Full=ATP12a; AltName: Full=PRXR7; Flags: Precursor	-
Solyc01g105810.3	14.1507	8.12541	19.1786	305.703	509.835	204.92	13.8182	340.153	-4.62146	3.19578e-17	9.55119e-16	-	1	93734583	93749543	+	2195	protein_coding	- && Q9LXC0.1 RecName: Full=Guanosine nucleotide diphosphate dissociation inhibitor At5g09550; Short=AtGDI	SRF-TF
Solyc06g071220.1	0	0	0	197.198	348.435	642.53	0	396.054	-11.0194	3.29796e-17	9.84393e-16	-	6	43953036	43953443	+	408	protein_coding	- && -	-
Solyc03g083100.3	466.972	454.007	653.083	32.08	61.7119	64.1572	524.687	52.6497	3.31736	3.32165e-17	9.90193e-16	-	3	54347779	54350875	-	1862	nontranslating_CDS	- && Q9SF32.1 RecName: Full=Protein IQ-DOMAIN 1	IQ
Solyc06g083760.3	521.398	525.104	515.804	1616.26	1718.44	1546.48	520.769	1627.06	-1.64356	3.33698e-17	9.93489e-16	-	6	49136675	49147310	+	4269	protein_coding	- && Q9FNC7.2 RecName: Full=Probable inactive histone-lysine N-methyltransferase SUVR2; AltName: Full=Protein SET DOMAIN GROUP 18; AltName: Full=Suppressor of variegation 3-9-related protein 2; Short=Su(var)3-9-related protein 2	SET
Solyc05g005700.3	4388.88	4188.65	4230.4	370.807	603.827	941.291	4269.31	638.642	2.74098	3.65018e-17	1.08534e-15	-	5	514496	518943	-	1887	protein_coding	- && Q8S528.2 RecName: Full=Aldehyde dehydrogenase family 2 member B7, mitochondrial; Short=ALDH2b; Flags: Precursor	Aldedh
Solyc09g098510.3	63786.9	68273.7	71908.7	22971.2	18976.9	14469.8	67989.8	18806	1.85413	3.92347e-17	1.16512e-15	-	9	72820384	72825406	-	1202	protein_coding	- && -	-
Solyc01g089960.3	316.757	246.809	269.51	0	0	0	277.692	0	10.6337	3.99868e-17	1.18593e-15	-	1	83530181	83535791	-	1197	nontranslating_CDS	- && Q93WY4.1 RecName: Full=Probable WRKY transcription factor 12; AltName: Full=WRKY DNA-binding protein 12	WRKY
Solyc06g074320.3	290.633	260.013	560.218	6286.73	2081.11	4538.88	370.288	4302.24	-3.53818	4.02962e-17	1.19359e-15	-	6	46083011	46096021	+	4358	protein_coding	- && Q53Q70.1 RecName: Full=Transcription factor TGAL4; AltName: Full=bZIP transcription factor 79; Short=OsbZIP79	-
Solyc03g097030.3	432.14	574.872	381.554	11.3223	16.14	0	462.855	9.15412	5.65868	4.20592e-17	1.24422e-15	-	3	60815511	60820606	-	2256	protein_coding	4-coumarate:coenzyme A ligase, Flavonoid biosynthesi [Source: Projected from Oryza sativa (Os02g0697400)] && P31687.2 RecName: Full=4-coumarate--CoA ligase 2; Short=4CL 2; AltName: Full=4-coumaroyl-CoA synthase 2; AltName: Full=Clone 4CL16	AMP-binding
Solyc01g010080.3	291.721	294.546	431.014	4331.74	1498.17	4228.63	339.094	3352.85	-3.30548	4.26401e-17	1.25981e-15	-	1	4736565	4747053	+	2136	protein_coding	- && P92960.1 RecName: Full=Potassium channel KAT3; AltName: Full=AKT4; AltName: Full=AtKC1; AltName: Full=Potassium channel TKC	Ion_trans
Solyc11g005150.2	23.9473	25.3919	6.05641	1032.22	766.177	235.562	18.4652	677.986	-5.20061	4.44468e-17	1.31152e-15	-	11	138523	140798	+	1449	protein_coding	Leucine-rich repeat extensin-like protein 2 [Source:Projected from Arabidopsis thaliana (AT1G62440) UniProtKB/Swiss-Prot;Acc:O48809] && O48809.1 RecName: Full=Leucine-rich repeat extensin-like protein 2; Short=AtLRX2; Short=LRR/EXTENSIN2; AltName: Full=Cell wall hydroxyproline-rich glycoprotein; Flags: Precursor	-
Solyc10g074830.1	0	0	0	439.684	801.305	149.381	0	463.457	-11.2462	4.5593e-17	1.34364e-15	-	10	58602969	58604179	-	381	protein_coding	- && -	-
Solyc02g090450.3	207.906	127.975	254.369	1488.89	1975.73	1069.61	196.75	1511.41	-2.94153	4.56861e-17	1.34467e-15	-	2	52635417	52639670	+	3855	protein_coding	Peroxidase [Source:UniProtKB/TrEMBL;Acc:K4BCJ4] && Q9FX85.1 RecName: Full=Peroxidase 10; Short=Atperox P10; AltName: Full=ATP5a; Flags: Precursor	-
Solyc04g040130.1	9945.74	9316.79	10214.1	2735.29	2165.61	1410.5	9825.56	2103.8	2.22352	4.73485e-17	1.39184e-15	-	4	12036164	12037291	+	1128	protein_coding	- && Q8GZC3.1 RecName: Full=Delta(12)-fatty-acid desaturase FAD2	-
Solyc06g062430.3	71.8419	151.336	96.9025	1052.03	911.437	2711.84	106.693	1558.44	-3.86788	4.83344e-17	1.41903e-15	-	6	39493055	39496715	-	1264	protein_coding	- && Q8L799.1 RecName: Full=Inositol oxygenase 1; AltName: Full=Myo-inositol oxygenase 1; Short=AtMIOX1; Short=MI oxygenase 1	-
Solyc12g011160.2	5088.8	4986.97	4996.54	1487.94	1636.79	1088.76	5024.1	1404.5	1.83879	4.84294e-17	1.42003e-15	-	12	4007787	4013109	+	1753	protein_coding	- && Q9SHJ8.2 RecName: Full=3-hydroxyisobutyryl-CoA hydrolase-like protein 5	-
Solyc06g005160.3	32505.2	34094.2	34491.2	9668.34	12870.2	9264.49	33696.9	10601	1.66841	4.91129e-17	1.43825e-15	-	6	181784	185338	+	1266	protein_coding	Cytosolic ascorbate peroxidase 1 [Source:UniProtKB/TrEMBL;Acc:Q3I5C4] && Q05431.2 RecName: Full=L-ascorbate peroxidase 1, cytosolic; Short=AP; Short=AtAPx01	-
Solyc02g094030.3	1742.71	1663.68	1677.63	428.362	494.644	325.574	1694.67	416.193	2.02561	5.14364e-17	1.5044e-15	-	2	55319565	55322314	+	961	protein_coding	- && Q9LK32.1 RecName: Full=Uncharacterized protein At3g27210	-
Solyc02g067040.3	10.8851	5.07838	15.141	298.155	301.913	182.896	10.3682	260.988	-4.6539	5.432e-17	1.58674e-15	-	2	37853439	37858477	+	1977	protein_coding	- && Q8VZF6.1 RecName: Full=Protein ENHANCED DISEASE RESISTANCE 2-like	-
Solyc06g007910.3	28.3013	9.14108	40.3761	434.967	2069.72	582.203	25.9395	1028.96	-5.31008	5.50967e-17	1.60741e-15	-	6	1794510	1795843	+	615	protein_coding	- && P46690.2 RecName: Full=Gibberellin-regulated protein 4; AltName: Full=GAST1 protein homolog 4; Flags: Precursor	-
Solyc04g076480.3	130.622	80.2384	114.062	1035.99	597.181	776.589	108.307	803.255	-2.89146	5.55084e-17	1.61739e-15	-	4	61426375	61435893	-	4657	protein_coding	- && Q05609.1 RecName: Full=Serine/threonine-protein kinase CTR1; AltName: Full=Protein CONSTITUTIVE TRIPLE RESPONSE1	Pkinase_Tyr
Solyc05g006830.3	2259.75	2222.3	2525.52	80.1999	256.342	296.847	2335.86	211.129	3.46788	5.76449e-17	1.67755e-15	-	5	1452279	1454580	-	2046	protein_coding	Thioredoxin [Source:UniProtKB/TrEMBL;Acc:K4BWK9] && Q38879.2 RecName: Full=Thioredoxin H2; Short=AtTrxh2; AltName: Full=Thioredoxin 2; Short=AtTRX2	-
Solyc08g062680.1	1071.1	1120.29	1114.38	324.574	315.205	271.95	1101.92	303.91	1.85828	6.03523e-17	1.75414e-15	-	8	51841433	51841906	-	474	protein_coding	- && -	-
Solyc02g064690.3	58.7797	60.9405	52.4889	1079.4	454.769	487.403	57.403	673.856	-3.55341	6.10454e-17	1.77207e-15	-	2	36328238	36339740	-	3897	protein_coding	- && Q42381.1 RecName: Full=Probable N-acetyltransferase HLS1; AltName: Full=Protein CONSTITUTIVE PHOTOMORPHOGENIC 3; AltName: Full=Protein HOOKLESS 1; AltName: Full=Protein UNUSUAL SUGAR RESPONSE 2	Acetyltransf_1
Solyc04g007580.1	789.172	721.13	530.945	96.2399	42.7236	80.4359	680.416	73.1331	3.21767	6.11471e-17	1.77281e-15	-	4	1262147	1262641	+	495	protein_coding	- && -	-
Solyc12g010670.1	729.304	764.804	902.405	110.393	170.894	99.5873	798.837	126.958	2.65356	6.18326e-17	1.79045e-15	-	12	3614788	3615462	+	675	protein_coding	- && Q6R567.1 RecName: Full=E3 ubiquitin-protein ligase RMA1H1; AltName: Full=Protein RING membrane-anchor 1 homolog 1	zf-C3HC4
Solyc11g005290.2	60.9567	103.599	83.7803	635.938	667.438	1441.14	82.7787	914.84	-3.4653	6.22648e-17	1.80072e-15	-	11	227134	246379	+	2418	protein_coding	- && Q6NML0.1 RecName: Full=E3 ubiquitin-protein ligase ATL76; AltName: Full=RING-H2 finger protein ATL76; AltName: Full=RING-type E3 ubiquitin transferase ATL76	-
Solyc09g075900.3	75.1074	48.7524	16.1504	634.995	746.239	1134.72	46.6701	838.651	-4.17012	6.35431e-17	1.83541e-15	-	9	67962504	67966251	-	1573	protein_coding	- && Q9S7X6.1 RecName: Full=Thermospermine synthase ACAULIS5	-
Solyc08g061010.3	0	0	0	309.477	189.883	663.596	0	387.652	-10.9885	7.07898e-17	2.04219e-15	-	8	46457009	46472636	-	2103	protein_coding	- && Q9SZY4.1 RecName: Full=Protein NRT1/ PTR FAMILY 6.2; Short=AtNPF6.2; AltName: Full=Nitrate transporter 1.4	-
Solyc11g020670.1	1614.26	1559.06	1541.36	8391.74	4944.54	9889.78	1571.56	7742.02	-2.30052	7.26851e-17	2.09427e-15	-	11	11841566	11842690	-	1125	protein_coding	- && Q9C7G4.1 RecName: Full=Transcription factor TCP22	TCP
Solyc07g009280.3	0	0	0	143.416	929.476	388.773	0	487.222	-11.3183	7.33248e-17	2.11008e-15	-	7	4342306	4343113	-	518	nontranslating_CDS	- && P82787.2 RecName: Full=Defensin-like protein 19; AltName: Full=Defensin AMP1 protein; AltName: Full=Low-molecular-weight cysteine-rich protein 78; Short=Protein LCR78; AltName: Full=Plant defensin 1.4; Flags: Precursor	-
Solyc08g008420.3	301.518	267.123	287.679	982.213	1251.33	1395.18	285.44	1209.57	-2.08336	7.44655e-17	2.14026e-15	-	8	2834221	2837875	+	2447	protein_coding	Mitochondrial pyruvate carrier [Source:UniProtKB/TrEMBL;Acc:K4CIX6] && Q949R9.1 RecName: Full=Mitochondrial pyruvate carrier 1; Short=AtMPC1	-
Solyc12g100110.1	0	0	0	336.84	479.454	189.599	0	335.297	-10.7792	7.68227e-17	2.20529e-15	-	12	67939490	67940743	+	1254	protein_coding	- && -	-
Solyc04g015590.3	204.64	171.649	227.115	846.345	1681.41	1363.58	201.135	1297.11	-2.68907	7.92867e-17	2.27321e-15	-	4	5889737	5892679	+	1086	protein_coding	- && Q9SEV0.2 RecName: Full=Anthocyanidin reductase; Short=AtANR; AltName: Full=Anthocyanin spotted testa; Short=ast; AltName: Full=Protein BANYULS	Epimerase
Solyc09g075040.3	120.825	103.599	88.8273	949.19	535.469	700.941	104.417	728.533	-2.80332	7.99925e-17	2.29062e-15	-	9	67259148	67263721	-	1446	protein_coding	E3 ubiquitin-protein ligase [Source:UniProtKB/TrEMBL;Acc:K4CV81] && B8B5U8.1 RecName: Full=Probable E3 ubiquitin-protein ligase BAH1-like 1; AltName: Full=RING-type E3 ubiquitin transferase BAH1-like 1	-
Solyc05g012340.3	2252.13	2309.65	2446.79	415.153	689.274	543.9	2336.19	549.442	2.08816	8.2965e-17	2.37282e-15	-	5	5602072	5606182	-	1528	protein_coding	- && Q6DKC0.1 RecName: Full=Erlin-2-B; AltName: Full=Endoplasmic reticulum lipid raft-associated protein 2-B; AltName: Full=Stomatin-prohibitin-flotillin-HflC/K domain-containing protein 2-B; Short=SPFH domain-containing protein 2-B	-
Solyc04g015120.3	0	0	0	383.073	301.913	211.623	0	298.87	-10.6133	8.95373e-17	2.55764e-15	-	4	5290532	5292470	+	1097	protein_coding	- && -	-
Solyc07g005540.1	1539.16	1566.17	1541.36	506.675	432.932	386.858	1548.9	442.155	1.80856	9.01071e-17	2.57076e-15	-	7	436095	438662	+	2568	protein_coding	- && C0LGK9.1 RecName: Full=Probable LRR receptor-like serine/threonine-protein kinase At2g24230; Flags: Precursor	Pkinase_Tyr
Solyc10g086570.3	125.179	152.351	221.059	975.609	858.27	1071.52	166.196	968.466	-2.54198	9.06859e-17	2.5841e-15	-	10	65482767	65483435	-	586	protein_coding	- && -	-
Solyc03g031940.3	453.91	405.255	343.196	16.04	42.7236	34.4725	400.787	31.0787	3.68911	9.09859e-17	2.58948e-15	-	3	4431088	4434347	-	2102	protein_coding	- && Q9LPK6.1 RecName: Full=Probable acyl-activating enzyme 9; AltName: Full=AMP-binding protein 9; Short=AtAMPBP9	AMP-binding
Solyc04g011767.1	821.827	495.65	811.559	115.111	110.132	88.0965	709.679	104.446	2.76421	9.13199e-17	2.59581e-15	-	4	4220570	4221255	+	373	protein_coding	- && -	-
Solyc02g093700.3	272.128	478.383	430.005	24.5317	4.74707	18.1938	393.505	15.8242	4.63608	9.23668e-17	2.62236e-15	-	2	55085889	55087978	+	1255	protein_coding	- && P57758.1 RecName: Full=Cystinosin homolog	-
Solyc01g102900.3	355.944	666.283	477.447	10698.7	3022.93	4441.21	499.891	6054.27	-3.59812	9.35477e-17	2.65265e-15	-	1	91446646	91447620	-	892	protein_coding	- && P92996.1 RecName: Full=Germin-like protein subfamily 1 member 20; AltName: Full=GLP2a copy 2; AltName: Full=GLP2b; AltName: Full=Germin type 2; Short=At-GERM2; Short=AtGER2; Flags: Precursor	-
Solyc01g068280.3	102.32	67.0346	94.8837	713.308	744.34	471.124	88.0795	642.924	-2.86847	9.60215e-17	2.71948e-15	-	1	77224059	77238224	-	4028	protein_coding	Protein CHROMATIN REMODELING 24 [Source:Projected from Arabidopsis thaliana (AT5G63950) UniProtKB/Swiss-Prot;Acc:Q8W103] && Q8W103.1 RecName: Full=Protein CHROMATIN REMODELING 24; Short=AtCHR24; AltName: Full=DNA excision repair protein CHR24	SNF2_N
Solyc02g071950.1	13.0622	7.10973	32.3008	586.875	285.773	484.53	17.4909	452.393	-4.69039	9.80867e-17	2.77459e-15	-	2	41867289	41867591	+	303	protein_coding	- && -	-
Solyc07g006900.2	0	0	0	173.609	958.907	286.313	0	472.943	-11.2754	1.01466e-16	2.86669e-15	-	7	1754891	1758020	+	2208	protein_coding	Auxin efflux carrier component [Source:UniProtKB/TrEMBL;Acc:E5KGD3] && Q9LU77.2 RecName: Full=Auxin efflux carrier component 2; Short=AtPIN2; AltName: Full=Auxin efflux carrier AGR; AltName: Full=Ethylene-insensitive root 1; Short=AtEIR1; AltName: Full=Polar-auxin-transport efflux component AGR1; AltName: Full=Protein AGRAVITROPIC 1; Short=AtAGR1; AltName: Full=Protein WAVY 6	-
Solyc03g096780.1	539.902	509.869	494.607	41.5153	55.066	86.1813	514.793	60.9208	3.07934	1.05422e-16	2.97485e-15	-	3	60555428	60555769	-	342	protein_coding	- && Q9FIR9.1 RecName: Full=Protein RESPONSE TO LOW SULFUR 2; AltName: Full=Protein ENHANCED DE-ETIOLATION 6	-
Solyc09g072800.3	20.6817	48.7524	23.2162	696.324	870.612	284.398	30.8835	617.111	-4.319	1.09737e-16	3.09286e-15	-	9	65923492	65926854	+	1691	protein_coding	- && F4IDQ5.1 RecName: Full=Protein JASON	-
Solyc12g009220.2	758.694	614.484	876.16	116.998	50.3189	52.6664	749.779	73.3276	3.35373	1.16198e-16	3.27098e-15	-	12	2502493	2504654	+	858	protein_coding	Jasmonate ZIM-domain protein 1 [Source:UniProtKB/TrEMBL;Acc:A7XXZ0] && Q9LMA8.1 RecName: Full=Protein TIFY 10A; AltName: Full=Jasmonate ZIM domain-containing protein 1	Zim
Solyc02g085315.1	1596.85	1867.83	1952.18	467.99	295.268	441.44	1805.62	401.566	2.16883	1.20393e-16	3.38498e-15	-	2	48881492	48884432	-	861	protein_coding	- && -	-
Solyc08g078910.2	70710.9	75822.2	73231.1	5624.37	13812.1	4050.52	73254.7	7828.99	3.22602	1.20986e-16	3.39755e-15	-	8	62696544	62700466	-	666	protein_coding	- && P14009.1 RecName: Full=14 kDa proline-rich protein DC2.15; Flags: Precursor	-
Solyc09g014870.1	0	0	0	429.306	261.089	216.411	0	302.268	-10.6296	1.27488e-16	3.57582e-15	-	9	7079384	7079809	+	426	protein_coding	- && Q8GWP3.1 RecName: Full=Copper transporter 6; Short=AtCOPT6	-
Solyc04g007380.2	222.057	292.515	222.068	5.66117	0	0	245.547	1.88706	7.01717	1.28007e-16	3.58467e-15	-	4	1074259	1078159	+	1254	protein_coding	- && Q3ECH2.2 RecName: Full=LEAF RUST 10 DISEASE-RESISTANCE LOCUS RECEPTOR-LIKE PROTEIN KINASE-like 2.8; AltName: Full=Probable receptor-like serine/threonine-protein kinase LRK10L-2.8; Flags: Precursor	Pkinase
Solyc10g081790.1	38.098	49.7681	15.141	695.381	383.563	523.791	34.3357	534.245	-3.96063	1.28112e-16	3.58467e-15	-	10	62910055	62910627	+	573	protein_coding	- && Q8RX29.1 RecName: Full=RING-H2 finger protein ATL70; AltName: Full=RING-type E3 ubiquitin transferase ATL70	-
Solyc08g075520.3	1285.53	1396.55	1251.66	5728.16	6390.5	3836.98	1311.25	5318.55	-2.02009	1.33432e-16	3.72904e-15	-	8	59792064	59797528	-	3773	protein_coding	- && -	-
Solyc06g007980.3	2105.18	2094.32	1850.23	5586.63	6223.4	5252.27	2016.58	5687.44	-1.49591	1.34675e-16	3.75927e-15	-	6	1833318	1843658	+	2662	protein_coding	- && Q9M8Z7.1 RecName: Full=Sterol 3-beta-glucosyltransferase UGT80A2; AltName: Full=UDP-glucose:sterol glucosyltransferase 80A2	-
Solyc01g104680.3	1742.71	2194.88	1891.62	299.099	445.275	204.92	1943.07	316.431	2.61834	1.35515e-16	3.77818e-15	-	1	92993371	92993924	-	183	protein_coding	- && -	-
Solyc01g080900.3	29.3899	9.14108	16.1504	272.68	840.231	373.452	18.2271	495.454	-4.76905	1.39845e-16	3.89423e-15	-	1	80095310	80099654	+	1850	protein_coding	- && Q9C5Y2.2 RecName: Full=Ent-kaurenoic acid oxidase 2; Short=AtKAO2; AltName: Full=Cytochrome P450 88A4	p450
Solyc06g050860.3	34.8324	13.2038	23.2162	447.233	675.982	257.586	23.7508	460.267	-4.27966	1.43472e-16	3.99043e-15	-	6	33790574	33794215	-	1131	protein_coding	- && Q9LYL9.1 RecName: Full=BTB/POZ domain-containing protein At3g56230	BTB
Solyc04g016190.1	290.633	142.195	175.636	7.54823	5.69648	5.74542	202.821	6.33004	5.00102	1.45508e-16	4.04223e-15	-	4	6942779	6944182	-	1404	protein_coding	Glycosyltransferase [Source:UniProtKB/TrEMBL;Acc:K4BQB9] && P56725.1 RecName: Full=Zeatin O-xylosyltransferase; AltName: Full=Zeatin O-beta-D-xylosyltransferase	UDPGT
Solyc07g063490.3	26.1243	33.5173	32.3008	348.162	1022.52	348.556	30.6475	573.079	-4.22405	1.47223e-16	4.085e-15	-	7	66095782	66098304	-	2322	protein_coding	- && -	-
Solyc04g055150.1	0	0	0	194.367	262.987	606.142	0	354.499	-10.8595	1.55856e-16	4.3194e-15	-	4	53712941	53713348	+	408	protein_coding	- && -	-
Solyc07g017610.3	1173.42	934.422	989.213	7268.95	3528.02	7950.7	1032.35	6249.22	-2.59781	1.6127e-16	4.46412e-15	-	7	7658117	7671210	+	3975	protein_coding	- && Q9SMZ4.1 RecName: Full=Alpha-aminoadipic semialdehyde synthase; AltName: Full=cAt-LKR/SDH; Short=LKR/SDH; Includes: RecName: Full=Lysine ketoglutarate reductase; Short=LKR; Includes: RecName: Full=Saccharopine dehydrogenase; AltName: Full=cAt-SDH; Short=SDH	Saccharop_dh
Solyc09g011130.2	0	0	0	602.915	325.649	162.787	0	363.784	-10.8969	1.63783e-16	4.52829e-15	-	9	4495198	4503021	+	1608	protein_coding	- && P50162.1 RecName: Full=Tropinone reductase 1; AltName: Full=Tropine dehydrogenase; AltName: Full=Tropinone reductase I; Short=TR-I	adh_short
Solyc12g049420.2	288.456	276.264	296.764	942.585	1178.22	1128.98	287.161	1083.26	-1.91544	1.64306e-16	4.53733e-15	-	12	61932281	61938248	-	1177	protein_coding	- && Q94AU2.1 RecName: Full=25.3 kDa vesicle transport protein; Short=AtSEC22	-
Solyc07g064650.2	1806.93	1477.81	1618.07	274.567	395.905	432.822	1634.27	367.765	2.15182	1.7157e-16	4.73232e-15	-	7	66839607	66840206	+	480	protein_coding	- && -	-
Solyc03g118810.1	1899.46	1998.85	2154.06	479.313	529.773	308.338	2017.46	439.141	2.19974	1.73925e-16	4.7916e-15	-	3	69107491	69107985	+	495	protein_coding	- && Q9M7R0.1 RecName: Full=Calcium-binding allergen Ole e 8; AltName: Full=PCA18/PCA23; AltName: Allergen=Ole e 8	-
Solyc07g053420.3	540.991	575.888	437.071	84.9176	58.8636	43.0907	517.983	62.2906	3.05544	1.7522e-16	4.81896e-15	-	7	61991584	61992291	+	657	protein_coding	- && Q9SLC3.1 RecName: Full=E3 ubiquitin-protein ligase ATL41; AltName: Full=RING-H2 finger protein ATL41; AltName: Full=RING-type E3 ubiquitin transferase ATL41	-
Solyc02g078100.3	19.5932	43.6741	95.8931	660.47	2806.47	1156.74	53.0535	1541.23	-4.85871	1.75333e-16	4.81896e-15	-	2	43450226	43451944	-	1186	protein_coding	- && Q03211.1 RecName: Full=Pistil-specific extensin-like protein; Short=PELP; Flags: Precursor	-
Solyc07g007160.3	550.788	593.155	629.866	25.4753	73.1048	23.9393	591.27	40.8398	3.85572	1.81602e-16	4.98538e-15	-	7	1919158	1921418	-	1185	protein_coding	- && Q9C1X4.1 RecName: Full=Uncharacterized RING finger protein P32A8.03c	-
Solyc11g066970.2	4.35405	9.14108	34.3196	418.927	1027.27	471.124	15.9383	639.105	-5.32008	1.82247e-16	4.99717e-15	-	11	53044757	53049449	-	2835	protein_coding	- && -	-
Solyc11g013250.1	8.7081	8.12541	16.1504	246.261	295.268	174.278	10.9946	238.602	-4.43668	1.86692e-16	5.11106e-15	-	11	6158650	6159129	+	480	protein_coding	- && -	C2
Solyc02g093090.1	81.6385	96.4892	21.1974	1814.41	1045.3	807.232	66.4417	1222.31	-4.20217	1.8684e-16	5.11106e-15	-	2	54655993	54656919	-	927	protein_coding	- && Q9FH92.1 RecName: Full=Protein IRX15-LIKE	-
Solyc07g064690.1	1288.8	1662.66	1597.88	393.451	431.983	443.355	1516.45	422.93	1.84233	2.05214e-16	5.6071e-15	-	7	66858724	66859113	+	390	protein_coding	- && -	-
Solyc12g015690.2	63.1338	22.3449	31.2914	426.475	1488.68	629.124	38.9234	848.093	-4.44808	2.06341e-16	5.63128e-15	-	12	5671177	5672080	+	681	protein_coding	- && Q9FM65.1 RecName: Full=Fasciclin-like arabinogalactan protein 1; Flags: Precursor	-
Solyc12g007050.1	769.579	1133.49	899.377	179.27	154.754	98.6297	934.15	144.218	2.69532	2.15878e-16	5.88462e-15	-	12	1490127	1490701	-	198	protein_coding	- && -	-
Solyc06g051830.2	0	0	0	499.127	150.007	373.452	0	340.862	-10.803	2.20431e-16	6.00171e-15	-	6	35598641	35603295	-	3450	protein_coding	- && Q84YJ9.1 RecName: Full=Potassium transporter 26; AltName: Full=OsHAK26	-
Solyc04g080290.3	3510.45	3106.95	3567.22	930.319	1222.84	1030.35	3394.88	1061.17	1.6777	2.26033e-16	6.14703e-15	-	4	64613519	64618484	+	1306	protein_coding	- && P53844.1 RecName: Full=Phosphatidylinositol transfer protein PDR17; Short=PITP; AltName: Full=Phosphatidylserine transport B pathway protein 2; AltName: Full=Pleiotropic drug resistance protein 17; AltName: Full=SEC14 homolog 3	CRAL_TRIO_N
Solyc04g077030.3	576.912	432.678	378.526	3862.81	1884.59	5009.05	462.705	3585.48	-2.95421	2.29342e-16	6.22975e-15	-	4	62077868	62083972	-	3655	protein_coding	- && Q3MIF4.1 RecName: Full=Xylulose kinase; Short=Xylulokinase	-
Solyc01g080790.3	0	0	0	432.136	625.663	125.442	0	394.414	-11.0135	2.30953e-16	6.26619e-15	-	1	79920307	79921362	-	851	protein_coding	- && C0HJG8.1 RecName: Full=Basic secretory protease; AltName: Full=Boswellia basic secretory protease; Short=BBSP, partial [Boswellia serrata]	-
Solyc08g066050.3	2.17703	3.04703	0	198.141	535.469	155.126	1.74135	296.245	-7.41809	2.33345e-16	6.32369e-15	-	8	54566004	54569075	+	1465	protein_coding	- && Q9M077.1 RecName: Full=Serine/threonine-protein kinase Aurora-1; Short=AtAur1; AltName: Full=Aurora-like kinase 1	Pkinase
Solyc09g009020.3	35762	35615.7	35273.5	8804.07	13109.5	8892.95	35550.4	10268.8	1.79159	2.35742e-16	6.38123e-15	PGH1	9	2370014	2374990	+	1861	protein_coding	Enolase [Source:UniProtKB/Swiss-Prot;Acc:P26300] && P26300.1 RecName: Full=Enolase; AltName: Full=2-phospho-D-glycerate hydro-lyase; AltName: Full=2-phosphoglycerate dehydratase	-
Solyc04g053130.3	1547.87	1458.51	1571.64	164.174	116.778	306.422	1526	195.791	2.96251	2.40169e-16	6.4935e-15	-	4	51662144	51664415	-	1259	protein_coding	SEP2 [Source:Projected from Arabidopsis thaliana (AT2G21970) UniProtKB/TrEMBL;Acc:A0A178VQ84] && Q9SJ02.1 RecName: Full=Stress enhanced protein 2, chloroplastic; Flags: Precursor	-
Solyc10g086580.2	236.207	378.847	365.403	10.3788	0	9.5757	326.819	6.65151	5.61883	2.44902e-16	6.61378e-15	-	10	65486787	65489640	-	1756	protein_coding	- && O49074.1 RecName: Full=Ribulose bisphosphate carboxylase/oxygenase activase, chloroplastic; Short=RA; Short=RuBisCO activase; Flags: Precursor	AAA
Solyc05g014490.2	310.226	287.436	368.432	1831.39	1226.64	1323.36	322.031	1460.46	-2.18107	2.50825e-16	6.76587e-15	-	5	8352891	8354940	+	1452	protein_coding	- && Q9M8W9.2 RecName: Full=Pentatricopeptide repeat-containing protein At3g04130, mitochondrial; Flags: Precursor	-
Solyc09g091200.3	177.428	76.1757	128.194	916.166	2192.2	1116.53	127.266	1408.3	-3.46885	2.67541e-16	7.20843e-15	-	9	70994079	71000255	+	1791	protein_coding	- && Q9T0H8.1 RecName: Full=Dirigent protein 18; Short=AtDIR18; Flags: Precursor	TMS_TDE
Solyc03g116120.2	0	0	0	286.833	195.579	326.531	0	269.648	-10.4648	2.70135e-16	7.26989e-15	-	3	67112952	67115019	-	2003	protein_coding	- && Q9FUT0.1 RecName: Full=Glutathione S-transferase U9; Short=AtGSTU9; AltName: Full=GST class-tau member 9; AltName: Full=Glutathione S-transferase 14	-
Solyc11g006630.1	44.629	53.8308	76.7145	1065.24	425.337	584.118	58.3914	691.566	-3.56498	2.8082e-16	7.5487e-15	-	11	1237332	1240207	+	2577	protein_coding	- && Q6L3Z4.2 RecName: Full=Putative late blight resistance protein homolog R1B-12	NB-ARC
Solyc06g035980.3	0	0	0	197.198	585.788	231.732	0	338.239	-10.7918	2.89878e-16	7.78319e-15	-	6	25432940	25434311	+	1035	protein_coding	- && Q67ZM4.1 RecName: Full=Actin-depolymerizing factor 7; Short=ADF-7; Short=AtADF7	Cofilin_ADF
Solyc03g083840.3	0	0	0	231.165	631.36	194.387	0	352.304	-10.8506	2.91313e-16	7.81269e-15	-	3	55187046	55190108	+	1970	protein_coding	Pectinesterase [Source:UniProtKB/TrEMBL;Acc:K4BIF9] && Q9FHN5.1 RecName: Full=Probable pectinesterase/pectinesterase inhibitor 59; Includes: RecName: Full=Pectinesterase inhibitor 59; AltName: Full=Pectin methylesterase inhibitor 59; Includes: RecName: Full=Pectinesterase 59; Short=PE 59; AltName: Full=Pectin methylesterase 59; Short=AtPME59; Flags: Precursor	-
Solyc02g083670.3	821.827	746.522	732.825	5832.89	2878.62	3476.94	767.058	4062.82	-2.40513	2.94531e-16	7.8899e-15	-	2	47536485	47542759	-	4728	protein_coding	Histidine kinase 1 [Source:Projected from Arabidopsis thaliana (AT2G17820) UniProtKB/Swiss-Prot;Acc:Q9SXL4] && Q9SXL4.2 RecName: Full=Histidine kinase 1; AltName: Full=Arabidopsis histidine kinase 1; Short=AtHK1; AltName: Full=Protein AUTHENTIC HIS-KINASE 1	-
Solyc01g104775.1	19403.8	19762	19297.7	3520.31	1889.33	4683.48	19487.9	3364.37	2.53417	3.10214e-16	8.30045e-15	-	1	93031546	93034082	-	1380	protein_coding	- && P30173.1 RecName: Full=Actin-101	Actin
Solyc06g074360.3	583.443	516.979	617.754	60.3858	58.8636	107.248	572.725	75.4991	2.9236	3.12404e-16	8.34944e-15	-	6	46130399	46134814	+	2857	protein_coding	Zinc finger protein WIP5 [Source:Projected from Arabidopsis thaliana (AT1G51220) UniProtKB/Swiss-Prot;Acc:Q8W031] && Q9SGD1.1 RecName: Full=Zinc finger protein WIP3; AltName: Full=WIP-domain protein 3; Short=AtWIP3	-
Solyc03g114080.2	8.7081	18.2822	13.1222	402.887	253.493	187.684	13.3708	281.355	-4.39162	3.21139e-16	8.57305e-15	-	3	65610882	65617541	+	3101	protein_coding	- && Q9FL07.1 RecName: Full=RING-H2 finger protein ATL46; AltName: Full=RING-type E3 ubiquitin transferase ATL46	Pkinase_Tyr
Solyc09g008910.2	0	0	0	735.009	298.116	146.508	0	393.211	-11.0091	3.2886e-16	8.76911e-15	-	9	2294519	2305870	+	3156	protein_coding	Cytochrome P450, family 76, subfamily G, polypeptide 1 [Source:Projected from Arabidopsis thaliana (AT3G52970) UniProtKB/TrEMBL;Acc:F4J865] && P37122.1 RecName: Full=Cytochrome P450 76A2; AltName: Full=CYPLXXVIA2; AltName: Full=Cytochrome P-450EG7 [Solanum melongena]	p450
Solyc03g111550.3	192.667	228.527	174.626	4.71764	0	0.95757	198.607	1.89174	6.70965	3.38011e-16	9.00279e-15	-	3	63633507	63635833	-	1190	protein_coding	- && Q9STM6.1 RecName: Full=GDSL esterase/lipase At3g48460; AltName: Full=Extracellular lipase At3g48460; Flags: Precursor	Lipase_GDSL
Solyc06g072400.2	0	0	0	354.767	167.097	339.937	0	287.267	-10.5562	3.42985e-16	9.12481e-15	-	6	44805305	44805866	-	483	protein_coding	- && Q9SIS4.1 RecName: Full=Type IV inositol polyphosphate 5-phosphatase 9; Short=At5PTase9	-
Solyc01g067010.3	645.488	716.051	783.295	152.852	87.346	119.696	714.945	119.965	2.57521	3.56125e-16	9.46357e-15	-	1	75164881	75166353	+	1473	protein_coding	- && Q8GXC7.1 RecName: Full=F-box/kelch-repeat protein At3g06240	F-box
Solyc04g074000.3	366.829	286.421	259.416	26.4188	27.533	12.4484	304.222	22.1334	3.78006	3.88052e-16	1.03002e-14	-	4	60110187	60130032	-	9211	protein_coding	- && Q8VZG8.3 RecName: Full=MDIS1-interacting receptor like kinase 2; Short=AtMIK2; AltName: Full=Probable LRR receptor-like serine/threonine-protein kinase At4g08850; Flags: Precursor	Pkinase_Tyr
Solyc03g005650.1	9.79662	18.2822	59.5547	1836.11	469.01	826.383	29.2112	1043.83	-5.1563	3.93051e-16	1.0421e-14	-	3	465280	467978	-	2613	protein_coding	- && Q8W3K0.1 RecName: Full=Probable disease resistance protein At1g58602	NB-ARC
Solyc08g080650.2	108092	110425	106567	15302.1	31527.2	16953.8	108361	21261	2.34956	4.01573e-16	1.06348e-14	-	8	64002840	64005894	+	1491	protein_coding	- && P12670.2 RecName: Full=Protein NP24; AltName: Full=Pathogenesis-related protein PR P23; AltName: Full=Salt-induced protein; Flags: Precursor	Thaumatin
Solyc10g005460.3	0	11.1724	13.1222	823.701	195.579	652.105	8.09822	557.128	-6.09467	4.06453e-16	1.07518e-14	-	10	335995	338011	-	1415	protein_coding	- && Q8GWP0.1 RecName: Full=Transcription factor MYB39; AltName: Full=Myb-related protein 39; Short=AtMYB39	Myb_DNA-binding
Solyc03g005537.1	0	0	0	402.887	240.202	192.472	0	278.52	-10.5116	4.41835e-16	1.16745e-14	-	3	412996	414582	+	1464	protein_coding	- && O48639.1 RecName: Full=Probable inorganic phosphate transporter 1-3; Short=AtPht1;3; AltName: Full=H(+)/Pi cotransporter	Sugar_tr
Solyc08g067690.2	0	0	0	482.143	207.922	210.665	0	300.243	-10.6199	4.51565e-16	1.1918e-14	-	8	56732268	56733865	+	1399	protein_coding	- && -	-
Solyc02g091470.3	70.7533	65.0032	80.7521	779.355	830.737	374.41	72.1696	661.5	-3.19619	4.53063e-16	1.1944e-14	-	2	53398654	53402149	+	2466	protein_coding	- && Q9CAL8.1 RecName: Full=Proline-rich receptor-like protein kinase PERK13; AltName: Full=Proline-rich extensin-like receptor kinase 13; Short=AtPERK13; AltName: Full=Protein ROOT HAIR SPECIFIC 10	Pkinase
Solyc01g080920.3	40.275	60.9405	23.2162	989.762	464.263	442.397	41.4773	632.141	-3.92992	4.74062e-16	1.24835e-14	-	1	80116795	80118413	+	1619	protein_coding	- && Q84TG3.1 RecName: Full=E3 ubiquitin-protein ligase PUB23; AltName: Full=Plant U-box protein 23; AltName: Full=U-box domain-containing protein 23	U-box
Solyc11g010380.2	3408.13	3166.88	3524.83	951.077	525.026	812.019	3366.61	762.707	2.14208	4.77904e-16	1.25704e-14	-	11	3451553	3457602	-	1856	protein_coding	Protein DETOXIFICATION [Source:UniProtKB/TrEMBL;Acc:K4D5J9] && Q9FKQ1.1 RecName: Full=Protein DETOXIFICATION 27; Short=AtDTX27; AltName: Full=Multidrug and toxic compound extrusion protein 27; Short=MATE protein 27	MatE
Solyc08g013758.1	1277.91	955.751	1374.8	235.882	300.964	203.962	1202.82	246.936	2.28415	4.9245e-16	1.29379e-14	-	8	3232100	3233483	+	1135	protein_coding	- && Q1PE04.1 RecName: Full=F-box/LRR-repeat protein 25	-
Solyc04g016000.3	4231.05	4712.74	4299.04	1309.62	757.632	1148.13	4414.28	1071.79	2.04215	4.92989e-16	1.29379e-14	-	4	6595218	6598734	-	1295	protein_coding	- && O22230.1 RecName: Full=Heat stress transcription factor B-3; Short=AtHsfB3; AltName: Full=AtHsf-05	HSF_DNA-bind
Solyc06g076350.3	895.846	774.961	773.201	4771.42	2556.77	4014.13	814.669	3780.78	-2.21448	4.98621e-16	1.30709e-14	-	6	47580296	47582950	+	1494	protein_coding	- && Q9LTH4.1 RecName: Full=Transcription factor BOA; AltName: Full=Protein BROTHER OF LUX ARRHYTHMO; AltName: Full=Protein PHYTOCLOCK 1-like; Short=Protein PCL1-like	Myb_DNA-binding
Solyc03g097750.3	321.111	415.411	612.707	49.0635	48.4201	55.5391	449.743	51.0075	3.14064	5.23571e-16	1.37095e-14	-	3	61537026	61539840	+	898	protein_coding	- && -	-
Solyc10g084600.2	596.505	559.637	485.522	115.111	99.6884	113.951	547.221	109.583	2.31998	5.3026e-16	1.38691e-14	-	10	64182094	64184341	-	684	protein_coding	- && -	-
Solyc07g054810.1	843.598	850.121	860.01	33.967	78.8013	119.696	851.243	77.4882	3.45788	5.38775e-16	1.4076e-14	-	7	63119526	63119714	+	189	protein_coding	- && -	-
Solyc04g008290.3	1171.24	1162.95	1188.07	6340.51	3658.09	4431.63	1174.08	4810.08	-2.03453	5.70504e-16	1.48882e-14	-	4	1974229	1980223	+	2480	protein_coding	- && Q9SIS3.1 RecName: Full=65-kDa microtubule-associated protein 6; Short=AtMAP65-6	-
ENSRNA050030202	158.923	121.881	130.213	641.6	3882.15	2495.43	137.006	2339.73	-4.09425	5.77772e-16	1.50609e-14	SSU_rRNA_eukarya	5	34105087	34105688	+	602	rRNA	Eukaryotic small subunit ribosomal RNA && -	-
Solyc05g047580.3	0	0	0	615.181	201.276	197.259	0	337.905	-10.7904	5.80672e-16	1.51196e-14	-	5	59890988	59902911	-	3172	protein_coding	Terpene cyclase/mutase family member [Source:UniProtKB/TrEMBL;Acc:K4C0Z1] && P38605.2 RecName: Full=Cycloartenol synthase; Short=AtCYC; AltName: Full=2,3-epoxysqualene--cycloartenol cyclase	-
Solyc04g082880.3	5668.98	5204.32	4967.26	1045.43	1609.26	867.559	5280.19	1174.08	2.16903	5.89249e-16	1.53257e-14	-	4	66470983	66476704	-	2052	protein_coding	- && P21342.2 RecName: Full=Pyrophosphate--fructose 6-phosphate 1-phosphotransferase subunit alpha; Short=PFP; AltName: Full=6-phosphofructokinase, pyrophosphate dependent; AltName: Full=PPi-PFK; AltName: Full=Pyrophosphate-dependent 6-phosphofructose-1-kinase	PFK
Solyc07g043000.3	45527.1	47873.9	47419.7	2555.08	8796.31	3044.12	46940.2	4798.5	3.29017	5.90778e-16	1.53483e-14	-	7	56656282	56666761	-	1448	protein_coding	- && Q00451.1 RecName: Full=36.4 kDa proline-rich protein	-
Solyc02g070260.3	839.244	558.622	629.866	4968.62	3933.42	2463.83	675.911	3788.62	-2.48697	5.91867e-16	1.53595e-14	-	2	40587924	40615883	+	7634	protein_coding	Outer arm dynein light chain 1 protein [Source:Projected from Arabidopsis thaliana (AT2G34680) TAIR;Acc:AT2G34680] && F4IIU4.1 RecName: Full=187-kDa microtubule-associated protein AIR9; AltName: Full=Auxin-induced in root cultures protein 9	-
Solyc04g063350.3	634.603	491.587	403.761	67.9341	47.4707	79.4783	509.984	64.961	2.97272	6.00887e-16	1.55762e-14	-	4	55473351	55480565	+	1847	protein_coding	- && Q9LPL5.1 RecName: Full=2-oxoisovalerate dehydrogenase subunit alpha 1, mitochondrial; AltName: Full=Branched-chain alpha-keto acid dehydrogenase E1 component alpha chain; Short=BCKDE1A; Short=BCKDH E1-alpha; Flags: Precursor	-
Solyc03g120550.3	2429.56	2896.71	2879.82	970.891	931.374	851.28	2735.36	917.848	1.57544	6.99604e-16	1.81149e-14	-	3	70405544	70416317	+	3808	protein_coding	- && Q9M817.1 RecName: Full=Protein NRT1/ PTR FAMILY 1.2; Short=AtNPF1.2; AltName: Full=Nitrate transporter 1.11	-
Solyc08g079250.3	0	0	0	265.132	547.811	150.339	0	321.094	-10.7168	7.86987e-16	2.03549e-14	-	8	62980471	62981308	+	683	protein_coding	- && -	-
Solyc12g005000.1	105.586	86.3324	126.175	641.6	506.987	635.827	106.031	594.804	-2.48783	8.45118e-16	2.18341e-14	-	12	1065	1337	-	273	protein_coding	- && -	-
Solyc08g079630.3	1105.93	939.5	1066.94	2788.13	3009.64	2951.23	1037.46	2916.33	-1.49119	8.52513e-16	2.20007e-14	-	8	63230382	63234805	-	1278	protein_coding	- && Q8VYJ2.1 RecName: Full=AT-hook motif nuclear-localized protein 1	-
Solyc07g041830.3	557.319	655.111	726.769	3414.63	2041.24	3296.91	646.399	2917.59	-2.17413	8.80461e-16	2.26968e-14	-	7	54291243	54295633	+	1216	protein_coding	- && -	-
Solyc11g071470.1	734.746	817.619	798.436	100.014	165.198	79.4783	783.601	114.897	2.76973	8.92872e-16	2.29912e-14	-	11	55224732	55226063	+	1332	protein_coding	- && Q7XPK7.1 RecName: Full=Agmatine hydroxycinnamoyltransferase 1; Short=OsAHT1; AltName: Full=Agmatine hydroxycinnamoyl transferase	-
Solyc04g076520.2	3526.78	4185.6	3475.37	1325.66	1022.52	983.425	3729.25	1110.53	1.74762	8.95634e-16	2.30368e-14	-	4	61489629	61492511	-	2230	protein_coding	- && Q8RWD6.1 RecName: Full=F-box protein At5g39450	-
Solyc10g054780.2	1351.93	1460.54	1862.35	317.026	400.652	237.477	1558.27	318.385	2.29111	9.7773e-16	2.51206e-14	-	10	55892648	55896286	-	1302	protein_coding	Probable carboxylesterase 18 [Source:Projected from Arabidopsis thaliana (AT5G23530) UniProtKB/Swiss-Prot;Acc:Q9LT10] && Q9LT10.1 RecName: Full=Probable carboxylesterase 18; AltName: Full=AtCXE18	Abhydrolase_3
Solyc05g011980.3	6495.16	7698.82	7628.05	615.181	1569.38	1316.66	7274.01	1167.07	2.63988	9.86329e-16	2.53136e-14	-	5	5192172	5193155	-	984	protein_coding	- && -	-
Solyc05g046030.3	3.26554	0	0	275.51	704.465	158.957	1.08851	379.644	-8.49956	1.1083e-15	2.84124e-14	-	5	58979099	58980850	+	1447	protein_coding	- && O23044.1 RecName: Full=Peroxidase 3; Short=Atperox P3; AltName: Full=ATPRC; AltName: Full=RCI3A; AltName: Full=Rare cold-inducible protein; Flags: Precursor	-
Solyc03g114860.3	2887.83	2781.94	2735.48	382.129	537.368	175.235	2801.75	364.911	2.94064	1.12681e-15	2.88552e-14	-	3	66233972	66235616	-	1376	protein_coding	UDP-arabinopyranose mutase, Pollen wall morphogenesi [Source: Projected from Oryza sativa (Os07g0604800)] && Q8RU27.1 RecName: Full=Alpha-1,4-glucan-protein synthase [UDP-forming] 2; AltName: Full=Reversibly glycosylated polypeptide 2; Short=RGP2; AltName: Full=UDP-glucose:protein transglucosylase 2; Short=UPTG 2	-
Solyc01g102310.3	2880.21	2582.86	2135.89	8392.69	7046.55	7719.93	2532.99	7719.72	-1.60778	1.13082e-15	2.89262e-14	-	1	91005215	91008775	-	2747	protein_coding	- && -	-
Solyc09g075410.3	0	0	0	192.48	412.045	200.132	0	268.219	-10.4572	1.13491e-15	2.89739e-14	-	9	67547879	67550224	+	1343	protein_coding	- && -	-
Solyc02g062510.3	93.6121	119.85	93.8743	663.301	1641.54	703.814	102.445	1002.88	-3.29102	1.13518e-15	2.89739e-14	-	2	34747103	34749804	-	1605	protein_coding	Peroxidase [Source:UniProtKB/TrEMBL;Acc:K4B6D9] && Q9FJZ9.1 RecName: Full=Peroxidase 72; Short=Atperox P72; AltName: Full=ATP6a; AltName: Full=PRXR8; Flags: Precursor	-
Solyc04g072375.1	450.644	326.032	467.353	67.9341	53.1671	51.7088	414.676	57.6033	2.84752	1.15261e-15	2.93865e-14	-	4	59480590	59481093	-	504	protein_coding	- && Q940Q4.2 RecName: Full=RING-H2 finger protein ATL13; AltName: Full=RING-type E3 ubiquitin transferase ATL13	-
Solyc06g072403.1	0	0	0	493.466	112.031	386.858	0	330.785	-10.7597	1.19595e-15	3.04581e-14	-	6	44805961	44806732	-	435	protein_coding	- && Q9SIS4.1 RecName: Full=Type IV inositol polyphosphate 5-phosphatase 9; Short=At5PTase9	-
Solyc03g005200.3	33.7439	6.09405	37.3479	551.964	1994.72	458.676	25.7286	1001.79	-5.28417	1.22542e-15	3.11745e-14	-	3	118779	120032	-	688	protein_coding	- && -	-
Solyc04g007795.1	436.494	517.995	487.541	3826.95	1771.61	5254.19	480.676	3617.58	-2.91181	1.29152e-15	3.282e-14	-	4	1488469	1489680	+	288	protein_coding	- && P85524.1 RecName: Full=Kirola; AltName: Allergen=Act d 11	-
Solyc05g010400.3	656.373	979.111	905.433	2944.75	3238.45	4233.42	846.973	3472.21	-2.03526	1.34306e-15	3.40927e-14	-	5	4633809	4638399	-	2690	protein_coding	- && Q9LFS4.1 RecName: Full=Protein NSP-INTERACTING KINASE 1; Short=AtNIK1; AltName: Full=LRR receptor-like serine/threonine-protein kinase NIK1; Flags: Precursor	Pkinase
Solyc05g011970.3	78.3729	63.9876	45.4231	12040.4	2308.97	2423.61	62.5945	5590.98	-6.48124	1.36573e-15	3.46303e-14	-	5	5179991	5182523	+	1863	protein_coding	- && H2DH17.1 RecName: Full=Cytochrome P450 CYP749A22; AltName: Full=Cytochrome P450 CYP749A20 [Panax ginseng]	p450
Solyc08g083370.3	0	8.12541	11.1034	265.132	918.083	247.053	6.40961	476.756	-6.20579	1.41139e-15	3.5749e-14	-	8	65953443	65954779	+	717	protein_coding	- && Q43187.1 RecName: Full=Soluble inorganic pyrophosphatase PPA1; AltName: Full=Pyrophosphate phospho-hydrolase; Short=PPase	Pyrophosphatase
Solyc12g056410.2	2151.99	2217.22	2050.09	746.331	623.765	533.367	2139.77	634.487	1.75374	1.44094e-15	3.64578e-14	-	12	63292522	63295015	+	1380	protein_coding	- && Q9LEX0.1 RecName: Full=F-box protein PP2-A13; AltName: Full=Protein PHLOEM PROTEIN 2-LIKE A13; Short=AtPP2-A13; AltName: Full=SKP1-interacting partner 9	-
Solyc05g013460.3	457.175	470.258	405.779	16.9835	22.7859	54.5815	444.404	31.4503	3.82145	1.46189e-15	3.69477e-14	-	5	6653458	6663001	+	1976	protein_coding	Protein DETOXIFICATION [Source:UniProtKB/TrEMBL;Acc:K4BY67] && Q9LPV4.1 RecName: Full=Protein DETOXIFICATION 31; Short=AtDTX31; AltName: Full=Multidrug and toxic compound extrusion protein 31; Short=MATE protein 31; AltName: Full=Protein ROOT HAIR SPECIFIC 2	MatE
Solyc06g007180.3	14.1507	20.3135	0	15903.2	9124.81	7413.51	11.4881	10813.8	-9.87936	1.47508e-15	3.72406e-14	-	6	1236335	1241119	-	2413	protein_coding	- && O24661.3 RecName: Full=Asparagine synthetase [glutamine-hydrolyzing]; AltName: Full=Glutamine-dependent asparagine synthetase	-
Solyc04g005620.3	236.207	177.743	367.422	1503.04	2861.53	1586.69	260.458	1983.76	-2.92894	1.50908e-15	3.80576e-14	-	4	408262	409722	-	906	protein_coding	- && Q5NRN4.1 RecName: Full=Casparian strip membrane protein 2; Short=SdCASP2 [Solanum demissum]	-
Solyc06g060010.3	63.1338	23.3605	34.3196	1079.4	373.119	569.754	40.2713	674.09	-4.06766	1.54199e-15	3.88455e-14	-	6	38062878	38065612	+	1031	protein_coding	- && O64961.1 RecName: Full=Germacrene C synthase; AltName: Full=Sesquiterpene synthase 1	-
Solyc03g098240.3	271.04	357.518	337.14	37.7411	35.1283	46.9209	321.899	39.9301	3.01144	1.55365e-15	3.90968e-14	-	3	62031070	62035654	+	2247	protein_coding	Glutamate decarboxylase [Source:UniProtKB/TrEMBL;Acc:B1Q3F0] && P54767.1 RecName: Full=Glutamate decarboxylase; Short=GAD; AltName: Full=ERT D1	-
Solyc05g053620.3	2233.63	2588.96	2402.38	178.327	502.24	227.902	2408.32	302.823	2.9915	1.63858e-15	4.11894e-14	-	5	64541894	64543334	+	896	protein_coding	- && Q3E6P4.1 RecName: Full=F-box protein At2g02240	-
Solyc03g070380.3	66.3993	107.662	220.05	1252.06	1709.89	1135.68	131.37	1365.88	-3.37702	1.6464e-15	4.13413e-14	-	3	18333802	18338612	+	986	protein_coding	- && Q6RYA0.1 RecName: Full=Salicylic acid-binding protein 2; Short=NtSABP2; AltName: Full=Methyl salicylate esterase	-
Solyc01g102330.3	8728.79	8609.88	8176.15	821.814	2129.53	1142.38	8504.94	1364.58	2.63985	1.65821e-15	4.15931e-14	-	1	91020799	91022041	-	816	protein_coding	- && Q8L9J9.2 RecName: Full=Probable carbohydrate esterase At4g34215	-
Solyc01g080170.3	760.871	810.509	864.048	3089.11	2277.64	3444.38	811.809	2937.05	-1.85507	1.73322e-15	4.34275e-14	-	1	79240128	79249261	+	1424	protein_coding	- && O81027.2 RecName: Full=Hydroxymethylglutaryl-CoA lyase, mitochondrial; Short=HL; Short=HMG-CoA lyase; AltName: Full=3-hydroxy-3-methylglutarate-CoA lyase	HMGL-like
Solyc08g082130.3	229.676	232.59	271.529	3.77411	10.4435	17.2363	244.598	10.4846	4.5456	1.8238e-15	4.5648e-14	-	8	65130648	65140595	+	4674	protein_coding	- && -	-
Solyc01g111880.3	5339.16	5162.68	5017.73	1813.46	1123.16	1301.34	5173.19	1412.65	1.87262	1.84234e-15	4.60625e-14	-	1	97955743	97963709	-	2355	protein_coding	- && F4JTP5.1 RecName: Full=Serine/threonine-protein kinase STY46; AltName: Full=Serine/threonine/tyrosine-protein kinase 46	Pkinase_Tyr
Solyc12g056600.3	554.053	404.239	331.084	22.6447	29.4318	4.78785	429.792	18.9548	4.50216	1.87644e-15	4.68648e-14	-	12	63522864	63524079	+	1118	protein_coding	- && Q94KL8.1 RecName: Full=Secoisolariciresinol dehydrogenase	adh_short
Solyc04g076340.3	91.4351	112.74	129.203	696.324	500.341	672.214	111.126	622.96	-2.48613	1.91051e-15	4.76642e-14	-	4	61341252	61345445	+	3003	protein_coding	- && -	-
Solyc07g053570.3	129.533	80.2384	68.6393	582.157	619.967	640.614	92.8036	614.246	-2.72831	1.91355e-15	4.7689e-14	-	7	62111340	62113441	-	1515	protein_coding	- && Q9ZWA6.1 RecName: Full=Zinc finger protein MAGPIE; AltName: Full=Protein indeterminate-domain 3	-
Solyc02g091350.3	337.439	409.317	529.936	2136.15	1518.11	2215.82	425.564	1956.69	-2.20063	1.98315e-15	4.93707e-14	-	2	53312559	53321588	+	3950	protein_coding	- && U3U992.1 RecName: Full=7-deoxyloganetic acid glucosyltransferase; AltName: Full=UDP-glucose glucosyltransferase 8; Short=CrUGT8; AltName: Full=UDP-glycosyltransferase 709C2	UDPGT
Solyc04g074740.3	262.332	469.242	223.078	2172.95	7379.79	2608.42	318.217	4053.72	-3.67106	1.98637e-15	4.9398e-14	-	4	60750422	60758339	-	1297	protein_coding	- && Q41001.1 RecName: Full=Blue copper protein; Flags: Precursor	Cu_bind_like
Solyc10g085850.1	4212.55	4611.17	4777.5	530.263	610.473	1193.13	4533.74	777.956	2.543	1.9971e-15	4.96117e-14	-	10	65027135	65027311	+	177	protein_coding	TPSI1 protein [Source:UniProtKB/TrEMBL;Acc:Q41336] && -	-
novel.550	387.511	415.411	251.341	0.943529	0	0	351.421	0.31451	10.0116	2.00091e-15	4.96534e-14	-	4	4907839	4909775	-	1937	-	- && Q9LNG5.1 RecName: Full=Serine/threonine-protein phosphatase 7 long form homolog && -	-
Solyc01g005390.3	2869.32	2607.24	3140.25	962.399	676.932	638.699	2872.27	759.343	1.91933	2.0176e-15	5.00142e-14	-	1	276028	278025	+	875	protein_coding	- && Q9ZU95.1 RecName: Full=Nudix hydrolase 17, mitochondrial; Short=AtNUDT17; Flags: Precursor	NUDIX
Solyc01g080680.3	79.4615	37.58	143.335	1076.57	1299.75	791.91	86.7921	1056.07	-3.60464	2.1333e-15	5.28258e-14	-	1	79780938	79784992	+	2161	protein_coding	- && Q8LBI9.2 RecName: Full=Sugar transporter ERD6-like 16	Sugar_tr
Solyc07g043570.3	190.49	161.492	168.57	926.545	646.55	822.553	173.517	798.549	-2.20266	2.17866e-15	5.38918e-14	-	7	57611813	57618426	+	1461	protein_coding	- && Q94A68.1 RecName: Full=Uncharacterized oxidoreductase At1g06690, chloroplastic; Flags: Precursor	Aldo_ket_red
Solyc07g064820.1	422.343	529.167	616.744	68.8776	98.739	84.2662	522.751	83.9609	2.63859	2.20852e-15	5.45585e-14	-	7	66936441	66937913	-	1473	protein_coding	- && Q9FZ36.1 RecName: Full=Mitogen-activated protein kinase kinase kinase 2; AltName: Full=Arabidopsis NPK1-related protein kinase 2	Pkinase
Solyc08g044338.1	4416.1	4792.97	3216.96	939.755	1276.01	1065.78	4142.01	1093.85	1.92091	2.21031e-15	5.45585e-14	-	8	22258800	22276948	-	1178	protein_coding	- && -	-
Solyc00g135260.2	0	0	0	287.776	132.918	385.901	0	268.865	-10.4606	2.22011e-15	5.47423e-14	-	SL3.00SC0001239	587	3088	-	834	protein_coding	- && -	-
Solyc04g082180.3	0	0	0	292.494	282.925	146.508	0	240.642	-10.3007	2.55016e-15	6.28139e-14	-	4	66032611	66038038	+	2295	protein_coding	- && Q9FH04.1 RecName: Full=Alcohol dehydrogenase-like 7	ADH_N
Solyc01g091370.3	97.9662	83.2854	75.7051	496.296	877.258	501.767	85.6522	625.107	-2.86817	2.5532e-15	6.28222e-14	-	1	84878231	84882234	-	1668	protein_coding	AT-hook motif nuclear-localized protein 7 [Source:Projected from Arabidopsis thaliana (AT4G00200) UniProtKB/Swiss-Prot;Acc:Q4V3E0] && Q8VYJ2.1 RecName: Full=AT-hook motif nuclear-localized protein 1	-
Solyc12g042380.2	34052	33361.9	33683.7	8421.94	3591.63	7209.55	33699.2	6407.7	2.39483	2.57766e-15	6.33569e-14	-	12	58502750	58506205	+	2097	protein_coding	- && -	-
Solyc04g063390.2	0	0	0	224.56	486.1	144.593	0	285.084	-10.5452	2.60979e-15	6.40791e-14	-	4	55530877	55534066	-	1202	protein_coding	- && Q8GYX8.2 RecName: Full=Chaperone protein dnaJ 10; Short=AtDjC10; Short=AtJ10	DnaJ
Solyc10g080390.2	461.53	606.358	596.556	1992.73	1704.2	2019.52	554.815	1905.48	-1.77978	2.63488e-15	6.46269e-14	-	10	61786749	61793396	-	2636	protein_coding	- && Q9LT35.1 RecName: Full=Serine/threonine-protein kinase Nek6; AltName: Full=NimA-related protein kinase 6; Short=AtNek6	Pkinase
Solyc11g010290.2	189.401	185.869	157.467	1.88706	8.54472	4.78785	177.579	5.07321	5.13013	2.65072e-15	6.49468e-14	-	11	3366467	3373007	-	2584	protein_coding	- && Q8L7Z9.1 RecName: Full=Dicarboxylate transporter 2, chloroplastic; AltName: Full=Glutamate/malate translocator; Flags: Precursor	Na_sulph_symp
Solyc05g054230.3	206.817	197.041	173.617	1538.9	780.418	1039.92	192.492	1119.74	-2.54051	2.99131e-15	7.32147e-14	-	5	65036981	65044161	-	1214	protein_coding	- && Q94B74.1 RecName: Full=Nudix hydrolase 2; Short=AtNUDT2; AltName: Full=ADP-ribose pyrophosphatase; AltName: Full=NADH pyrophosphatase	-
Solyc01g079920.3	0	0	0	188.706	697.819	147.466	0	344.663	-10.819	3.01405e-15	7.36937e-14	-	1	78934870	78937979	-	1737	protein_coding	- && P13917.2 RecName: Full=Basic 7S globulin; AltName: Full=SBg7S; Short=Bg; Contains: RecName: Full=Basic 7S globulin high kDa subunit; Contains: RecName: Full=Basic 7S globulin low kDa subunit; Flags: Precursor	-
Solyc06g054540.3	456.087	434.709	368.432	2927.77	1720.34	5323.13	419.743	3323.75	-2.9853	3.16909e-15	7.74029e-14	-	6	37402952	37407658	-	1540	protein_coding	- && Q8VZK0.1 RecName: Full=E3 ubiquitin-protein ligase MIEL1; AltName: Full=MYB30-interacting E3 ligase 1	zf-CHY
Solyc02g082830.2	4524.95	4221.15	4518.08	759.541	1212.4	536.239	4421.39	836.06	2.4028	3.31113e-15	8.07874e-14	-	2	47034569	47035561	+	993	protein_coding	- && Q9SHP0.1 RecName: Full=Phosphoserine aminotransferase 2, chloroplastic; Short=AtPSAT2; Flags: Precursor	Aminotran_5
Solyc02g080560.1	1174.51	1363.04	1042.71	66.9905	200.326	72.7753	1193.42	113.364	3.39605	3.33466e-15	8.12763e-14	-	2	45309693	45309989	-	297	protein_coding	- && -	-
Solyc07g007550.3	113.205	91.4108	37.3479	973.722	925.678	613.802	80.6547	837.734	-3.37809	3.39735e-15	8.27175e-14	-	7	2221208	2227956	+	3650	protein_coding	Heparanase-like protein 3 [Source:Projected from Arabidopsis thaliana (AT5G34940) UniProtKB/Swiss-Prot;Acc:Q9FZP1] && Q9FZP1.2 RecName: Full=Heparanase-like protein 3; Flags: Precursor	-
Solyc12g014070.2	544.257	527.136	452.212	2122.94	1576.03	1687.24	507.868	1795.4	-1.82193	3.5092e-15	8.53515e-14	-	12	4887139	4893123	+	2273	protein_coding	- && Q9FMM4.1 RecName: Full=Probable E3 ubiquitin-protein ligase RHG1A; AltName: Full=RING-H2 finger G1a; AltName: Full=RING-H2 zinc finger protein RHG1a	-
Solyc05g005840.3	396.219	419.474	410.826	2853.23	1342.47	2435.1	408.84	2210.27	-2.43458	3.51356e-15	8.53681e-14	-	5	657707	661099	+	1323	protein_coding	- && Q94JU2.1 RecName: Full=WAT1-related protein At3g28050	-
Solyc01g104700.3	12158.7	12289.7	12049.2	2623.01	4299.89	3601.42	12165.9	3508.11	1.79408	3.55603e-15	8.62856e-14	-	1	93005303	93008329	-	555	protein_coding	- && P38547.1 RecName: Full=GTP-binding nuclear protein Ran2; AltName: Full=Ras-related nuclear protein 2	Ras
Solyc07g014580.3	0	0	0	601.028	75.0036	449.1	0	375.044	-10.9408	3.55874e-15	8.62856e-14	-	7	4893483	4896576	-	1647	protein_coding	- && Q5SMM6.1 RecName: Full=Hydroxycinnamoyltransferase 4; Short=OsHCT4; AltName: Full=BAHD-like hydroxycinnamoyl transferase HCT4; AltName: Full=Glycerol hydroxycinnamoyl transferase	-
Solyc01g109880.3	3212.2	3029.76	3382.5	135.868	479.454	443.355	3208.16	352.892	3.18451	3.65501e-15	8.85274e-14	-	1	96638668	96639159	+	492	protein_coding	BZIP transcription factor [Source:UniProtKB/TrEMBL;Acc:C0KYN1] && C0Z2L5.1 RecName: Full=bZIP transcription factor 44; Short=AtbZIP44	bZIP_1
Solyc01g080220.3	11791.9	10915.5	11454.7	3462.75	2045.04	3393.63	11387.3	2967.14	1.94028	3.7854e-15	9.15902e-14	-	1	79287547	79289964	+	1383	protein_coding	- && Q9ZT66.1 RecName: Full=Endo-1,3;1,4-beta-D-glucanase; Flags: Precursor	-
Solyc10g080570.2	37.0094	40.627	44.4137	469.877	308.559	287.271	40.6834	355.236	-3.12564	3.90204e-15	9.43142e-14	-	10	61933567	61936235	+	1760	protein_coding	E3 ubiquitin-protein ligase [Source:UniProtKB/TrEMBL;Acc:K4D2U7] && Q9M2P4.1 RecName: Full=E3 ubiquitin-protein ligase SINAT2; AltName: Full=Seven in absentia homolog 2	-
Solyc09g007940.3	53.3371	47.7368	36.3384	331.179	1176.32	527.621	45.8041	678.374	-3.88927	4.13896e-15	9.99367e-14	-	9	1439898	1444293	+	1459	protein_coding	- && Q9LZG0.1 RecName: Full=Adenosine kinase 2; Short=AK 2; AltName: Full=Adenosine 5'-phosphotransferase 2	PfkB
novel.621	255.801	238.684	329.065	0.943529	0	9.5757	274.516	3.50641	6.29502	4.2848e-15	1.03351e-13	-	5	66041568	66042305	+	627	-	- && - && -	-
Solyc03g119080.3	7539.04	7565.77	8653.6	2436.19	2827.35	1850.03	7919.47	2371.19	1.73979	4.69521e-15	1.13133e-13	-	3	69264228	69280854	-	8039	protein_coding	- && Q9LV35.1 RecName: Full=Actin-interacting protein 1-2	-
Solyc02g021680.3	83.8155	130.006	137.279	793.508	563.951	719.135	117.034	692.198	-2.56317	4.76265e-15	1.14639e-13	-	2	23983116	23986039	+	1503	protein_coding	- && Q9SA80.2 RecName: Full=Probable WRKY transcription factor 14; AltName: Full=AR411; AltName: Full=WRKY DNA-binding protein 14	WRKY
Solyc12g098320.2	194.844	252.903	145.354	1149.22	894.347	975.764	197.7	1006.44	-2.34791	4.81235e-15	1.15715e-13	-	12	66856709	66858577	-	499	protein_coding	CYTB5-D [Source:Projected from Arabidopsis thaliana (AT2G32720) UniProtKB/TrEMBL;Acc:A0A178VXM5] && P49098.1 RecName: Full=Cytochrome b5	-
Solyc03g119060.3	801.146	1052.24	1051.8	4597.82	3464.41	7477.67	968.394	5179.96	-2.41918	4.95541e-15	1.19032e-13	-	3	69256602	69262331	+	2524	protein_coding	Alpha-dioxygenase 2 enzyme [Source:UniProtKB/TrEMBL;Acc:Q5WM33] && Q9C9U3.1 RecName: Full=Alpha-dioxygenase 2; Short=Alpha DOX2; AltName: Full=Fatty acid dioxygenase AlphaDOX2; Flags: Precursor	An_peroxidase
Solyc03g043850.3	402.75	369.706	288.689	14.1529	39.8754	15.3211	353.715	23.1165	3.93545	4.96274e-15	1.19085e-13	-	3	7540157	7542563	+	877	protein_coding	- && Q9T070.1 RecName: Full=Cytochrome c oxidase subunit 6a, mitochondrial; Short=AtCOX6a; Flags: Precursor	-
Solyc10g009110.1	2829.05	2629.58	2592.14	670.849	469.96	827.341	2683.59	656.05	2.0323	4.98075e-15	1.19394e-13	-	10	3118987	3119655	+	669	protein_coding	- && O80340.1 RecName: Full=Ethylene-responsive transcription factor 4; Short=AtERF4; AltName: Full=Ethylene-responsive element-binding factor 4; Short=EREBP-4; AltName: Full=Protein RELATED TO APETALA2 5	AP2
Solyc01g107890.3	488.742	494.634	526.908	1395.48	1573.18	1670.96	503.428	1546.54	-1.6191	5.00196e-15	1.19779e-13	-	1	95174795	95179526	+	2928	protein_coding	- && Q9SLN1.2 RecName: Full=Filament-like plant protein 7; Short=AtFPP7	-
Solyc04g009290.2	183.959	291.499	260.426	1291.69	983.592	1114.61	245.294	1129.96	-2.20308	5.02744e-15	1.20265e-13	-	4	2734763	2738628	-	1614	protein_coding	- && Q9M667.2 RecName: Full=Disease resistance protein RPP13; AltName: Full=Resistance to Peronospora parasitica protein 13	NB-ARC
Solyc01g010970.3	503.982	402.208	520.851	64.16	90.1943	86.1813	475.68	80.1785	2.56878	5.04046e-15	1.20453e-13	-	1	6567740	6572078	+	3496	protein_coding	AGO7 [Source:UniProtKB/TrEMBL;Acc:K4ATU0] && Q9C793.1 RecName: Full=Protein argonaute 7; AltName: Full=Protein ZIPPY	Piwi
Solyc07g063120.3	308.049	466.195	383.573	47.1764	47.4707	62.2421	385.939	52.2964	2.88398	5.13892e-15	1.2268e-13	-	7	65818831	65828823	-	4586	protein_coding	- && Q9LJR3.1 RecName: Full=Protein SPA1-RELATED 3	Pkinase
Solyc10g044670.2	1749.24	1998.85	2484.14	12217.8	6362.02	10378.1	2077.41	9652.64	-2.21609	5.3723e-15	1.2812e-13	-	10	27326384	27332862	+	4058	protein_coding	phytochrome A [Source:Projected from Arabidopsis thaliana (AT1G09570) TAIR;Acc:AT1G09570] && P30733.2 RecName: Full=Phytochrome A	GAF
Solyc08g066510.3	0	0	0	122.659	519.329	228.859	0	290.282	-10.5712	5.41405e-15	1.28983e-13	-	8	55301590	55303644	+	1575	protein_coding	GATA transcription factor [Source:UniProtKB/TrEMBL;Acc:K4CLM7] && P69781.1 RecName: Full=GATA transcription factor 12	GATA
Solyc09g061280.3	938.298	743.475	1046.75	104.732	179.439	184.811	909.507	156.327	2.54064	5.58093e-15	1.32823e-13	-	9	58755546	58769035	-	1644	protein_coding	- && Q9FKB5.1 RecName: Full=Cyclin-dependent kinase inhibitor 3; AltName: Full=Inhibitor/interactor of CDK protein 6; AltName: Full=KIP-related protein 3	-
Solyc09g090105.1	857.748	762.772	859.001	146.247	219.314	138.848	826.507	168.136	2.29734	5.60012e-15	1.33143e-13	-	9	70124246	70124737	-	213	protein_coding	- && -	-
Solyc03g111797.1	421.255	508.854	311.905	1808.74	4541.99	2524.15	414.004	2958.3	-2.83708	5.67067e-15	1.34683e-13	-	3	63911726	63915461	-	3182	protein_coding	- && Q9SS87.1 RecName: Full=Protein SIEVE ELEMENT OCCLUSION B; Short=AtSEOb; AltName: Full=Protein SIEVE ELEMENT OCCLUSION-RELATED 1; Short=AtSEOR1	-
Solyc10g085010.2	1532.63	1441.24	1579.71	379.299	442.427	265.247	1517.86	362.324	2.06662	5.77006e-15	1.36903e-13	-	10	64475155	64476227	-	756	protein_coding	- && -	-
Solyc08g007460.2	7298.48	7496.7	7725.96	2402.22	1591.22	1231.44	7507.05	1741.63	2.10779	6.0329e-15	1.42994e-13	-	8	2031880	2034537	+	742	protein_coding	- && -	-
Solyc12g094410.2	347.236	253.919	307.867	3866.58	1333.93	1995.58	303.007	2398.69	-2.98499	6.29392e-15	1.49029e-13	-	12	65611929	65621489	+	3981	protein_coding	- && F4JTP5.1 RecName: Full=Serine/threonine-protein kinase STY46; AltName: Full=Serine/threonine/tyrosine-protein kinase 46	Pkinase_Tyr
Solyc10g080090.2	106.674	66.0189	110.025	619.898	868.713	512.3	94.2393	666.971	-2.82367	6.37954e-15	1.50902e-13	-	10	61606120	61611237	-	3058	protein_coding	- && Q9M2N5.1 RecName: Full=Zinc finger BED domain-containing protein DAYSLEEPER; AltName: Full=Transposase-like protein DAYSLEEPER	hATC
Solyc06g050170.3	1606.65	1227.95	1485.84	5603.62	3963.8	5744.46	1440.15	5103.96	-1.82547	6.42255e-15	1.51765e-13	-	6	32736710	32744703	+	2932	protein_coding	Potassium transporter [Source:Projected from Arabidopsis thaliana (AT2G40540) UniProtKB/TrEMBL;Acc:A0A178VTZ5] && O22881.2 RecName: Full=Potassium transporter 2; Short=AtKT2; Short=AtKUP2; Short=AtPOT2	K_trans
Solyc12g015920.2	0	0	0	236.826	411.096	124.484	0	257.469	-10.3982	6.50273e-15	1.53504e-13	-	12	5929192	5930535	+	571	protein_coding	- && -	-
Solyc01g099980.3	1191.92	963.876	734.844	4169.45	3339.09	3494.17	963.547	3667.57	-1.92861	6.53346e-15	1.5406e-13	-	1	89944226	89950506	-	3494	protein_coding	- && -	-
Solyc01g010350.3	0	0	0	689.72	84.4978	297.804	0	357.341	-10.8711	6.53952e-15	1.5406e-13	-	1	5093626	5097729	-	1210	protein_coding	- && P29463.1 RecName: Full=Triose phosphate/phosphate translocator, chloroplastic; Short=cTPT; AltName: Full=E29; Flags: Precursor	-
Solyc10g011960.2	1011.23	939.5	1280.93	72.6517	182.287	166.617	1077.22	140.519	2.93864	6.54933e-15	1.54064e-13	-	10	4245688	4249897	-	830	protein_coding	- && O03982.1 RecName: Full=Heavy metal-associated isoprenylated plant protein 39; Short=AtHIP39; Flags: Precursor	-
Solyc12g006490.2	940.475	754.647	662.167	164.174	153.805	194.387	785.763	170.789	2.20178	6.55295e-15	1.54064e-13	-	12	999956	1006056	-	1528	protein_coding	- && Q9LFQ0.1 RecName: Full=Beta-glucuronosyltransferase GlcAT14B; AltName: Full=GT14 family glucuronic acid transferase 2; Short=AtGlcAT14B	-
Solyc01g009400.3	0	0	0	98.127	453.82	314.083	0	288.677	-10.5632	6.7221e-15	1.57881e-13	-	1	3540574	3549443	+	1936	protein_coding	Peroxidase 60 [Source:Projected from Arabidopsis thaliana (AT5G22410) UniProtKB/Swiss-Prot;Acc:Q9FMR0] && Q9FMR0.1 RecName: Full=Peroxidase 60; Short=Atperox P60; AltName: Full=ATP14a; Flags: Precursor	-
Solyc09g098380.2	314.58	271.185	305.849	0.943529	0	0	297.205	0.31451	9.76991	6.83363e-15	1.60339e-13	-	9	72715237	72717588	+	1532	protein_coding	Amino acid transporter AVT1H [Source:Projected from Arabidopsis thaliana (AT5G16740) UniProtKB/Swiss-Prot;Acc:Q9LFE3] && -	Aa_trans
Solyc01g086650.3	1804.75	1680.94	1651.38	605.745	556.356	624.336	1712.36	595.479	1.52383	6.88659e-15	1.61418e-13	-	1	81498518	81503084	-	2131	protein_coding	AT5g40850/MHK7_8 [Source:Projected from Arabidopsis thaliana (AT5G40850) UniProtKB/TrEMBL;Acc:Q42606] && A6V4H6.1 RecName: Full=Siroheme synthase; Includes: RecName: Full=Uroporphyrinogen-III C-methyltransferase; Short=Urogen III methylase; AltName: Full=SUMT; AltName: Full=Uroporphyrinogen III methylase; Short=UROM; Includes: RecName: Full=Precorrin-2 dehydrogenase; Includes: RecName: Full=Siroh…	-
Solyc01g098560.3	621.541	676.44	592.519	57.5553	107.284	38.3028	630.167	67.7139	3.21807	7.05789e-15	1.65267e-13	-	1	88924660	88928553	+	1671	protein_coding	- && Q3ECP7.2 RecName: Full=Sugar transporter ERD6-like 5	Sugar_tr
Solyc11g072310.2	0	0	0	297.212	101.587	435.694	0	278.164	-10.5097	7.49118e-15	1.75236e-13	-	11	55803327	55805996	+	1411	protein_coding	Gibberellin 20-oxidase-3 [Source:UniProtKB/TrEMBL;Acc:Q9ZPP2] && Q39110.2 RecName: Full=Gibberellin 20 oxidase 1; AltName: Full=GA 20-oxidase 1; Short=AtGA20ox1; AltName: Full=Gibberellin C-20 oxidase 1	2OG-FeII_Oxy
Solyc07g006890.1	4524.95	4339.98	3952.82	1107.7	674.083	447.185	4272.58	742.99	2.52363	7.49974e-15	1.7526e-13	-	7	1747085	1748593	+	1509	protein_coding	- && O81117.2 RecName: Full=Cytochrome P450 94A1; AltName: Full=P450-dependent fatty acid omega-hydroxylase	p450
Solyc03g005980.3	2990.15	2808.34	2906.07	99.0705	207.922	464.422	2901.52	257.138	3.49632	7.82762e-15	1.82739e-13	-	3	659223	662855	-	1641	protein_coding	- && Q40746.1 RecName: Full=Aquaporin NIP1-1; AltName: Full=NOD26-like intrinsic protein 1-1; AltName: Full=OsNIP1;1	-
Solyc12g011200.2	173.074	252.903	271.529	17.927	21.8365	17.2363	232.502	18.9999	3.61342	7.90656e-15	1.84396e-13	-	12	4045129	4048554	-	2259	protein_coding	- && Q8VWJ2.1 RecName: Full=Probable WRKY transcription factor 28; AltName: Full=WRKY DNA-binding protein 28	-
Solyc02g083290.3	920.882	892.779	1231.47	10404.3	4775.55	4463.23	1015.04	6547.69	-2.68941	7.95272e-15	1.85287e-13	-	2	47287873	47299258	-	2960	protein_coding	- && Q8RWL6.1 RecName: Full=Serine/threonine-protein kinase STY17; AltName: Full=Serine/threonine/tyrosine-protein kinase 17	Pkinase_Tyr
Solyc04g016060.1	129.533	106.646	132.232	918.053	501.29	875.219	122.804	764.854	-2.63899	8.14481e-15	1.89573e-13	-	4	6735026	6735871	-	846	protein_coding	- && O22227.1 RecName: Full=Protein MIZU-KUSSEI 1	-
Solyc04g008040.3	78.3729	154.383	126.175	1059.58	1186.77	594.651	119.644	947	-2.98371	8.21573e-15	1.91032e-13	-	4	1700995	1706591	+	2355	protein_coding	- && Q9C9X0.1 RecName: Full=Microtubule-associated protein 70-1; Short=AtMAP70-1; AltName: Full=70 kDa microtubule-associated protein 1	-
Solyc12g009650.2	1443.37	1887.13	1532.27	149.078	261.089	66.0723	1620.92	158.746	3.35194	8.53758e-15	1.98317e-13	-	12	2922057	2923590	-	932	protein_coding	- && Q00451.1 RecName: Full=36.4 kDa proline-rich protein	-
novel.874	7.61959	6.09405	18.1692	258.527	206.023	206.835	10.6276	223.795	-4.39225	8.55096e-15	1.9843e-13	-	8	1817780	1821706	-	781	-	- && - && -	-
Solyc09g082060.3	10928.7	9539.23	8895.85	3337.26	3912.53	3074.76	9787.92	3441.52	1.50794	8.66307e-15	2.00831e-13	-	9	68325515	68330837	+	1571	protein_coding	Cysteine synthase [Source:UniProtKB/TrEMBL;Acc:K4CVI4] && O81154.1 RecName: Full=Cysteine synthase; AltName: Full=CSase A; Short=CS-A; AltName: Full=O-acetylserine (thiol)-lyase; Short=OAS-TL A; AltName: Full=O-acetylserine sulfhydrylase	PALP
Solyc03g033790.3	327.642	214.308	247.303	28.3059	26.5836	20.109	263.084	24.9995	3.39499	8.67531e-15	2.00915e-13	-	3	5429571	5441386	+	2471	protein_coding	- && Q8VZG2.1 RecName: Full=Protein HYPER-SENSITIVITY-RELATED 4; Short=AtHSR4; AltName: Full=BCS1-like protein	AAA
Solyc08g076520.3	322.2	429.631	406.789	1354.91	1336.77	1772.46	386.206	1488.05	-1.94563	9.09617e-15	2.10452e-13	-	8	60627437	60628638	+	919	protein_coding	- && -	-
Solyc09g009840.1	2067.09	2680.37	1833.07	651.035	630.41	538.154	2193.51	606.533	1.85457	9.1358e-15	2.11159e-13	-	9	3333021	3333887	-	867	protein_coding	- && -	-
Solyc04g080705.1	202.463	324.001	228.125	2059.72	1061.44	1399.01	251.53	1506.73	-2.58231	9.4025e-15	2.16751e-13	-	4	64878676	64880775	-	1105	protein_coding	- && Q9FWS6.1 RecName: Full=Bifunctional nuclease 1; Short=AtBBD1	-
Solyc01g109470.3	224.234	128.991	167.561	1338.87	738.644	1320.49	173.595	1132.67	-2.70658	9.40478e-15	2.16751e-13	-	1	96325970	96327478	-	1257	protein_coding	- && O65009.1 RecName: Full=BURP domain-containing protein BNM2A; AltName: Full=Brassica napus microspore-derived embryo protein 2; Short=BNM2; Flags: Precursor	-
Solyc05g009520.1	3190.43	3036.87	2795.03	1152.99	1175.37	1149.08	3007.44	1159.15	1.37544	9.40572e-15	2.16751e-13	-	5	3719864	3720391	-	528	protein_coding	- && -	-
Solyc04g055130.1	0	0	0	185.875	127.221	567.839	0	293.645	-10.5878	9.96309e-15	2.29368e-13	-	4	53706662	53707048	+	387	protein_coding	- && -	-
Solyc08g016620.3	0	0	0	243.43	261.089	133.102	0	212.54	-10.1215	1.08308e-14	2.49097e-13	-	8	8077080	8080611	-	1642	protein_coding	- && -	-
Solyc10g009380.3	214.437	216.339	189.767	3.77411	14.2412	10.5333	206.848	9.5162	4.44278	1.10144e-14	2.5307e-13	-	10	3435134	3437938	-	1521	protein_coding	- && -	-
Solyc06g072230.1	783.729	850.121	980.129	81.1435	175.641	150.339	871.326	135.708	2.68289	1.16401e-14	2.67183e-13	-	6	44650516	44651118	+	603	protein_coding	- && Q9LMU2.1 RecName: Full=Kunitz trypsin inhibitor 2; Short=AtKTI2; Flags: Precursor	-
Solyc01g079970.2	0	0	0	293.437	333.244	106.29	0	244.324	-10.3226	1.1841e-14	2.71525e-13	-	1	78968858	78970293	+	1436	protein_coding	- && P13917.2 RecName: Full=Basic 7S globulin; AltName: Full=SBg7S; Short=Bg; Contains: RecName: Full=Basic 7S globulin high kDa subunit; Contains: RecName: Full=Basic 7S globulin low kDa subunit; Flags: Precursor	-
Solyc10g083210.2	18.5047	17.2665	17.1598	229.277	250.645	170.447	17.6437	216.79	-3.61965	1.18701e-14	2.71924e-13	-	10	63200414	63205696	+	1686	protein_coding	- && Q9FNI3.1 RecName: Full=B3 domain-containing protein At5g06250	B3
Solyc07g056390.3	1700.26	1587.5	1527.22	568.004	436.73	430.907	1604.99	478.547	1.74575	1.19228e-14	2.72864e-13	-	7	64379473	64385002	-	2185	protein_coding	Like disulfide bond formation protein [Source:Projected from Arabidopsis thaliana (AT1G72280) UniProtKB/TrEMBL;Acc:Q0WSW0] && Q9C7S7.1 RecName: Full=Endoplasmic reticulum oxidoreductin-1; Flags: Precursor	-
Solyc07g055710.3	1062.39	817.619	1354.62	246.261	154.754	146.508	1078.21	182.508	2.5625	1.197e-14	2.73674e-13	-	7	63779403	63781040	-	1550	protein_coding	- && Q9FK72.1 RecName: Full=Heat stress transcription factor A-4c; Short=AtHsfA4c; AltName: Full=AtHsf-20; AltName: Full=Protein ROOT HANDEDNESS 1	HSF_DNA-bind
Solyc03g082620.3	2046.4	2133.93	2100.56	528.376	238.303	422.288	2093.63	396.322	2.40124	1.20263e-14	2.74691e-13	-	3	53964019	53969158	-	3330	protein_coding	- && Q6R3K9.1 RecName: Full=Metal-nicotianamine transporter YSL2; AltName: Full=Protein YELLOW STRIPE LIKE 2; Short=AtYSL2	OPT
Solyc07g047740.3	47.8946	38.5957	86.8085	1529.46	578.193	496.979	57.7663	868.211	-3.9091	1.24011e-14	2.82973e-13	-	7	59079268	59085839	+	3904	protein_coding	Peroxidase [Source:UniProtKB/TrEMBL;Acc:K4CEY0] && O23044.1 RecName: Full=Peroxidase 3; Short=Atperox P3; AltName: Full=ATPRC; AltName: Full=RCI3A; AltName: Full=Rare cold-inducible protein; Flags: Precursor	-
Solyc03g093070.2	0	0	0	128.32	568.699	175.235	0	290.751	-10.5735	1.25502e-14	2.86095e-13	-	3	55643883	55656570	+	867	protein_coding	- && P14009.1 RecName: Full=14 kDa proline-rich protein DC2.15; Flags: Precursor	-
Solyc05g053965.1	954.626	700.816	727.778	47.1764	42.7236	126.399	794.407	72.0998	3.4621	1.26158e-14	2.8731e-13	-	5	64824534	64838883	+	5768	protein_coding	- && Q8W1E0.1 RecName: Full=Late blight resistance protein R1-A; Short=Protein R1	-
Solyc01g095390.3	286.279	187.9	213.993	7.54823	4.74707	17.2363	229.391	9.84385	4.54348	1.27174e-14	2.8934e-13	-	1	86536968	86541235	+	3311	protein_coding	- && Q66GQ2.2 RecName: Full=Uncharacterized protein At5g41620	-
Solyc06g068530.1	234.03	232.59	128.194	12.2659	7.59531	5.74542	198.271	8.53553	4.53669	1.39137e-14	3.16247e-13	-	6	42589803	42590027	+	225	protein_coding	- && -	-
Solyc08g078460.3	632.426	1117.24	879.189	3620.32	3189.08	3565.99	876.286	3458.46	-1.98043	1.42287e-14	3.22788e-13	-	8	62382435	62385243	+	1454	protein_coding	- && Q8ZK57.1 RecName: Full=Inositol 2-dehydrogenase; AltName: Full=Myo-inositol 2-dehydrogenase; Short=MI 2-dehydrogenase >A9N564.1 RecName: Full=Inositol 2-dehydrogenase; AltName: Full=Myo-inositol 2-dehydrogenase; Short=MI 2-dehydrogenase >B5F3F4.1 RecName: Full=Inositol 2-dehydrogenase; AltName: Full=Myo-inositol 2-dehydrogenase; Short=MI 2-dehydrogenase	GFO_IDH_MocA
Solyc02g091810.2	0	0	0	187.762	242.1	156.084	0	195.316	-9.99959	1.42292e-14	3.22788e-13	-	2	53662938	53668261	+	2540	protein_coding	- && Q9T072.2 RecName: Full=Transcription factor bHLH25; AltName: Full=Basic helix-loop-helix protein 25; Short=AtbHLH25; Short=bHLH 25; AltName: Full=Transcription factor EN 29; AltName: Full=bHLH transcription factor bHLH025	HLH
Solyc01g006690.3	144.772	166.571	198.852	805.774	1008.28	668.384	170.065	827.478	-2.28214	1.43179e-14	3.24483e-13	-	1	1266897	1270429	-	2014	protein_coding	IRK-interacting protein [Source:Projected from Arabidopsis thaliana (AT5G12900) UniProtKB/Swiss-Prot;Acc:Q9LXU9] && Q9LXU9.1 RecName: Full=IRK-interacting protein	-
Solyc08g080560.2	15.2392	37.58	4.03761	629.334	333.244	617.633	18.9523	526.737	-4.79588	1.46099e-14	3.30777e-13	-	8	63948421	63949573	-	660	protein_coding	- && -	-
Solyc06g061200.1	5452.36	3967.23	3517.76	15130.4	26187.7	16593.7	4312.45	19303.9	-2.16236	1.46832e-14	3.32115e-13	-	6	39320095	39321006	-	912	protein_coding	- && -	-
Solyc05g050780.3	0	0	0	156.626	366.474	158.957	0	227.352	-10.2187	1.47585e-14	3.33494e-13	-	5	61798662	61806513	+	1595	protein_coding	- && Q8VZU3.1 RecName: Full=Serine carboxypeptidase-like 19; AltName: Full=Protein SINAPOYLGLUCOSE ACCUMULATOR 2; AltName: Full=Sinapoylglucose--choline O-sinapoyltransferase; Short=SCT; Contains: RecName: Full=Serine carboxypeptidase-like 19 chain A; Contains: RecName: Full=Serine carboxypeptidase-like 19 chain B; Flags: Precursor	Peptidase_S10
Solyc01g107220.2	0	0	0	384.96	256.342	104.375	0	248.559	-10.3474	1.5069e-14	3.40178e-13	-	1	94750826	94751992	-	1167	nontranslating_CDS	- && -	-
Solyc08g074250.2	32.6554	61.9562	17.1598	1060.53	319.003	739.244	37.2571	706.258	-4.24431	1.54533e-14	3.48516e-13	-	8	58480517	58483426	-	2789	protein_coding	- && Q60CZ8.1 RecName: Full=Putative late blight resistance protein homolog R1A-10 >Q6L438.2 RecName: Full=Putative late blight resistance protein homolog R1A-6	NB-ARC
Solyc05g014710.3	0	0	0	121.715	577.243	176.193	0	291.717	-10.5783	1.54771e-14	3.48714e-13	-	5	8843131	8846943	+	1777	protein_coding	- && -	-
Solyc12g088000.2	0	0	0	684.058	2128.58	390.689	0	1067.78	-12.4503	1.57852e-14	3.55313e-13	-	12	64474064	64480019	+	1615	protein_coding	- && Q9FN30.1 RecName: Full=Probable aminotransferase TAT2; AltName: Full=Tyrosine aminotransferase 2	Aminotran_1_2
Solyc08g006500.3	178.516	219.386	105.987	3316.5	864.915	1753.31	167.963	1978.24	-3.55814	1.64168e-14	3.69173e-13	-	8	1096629	1107065	+	3606	protein_coding	- && Q9C5V5.2 RecName: Full=Glutamate receptor 2.8; AltName: Full=Ligand-gated ion channel 2.8; Flags: Precursor	ANF_receptor
Solyc11g020610.2	364.652	264.076	468.362	2926.83	1401.33	3402.25	365.697	2576.8	-2.81683	1.65565e-14	3.71954e-13	-	11	11767680	11774116	+	2286	protein_coding	- && Q67XD9.1 RecName: Full=Alkaline/neutral invertase CINV2; AltName: Full=Alkaline/neutral invertase I; Short=A/N-INVI; AltName: Full=Cytosolic invertase 2	-
Solyc05g008830.3	9289.37	9823.61	9680.16	3793.93	2662.15	3382.14	9597.71	3279.41	1.54926	1.68039e-14	3.76924e-13	-	5	3057390	3060389	+	2299	protein_coding	- && -	-
Solyc01g102685.1	103.409	60.9405	12.1128	2115.39	733.896	1392.31	58.8207	1413.86	-4.58903	1.68102e-14	3.76924e-13	-	1	91299666	91301675	+	1294	protein_coding	- && Q9LT96.1 RecName: Full=Probable leucine-rich repeat receptor-like protein kinase At5g49770; Flags: Precursor	Pkinase_Tyr
Solyc02g071860.3	785.906	641.907	1002.34	4623.29	2607.09	4506.32	810.05	3912.23	-2.27188	1.73652e-14	3.88994e-13	-	2	41774159	41784057	-	3491	protein_coding	- && C0LGN2.1 RecName: Full=Probable leucine-rich repeat receptor-like serine/threonine-protein kinase At3g14840; Flags: Precursor	Pkinase_Tyr
Solyc06g054280.1	0	0	0	110.393	603.827	185.769	0	299.996	-10.6187	1.79666e-14	4.02079e-13	-	6	37210387	37211082	+	696	protein_coding	- && -	-
Solyc11g007400.1	384.245	457.054	394.676	16.9835	18.9883	52.6664	411.992	29.546	3.80236	1.81956e-14	4.06812e-13	-	11	1740601	1740990	-	390	protein_coding	- && D7SFH9.1 RecName: Full=Protein SUPPRESSOR OF NPR1-1 CONSTITUTIVE 4; Includes: RecName: Full=Glycerophosphodiester phosphodiesterase protein kinase domain-containing GDPDL2; AltName: Full=Glycerophosphodiester phosphodiesterase-like 2; Short=ATGDPDL2; Includes: RecName: Full=LEAF RUST 10 DISEASE-RESISTANCE LOCUS RECEPTOR-LIKE PROTEIN KINASE-like 2.6; AltName: Full=Probable receptor-like serin…	-
Solyc11g065470.2	0	0	0	241.543	315.205	112.993	0	223.247	-10.1924	1.8738e-14	4.18536e-13	-	11	51208307	51211939	+	2867	protein_coding	- && -	-
Solyc03g114100.1	2040.96	1935.88	1876.48	4768.59	5153.42	6134.19	1951.11	5352.07	-1.45583	1.90955e-14	4.26111e-13	-	3	65619375	65619752	+	378	protein_coding	- && -	-
Solyc07g056670.3	116.471	222.433	277.585	6.6047	0.949413	0.95757	205.496	2.83723	6.17522	1.9756e-14	4.40427e-13	-	7	64601986	64603605	-	1268	protein_coding	Gibberellin 2-oxidase 2 [Source:UniProtKB/TrEMBL;Acc:A0FK57] && Q9SQ80.1 RecName: Full=Gibberellin 2-beta-dioxygenase 1; AltName: Full=GA 2-oxidase 1; AltName: Full=Gibberellin 2-beta-hydroxylase 1; AltName: Full=Gibberellin 2-oxidase 1; AltName: Full=Protein SLENDER	2OG-FeII_Oxy
Solyc04g054890.3	537.725	595.186	465.334	5082.79	2364.04	2300.08	532.748	3248.97	-2.60848	2.00424e-14	4.46385e-13	-	4	53299351	53304081	-	2476	protein_coding	Acyl-coenzyme A oxidase [Source:UniProtKB/TrEMBL;Acc:K4BSN7] && O65201.2 RecName: Full=Acyl-coenzyme A oxidase 2, peroxisomal; Short=AOX 2; AltName: Full=Long-chain acyl-CoA oxidase; Short=AtCX2; Flags: Precursor	-
Solyc02g084590.3	75.1074	75.16	65.6111	405.717	433.882	757.438	71.9595	532.346	-2.88729	2.02313e-14	4.5016e-13	-	2	48315559	48318042	-	2356	protein_coding	- && Q9FH57.1 RecName: Full=GATA transcription factor 5	GATA
Solyc06g060680.2	2123.69	2218.24	2112.68	668.018	551.609	380.155	2151.53	533.261	2.01239	2.04214e-14	4.53956e-13	-	6	38823882	38829504	-	2568	protein_coding	- && Q8LGB6.1 RecName: Full=Non-functional pseudokinase ZED1; AltName: Full=Protein HOPZ-ETI-DEFICIENT 1	Pkinase
Solyc08g065410.2	0	0	0	170.779	163.299	225.987	0	186.688	-9.93437	2.11126e-14	4.68872e-13	-	8	53435507	53436309	-	699	protein_coding	- && O80992.1 RecName: Full=Abscisic acid receptor PYL2; AltName: Full=PYR1-like protein 2; AltName: Full=Regulatory components of ABA receptor 14	-
Solyc08g005280.2	2.17703	0	3.0282	288.72	222.163	101.502	1.73508	204.128	-6.8826	2.12595e-14	4.71685e-13	-	8	210644	215491	+	3749	protein_coding	- && Q9LFL0.1 RecName: Full=Cellulose synthase-like protein D2; Short=AtCslD2	-
Solyc12g007270.2	0	0	2.0188	265.132	437.68	202.047	0.672934	301.619	-8.77394	2.16301e-14	4.79449e-13	-	12	1676388	1687373	+	2268	protein_coding	- && Q9SVV2.1 RecName: Full=Probable xyloglucan endotransglucosylase/hydrolase protein 26; Short=At-XTH26; Short=XTH-26; Flags: Precursor	-
Solyc01g006300.3	6036.89	7169.65	5892.89	915.223	1786.8	789.995	6366.48	1164	2.45139	2.1777e-14	4.82246e-13	-	1	888483	891334	-	1245	protein_coding	Peroxidase [Source:UniProtKB/TrEMBL;Acc:K4ASJ6] && P11965.1 RecName: Full=Lignin-forming anionic peroxidase; AltName: Full=TOPA; Flags: Precursor	-
Solyc05g054380.2	896.935	927.312	833.766	75.4823	7.59531	19.1514	886.004	34.0763	4.69994	2.19262e-14	4.85087e-13	-	5	65152840	65155055	-	835	protein_coding	- && P17642.1 RecName: Full=Pathogenesis-related protein STH-2	-
Solyc04g014600.3	285.19	262.044	330.074	33.967	14.2412	28.7271	292.436	25.6451	3.51129	2.27124e-14	5.02004e-13	-	4	4873170	4875224	+	966	protein_coding	- && -	Usp
Solyc07g051850.3	8677.63	9009.04	8530.45	26901.9	20259.5	22549.8	8739.04	23237.1	-1.41088	2.27929e-14	5.03305e-13	-	7	60515224	60521664	+	2041	protein_coding	- && O65390.1 RecName: Full=Aspartic proteinase A1; Flags: Precursor	Asp
Solyc06g035760.3	195.932	213.292	185.73	6.6047	0	6.70299	198.318	4.4359	5.48273	2.35274e-14	5.19031e-13	-	6	24998266	25000682	+	2324	protein_coding	- && Q9FXW4.1 RecName: Full=Probable (S)-N-methylcoclaurine 3'-hydroxylase isozyme 2; AltName: Full=Cytochrome P450 80B2	p450
Solyc07g045440.1	658.55	686.597	791.371	5753.64	5640.46	2230.18	712.173	4541.43	-2.67281	2.36486e-14	5.2121e-13	-	7	58665087	58666316	-	1230	protein_coding	- && Q9SU13.1 RecName: Full=Fasciclin-like arabinogalactan protein 2; Flags: Precursor	-
Solyc08g079190.1	13.0622	7.10973	51.4795	677.454	1972.88	365.792	23.8838	1005.38	-5.39345	2.55253e-14	5.62039e-13	-	8	62940826	62941242	-	417	protein_coding	- && Q9SU34.1 RecName: Full=pEARLI1-like lipid transfer protein 2; Flags: Precursor	-
novel.689	0	0	0	106.619	535.469	187.684	0	276.591	-10.5015	2.61085e-14	5.74337e-13	-	6	39337894	39338722	+	503	-	- && - && -	-
Solyc06g009040.3	31584.3	31889.2	29749.1	8100.19	11292.3	6359.22	31074.2	8583.91	1.85601	2.75814e-14	6.06165e-13	-	6	2964329	2976278	+	1547	protein_coding	- && P46423.1 RecName: Full=Glutathione S-transferase; AltName: Full=25 kDa auxin-binding protein; AltName: Full=GST class-phi	GST_N
Solyc12g042840.2	0	0	0	337.783	206.023	114.908	0	219.571	-10.1685	2.78311e-14	6.11076e-13	-	12	59202523	59204319	+	857	protein_coding	- && -	-
Solyc01g005210.3	1375.88	1676.88	1383.89	10046.7	4680.61	6487.54	1478.88	7071.61	-2.25751	2.81903e-14	6.18379e-13	-	1	165332	169318	+	2713	protein_coding	Alpha,alpha-trehalose-phosphate synthase [UDP-forming] 6 [Source:Projected from Arabidopsis thaliana (AT1G68020) UniProtKB/Swiss-Prot;Acc:Q94AH8] && Q94AH8.2 RecName: Full=Alpha,alpha-trehalose-phosphate synthase [UDP-forming] 6; AltName: Full=Trehalose-6-phosphate synthase 6; Short=AtTPS6	-
Solyc05g014260.3	561.673	541.355	450.193	3091	1953.89	5651.58	517.74	3565.49	-2.78386	2.85642e-14	6.25988e-13	-	5	8044515	8050118	+	3350	protein_coding	Two-component response regulator [Source:Projected from Arabidopsis thaliana (AT1G67710) UniProtKB/TrEMBL;Acc:Q0WRT0] && Q9FXD6.1 RecName: Full=Two-component response regulator ARR11; AltName: Full=Receiver-like protein 3	Response_reg
Solyc08g068730.1	18690.9	17523.5	18701.2	4869.55	2650.76	5307.81	18305.2	4276.04	2.0979	2.87701e-14	6.29907e-13	-	8	57933378	57934073	-	696	protein_coding	N-hydroxycinnamoyl-CoA:tyramine N-hydroxycinnamoyl transferase THT1-3 [Source:UniProtKB/TrEMBL;Acc:Q8RXB8] && Q9SMB8.1 RecName: Full=Tyramine N-feruloyltransferase 4/11; AltName: Full=Hydroxycinnamoyl-CoA: tyramine N-hydroxycinnamoyltransferase	Acetyltransf_1
Solyc02g031990.1	450.644	587.061	573.34	34.9106	87.346	67.9875	537.015	63.4147	3.08237	2.90883e-14	6.36275e-13	-	2	27743970	27744518	+	549	protein_coding	- && Q9LIE6.1 RecName: Full=VQ motif-containing protein 22; Short=AtVQ22	-
Solyc01g095220.2	838.155	1094.9	1145.67	290.607	260.139	230.774	1026.24	260.507	1.97806	2.94414e-14	6.43394e-13	-	1	86436723	86439412	+	457	protein_coding	- && -	-
Solyc03g096430.1	43.5405	6.09405	31.2914	524.602	424.388	619.548	26.9753	522.846	-4.27981	3.07527e-14	6.71419e-13	-	3	59959994	59960191	+	198	protein_coding	- && -	-
Solyc05g009660.3	286.279	260.013	312.914	1355.85	897.196	1322.4	286.402	1191.82	-2.05703	3.13804e-14	6.84482e-13	-	5	3852020	3872878	-	4217	protein_coding	- && Q9SX27.1 RecName: Full=Transcription factor PERIANTHIA; AltName: Full=bZIP transcription factor 46; Short=AtbZIP46	-
Solyc03g043940.3	129.533	160.477	189.767	5.66117	9.49413	5.74542	159.926	6.96691	4.52091	3.15397e-14	6.87311e-13	-	3	7690258	7694288	-	980	protein_coding	- && Q84KK6.1 RecName: Full=Isoflavone 4'-O-methyltransferase; Short=GeHI4'OMT; AltName: Full=2,7,4'-trihydroxyisoflavanone 4'-O-methyltransferase; AltName: Full=S-adenosyl-L-methionine:2,7,4'-trihydroxyisoflavanone 4'-O-methyltransferase	-
Solyc01g010770.3	157.834	158.445	177.655	1066.19	622.815	1407.63	164.645	1032.21	-2.64818	3.38974e-14	7.37998e-13	-	1	5766511	5772212	-	3569	protein_coding	- && Q9FM19.1 RecName: Full=Hypersensitive-induced response protein 1; Short=AtHIR1	-
Solyc09g090510.3	81.6385	131.022	109.015	1353.02	629.461	642.53	107.225	875.004	-3.02801	3.43249e-14	7.46608e-13	-	9	70486938	70496461	+	3093	protein_coding	- && O53732.3 RecName: Full=Tuberculostearic acid methyltransferase UfaA1; Short=TSA methyltransferase	Amino_oxidase
Solyc12g099160.2	164.365	144.226	155.448	1048.26	1325.38	586.033	154.68	986.558	-2.67329	3.50983e-14	7.62715e-13	-	12	67391884	67396674	+	1826	protein_coding	Carboxypeptidase [Source:UniProtKB/TrEMBL;Acc:K4DHT7] && Q9LSM9.2 RecName: Full=Serine carboxypeptidase-like 33; Flags: Precursor	Peptidase_S10
Solyc01g106540.3	0	0	0	217.012	279.128	113.951	0	203.363	-10.0579	3.60834e-14	7.83389e-13	-	1	94272184	94277506	-	3946	protein_coding	- && -	-
Solyc07g061720.3	9.79662	23.3605	8.07521	155.682	754.784	373.452	13.7441	427.973	-4.95878	3.6218e-14	7.8558e-13	-	7	64811545	64813346	-	1622	protein_coding	Gibberellin 2-oxidase [Source:UniProtKB/TrEMBL;Acc:A4GVL8] && Q9SQ80.1 RecName: Full=Gibberellin 2-beta-dioxygenase 1; AltName: Full=GA 2-oxidase 1; AltName: Full=Gibberellin 2-beta-hydroxylase 1; AltName: Full=Gibberellin 2-oxidase 1; AltName: Full=Protein SLENDER	2OG-FeII_Oxy
Solyc08g005210.3	626.984	719.098	669.233	163.23	190.832	156.084	671.772	170.049	1.98207	3.66085e-14	7.93309e-13	-	8	137557	140663	+	678	protein_coding	- && Q9Z324.3 RecName: Full=Dolichol phosphate-mannose biosynthesis regulatory protein; AltName: Full=Dolichol-phosphate mannose synthase subunit 2; Short=DPM synthase subunit 2	-
Solyc02g024050.3	7259.29	6718.69	6781.16	2105.96	2754.25	2686.94	6919.72	2515.72	1.45974	3.74195e-14	8.10128e-13	-	2	25345784	25351499	+	1583	protein_coding	Ferredoxin--NADP reductase, chloroplastic [Source:UniProtKB/TrEMBL;Acc:K4B553] && O04397.1 RecName: Full=Ferredoxin--NADP reductase, root-type isozyme, chloroplastic; Short=FNR; Flags: Precursor	NAD_binding_1
Solyc02g087060.3	929.59	898.873	1051.8	3211.77	2492.21	3545.88	960.086	3083.29	-1.68319	3.75646e-14	8.12514e-13	-	2	50222991	50231064	+	2179	protein_coding	- && Q94JU2.1 RecName: Full=WAT1-related protein At3g28050	DUF6
Solyc07g062260.3	457.175	394.082	493.597	16.9835	59.813	35.4301	448.285	37.4089	3.58316	3.76735e-14	8.13932e-13	-	7	65168874	65172366	-	1557	protein_coding	BES1/BZR1 homolog protein 4 [Source:Projected from Arabidopsis thaliana (AT1G78700) UniProtKB/Swiss-Prot;Acc:Q9ZV88] && Q9ZV88.1 RecName: Full=BES1/BZR1 homolog protein 4	-
Solyc09g083380.3	2190.09	1973.46	2040	5998.96	7166.17	10789.9	2067.85	7985.01	-1.94918	3.77002e-14	8.13932e-13	-	9	69452199	69452974	-	644	protein_coding	- && P08283.1 RecName: Full=Histone H1; AltName: Full=PsH1b; AltName: Full=PsH1b-40	-
Solyc02g093975.1	1525.01	1205.61	1258.72	94.3529	266.785	107.248	1329.78	156.129	3.09034	3.78893e-14	8.17256e-13	-	2	55289849	55292427	+	1809	protein_coding	- && Q8LFN2.1 RecName: Full=Probable inactive leucine-rich repeat receptor-like protein kinase At3g03770; Flags: Precursor	Pkinase
Solyc12g008510.2	931.767	803.399	831.747	3345.75	2308.02	3721.12	855.638	3124.96	-1.86885	3.81844e-14	8.22858e-13	-	12	1919097	1924154	-	1889	protein_coding	Phosphotransferase [Source:UniProtKB/TrEMBL;Acc:K4DBT9] && Q42525.2 RecName: Full=Hexokinase-1; AltName: Full=Protein GLUCOSE INSENSITIVE 2	-
Solyc12g015860.2	9696.47	10004.4	10989.4	1103.93	2677.35	1067.69	10230.1	1616.32	2.66203	3.85481e-14	8.29633e-13	-	12	5832881	5837233	-	1397	protein_coding	Farnesyl pyrophosphate synthase [Source:UniProtKB/TrEMBL;Acc:O65004] && P49351.1 RecName: Full=Farnesyl pyrophosphate synthase 1; Short=FPP synthase 1; Short=FPS 1; AltName: Full=(2E,6E)-farnesyl diphosphate synthase 1; AltName: Full=Dimethylallyltranstransferase 1; AltName: Full=Farnesyl diphosphate synthase 1; AltName: Full=Geranyltranstransferase 1	-
Solyc05g009690.3	4239.76	4101.3	4099.18	1434.16	1593.12	1764.8	4146.75	1597.36	1.3763	3.85702e-14	8.29633e-13	-	5	3885638	3891802	+	1190	protein_coding	- && Q9SX28.1 RecName: Full=GDT1-like protein 5	-
Solyc04g009510.3	878.43	808.478	912.499	2460.72	2183.65	2671.62	866.469	2438.66	-1.49288	3.87602e-14	8.3295e-13	-	4	2930696	2942579	+	3168	protein_coding	- && Q8VYK4.1 RecName: Full=Nuclear transcription factor Y subunit B-8; Short=AtNF-YB-8	-
Solyc08g077300.3	1196.28	1400.62	1241.56	93.4093	55.066	217.368	1279.49	121.948	3.39144	3.94685e-14	8.46949e-13	-	8	61322192	61327462	-	1410	protein_coding	UMP-CMP kinase [Source:UniProtKB/TrEMBL;Acc:K4CN90] && O04905.1 RecName: Full=UMP-CMP kinase 3; AltName: Full=Deoxycytidylate kinase; Short=CK; Short=dCMP kinase; AltName: Full=Uridine monophosphate/cytidine monophosphate kinase; Short=UMP/CMP kinase; Short=UMP/CMPK	ADK
Solyc03g114180.3	4092.81	4565.46	4127.44	1326.6	1663.37	1644.15	4261.9	1544.71	1.46419	3.94845e-14	8.46949e-13	-	3	65668423	65674098	-	4359	protein_coding	Glycosyltransferase [Source:UniProtKB/TrEMBL;Acc:K4BKS0] && Q9ZVX4.1 RecName: Full=UDP-glycosyltransferase 90A1	UDPGT
Solyc12g019140.2	0	0	0	166.061	368.372	123.527	0	219.32	-10.1668	4.25301e-14	9.11438e-13	-	12	9292977	9296067	+	2269	protein_coding	- && P48979.1 RecName: Full=Polygalacturonase; Short=PG; AltName: Full=Pectinase; Flags: Precursor [Prunus persica]	-
Solyc02g079410.2	1088.51	894.81	1056.84	3176.86	2590	3138.91	1013.39	2968.59	-1.55067	4.47416e-14	9.57948e-13	-	2	44535396	44538337	+	1174	protein_coding	- && Q8VYN9.1 RecName: Full=Universal stress protein PHOS32; AltName: Full=Phosphorylated protein of 32 kDa; Short=AtPHOS32; Flags: Precursor	Usp
Solyc01g008650.3	43.5405	71.0973	43.4043	1687.97	225.96	1991.75	52.6807	1301.89	-4.62681	4.49824e-14	9.62218e-13	-	1	2646366	2648933	-	1882	protein_coding	- && A6YIH8.1 RecName: Full=Premnaspirodiene oxygenase; Short=HPO; AltName: Full=Cytochrome P450 71D55	p450
Solyc07g007670.3	424.52	245.794	209.955	1867.24	3297.31	1444.97	293.423	2203.18	-2.90905	4.54501e-14	9.71329e-13	-	7	2315103	2323906	+	1995	protein_coding	Purple acid phosphatase [Source:UniProtKB/TrEMBL;Acc:K4CBN7] && Q949Y3.1 RecName: Full=Bifunctional purple acid phosphatase 26; Includes: RecName: Full=Acid phosphatase; Includes: RecName: Full=Peroxidase; Flags: Precursor	Metallophos
Solyc05g008020.3	0	0	0	378.355	181.338	112.036	0	223.91	-10.1967	4.57913e-14	9.77721e-13	-	5	2439409	2443816	+	1965	protein_coding	Mitogen-activated protein kinase [Source:UniProtKB/TrEMBL;Acc:K4BWX6] && Q9LV37.2 RecName: Full=Mitogen-activated protein kinase 9; Short=AtMPK9; Short=MAP kinase 9	Pkinase
Solyc02g087970.1	965.511	1075.6	1200.18	205.689	82.599	68.945	1080.43	119.078	3.18142	4.68859e-14	1.00017e-12	-	2	50843161	50843433	+	273	protein_coding	Mini zinc finger protein [Source:UniProtKB/TrEMBL;Acc:A0ZXL1] && Q9LJW5.1 RecName: Full=Mini zinc finger protein 2; Short=AtMIF2	-
novel.450	0	0	0	399.113	131.019	148.423	0	226.185	-10.2113	4.70811e-14	1.00342e-12	-	3	63676542	63680220	+	310	-	- && Q9SJM0.5 RecName: Full=Callose synthase 10; AltName: Full=1,3-beta-glucan synthase; AltName: Full=Protein CHORUS; AltName: Full=Protein GLUCAN SYNTHASE-LIKE 8 && PF02364:1,3-beta-glucan synthase component	-
Solyc01g107250.3	1203.9	1299.05	1310.2	261.357	405.399	265.247	1271.05	310.668	2.0326	5.09115e-14	1.08406e-12	-	1	94757965	94760550	-	1088	protein_coding	- && Q9XIC7.1 RecName: Full=Somatic embryogenesis receptor kinase 2; Short=AtSERK2; AltName: Full=Somatic embryogenesis receptor-like kinase 2; Flags: Precursor	LRRNT_2
Solyc02g084860.1	56.6027	108.677	98.9213	885.973	1036.76	442.397	88.0671	788.377	-3.16113	5.34945e-14	1.13802e-12	-	2	48568822	48569256	-	435	protein_coding	- && Q9LZP8.1 RecName: Full=bZIP transcription factor 53; Short=AtbZIP53	bZIP_1
Solyc07g043700.2	0	0	0	137.755	394.956	137.89	0	223.534	-10.1943	5.367e-14	1.14071e-12	-	7	57794534	57795822	-	1289	protein_coding	- && K4D9Y4.1 RecName: Full=Acylsugar acyltransferase 3; Short=Sl-ASAT3	-
Solyc02g092580.3	34291.4	34866.1	35980.1	3373.12	8293.12	2541.39	35045.9	4735.88	2.88754	5.44701e-14	1.15666e-12	-	2	54264276	54266995	-	1601	protein_coding	Peroxidase [Source:UniProtKB/TrEMBL;Acc:K4BD54] && Q9SZE7.1 RecName: Full=Peroxidase 51; Short=Atperox P51; AltName: Full=ATP37; Flags: Precursor	-
Solyc03g031980.3	462.618	317.906	226.106	1861.58	1998.51	1414.33	335.543	1758.14	-2.39006	5.49636e-14	1.16607e-12	-	3	4493956	4497034	-	2201	protein_coding	- && Q9FG33.1 RecName: Full=Probable L-type lectin-domain containing receptor kinase S.5; Short=LecRK-S.5; Flags: Precursor	Pkinase_Tyr
Solyc03g117490.3	1031.91	865.356	910.48	3701.46	2506.45	3054.65	935.915	3087.52	-1.72211	5.82033e-14	1.23368e-12	-	3	68122060	68125071	+	2000	protein_coding	Glycerol kinase [Source:Projected from Arabidopsis thaliana (AT1G80460) UniProtKB/Swiss-Prot;Acc:Q9M8L4] && Q9M8L4.1 RecName: Full=Glycerol kinase; Short=Glycerokinase; AltName: Full=ATP:glycerol 3-phosphotransferase; AltName: Full=Protein GLYCEROL INSENSITIVE 1; AltName: Full=Protein NONHOST RESISTANCE TO P. S. PHASEOLICOLA 1	FGGY_N
Solyc06g074910.3	0	0	0	253.809	340.839	87.1389	0	227.262	-10.2182	5.8676e-14	1.24256e-12	-	6	46554453	46557947	+	2333	protein_coding	- && Q9FKL2.1 RecName: Full=Transcription factor MYB36; AltName: Full=Myb-related protein 36; Short=AtMYB36	Myb_DNA-binding
Solyc01g102410.3	7875.39	8229	7840.02	2844.74	3389.41	2484.89	7981.47	2906.35	1.45744	5.91945e-14	1.25224e-12	-	1	91103329	91111936	-	2505	protein_coding	- && O82462.1 RecName: Full=Glutamate--tRNA ligase, cytoplasmic; AltName: Full=GluRSAt; AltName: Full=Glutamyl-tRNA synthetase; Short=GluRS	-
Solyc10g086240.2	841.421	790.196	753.013	2236.16	2162.76	1994.62	794.877	2131.18	-1.42296	5.92407e-14	1.25224e-12	-	10	65247697	65249593	-	1579	protein_coding	Glycosyltransferase (Fragment) [Source:Projected from Arabidopsis thaliana (AT2G36970) UniProtKB/TrEMBL;Acc:W8Q6X6] && Q9SJL0.1 RecName: Full=UDP-glycosyltransferase 86A1	UDPGT
Solyc11g067340.1	0	0	0	224.56	508.886	78.5207	0	270.655	-10.4702	6.14646e-14	1.29807e-12	-	11	53364562	53365863	+	1302	protein_coding	- && K4D9Y4.1 RecName: Full=Acylsugar acyltransferase 3; Short=Sl-ASAT3	-
Solyc01g107080.3	2714.75	2759.59	2759.7	735.952	300.964	492.191	2744.68	509.702	2.42888	6.32689e-14	1.33496e-12	-	1	94619460	94622992	-	2159	protein_coding	- && Q9SND9.1 RecName: Full=Uncharacterized acetyltransferase At3g50280	-
Solyc06g068930.2	48.9831	100.552	71.6675	889.748	541.166	459.634	73.7342	630.182	-3.09417	6.52436e-14	1.37538e-12	-	6	42875169	42876719	+	1137	protein_coding	- && Q9LVI4.1 RecName: Full=Protein TIFY 6B; AltName: Full=Jasmonate ZIM domain-containing protein 3; AltName: Full=Protein JASMONATE INSENSITIVE 3	Zim
Solyc03g031860.3	22.8588	17.2665	6.05641	208.52	332.295	270.035	15.3939	270.283	-4.13888	6.56558e-14	1.38282e-12	PSY1	3	4350647	4356442	+	2554	protein_coding	Phytoene synthase 1 [Source:UniProtKB/TrEMBL;Acc:A1Z0Z4] && P08196.2 RecName: Full=Phytoene synthase 1, chloroplastic; AltName: Full=Fruit-ripening-specific protein pTOM5; Flags: Precursor	-
Solyc04g081235.1	1296.42	1248.27	1310.2	141.529	299.065	276.738	1284.96	239.111	2.42607	6.65363e-14	1.39998e-12	-	4	65311367	65318008	-	4451	protein_coding	Auxin response factor [Source:UniProtKB/TrEMBL;Acc:K4BVK3] && P93024.3 RecName: Full=Auxin response factor 5; AltName: Full=Auxin-responsive protein IAA24; AltName: Full=Transcription factor MONOPTEROS	-
Solyc06g065680.3	96.8777	56.8778	45.4231	702.929	1445.96	428.034	66.3929	858.973	-3.69493	6.65912e-14	1.39998e-12	-	6	41215889	41224636	+	2293	protein_coding	- && Q2QQ96.1 RecName: Full=Cyclin-A2-1; AltName: Full=G2/mitotic-specific cyclin-A2-1; Short=CycA2;1	Cyclin_C
Solyc10g080430.1	0	0	0	125.489	412.995	142.678	0	227.054	-10.2168	6.73057e-14	1.41372e-12	-	10	61832436	61834760	-	2325	protein_coding	- && Q9FL59.1 RecName: Full=FT-interacting protein 1	C2
Solyc03g119720.3	431.051	366.659	456.249	2815.49	1435.51	1795.44	417.986	2015.48	-2.26964	6.85755e-14	1.4391e-12	-	3	69746588	69753791	+	3212	protein_coding	- && P80035.2 RecName: Full=Gastric triacylglycerol lipase; Short=GL; Short=Gastric lipase; Flags: Precursor	-
novel.750	0	0	0	301.929	178.49	113.951	0	198.123	-10.0202	6.884e-14	1.44334e-12	-	7	6890034	6893126	+	1677	-	- && - && PF00403:Heavy-metal-associated domain	HMA
Solyc02g094255.1	588.886	599.249	640.97	71.7082	30.3812	12.4484	609.701	38.1793	3.99663	7.14755e-14	1.49725e-12	-	2	55481116	55482490	+	315	protein_coding	- && -	-
Solyc12g096110.2	0	0	0	140.586	327.548	135.017	0	201.05	-10.0413	7.41781e-14	1.55247e-12	-	12	66149681	66151519	+	855	protein_coding	- && O82281.2 RecName: Full=Protein Brevis radix-like 1; Short=AtBRXL1	-
Solyc01g066430.3	2655.97	3169.92	2945.43	957.682	992.137	678.917	2923.78	876.245	1.73842	7.43683e-14	1.55505e-12	-	1	74130134	74131036	-	903	protein_coding	- && Q8L9T5.2 RecName: Full=RING-H2 finger protein ATL2; AltName: Full=Protein ARABIDOPSIS TOXICOS EN LEVADURA 2; Short=Protein ATL2; AltName: Full=RING-type E3 ubiquitin transferase ATL2	-
Solyc02g093290.3	2590.66	2255.82	2253.99	924.658	816.495	878.092	2366.82	873.082	1.4387	7.61089e-14	1.59001e-12	-	2	54830590	54838877	+	2404	protein_coding	- && Q84WV8.1 RecName: Full=Nicotinate phosphoribosyltransferase 2	-
Solyc01g073800.2	124.09	71.0973	148.382	1320.94	1116.51	551.56	114.523	996.337	-3.12115	7.67899e-14	1.6028e-12	-	1	81041445	81042361	-	917	protein_coding	- && -	-
Solyc02g083870.3	0	0	0	75.4823	629.461	194.387	0	299.777	-10.6176	7.75203e-14	1.61659e-12	-	2	47687892	47688642	+	583	protein_coding	- && F4IQJ4.1 RecName: Full=Gibberellin-regulated protein 11; AltName: Full=GAST1 protein homolog 11; Flags: Precursor	-
Solyc02g068060.3	66.3993	107.662	44.4137	1051.09	891.499	415.585	72.8249	786.058	-3.43199	7.86079e-14	1.63781e-12	-	2	38674728	38680107	+	3669	protein_coding	- && Q8LFN2.1 RecName: Full=Probable inactive leucine-rich repeat receptor-like protein kinase At3g03770; Flags: Precursor	Pkinase_Tyr
Solyc04g055100.1	0	0	0	224.56	185.136	121.611	0	177.102	-9.85839	7.97242e-14	1.65958e-12	-	4	53612132	53613082	-	951	protein_coding	- && -	-
Solyc07g043640.3	0	0	0	127.376	450.971	131.187	0	236.512	-10.2757	8.01152e-14	1.66622e-12	-	7	57734778	57737048	+	2191	protein_coding	- && Q9SEY5.1 RecName: Full=Probable acyl-activating enzyme 2; AltName: Full=AMP-binding protein 2; Short=AtAMPBP2	AMP-binding
Solyc11g027840.2	32.6554	118.834	154.438	1131.29	979.794	1956.32	101.976	1355.8	-3.73149	8.57172e-14	1.78114e-12	-	11	19156244	19158872	+	1559	protein_coding	- && -	-
Solyc09g009700.3	360.298	386.972	439.09	1717.22	2626.08	1333.9	395.453	1892.4	-2.25851	8.60229e-14	1.7859e-12	-	9	3088426	3103498	+	1205	protein_coding	- && Q9LZS7.1 RecName: Full=GDSL esterase/lipase At5g03610; AltName: Full=Extracellular lipase At5g03610; Flags: Precursor	Lipase_GDSL
Solyc00g009110.3	71.8419	51.7995	31.2914	1086	580.092	347.598	51.6443	671.23	-3.7017	8.70149e-14	1.80488e-12	-	SL3.00SC0000019	81566	89206	+	1963	protein_coding	inositol-1,4,5-triphosphate-5-phosphatase 2 && Q8H0Z6.1 RecName: Full=Type IV inositol polyphosphate 5-phosphatase 3; Short=At5PTase3	Exo_endo_phos
Solyc01g080020.2	469.149	539.324	470.381	1537.95	1375.7	1421.03	492.951	1444.9	-1.55136	8.80247e-14	1.8242e-12	-	1	79001308	79002938	-	1631	protein_coding	- && -	-
Solyc04g080270.3	2432.83	2617.4	3255.32	22205	8429.84	15626.6	2768.51	15420.5	-2.47764	9.36646e-14	1.93935e-12	-	4	64590838	64603774	-	5244	protein_coding	- && -	-
Solyc03g007130.3	0	7.10973	0	251.922	458.567	143.636	2.36991	284.708	-6.89284	9.47389e-14	1.95985e-12	-	3	1720829	1725221	+	2781	protein_coding	- && Q9FHM4.1 RecName: Full=65-kDa microtubule-associated protein 3; Short=AtMAP65-3; AltName: Full=Protein PLEIADE	-
Solyc03g116290.2	0	0	0	177.383	132.918	189.599	0	166.633	-9.77043	9.50809e-14	1.96517e-12	-	3	67253086	67256019	+	1662	protein_coding	- && P10967.1 RecName: Full=1-aminocyclopropane-1-carboxylate oxidase homolog; AltName: Full=Protein E8	2OG-FeII_Oxy
Solyc06g043150.3	0	0	0	154.739	487.049	100.545	0	247.444	-10.3409	1.00376e-13	2.07278e-12	-	6	29769958	29772566	+	1932	protein_coding	Protein FIZZY-RELATED 3 [Source:Projected from Arabidopsis thaliana (AT5G13840) UniProtKB/Swiss-Prot;Acc:Q8LPL5] && Q8LPL5.1 RecName: Full=Protein FIZZY-RELATED 3; AltName: Full=Cell cycle switch protein CCS52B	-
Solyc10g074950.2	518.132	454.007	594.537	1553.99	2923.24	2680.24	522.226	2385.82	-2.19171	1.03422e-13	2.13377e-12	-	10	58731894	58734296	-	1258	protein_coding	- && -	-
Solyc06g063260.3	72.9304	42.6584	24.2256	814.265	434.831	428.991	46.6048	559.363	-3.58781	1.0925e-13	2.25202e-12	-	6	40070691	40083434	-	2202	protein_coding	- && Q9C512.1 RecName: Full=Mannosyl-oligosaccharide 1,2-alpha-mannosidase MNS1; Short=AtMANIb; AltName: Full=Alpha-mannosidase IB	-
Solyc02g067520.3	1182.13	1105.06	1424.27	346.275	394.007	387.816	1237.15	376.032	1.71816	1.14334e-13	2.35473e-12	-	2	38256677	38258414	-	1154	protein_coding	- && -	-
Solyc06g065010.3	1417.24	1214.75	1665.51	287.776	300.964	135.017	1432.5	241.253	2.56982	1.15439e-13	2.37538e-12	-	6	40654515	40656693	+	1097	protein_coding	- && Q9SYF0.1 RecName: Full=GDSL esterase/lipase 2; AltName: Full=Extracellular lipase 2; Flags: Precursor	Lipase_GDSL
novel.811	235.119	120.865	300.802	8.49176	6.64589	14.3636	218.929	9.83373	4.47727	1.18259e-13	2.43127e-12	-	7	27019513	27021935	-	1475	-	- && - && -	-
Solyc12g042570.2	1731.82	1576.33	1708.92	414.209	465.213	603.269	1672.36	494.23	1.75867	1.18909e-13	2.44246e-12	-	12	58857029	58871589	+	1246	protein_coding	- && Q9SZ53.1 RecName: Full=Probable protein phosphatase 2C 60; Short=AtPP2C60	PP2C
Solyc07g039310.1	0	0	0	105.675	287.672	177.15	0	190.166	-9.96101	1.21214e-13	2.48762e-12	-	7	47055302	47056843	+	1542	protein_coding	- && Q9SU79.1 RecName: Full=Probable polyamine oxidase 5; Short=AtPAO5	Amino_oxidase
Solyc10g080050.2	0	0	0	203.802	157.603	133.102	0	164.836	-9.75483	1.24303e-13	2.54876e-12	-	10	61583240	61583785	+	546	protein_coding	- && O22227.1 RecName: Full=Protein MIZU-KUSSEI 1	-
Solyc08g078880.3	844.686	763.788	684.374	82.087	175.641	91.9267	764.283	116.552	2.71308	1.28493e-13	2.63235e-12	-	8	62686603	62690295	-	3072	protein_coding	- && Q9SIT5.1 RecName: Full=Cation/H(+) antiporter 15; AltName: Full=Protein CATION/H+ EXCHANGER 15; Short=AtCHX15	Na_H_Exchanger
Solyc12g009110.2	732.569	693.706	797.427	1903.1	1977.63	2109.53	741.234	1996.75	-1.42961	1.30227e-13	2.66431e-12	-	12	2431675	2436192	-	2165	protein_coding	- && Q6WUC1.1 RecName: Full=(RS)-norcoclaurine 6-O-methyltransferase; Short=Ps6OMT	-
novel.1018	237.296	156.414	250.332	5609.28	786.114	3375.43	214.68	3256.94	-3.92333	1.30282e-13	2.66431e-12	-	SL3.00SC0003115	115	1919	+	680	-	- && Q9SSK9.1 RecName: Full=MLP-like protein 28 && PF00407:Pathogenesis-related protein Bet v 1 family	-
Solyc12g097095.1	7.61959	10.1568	41.3855	353.823	1032.01	371.537	19.7206	585.791	-4.88893	1.31174e-13	2.6802e-12	-	12	66708733	66714277	+	4856	protein_coding	Dirigent protein [Source:UniProtKB/TrEMBL;Acc:K4DHI2] && Q9T0H8.1 RecName: Full=Dirigent protein 18; Short=AtDIR18; Flags: Precursor	-
novel.162	0	0	0	195.31	468.061	78.5207	0	247.297	-10.34	1.32973e-13	2.71456e-12	-	10	62602400	62604446	+	472	-	- && - && -	-
Solyc02g081990.3	0	0	0	325.517	191.781	92.8843	0	203.394	-10.0581	1.36758e-13	2.78939e-12	-	2	46297275	46299076	+	1713	protein_coding	Pectinesterase [Source:UniProtKB/TrEMBL;Acc:K4BA69] && Q9FF78.1 RecName: Full=Probable pectinesterase/pectinesterase inhibitor 46; Includes: RecName: Full=Pectinesterase inhibitor 46; AltName: Full=Pectin methylesterase inhibitor 46; Includes: RecName: Full=Pectinesterase 46; Short=PE 46; AltName: Full=Pectin methylesterase 46; Short=AtPME46	-
Solyc08g079470.3	247.092	220.402	241.247	3859.03	846.877	2430.31	236.247	2378.74	-3.33188	1.37032e-13	2.79253e-12	-	8	63107444	63112938	-	1795	protein_coding	- && Q8L733.1 RecName: Full=Putative transferase At4g12130, mitochondrial; AltName: Full=Iron-sulfur cluster assembly factor homolog COG0354; Flags: Precursor	-
Solyc11g016970.2	1394.39	1249.28	1156.77	3086.28	3901.14	3761.34	1266.81	3582.92	-1.50003	1.38349e-13	2.8169e-12	-	11	7627701	7632851	+	3309	protein_coding	Protein DETOXIFICATION [Source:UniProtKB/TrEMBL;Acc:K4D6K1] && Q9LE20.1 RecName: Full=Protein DETOXIFICATION 54; Short=AtDTX54; AltName: Full=Multidrug and toxic compound extrusion protein 54; Short=MATE protein 54; AltName: Full=Protein NOVEL ION CARRIER 2; Short=Protein NIC2	MatE
Solyc01g079260.3	1101.58	981.143	1025.55	189.649	314.256	206.835	1036.09	236.913	2.12868	1.39865e-13	2.84527e-12	-	1	78215921	78218540	+	1409	protein_coding	- && Q8VWJ2.1 RecName: Full=Probable WRKY transcription factor 28; AltName: Full=WRKY DNA-binding protein 28	WRKY
Solyc03g096030.3	18.5047	89.3795	46.4325	1520.02	783.266	483.573	51.4389	928.955	-4.1729	1.40182e-13	2.84765e-12	-	3	59268604	59271049	-	1901	protein_coding	- && Q9LY46.1 RecName: Full=Protein ESKIMO 1; AltName: Full=Protein trichome birefringence-like 29	-
Solyc12g006790.2	40.275	53.8308	27.2538	286.833	926.627	444.313	40.4532	552.591	-3.77198	1.40227e-13	2.84765e-12	-	12	1199288	1214285	-	3977	protein_coding	- && Q69VD5.1 RecName: Full=Protein argonaute PNH1; AltName: Full=Protein PINHEAD homolog 1; Short=OsPNH1	Piwi
Solyc07g052135.1	151.303	124.928	178.664	0	0	0	151.632	0	9.76089	1.55287e-13	3.15073e-12	-	7	60798751	60801511	-	1228	protein_coding	- && B5A435.1 RecName: Full=Sesquiterpene synthase; Short=SaSesquiTPS1 [Santalum album]	-
Solyc02g084370.1	15.2392	10.1568	6.05641	146.247	594.333	211.623	10.4841	317.401	-4.92446	1.57502e-13	3.19289e-12	-	2	48037322	48040705	-	3384	protein_coding	- && C0LGS2.1 RecName: Full=Probable LRR receptor-like serine/threonine-protein kinase At4g36180; Flags: Precursor	Pkinase
Solyc04g009640.3	192.667	155.398	283.642	8.49176	0	3.83028	210.569	4.10735	5.67852	1.61791e-13	3.27698e-12	-	4	3013086	3016648	-	3446	protein_coding	- && Q2R2D5.1 RecName: Full=Receptor kinase-like protein Xa21; Contains: RecName: Full=Receptor kinase-like protein Xa21, processed; Flags: Precursor	Pkinase
Solyc07g053450.3	0	0	0	106.619	353.182	149.381	0	203.06	-10.0557	1.67135e-13	3.38226e-12	-	7	62020835	62025926	-	2970	protein_coding	- && F4IN23.1 RecName: Full=Basic leucine zipper 34; Short=AtbZIP34; Short=bZIP protein 34	bZIP_1
Solyc06g051045.1	0	0	0	148.134	305.711	112.993	0	188.946	-9.95175	1.67602e-13	3.38851e-12	-	6	34222178	34222708	+	531	protein_coding	- && -	-
Solyc03g081260.3	1344.31	1323.43	1161.82	3176.86	3195.73	3669.41	1276.52	3347.33	-1.39085	1.67735e-13	3.38851e-12	-	3	53580671	53588574	-	3027	protein_coding	- && F4HPF1.1 RecName: Full=Subtilisin-like protease SBT3.4; AltName: Full=Subtilase subfamily 3 member 4; Short=AtSBT3.4; Flags: Precursor	Peptidase_S8
Solyc09g092710.3	162.188	152.351	130.213	0	0	0	148.251	0	9.72825	1.7075e-13	3.44643e-12	-	9	72139167	72140011	+	384	protein_coding	- && P23137.1 RecName: Full=Glycine-rich protein; Flags: Precursor [Nicotiana tabacum]	-
Solyc03g119200.3	2490.52	2502.62	2010.73	835.023	731.048	849.365	2334.62	805.145	1.53583	1.71133e-13	3.45116e-12	-	3	69347461	69352530	+	1711	protein_coding	Uncharacterized protein At3g18270 [Source:Projected from Arabidopsis thaliana (AT3G18270) UniProtKB/TrEMBL;Acc:Q94K39] && B9I2J6.2 RecName: Full=L-Ala-D/L-amino acid epimerase; AltName: Full=L-Ala-D/L-Xxx epimerase	MR_MLE_N
Solyc07g017580.1	1060.21	829.807	1029.59	233.052	167.097	269.077	973.203	223.075	2.12521	1.74742e-13	3.52089e-12	-	7	7586596	7586943	+	348	protein_coding	- && -	-
Solyc03g090990.1	0	0	0	99.0705	405.399	151.296	0	218.589	-10.162	1.75067e-13	3.52437e-12	-	3	55531004	55531333	+	330	protein_coding	- && P14009.1 RecName: Full=14 kDa proline-rich protein DC2.15; Flags: Precursor	-
Solyc01g104550.3	0	0	0	302.873	226.91	81.3935	0	203.725	-10.0604	1.75404e-13	3.5281e-12	-	1	92912231	92915511	+	2623	protein_coding	WRKY9 [Source:Projected from Arabidopsis thaliana (AT1G68150) UniProtKB/TrEMBL;Acc:A0A178WJS2] && Q9C9F0.1 RecName: Full=Probable WRKY transcription factor 9; AltName: Full=WRKY DNA-binding protein 9	WRKY
Solyc09g055910.3	642.223	642.923	462.306	1797.42	1899.78	1932.38	582.484	1876.52	-1.68796	1.7563e-13	3.5296e-12	-	9	46301692	46309757	-	2578	protein_coding	- && -	DAO
Solyc03g005470.3	12925	13615.1	13129.3	1936.12	4145.14	3272.02	13223.1	3117.76	2.08449	1.77354e-13	3.56116e-12	-	3	365958	369880	+	839	protein_coding	- && -	-
Solyc01g080580.3	70.7533	80.2384	29.2726	576.496	491.796	491.233	60.0881	519.842	-3.11388	1.77913e-13	3.56931e-12	-	1	79673233	79678423	-	3478	protein_coding	- && -	-
Solyc10g009410.1	1517.39	1404.68	1652.39	67.9341	266.785	85.2237	1524.82	139.981	3.44533	1.78816e-13	3.58434e-12	-	10	3460978	3462354	+	1377	protein_coding	- && Q9LNJ3.1 RecName: Full=Aspartyl protease family protein 2; Flags: Precursor	-
Solyc02g078510.3	21.7703	23.3605	26.2444	297.212	171.844	432.822	23.7917	300.626	-3.6587	1.79362e-13	3.59218e-12	-	2	43736991	43738507	-	645	protein_coding	- && K4D9Y4.1 RecName: Full=Acylsugar acyltransferase 3; Short=Sl-ASAT3	-
Solyc12g006830.2	780.464	983.174	843.86	204.746	252.544	250.883	869.166	236.058	1.88063	1.8133e-13	3.62847e-12	-	12	1248074	1251632	-	688	protein_coding	Histone H2A [Source:UniProtKB/TrEMBL;Acc:K4DBM0] && Q84MP7.1 RecName: Full=Probable histone H2A variant 3	Histone
Solyc08g008020.1	0	0	0	128.32	282.925	130.23	0	180.492	-9.8857	1.86897e-13	3.73665e-12	-	8	2518720	2521722	+	3003	protein_coding	- && Q9FL59.1 RecName: Full=FT-interacting protein 1	C2
Solyc10g076460.2	138.241	220.402	144.344	1114.31	709.212	837.874	167.662	887.131	-2.40317	1.87568e-13	3.74686e-12	-	10	59539285	59541408	+	1429	protein_coding	- && Q700D9.2 RecName: Full=Putative Myb family transcription factor At1g14600	Myb_DNA-binding
Solyc08g068790.2	806.588	535.261	595.547	151.908	106.334	105.333	645.799	121.192	2.41348	1.89395e-13	3.7773e-12	-	8	57968454	57969182	+	642	protein_coding	- && Q9SMB8.1 RecName: Full=Tyramine N-feruloyltransferase 4/11; AltName: Full=Hydroxycinnamoyl-CoA: tyramine N-hydroxycinnamoyltransferase	Acetyltransf_1
Solyc09g010390.2	815.296	636.829	690.431	198.141	190.832	177.15	714.185	188.708	1.91995	1.89417e-13	3.7773e-12	-	9	3771745	3776040	+	1102	protein_coding	- && -	-
Solyc01g009680.3	316.757	234.621	127.185	11.3223	11.393	16.2787	226.188	12.998	4.1212	1.89595e-13	3.7776e-12	-	1	3901629	3909063	+	2754	protein_coding	- && O24370.1 RecName: Full=Linoleate 13S-lipoxygenase 2-1, chloroplastic; AltName: Full=Lipoxygenase 2-1; Flags: Precursor	Lipoxygenase
Solyc04g080330.3	0	0	0	135.868	356.979	112.993	0	201.947	-10.0478	1.90307e-13	3.78854e-12	-	4	64638899	64643815	+	4669	protein_coding	Peroxidase [Source:UniProtKB/TrEMBL;Acc:K4BVB2] && Q9FX85.1 RecName: Full=Peroxidase 10; Short=Atperox P10; AltName: Full=ATP5a; Flags: Precursor	-
Solyc10g079810.1	543.168	690.659	783.295	146.247	130.07	83.3086	672.374	119.875	2.48769	1.94852e-13	3.87571e-12	-	10	61435650	61435892	+	243	protein_coding	- && -	-
Solyc03g111710.3	527.929	375.8	489.56	5316.78	1484.88	4962.13	464.429	3921.27	-3.07787	1.96063e-13	3.89594e-12	-	3	63855417	63858784	+	2075	protein_coding	- && Q9FMK7.1 RecName: Full=BTB/POZ and TAZ domain-containing protein 1; AltName: Full=BTB and TAZ domain protein 1	zf-TAZ
Solyc10g074890.2	1601.2	1841.42	1702.86	20835	5159.11	14685.3	1715.16	13559.8	-2.98291	1.96205e-13	3.89594e-12	-	10	58650044	58680780	-	6589	protein_coding	- && C0LGU1.1 RecName: Full=Probable LRR receptor-like serine/threonine-protein kinase At5g37450; Flags: Precursor	-
Solyc01g006060.3	821.827	811.525	883.226	142.473	217.416	225.029	838.859	194.972	2.10529	1.98445e-13	3.93708e-12	-	1	737074	737652	+	579	protein_coding	Dirigent protein [Source:UniProtKB/TrEMBL;Acc:K4ASH2] && Q9C523.1 RecName: Full=Dirigent protein 19; Short=AtDIR19; Flags: Precursor	-
Solyc04g064760.3	26.1243	73.1286	63.5923	516.11	1388.99	473.997	54.2817	793.033	-3.8672	1.99522e-13	3.95505e-12	-	4	55911768	55915874	-	2011	protein_coding	- && Q9FH05.1 RecName: Full=Serine carboxypeptidase-like 42; Flags: Precursor	Peptidase_S10
Solyc01g068420.3	0	0	0	119.828	451.921	114.908	0	228.886	-10.2284	2.00126e-13	3.96365e-12	-	1	77482876	77503958	+	2892	protein_coding	- && Q8VY22.1 RecName: Full=Protein trichome birefringence-like 38	-
Solyc06g011530.3	28.3013	17.2665	51.4795	754.823	325.649	351.428	32.3491	477.3	-3.88225	2.00607e-13	3.9698e-12	-	6	8017678	8020839	+	629	protein_coding	- && O81027.2 RecName: Full=Hydroxymethylglutaryl-CoA lyase, mitochondrial; Short=HL; Short=HMG-CoA lyase; AltName: Full=3-hydroxy-3-methylglutarate-CoA lyase	HMGL-like
Solyc01g007170.3	0	0	0	150.965	348.435	102.46	0	200.62	-10.0382	2.0112e-13	3.97656e-12	-	1	1732797	1735826	-	2910	protein_coding	- && B8XCH5.1 RecName: Full=Protein QUIRKY	C2
Solyc05g009640.3	0	7.10973	0	433.08	222.163	149.381	2.36991	268.208	-6.80674	2.02126e-13	3.99307e-12	-	5	3847240	3849824	+	1857	protein_coding	- && Q9T072.2 RecName: Full=Transcription factor bHLH25; AltName: Full=Basic helix-loop-helix protein 25; Short=AtbHLH25; Short=bHLH 25; AltName: Full=Transcription factor EN 29; AltName: Full=bHLH transcription factor bHLH025	HLH
Solyc09g061620.3	3602.98	3549.79	2820.27	800.112	1179.17	1020.77	3324.34	1000.02	1.73303	2.02333e-13	3.99376e-12	-	9	60338931	60343494	+	1134	protein_coding	- && O48850.2 RecName: Full=Vesicle-associated membrane protein 725; Short=AtVAMP725	-
Solyc03g095780.2	1599.03	1741.88	1457.58	6221.63	4078.68	6962.49	1599.49	5754.27	-1.84702	2.03453e-13	4.01246e-12	-	3	58463917	58464447	+	531	protein_coding	- && O80920.1 RecName: Full=Abscisic acid receptor PYL4; AltName: Full=ABI1-binding protein 2; AltName: Full=PYR1-like protein 4; AltName: Full=Regulatory components of ABA receptor 10	-
Solyc08g074620.2	181.782	181.806	103.968	0	0	0	155.852	0	9.80032	2.05201e-13	4.0435e-12	-	8	58865793	58877981	+	3366	protein_coding	- && Q08307.1 RecName: Full=Polyphenol oxidase E, chloroplastic; Short=PPO; AltName: Full=Catechol oxidase; Flags: Precursor	-
Solyc09g008190.3	1123.35	813.556	1067.95	148.134	228.809	251.841	1001.62	209.595	2.25671	2.14354e-13	4.22029e-12	-	9	1630399	1634670	-	1125	protein_coding	- && A5VFP2.1 RecName: Full=Acylphosphatase; AltName: Full=Acylphosphate phosphohydrolase	-
Solyc02g090510.3	173.074	122.897	110.025	1550.22	679.78	775.632	135.332	1001.88	-2.88882	2.16892e-13	4.26665e-12	-	2	52688147	52693519	+	2562	protein_coding	- && Q9SCS2.1 RecName: Full=CDPK-related kinase 5; Short=AtCRK5; AltName: Full=Calcium/calmodulin-dependent protein kinase 1	Pkinase
Solyc10g076180.1	128.445	174.696	175.636	698.211	756.682	600.396	159.592	685.097	-2.10121	2.30287e-13	4.52633e-12	-	10	59102199	59103164	+	966	protein_coding	- && Q9LVL4.1 RecName: Full=Transcription repressor OFP3; AltName: Full=Ovate family protein 3; Short=AtOFP3	-
Solyc01g107830.3	148.038	152.351	282.632	5.66117	0.949413	8.61813	194.341	5.07624	5.25988	2.34545e-13	4.60612e-12	-	1	95140226	95141744	-	1444	protein_coding	Glycosyltransferase [Source:UniProtKB/TrEMBL;Acc:K4B2Z9] && Q9AT54.1 RecName: Full=Scopoletin glucosyltransferase; AltName: Full=Phenylpropanoid:glucosyltransferase 1	UDPGT
Solyc05g016310.1	715.153	826.76	851.935	194.367	135.766	91.9267	797.949	140.687	2.50367	2.36689e-13	4.6443e-12	-	5	15500178	15501758	+	1581	protein_coding	- && Q9LNJ3.1 RecName: Full=Aspartyl protease family protein 2; Flags: Precursor	-
Solyc08g008070.1	334.173	217.355	305.849	1522.86	1051	2245.5	285.792	1606.45	-2.49106	2.4152e-13	4.7351e-12	-	8	2550792	2552204	-	1413	protein_coding	- && Q9FN67.1 RecName: Full=BTB/POZ domain-containing protein At5g41330	K_tetra
Solyc10g078580.1	37.0094	7.10973	30.282	359.484	1272.21	356.216	24.8004	662.638	-4.74186	2.42302e-13	4.74643e-12	-	10	60490599	60490781	+	183	protein_coding	- && -	-
Solyc05g051290.3	475.68	400.176	573.34	2031.42	4575.22	2104.74	483.065	2903.79	-2.58762	2.49483e-13	4.88298e-12	-	5	62431086	62433086	-	1387	nontranslating_CDS	- && Q00423.1 RecName: Full=HMG-Y-related protein A; AltName: Full=Protein SB16A	-
Solyc04g073950.1	1839.59	2174.56	2028.9	301.929	121.525	403.137	2014.35	275.53	2.87009	2.52532e-13	4.9385e-12	-	4	60049149	60050543	+	1395	protein_coding	- && -	-
Solyc05g005490.3	828.358	939.5	870.104	4395.9	3409.34	2395.84	879.321	3400.36	-1.95119	2.54032e-13	4.96366e-12	-	5	355998	361530	-	1364	protein_coding	Carbonic anhydrase [Source:UniProtKB/TrEMBL;Acc:Q5NE21] && P27141.1 RecName: Full=Carbonic anhydrase, chloroplastic; AltName: Full=Carbonate dehydratase; Flags: Precursor	-
Solyc08g005250.3	27.2128	14.2195	29.2726	311.364	469.01	193.429	23.5683	324.601	-3.7847	2.5427e-13	4.96414e-12	-	8	166960	168143	+	915	protein_coding	- && -	-
Solyc08g066160.3	3991.58	4071.84	4470.64	997.31	1530.45	1396.14	4178.02	1307.97	1.67552	2.5508e-13	4.97577e-12	-	8	54625706	54632424	+	943	protein_coding	- && Q02921.1 RecName: Full=Early nodulin-93; Short=N-93	-
Solyc09g008780.3	1321.45	1434.13	1455.56	179.27	257.291	69.9026	1403.72	168.821	3.05558	2.58083e-13	5.03013e-12	-	9	2206586	2211433	+	2405	protein_coding	- && -	-
Solyc05g051200.1	4409.57	4044.42	4277.84	845.402	1445.96	1298.47	4243.94	1196.61	1.82647	2.65843e-13	5.17703e-12	-	5	62291782	62292456	-	675	protein_coding	- && Q8LDC8.2 RecName: Full=Ethylene-responsive transcription factor 1B; Short=AtERF1B; AltName: Full=Ethylene-responsive element-binding factor 1B; Short=EREBP-1B	AP2
Solyc04g007450.3	215.526	144.226	132.232	1324.71	692.122	917.352	163.994	978.063	-2.57706	2.68244e-13	5.21942e-12	-	4	1112941	1119528	-	2337	protein_coding	- && -	Abhydrolase_1
Solyc02g084650.3	1202.81	1247.25	1097.22	188.706	349.384	208.75	1182.43	248.947	2.24783	2.71023e-13	5.26908e-12	-	2	48380404	48381860	+	864	protein_coding	- && -	-
Solyc12g009240.1	161.1	215.323	181.692	6.6047	3.79765	14.3636	186.038	8.2553	4.49553	2.74788e-13	5.33782e-12	-	12	2519891	2520637	-	747	protein_coding	- && Q84QC2.1 RecName: Full=Ethylene-responsive transcription factor ERF017	AP2
Solyc09g057580.3	433.228	381.894	398.714	1301.13	1102.27	1269.74	404.612	1224.38	-1.59761	2.75412e-13	5.34548e-12	-	9	50068454	50076345	-	2433	protein_coding	- && Q9LVJ0.1 RecName: Full=UV-B-induced protein At3g17800, chloroplastic; Flags: Precursor	-
Solyc01g105620.3	628.072	548.465	600.594	148.134	83.5484	107.248	592.377	112.977	2.39032	2.78012e-13	5.39145e-12	-	1	93622238	93625970	+	1041	protein_coding	- && Q8LFY8.2 RecName: Full=RING-H2 finger protein ATL54; AltName: Full=RING-type E3 ubiquitin transferase ATL54	-
Solyc09g082505.1	70.7533	74.1443	72.6769	349.106	725.352	456.761	72.5249	510.406	-2.81498	2.90424e-13	5.62744e-12	-	9	68646637	68648720	+	915	protein_coding	- && Q9LUI3.1 RecName: Full=CRC domain-containing protein TSO1	-
Solyc06g060230.3	3297.11	4009.89	4052.75	1395.48	888.651	972.891	3786.58	1085.67	1.80231	2.9235e-13	5.66005e-12	-	6	38303221	38305529	-	2132	protein_coding	Nam-like protein 1 [Source:UniProtKB/TrEMBL;Acc:B6D1Q3] && Q7F2L3.1 RecName: Full=NAC domain-containing protein 48; Short=ONAC048	NAM
Solyc08g066590.3	0	0	0	167.948	267.735	96.7146	0	177.466	-9.86133	2.94346e-13	5.69396e-12	-	8	55401040	55403984	+	2649	protein_coding	- && -	-
Solyc10g076300.2	26.1243	17.2665	10.094	245.317	208.871	230.774	17.8283	228.321	-3.68351	2.95677e-13	5.71494e-12	-	10	59325427	59327185	-	1009	protein_coding	CASP-like protein [Source:UniProtKB/TrEMBL;Acc:K4D1X2] && D7LBN4.1 RecName: Full=CASP-like protein 4B1; Short=AlCASPL4B1	-
Solyc12g005710.2	35.9209	28.4389	21.1974	378.355	1137.4	222.156	28.5191	579.303	-4.34559	2.99162e-13	5.77681e-12	-	12	377747	379433	-	888	protein_coding	- && O82081.1 RecName: Full=Uclacyanin 1; Flags: Precursor	Cu_bind_like
Solyc07g054720.2	1726.38	1922.67	2221.69	416.096	293.369	133.102	1956.92	280.856	2.80059	2.99375e-13	5.77681e-12	-	7	63071958	63073466	+	1099	protein_coding	- && -	-
Solyc04g011545.1	501.805	475.336	486.531	1263.38	1412.73	1423.91	487.891	1366.67	-1.4861	3.00917e-13	5.80176e-12	-	4	3981805	3983685	+	366	protein_coding	- && -	-
Solyc08g068410.2	115.382	157.43	159.485	0	0	0	144.099	0	9.68755	3.04389e-13	5.86383e-12	-	8	57601243	57603146	+	1822	protein_coding	- && -	-
Solyc03g007220.3	308.049	287.436	273.548	45.2894	27.533	43.0907	289.678	38.6377	2.90628	3.16329e-13	6.08882e-12	-	3	1783277	1783911	+	539	protein_coding	- && -	-
Solyc04g074100.3	4619.65	4391.78	4855.22	1388.87	1934.9	1481.36	4622.22	1601.71	1.52897	3.16727e-13	6.09143e-12	-	4	60200644	60202415	+	932	protein_coding	- && Q56XJ7.1 RecName: Full=Uncharacterized protein At4g22758	-
Solyc06g074110.3	324.377	244.778	404.77	4031.7	1428.87	1844.28	324.642	2434.95	-2.90696	3.26985e-13	6.28352e-12	-	6	45949077	45957680	-	5045	protein_coding	- && Q9XIN0.1 RecName: Full=Transcription factor LHW; AltName: Full=BHLH transcription factor delta; Short=bHLH delta; AltName: Full=Basic helix-loop-helix protein 156; Short=AtbHLH156; Short=bHLH 156; AltName: Full=Protein LONESOME HIGHWAY; AltName: Full=bHLH transcription factor bHLH156	-
Solyc08g007450.1	0	0	0	79.2564	423.438	164.702	0	222.466	-10.1873	3.27844e-13	6.29483e-12	-	8	2025994	2026602	-	609	protein_coding	- && P17407.1 RecName: Full=21 kDa protein; AltName: Full=1.2 protein; Flags: Precursor	-
Solyc09g025230.3	0	0	0	286.833	99.6884	153.211	0	179.911	-9.88108	3.31013e-13	6.35043e-12	-	9	65287997	65290087	-	1654	protein_coding	- && Q9M0R2.2 RecName: Full=Patellin-5	-
Solyc11g006360.1	407.104	410.333	479.466	10.3788	2.84824	34.4725	432.301	15.8999	4.766	3.36282e-13	6.4462e-12	-	11	1074455	1074793	-	339	protein_coding	- && -	-
novel.805	434.317	281.342	440.099	11.3223	6.64589	37.3452	385.253	18.4378	4.38599	3.40447e-13	6.52065e-12	-	7	17022710	17027140	-	535	-	- && - && -	-
Solyc01g104030.3	1862.45	2066.9	1998.61	519.884	323.75	601.354	1975.99	481.663	2.03652	3.4277e-13	6.55974e-12	-	1	92388487	92394077	-	2756	protein_coding	- && Q38898.1 RecName: Full=Potassium channel AKT2/3	Ion_trans
Solyc05g007770.3	666.17	428.615	669.233	3864.69	1912.12	4718.91	588.006	3498.57	-2.57294	3.44334e-13	6.58099e-12	NAP1	5	2229594	2232225	+	2015	protein_coding	NAC domain-containing protein 1 [Source:UniProtKB/Swiss-Prot;Acc:K4BWV2] && O49255.1 RecName: Full=NAC transcription factor 29; Short=AtNAC029; AltName: Full=Protein NAC-LIKE, ACTIVATED BY AP3/PI; Short=AtNAP	NAM
Solyc01g079580.3	121.913	157.43	79.7427	885.03	2476.07	722.008	119.695	1361.04	-3.50735	3.44446e-13	6.58099e-12	-	1	78535393	78538096	+	2332	protein_coding	- && -	-
Solyc06g084820.2	0	0	0	173.609	258.24	92.8843	0	174.911	-9.84042	3.49908e-13	6.67985e-12	-	6	41687592	41690457	+	1880	protein_coding	- && Q8VWZ7.1 RecName: Full=Geraniol 8-hydroxylase; AltName: Full=Cytochrome P450 76B6; AltName: Full=Geraniol 10-hydroxylase; Short=CrG10H	p450
Solyc07g052240.3	68.5763	92.4265	57.5359	424.588	955.11	475.912	72.8462	618.537	-3.08579	3.61625e-13	6.89787e-12	-	7	60851113	60857879	-	3159	protein_coding	- && P29162.1 RecName: Full=L-ascorbate oxidase homolog; AltName: Full=Pollen-specific protein NTP303; Flags: Precursor	-
Solyc07g061880.2	0	0	0	151.908	135.766	152.254	0	146.643	-9.58607	3.63604e-13	6.92994e-12	-	7	64901130	64903727	+	1080	protein_coding	- && P92519.1 RecName: Full=Uncharacterized mitochondrial protein AtMg00810; AltName: Full=ORF240b	-
Solyc02g072190.3	856.66	455.023	710.619	3516.53	2308.02	3462.57	674.1	3095.71	-2.19944	3.72187e-13	7.08771e-12	-	2	42073823	42075795	-	1448	protein_coding	- && Q9LP56.1 RecName: Full=Probable WRKY transcription factor 65; AltName: Full=WRKY DNA-binding protein 65	WRKY
Solyc03g113680.3	37.0094	94.4578	75.7051	621.785	1295.95	467.294	69.0575	795.01	-3.52376	3.78218e-13	7.19666e-12	-	3	65228807	65232834	-	2520	protein_coding	TORTIFOLIA1-like protein 3 [Source:Projected from Arabidopsis thaliana (AT5G62580) UniProtKB/Swiss-Prot;Acc:Q6NPR6] && Q9T041.2 RecName: Full=Microtubule-associated protein TORTIFOLIA1; AltName: Full=Microtubule-associated protein SPIRAL2; AltName: Full=Protein CONVOLUTA	-
Solyc01g095560.3	1102.66	972.002	1161.82	305.703	368.372	339.937	1078.83	338.004	1.67436	3.89058e-13	7.39688e-12	-	1	86649245	86656160	+	6676	protein_coding	- && O04619.1 RecName: Full=Mitochondrial adenine nucleotide transporter ADNT1; AltName: Full=Adenine nucleotide transporter 1	-
Solyc01g098610.3	4239.76	4558.35	4062.84	1412.46	1828.57	1401.88	4286.98	1547.64	1.46989	3.94798e-13	7.49988e-12	-	1	88948288	88960465	-	7747	protein_coding	Glutathione synthetase, chloroplastic [Source:Projected from Arabidopsis thaliana (AT5G27380) UniProtKB/Swiss-Prot;Acc:P46416] && O22494.1 RecName: Full=Glutathione synthetase, chloroplastic; Short=GSH synthetase; Short=GSH-S; Short=Glutathione synthase; Flags: Precursor	-
Solyc03g114380.3	0	0	0	131.15	336.092	103.418	0	190.22	-9.96145	3.96428e-13	7.52469e-12	-	3	65866549	65872376	+	3528	protein_coding	- && F4ICA0.1 RecName: Full=Kinesin-like protein KIN-8A	Kinesin
Solyc06g043113.1	18.5047	7.10973	24.2256	260.414	253.493	215.453	16.6134	243.12	-3.87193	4.02367e-13	7.63119e-12	-	6	29865723	29867792	+	1455	nontranslating_CDS	- && -	-
Solyc05g006730.3	0	13.2038	15.141	4764.82	3803.35	1762.89	9.44827	3443.69	-8.50597	4.04846e-13	7.67195e-12	-	5	1377092	1382674	+	1870	protein_coding	- && Q9FUS8.1 RecName: Full=Glutathione S-transferase U17; Short=AtGSTU17; AltName: Full=GST class-tau member 17; AltName: Full=Glutathione S-transferase 30; AltName: Full=Protein EARLY RESPONSIVE TO DEHYDRATION 9	GST_C
Solyc03g034110.3	0	0	0	109.449	294.318	129.272	0	177.68	-9.86304	4.11504e-13	7.7857e-12	-	3	5848334	5850191	+	1641	protein_coding	- && O23208.3 RecName: Full=Homeobox-leucine zipper protein ATHB-40; AltName: Full=HD-ZIP protein ATHB-40; AltName: Full=Homeodomain transcription factor ATHB-40	Homeobox
Solyc05g055760.3	5777.83	6989.88	6006.95	470.821	1539.95	750.735	6258.22	920.501	2.76527	4.11518e-13	7.7857e-12	-	5	66118006	66121236	-	1062	protein_coding	Isopentenyl diphosphate isomerase [Source:UniProtKB/TrEMBL;Acc:A9LRT7] && O48965.1 RecName: Full=Isopentenyl-diphosphate Delta-isomerase II; AltName: Full=Isopentenyl pyrophosphate isomerase II; Short=IPP isomerase II	NUDIX
Solyc04g011540.3	735.835	766.835	805.502	175.496	225.011	138.848	769.391	179.785	2.09741	4.12053e-13	7.78948e-12	-	4	3971963	3975060	+	1144	protein_coding	- && Q0JHU5.1 RecName: Full=Elicitor-responsive protein 1; Short=OsERG1; AltName: Full=17 kDa phloem protein; AltName: Full=Fungal elicitor immediate early-responsive gene 1 protein; Short=FIERG1; AltName: Full=RPP17 >A2WWV5.2 RecName: Full=Elicitor-responsive protein 1; AltName: Full=17 kDa phloem protein; AltName: Full=Fungal elicitor immediate early-responsive gene 1 protein; Short=FIERG1; Alt…	C2
Solyc04g011470.2	0	0	0	153.795	212.669	107.248	0	157.904	-9.69284	4.12663e-13	7.79467e-12	-	4	3911679	3913251	+	733	protein_coding	CASP-like protein [Source:UniProtKB/TrEMBL;Acc:K4BPK0] && B9SXY8.1 RecName: Full=CASP-like protein 4D1; Short=RcCASPL4D1	-
Solyc03g044180.1	168.72	173.681	159.485	11.3223	13.2918	5.74542	167.295	10.1199	4.04637	4.13897e-13	7.81164e-12	-	3	8430700	8430966	+	267	protein_coding	- && -	-
Solyc09g009530.3	3030.42	2862.17	3213.93	1064.3	1135.5	789.038	3035.51	996.279	1.60729	4.16094e-13	7.845e-12	-	9	2937025	2939581	-	1221	protein_coding	- && -	-
Solyc04g074470.1	14.1507	17.2665	33.3102	403.83	275.33	203.962	21.5758	294.374	-3.7673	4.1634e-13	7.845e-12	-	4	60539581	60540510	+	930	protein_coding	- && Q9FE06.1 RecName: Full=Protein EXORDIUM-like 2; Flags: Precursor	-
Solyc02g093720.3	0	0	0	128.32	350.333	102.46	0	193.704	-9.98763	4.23221e-13	7.96741e-12	-	2	55100806	55104668	-	2010	protein_coding	- && Q67Y69.1 RecName: Full=Protein WVD2-like 7	-
Solyc04g051270.2	0	0	0	179.27	162.35	112.036	0	151.219	-9.63044	4.23521e-13	7.96741e-12	-	4	50165845	50167991	+	1428	protein_coding	CASP-like protein [Source:UniProtKB/TrEMBL;Acc:K4BS87] && -	-
Solyc09g066250.1	23.9473	49.7681	56.5265	378.355	319.952	446.228	43.414	381.512	-3.13287	4.30865e-13	8.099e-12	-	9	64911106	64911510	+	405	protein_coding	- && Q9LHS9.2 RecName: Full=Probable transcriptional regulator RABBIT EARS	-
Solyc08g023440.3	255.801	245.794	130.213	1600.22	1434.56	869.474	210.602	1301.42	-2.62794	4.33561e-13	8.14311e-12	-	8	27934187	27940103	+	2685	protein_coding	Hyperosmolality-gated Ca2+ permeable channel 3.1 [Source:Projected from Arabidopsis thaliana (AT1G30360) UniProtKB/TrEMBL;Acc:A0A097NUQ9] && A9LIW2.2 RecName: Full=CSC1-like protein ERD4; AltName: Full=Protein EARLY-RESPONSIVE TO DEHYDRATION STRESS 4	-
Solyc07g043710.3	0	0	0	167.005	423.438	73.7329	0	221.392	-10.1804	4.34585e-13	8.14923e-12	-	7	57801353	57802893	+	1473	protein_coding	- && K4D9Y4.1 RecName: Full=Acylsugar acyltransferase 3; Short=Sl-ASAT3	-
Solyc01g079980.3	149.126	82.2697	43.4043	787.846	1959.59	759.353	91.6001	1168.93	-3.67505	4.34588e-13	8.14923e-12	-	1	78975437	78976889	-	1453	protein_coding	- && P13917.2 RecName: Full=Basic 7S globulin; AltName: Full=SBg7S; Short=Bg; Contains: RecName: Full=Basic 7S globulin high kDa subunit; Contains: RecName: Full=Basic 7S globulin low kDa subunit; Flags: Precursor	-
Solyc02g021440.3	9707.36	9870.34	8857.5	3675.99	2519.74	3520.99	9478.4	3238.91	1.54913	4.49392e-13	8.42003e-12	-	2	23203603	23210735	-	2585	protein_coding	CBL-interacting serine/threonine-protein kinase 23 [Source:Projected from Arabidopsis thaliana (AT1G30270) UniProtKB/Swiss-Prot;Acc:Q93VD3] && Q93VD3.1 RecName: Full=CBL-interacting serine/threonine-protein kinase 23; AltName: Full=Protein LOW-K(+)-SENSITIVE 1; AltName: Full=SNF1-related kinase 3.23; AltName: Full=SOS2-like protein kinase PKS17	-
Solyc04g081900.3	1325.81	1248.27	1275.88	208.52	356.979	355.259	1283.32	306.919	2.06402	4.63428e-13	8.67602e-12	-	4	65850448	65852911	+	2262	protein_coding	- && Q0JIL1.1 RecName: Full=Probable nucleoredoxin 2; Short=OsNrx2	-
Solyc01g096190.3	201.375	274.232	327.046	4004.34	1889.33	1119.4	267.551	2337.69	-3.12695	4.64422e-13	8.68764e-12	LCA1	1	87159841	87165677	+	3497	protein_coding	Calcium-transporting ATPase, endoplasmic reticulum-type [Source:UniProtKB/Swiss-Prot;Acc:Q42883] && Q42883.1 RecName: Full=Calcium-transporting ATPase, endoplasmic reticulum-type	E1-E2_ATPase
Solyc02g093480.3	26.1243	37.58	76.7145	636.882	810.799	323.659	46.8063	590.447	-3.65515	4.76382e-13	8.90421e-12	-	2	54973034	54978138	-	2064	protein_coding	- && -	-
Solyc05g006050.3	416.9	522.057	640.97	3078.73	2532.09	1638.4	526.643	2416.41	-2.19776	4.7838e-13	8.93438e-12	-	5	786227	789498	-	1974	protein_coding	Cyclin-D1-1 [Source:Projected from Arabidopsis thaliana (AT1G70210) UniProtKB/Swiss-Prot;Acc:P42751] && P42751.3 RecName: Full=Cyclin-D1-1; AltName: Full=Cyclin-delta-1; Short=Cyclin-d1; AltName: Full=G1/S-specific cyclin-D1-1; Short=CycD1;1	Cyclin_C
Solyc07g009387.1	154.569	103.599	169.579	0	0	0	142.582	0	9.67204	4.81151e-13	8.97891e-12	-	7	4465060	4467098	+	648	protein_coding	- && P10978.1 RecName: Full=Retrovirus-related Pol polyprotein from transposon TNT 1-94; Includes: RecName: Full=Protease; Includes: RecName: Full=Reverse transcriptase; Includes: RecName: Full=Endonuclease	-
Solyc03g112297.1	72.9304	143.21	140.307	1834.22	489.897	1768.63	118.816	1364.25	-3.52063	4.88162e-13	9.10244e-12	-	3	64228674	64229500	-	728	protein_coding	- && -	-
Solyc01g096860.2	0	0	0	81.1435	376.917	155.126	0	204.396	-10.0651	4.92628e-13	9.17836e-12	-	1	87728958	87731834	-	1179	protein_coding	- && Q6X5Y6.1 RecName: Full=Ethylene-responsive transcription factor WRI1; AltName: Full=Protein ACTIVATOR OF SPORAMIN::LUC 1; AltName: Full=Protein WRINKLED 1	AP2
Solyc04g051280.3	349.413	492.603	633.904	3.77411	1.89883	29.6847	491.973	11.7859	5.38503	4.98529e-13	9.28087e-12	-	4	50211740	50216883	-	2839	protein_coding	- && -	-
novel.460	174.162	248.841	183.711	1.88706	0	0	202.238	0.629019	8.31996	5.04405e-13	9.38274e-12	-	3	6224703	6225715	-	886	-	- && - && -	-
Solyc08g083240.3	340.705	206.182	318.971	1269.99	6516.77	2455.21	288.619	3413.99	-3.56434	5.07102e-13	9.42536e-12	-	8	65877803	65882658	-	4378	protein_coding	- && -	-
Solyc01g073820.3	391.865	457.054	343.196	1996.51	1338.67	1331.02	397.372	1555.4	-1.96874	5.10562e-13	9.4821e-12	-	1	81057583	81058530	-	948	protein_coding	- && -	C1_3
Solyc01g067370.3	0	0	0	166.061	263.937	88.0965	0	172.698	-9.82205	5.35766e-13	9.94223e-12	-	1	75651793	75653357	+	1079	protein_coding	TSB [Source:UniProtKB/TrEMBL;Acc:Q8LKG9] && -	-
Solyc10g085170.2	4.35405	0	0	115.111	422.489	172.363	1.45135	236.654	-7.39542	5.54971e-13	1.02904e-11	-	10	64570274	64572820	+	633	protein_coding	- && Q9SRM5.1 RecName: Full=GDSL esterase/lipase CPRD49; AltName: Full=Extracellular lipase CPRD49; Flags: Precursor	Lipase_GDSL
Solyc03g093470.3	35.9209	34.533	38.3573	220.786	346.536	270.035	36.2704	279.119	-2.94389	5.74729e-13	1.06483e-11	-	3	56185130	56188414	-	1304	protein_coding	- && P27061.1 RecName: Full=Acid phosphatase 1; AltName: Full=Apase-1(1); Flags: Precursor	-
Solyc02g092080.2	1375.88	1199.51	1390.96	313.252	427.236	432.822	1322.12	391.103	1.75726	5.85952e-13	1.08476e-11	-	2	53928662	53937966	+	6685	protein_coding	- && Q9AT35.1 RecName: Full=60S ribosomal protein L23a	-
Solyc01g065700.3	33.7439	50.7838	45.4231	585.931	220.264	667.426	43.3169	491.207	-3.50232	6.02281e-13	1.1141e-11	-	1	72100698	72104700	-	1584	protein_coding	- && Q9M9W9.1 RecName: Full=Probable protein phosphatase 2C 34; Short=AtPP2C34	PP2C
Solyc11g005420.2	394.042	509.869	333.102	1686.09	1283.61	1745.65	412.338	1571.78	-1.93045	6.46301e-13	1.19458e-11	-	11	322921	326008	-	1236	protein_coding	- && -	-
Solyc02g071820.3	10389.9	10299	10573.5	3789.21	2072.57	2075.05	10420.8	2645.61	1.97777	6.47129e-13	1.19516e-11	-	2	41737052	41746135	-	3346	protein_coding	- && C0LGG8.1 RecName: Full=Probable LRR receptor-like serine/threonine-protein kinase At1g53430; Flags: Precursor	Pkinase_Tyr
Solyc03g025720.3	3471.27	2967.8	3430.96	318.913	340.839	853.195	3290.01	504.316	2.70576	6.50473e-13	1.20038e-11	-	3	3160346	3166495	+	4280	protein_coding	- && Q9SMT7.1 RecName: Full=Oxalate--CoA ligase; AltName: Full=4-coumarate--CoA ligase isoform 8; Short=At4CL8; AltName: Full=4-coumarate--CoA ligase-like 10; AltName: Full=Acyl-activating enzyme 3; AltName: Full=Adenosine monophosphate binding protein 3; Short=AtMPBP3; AltName: Full=Oxalyl-CoA synthetase	-
Solyc01g112140.3	213.349	240.715	166.551	2084.25	1067.14	870.431	206.872	1340.61	-2.69618	6.67615e-13	1.23104e-11	-	1	98139368	98142075	-	1311	protein_coding	- && Q9LMA1.1 RecName: Full=Probable flavin-containing monooxygenase 1	FMO-like
Solyc09g014730.3	0	0	0	311.364	192.731	69.9026	0	191.333	-9.9699	6.75492e-13	1.24457e-11	-	9	6804604	6816932	-	4110	protein_coding	- && Q9LMP1.1 RecName: Full=Wall-associated receptor kinase 2; Flags: Precursor	Pkinase
Solyc04g008100.2	610.656	618.546	818.625	99.0705	63.6107	22.9817	682.609	61.8876	3.46299	6.77582e-13	1.24744e-11	-	4	1757920	1759176	-	1257	protein_coding	- && Q5PNY6.1 RecName: Full=U-box domain-containing protein 21; AltName: Full=Plant U-box protein 21	U-box
Solyc01g095810.3	68.5763	169.618	121.128	1340.75	619.967	943.207	119.774	967.976	-3.01371	6.79145e-13	1.24933e-11	-	1	86853653	86880123	-	6737	protein_coding	- && Q9FGN3.1 RecName: Full=F-box protein At5g51380	-
Solyc11g011020.2	213.349	146.257	240.238	1300.18	2403.91	834.044	199.948	1512.71	-2.91952	6.80452e-13	1.25074e-11	-	11	4060572	4064034	+	2504	protein_coding	- && Q9LP77.1 RecName: Full=Probable inactive receptor kinase At1g48480; Flags: Precursor	Pkinase
Solyc07g065700.3	1184.3	1318.35	1313.23	3080.62	3159.65	2956.02	1271.96	3065.43	-1.26895	7.09058e-13	1.30229e-11	-	7	67498992	67505984	-	4086	protein_coding	- && -	CRAL_TRIO_N
Solyc05g052900.3	37.0094	41.6427	20.188	368.92	250.645	880.965	32.9467	500.176	-3.92492	7.1651e-13	1.31494e-11	-	5	63927501	63930244	+	1251	protein_coding	- && Q39434.1 RecName: Full=Ras-related protein Rab2BV	Ras
Solyc08g067500.2	123.002	136.101	213.993	678.397	849.725	1169.19	157.699	899.105	-2.51069	7.17315e-13	1.31538e-11	-	8	56575539	56583027	+	705	protein_coding	- && Q9M5X8.1 RecName: Full=Non-specific lipid-transfer protein; Short=LTP; AltName: Allergen=Pru av 3; Flags: Precursor	-
Solyc12g087940.2	6250.24	6572.44	6821.53	760.484	1614	468.252	6548.07	947.579	2.78874	7.21755e-13	1.32248e-11	-	12	64422002	64424168	-	1366	protein_coding	- && O04496.1 RecName: Full=Aspartyl protease AED3; AltName: Full=Apoplastic EDS1-dependent protein 3; Flags: Precursor	-
Solyc12g088640.2	217.703	146.257	165.542	6.6047	0	0.95757	176.501	2.52076	6.12562	7.2366e-13	1.32493e-11	-	12	64898598	64902467	-	1011	protein_coding	- && Q8L9J9.2 RecName: Full=Probable carbohydrate esterase At4g34215	-
Solyc12g096960.2	1466.23	1413.82	1450.51	283.059	457.617	240.35	1443.52	327.009	2.14215	7.29155e-13	1.33394e-11	-	12	66645220	66646679	+	731	protein_coding	- && P17642.1 RecName: Full=Pathogenesis-related protein STH-2	-
Solyc01g100010.3	864.279	817.619	657.12	133.981	198.427	100.545	779.673	144.318	2.43347	7.30193e-13	1.33429e-11	-	1	89957452	89968203	-	3155	protein_coding	- && O80494.2 RecName: Full=F-box protein PP2-B15; AltName: Full=Protein PHLOEM PROTEIN 2-LIKE B15; Short=AtPP2-B15	-
Solyc08g078670.2	903.466	1132.48	851.935	2681.51	3468.21	2757.8	962.626	2969.17	-1.62496	7.30496e-13	1.33429e-11	-	8	62570510	62572436	+	1741	protein_coding	- && Q940R4.1 RecName: Full=Probable aspartyl protease At4g16563; Flags: Precursor	-
Solyc02g036480.1	3632.37	3715.34	3497.58	825.588	483.251	229.817	3615.1	512.885	2.81726	7.37852e-13	1.34667e-11	-	2	31317822	31318592	-	771	protein_coding	- && Q9FNH6.1 RecName: Full=NDR1/HIN1-Like protein 3	-
Solyc06g065850.2	44.629	154.383	43.4043	1333.21	656.994	1112.7	80.8053	1034.3	-3.67716	7.40937e-13	1.35124e-11	-	6	41397105	41400615	-	1595	protein_coding	- && D2XNR1.1 RecName: Full=Flotillin-like protein 4	-
Solyc07g008420.3	0	0	0	66.9905	391.158	171.405	0	209.851	-10.1031	7.45265e-13	1.35806e-11	-	7	3213588	3215368	-	936	protein_coding	- && Q9T076.1 RecName: Full=Early nodulin-like protein 2; AltName: Full=Phytocyanin-like protein; Flags: Precursor	Cu_bind_like
Solyc07g053970.3	436.494	767.851	551.133	4553.47	2386.82	2433.19	585.159	3124.49	-2.41655	7.54204e-13	1.37328e-11	-	7	62488876	62510284	-	3147	protein_coding	AT4G03560 protein [Source:Projected from Arabidopsis thaliana (AT4G03560) UniProtKB/TrEMBL;Acc:B9DFD5] && Q75VR0.1 RecName: Full=Two pore calcium channel protein 1B; AltName: Full=Voltage-dependent calcium channel protein TPC1B; Short=NtTPC1B	Ion_trans
Solyc05g052350.3	74.0189	84.3011	80.7521	392.508	367.423	373.452	79.6907	377.794	-2.24471	7.57484e-13	1.37817e-11	-	5	63455860	63459062	+	2958	protein_coding	- && C0LGP9.1 RecName: Full=Probable leucine-rich repeat receptor-like protein kinase IMK3; AltName: Full=Protein INFLORESCENCE MERISTEM RECEPTOR-LIKE KINASE 3; AltName: Full=Protein MERISTEMATIC RECEPTOR-LIKE KINASE; Flags: Precursor	Pkinase_Tyr
Solyc04g054257.1	366.829	262.044	425.967	46.2329	25.6342	50.7512	351.614	40.8728	3.10485	7.72264e-13	1.40396e-11	-	4	52095491	52097736	-	1674	protein_coding	- && H2DH18.1 RecName: Full=Cytochrome P450 CYP736A12 [Panax ginseng]	p450
Solyc10g083580.2	108.851	206.182	116.081	0	0	0	143.705	0	9.68358	7.74115e-13	1.40623e-11	-	10	63490602	63492575	+	603	protein_coding	- && -	-
Solyc01g096590.3	4635.98	5592.31	4433.29	650.091	1395.64	1217.07	4887.19	1087.6	2.16788	7.92123e-13	1.43782e-11	-	1	87532948	87534986	-	622	protein_coding	- && Q9STY6.1 RecName: Full=40S ribosomal protein S20-2	Ribosomal_S10
Solyc01g068250.2	46.8061	116.803	78.7333	642.543	514.582	557.306	80.7807	571.477	-2.82108	8.22706e-13	1.49217e-11	-	1	77180008	77181381	-	1374	protein_coding	- && -	-
Solyc04g074400.1	0	0	0	189.649	156.653	98.6297	0	148.311	-9.60243	8.41243e-13	1.5246e-11	-	4	60492687	60493616	-	930	protein_coding	- && Q9ZPE7.1 RecName: Full=Protein EXORDIUM; Flags: Precursor	-
Solyc11g069760.1	0	0	0	145.303	78.8013	351.428	0	191.844	-9.97365	8.80685e-13	1.59483e-11	-	11	54671084	54671635	-	552	protein_coding	- && Q9FJH8.1 RecName: Full=High affinity nitrate transporter 2.4; Short=AtNRT2:4	-
Solyc12g042890.2	1651.27	1479.84	1818.94	89.6352	318.053	238.435	1650.02	215.375	2.93764	8.92776e-13	1.61547e-11	-	12	59269845	59272561	-	1213	protein_coding	- && -	Abhydrolase_2
Solyc03g098020.3	707.533	833.87	760.079	46.2329	122.474	133.102	767.161	100.603	2.9311	9.10508e-13	1.64628e-11	-	3	61802987	61810168	+	2035	protein_coding	- && O07427.2 RecName: Full=Monoacylglycerol lipase; Short=MGL	-
Solyc02g038750.3	1931.02	1934.86	1681.66	618.011	694.971	722.008	1849.18	678.33	1.44682	9.20468e-13	1.66299e-11	-	2	31989088	31995229	-	1762	protein_coding	WD repeat-containing protein 55 [Source:Projected from Arabidopsis thaliana (AT2G34260) UniProtKB/Swiss-Prot;Acc:O80775] && O80775.2 RecName: Full=WD repeat-containing protein 55; AltName: Full=Protein WD repeat domain 55; AltName: Full=Protein WDR55 homolog	-
Solyc07g042580.3	20.6817	27.4232	20.188	201.915	678.83	243.223	22.7643	374.656	-4.04022	9.27296e-13	1.67403e-11	-	7	56164858	56172009	+	3591	protein_coding	TORTIFOLIA1-like protein 2 [Source:Projected from Arabidopsis thaliana (AT2G07170) UniProtKB/Swiss-Prot;Acc:F4IK92] && Q9T041.2 RecName: Full=Microtubule-associated protein TORTIFOLIA1; AltName: Full=Microtubule-associated protein SPIRAL2; AltName: Full=Protein CONVOLUTA	-
Solyc02g078500.2	4.35405	67.0346	19.1786	3894.89	3804.3	1932.38	30.1891	3210.52	-6.73118	9.33384e-13	1.68371e-11	-	2	43733333	43735828	+	1289	protein_coding	- && -	-
Solyc08g007435.1	11.9736	0	25.235	682.171	302.863	586.99	12.4029	524.008	-5.40007	9.60628e-13	1.73151e-11	-	8	2002964	2003458	+	495	protein_coding	- && O22150.1 RecName: Full=Auxin-responsive protein SAUR36; AltName: Full=Protein RESPONSE TO AUXINS AND GIBBERELLINS 1; AltName: Full=Protein SENESCENCE-ASSOCIATED GENE 201; AltName: Full=Protein SMALL AUXIN UP RNA 36	Auxin_inducible
Solyc02g070020.1	3977.43	4250.6	3584.38	1122.8	540.216	1038.01	3937.47	900.34	2.12872	9.62389e-13	1.73334e-11	-	2	40377628	40379067	-	1440	protein_coding	UDP-glycosyltransferase 91C1 [Source:Projected from Arabidopsis thaliana (AT5G49690) UniProtKB/Swiss-Prot;Acc:Q9LTA3] && Q9LTA3.1 RecName: Full=UDP-glycosyltransferase 91C1	UDPGT
Solyc10g006720.3	1158.18	1277.72	1360.67	192.48	37.9765	129.272	1265.52	119.909	3.39966	9.88689e-13	1.77933e-11	-	10	1177458	1182034	+	2622	protein_coding	- && O81832.4 RecName: Full=G-type lectin S-receptor-like serine/threonine-protein kinase At4g27290; Flags: Precursor	Pkinase_Tyr
Solyc10g085070.2	1538.07	1710.4	1399.03	365.146	549.71	426.119	1549.17	446.992	1.79319	9.89823e-13	1.78e-11	-	10	64513151	64517149	+	2399	protein_coding	- && Q9SS80.1 RecName: Full=UPF0503 protein At3g09070, chloroplastic; Flags: Precursor	-
Solyc04g076060.3	15392.7	15499.2	15735.6	6739.63	7581.06	7151.13	15542.5	7157.27	1.11874	1.04984e-12	1.88647e-11	-	4	61112239	61116622	-	2298	protein_coding	- && P93207.2 RecName: Full=14-3-3 protein 10	-
Solyc05g046290.3	1014.49	873.481	889.283	4525.16	2744.75	7136.77	925.753	4802.23	-2.37505	1.06089e-12	1.90484e-11	-	5	59336798	59339610	+	1093	protein_coding	Xyloglucan endotransglucosylase/hydrolase [Source:UniProtKB/TrEMBL;Acc:K4C0W2] && Q38910.1 RecName: Full=Probable xyloglucan endotransglucosylase/hydrolase protein 23; Short=At-XTH23; Short=XTH-23; Flags: Precursor	-
Solyc01g098730.2	618.275	1297.02	1007.38	155.682	180.389	204.92	974.225	180.33	2.43383	1.08185e-12	1.94099e-11	-	1	89045620	89046569	-	950	protein_coding	- && Q8LGA5.2 RecName: Full=E3 ubiquitin-protein ligase ATL31; AltName: Full=Protein CARBON/NITROGEN INSENSITIVE 1; AltName: Full=Protein SUPER SURVIVAL 1; AltName: Full=RING-H2 finger protein ATL31; AltName: Full=RING-type E3 ubiquitin transferase ATL31; Flags: Precursor	-
Solyc03g112530.3	1529.36	1418.9	1491.9	534.037	569.648	581.245	1480.05	561.643	1.39791	1.10532e-12	1.98157e-11	-	3	64399598	64407535	-	1933	protein_coding	NLE [Source:Projected from Arabidopsis thaliana (AT5G52820) UniProtKB/TrEMBL;Acc:A0A178UNZ3] && Q9FLX9.1 RecName: Full=Notchless protein homolog	WD40
Solyc09g083260.3	0	0	0	284.946	158.552	76.6056	0	173.368	-9.82766	1.14097e-12	2.0439e-11	-	9	69324289	69333990	+	1767	protein_coding	- && Q940Y9.1 RecName: Full=Putative ion channel POLLUX-like 2	-
Solyc03g006840.3	0	0	0	98.127	311.408	113.951	0	174.495	-9.83695	1.16019e-12	2.07674e-11	-	3	1353456	1356805	+	2886	protein_coding	- && -	-
Solyc02g082820.3	0	0	0	155.682	282.925	77.5632	0	172.057	-9.81668	1.17187e-12	2.09602e-11	-	2	47024618	47029901	+	4073	protein_coding	Cyclin B2 [Source:UniProtKB/TrEMBL;Acc:Q9XGI1] && P46277.1 RecName: Full=G2/mitotic-specific cyclin-1; AltName: Full=B-like cyclin; AltName: Full=CycMs1	Cyclin_C
Solyc08g016050.3	970.954	816.603	765.126	3036.28	2514.05	2224.44	850.894	2591.59	-1.60696	1.19372e-12	2.13346e-11	-	8	6604746	6653925	-	5939	protein_coding	Guanine nucleotide exchange factor SPIKE 1 [Source:Projected from Arabidopsis thaliana (AT4G16340) UniProtKB/Swiss-Prot;Acc:Q8SAB7] && Q8SAB7.1 RecName: Full=Guanine nucleotide exchange factor SPIKE 1	Ded_cyto
Solyc02g080880.3	768.49	984.19	684.374	2225.78	3214.71	3000.07	812.351	2813.52	-1.79216	1.20362e-12	2.1495e-11	-	2	45530981	45536952	-	2388	protein_coding	- && O04057.1 RecName: Full=Aspartic proteinase; Flags: Precursor	Asp
Solyc01g110500.3	62.0452	86.3324	63.5923	387.79	347.485	523.791	70.6567	419.689	-2.56984	1.22107e-12	2.179e-11	-	1	97104099	97105230	+	795	protein_coding	- && Q8VY07.1 RecName: Full=Clathrin interactor EPSIN 1; AltName: Full=EPSIN-related 1	-
Solyc04g056320.2	2375.14	2584.89	2658.76	785.016	420.59	720.093	2539.6	641.9	1.98419	1.22878e-12	2.19108e-11	-	4	54006663	54013002	+	1570	protein_coding	- && Q9C8N5.1 RecName: Full=Protein SENSITIVE TO PROTON RHIZOTOXICITY 1; AltName: Full=Zinc finger protein STOP1	-
Solyc01g109070.2	1178.86	1008.57	890.292	277.397	217.416	316.956	1025.91	270.59	1.92265	1.23002e-12	2.1916e-11	-	1	96029801	96030416	+	616	protein_coding	- && Q6VUC1.1 RecName: Full=DPH3 homolog; AltName: Full=CSL-type zinc finger-containing protein 2; AltName: Full=Diphtheria toxin and Pseudomonas exotoxin A sensitivity-required protein 1	-
Solyc07g054790.1	2232.54	2036.43	2889.92	12.2659	1.89883	40.2179	2386.3	18.1275	7.04086	1.24043e-12	2.20845e-11	-	7	63112730	63113002	-	273	protein_coding	- && -	-
Solyc06g062420.3	197.021	112.74	173.617	2012.55	1427.92	618.59	161.126	1353.02	-3.07028	1.25064e-12	2.22494e-11	-	6	39489350	39490001	-	538	protein_coding	- && -	-
Solyc08g079200.1	0	0	0	108.506	306.66	101.502	0	172.223	-9.81805	1.28016e-12	2.27571e-11	-	8	62943958	62944365	-	408	protein_coding	- && P14009.1 RecName: Full=14 kDa proline-rich protein DC2.15; Flags: Precursor	-
Solyc10g079660.2	0	0	0	253.809	100.638	118.739	0	157.729	-9.69126	1.28673e-12	2.28564e-11	-	10	61280532	61290911	+	3093	protein_coding	- && Q9ZVB5.1 RecName: Full=Transcription factor bHLH100; AltName: Full=Basic helix-loop-helix protein 100; Short=AtbHLH100; Short=bHLH 100; AltName: Full=Transcription factor EN 7; AltName: Full=bHLH transcription factor bHLH100	HLH
Solyc12g099580.2	552.965	464.164	385.591	11.3223	52.2177	44.0482	467.573	35.8628	3.70493	1.35568e-12	2.40627e-11	-	12	67664949	67667578	+	1613	protein_coding	WAT1-related protein [Source:UniProtKB/TrEMBL;Acc:K4DHX9] && Q9LI65.1 RecName: Full=WAT1-related protein At3g30340	DUF6
Solyc11g012420.2	177.428	76.1757	124.156	758.597	1490.58	725.838	125.92	991.671	-2.97823	1.39351e-12	2.47154e-11	-	11	5262789	5265234	-	1466	protein_coding	Cytochrome b561 and DOMON domain-containing protein [Source:UniProtKB/TrEMBL;Acc:K4D646] && Q8VYH6.1 RecName: Full=Cytochrome b561 and DOMON domain-containing protein At4g17280; AltName: Full=Protein b561A.tha2; Flags: Precursor	Cytochrom_B561
Solyc03g031620.3	1184.3	1117.24	1283.96	377.411	356.03	445.27	1195.17	392.904	1.60502	1.40496e-12	2.48995e-11	-	3	4121749	4125007	-	2062	protein_coding	- && P92980.2 RecName: Full=5'-adenylylsulfate reductase 3, chloroplastic; AltName: Full=3'-phosphoadenosine-5'-phosphosulfate reductase homolog 26; Short=PAPS reductase homolog 26; Short=Prh-26; AltName: Full=Adenosine 5'-phosphosulfate 5'-adenylylsulfate sulfotransferase 3; Short=APS sulfotransferase 3; AltName: Full=Thioredoxin-independent APS reductase 3; Flags: Precursor	-
Solyc07g005710.3	1042.8	630.735	851.935	97.1835	168.046	180.981	841.822	148.737	2.50077	1.45725e-12	2.58065e-11	-	7	586541	588387	-	603	protein_coding	- && -	-
Solyc10g055810.2	57982.9	60922.3	57577.3	18614.9	18337	9680.08	58827.5	15544	1.92013	1.46213e-12	2.58733e-11	CHI9	10	57363714	57364923	-	1028	protein_coding	Basic 30 kDa endochitinase [Source:UniProtKB/Swiss-Prot;Acc:Q05538] && Q05538.1 RecName: Full=Basic 30 kDa endochitinase; Flags: Precursor	-
Solyc09g025220.2	0	0	0	130.207	136.716	127.357	0	131.426	-9.42802	1.47089e-12	2.60085e-11	-	9	65285763	65287573	-	1533	protein_coding	- && Q9XHP0.1 RecName: Full=11S globulin seed storage protein 2; AltName: Full=11S globulin seed storage protein II; AltName: Full=Alpha-globulin; Contains: RecName: Full=11S globulin seed storage protein 2 acidic chain; AltName: Full=11S globulin seed storage protein II acidic chain; Contains: RecName: Full=11S globulin seed storage protein 2 basic chain; AltName: Full=11S globulin seed storage …	-
Solyc01g080770.3	195.932	161.492	209.955	626.503	769.025	738.287	189.127	711.271	-1.91112	1.47242e-12	2.60158e-11	-	1	79850336	79854306	-	3855	protein_coding	Leucine-rich repeat receptor-like serine/threonine-protein kinase BAM3 [Source:Projected from Arabidopsis thaliana (AT4G20270) UniProtKB/Swiss-Prot;Acc:O65440] && O65440.3 RecName: Full=Leucine-rich repeat receptor-like serine/threonine-protein kinase BAM3; AltName: Full=Protein BARELY ANY MERISTEM 3; Flags: Precursor	Pkinase
Solyc09g011420.3	4607.68	5136.27	4715.92	880.312	1524.76	1557.97	4819.96	1321.01	1.86741	1.49891e-12	2.64637e-11	-	9	4751104	4754547	+	986	protein_coding	- && Q6P8E9.1 RecName: Full=NHP2-like protein 1; AltName: Full=High mobility group-like nuclear protein 2 homolog 1; AltName: Full=U4/U6.U5 small nuclear ribonucleoprotein SNU13; AltName: Full=U4/U6.U5 tri-snRNP 15.5 kDa protein	-
Solyc10g076840.2	1286.62	1132.48	1021.51	45.2894	33.2295	172.363	1146.87	83.6272	3.77788	1.50515e-12	2.65537e-11	-	10	59905330	59914005	-	1535	protein_coding	- && D4N502.1 RecName: Full=Codeine O-demethylase	2OG-FeII_Oxy
Solyc02g075615.1	3806.53	3673.7	4334.37	840.684	985.491	1465.08	3938.2	1097.09	1.8439	1.50689e-12	2.65641e-11	-	2	42342044	42342487	+	363	protein_coding	- && -	-
Solyc07g032170.3	155.657	230.558	186.739	1063.36	646.55	1053.33	190.985	921.078	-2.26942	1.51145e-12	2.66244e-11	-	7	36046628	36049844	+	936	protein_coding	- && O22975.1 RecName: Full=1-acylglycerol-3-phosphate O-acyltransferase; AltName: Full=Lipid droplet-binding protein CGI-58 homolog	Abhydrolase_1
Solyc08g079310.3	189.401	166.571	288.689	1790.82	775.671	1564.67	214.887	1377.05	-2.67971	1.52487e-12	2.68405e-11	-	8	63021822	63023886	+	1963	protein_coding	- && O64636.1 RecName: Full=Cytochrome P450 76C1	p450
Solyc07g062810.3	96.8777	39.6114	39.3667	913.336	711.111	357.174	58.6186	660.54	-3.49645	1.53068e-12	2.69224e-11	-	7	65599544	65603144	-	1813	protein_coding	- && Q8L493.1 RecName: Full=D-amino-acid transaminase, chloroplastic; AltName: Full=Aminodeoxychorismate lyase; Short=AtADCL; AltName: Full=Branched-chain-amino-acid aminotransferase-like protein 3; Flags: Precursor	-
Solyc06g008980.3	0	0	0	132.094	256.342	88.0965	0	158.844	-9.7014	1.53379e-12	2.69567e-11	-	6	2919158	2922804	+	1496	nontranslating_CDS	- && -	-
Solyc10g086680.1	1434.66	1744.93	1504.01	0	10.4435	0.95757	1561.2	3.80037	8.68226	1.54537e-12	2.71397e-11	-	10	65576479	65577183	-	705	protein_coding	- && P19243.1 RecName: Full=18.1 kDa class I heat shock protein; AltName: Full=HSP 18.1	-
Solyc10g054440.2	9655.11	10546.8	10072.8	2445.63	2781.78	1134.72	10091.6	2120.71	2.25052	1.54813e-12	2.71676e-11	-	10	55366325	55368444	-	2016	protein_coding	- && O23141.1 RecName: Full=Arginine decarboxylase 2; Short=ADC 2; Short=ARGDC 2; AltName: Full=ADC-N	-
Solyc08g063010.3	503.982	475.336	624.819	113.223	139.564	120.654	534.712	124.48	2.10294	1.59064e-12	2.78927e-11	-	8	52565782	52578338	-	2456	protein_coding	- && Q9FM86.1 RecName: Full=Probable ADP,ATP carrier protein At5g56450; AltName: Full=ADP/ATP translocase At5g56450; AltName: Full=Adenine nucleotide translocator At5g56450	Mito_carr
Solyc01g100270.3	95.7891	141.179	81.7615	716.138	466.162	620.505	106.243	600.935	-2.49957	1.60357e-12	2.80981e-11	-	1	90214008	90228738	+	2455	protein_coding	- && -	3_5_exonuc
Solyc05g052760.3	2276.08	2329.96	2313.55	6571.68	5404.06	8333.73	2306.53	6769.82	-1.55338	1.61132e-12	2.82127e-11	-	5	63804571	63810291	+	2770	protein_coding	Phosphoinositide phospholipase C [Source:UniProtKB/TrEMBL;Acc:K4C1V6] && Q39033.1 RecName: Full=Phosphoinositide phospholipase C 2; AltName: Full=Phosphoinositide phospholipase PLC2; Short=AtPLC2; Short=PI-PLC2	PI-PLC-X
Solyc06g007370.1	14.1507	25.3919	39.3667	313.252	687.375	232.69	26.3031	411.105	-3.96349	1.61859e-12	2.83187e-11	-	6	1405290	1405769	+	480	protein_coding	- && -	-
Solyc02g092250.3	7.61959	42.6584	38.3573	618.955	339.89	447.185	29.5451	468.677	-3.98394	1.69374e-12	2.96111e-11	-	2	54030566	54032863	-	1960	protein_coding	- && A6YIH8.1 RecName: Full=Premnaspirodiene oxygenase; Short=HPO; AltName: Full=Cytochrome P450 71D55	p450
Solyc02g070440.3	1068.92	1096.93	893.32	3217.43	4128.05	2643.85	1019.72	3329.78	-1.7073	1.70679e-12	2.98169e-11	-	2	40742363	40749637	+	1590	protein_coding	- && A0JMA9.1 RecName: Full=Katanin p60 ATPase-containing subunit A-like 2; Short=Katanin p60 subunit A-like 2; AltName: Full=p60 katanin-like 2	AAA
Solyc10g007310.1	1592.49	1731.73	2148.01	112.28	101.587	363.877	1824.08	192.581	3.2438	1.72012e-12	3.00273e-11	-	10	1708142	1708783	+	642	protein_coding	- && Q9S7R3.1 RecName: Full=Protein LIGHT-DEPENDENT SHORT HYPOCOTYLS 10; AltName: Full=Protein ORGAN BOUNDARY 10	-
Solyc02g092310.3	164.365	159.461	132.232	883.143	511.734	919.267	152.019	771.381	-2.34344	1.76593e-12	3.08038e-11	-	2	54056906	54062683	-	3140	protein_coding	Pentatricopeptide repeat-containing protein At5g67570, chloroplastic [Source:Projected from Arabidopsis thaliana (AT5G67570) UniProtKB/Swiss-Prot;Acc:Q9FJW6] && Q9FJW6.2 RecName: Full=Pentatricopeptide repeat-containing protein At5g67570, chloroplastic; AltName: Full=Protein DELAYED GREENING 1; AltName: Full=Protein EMBRYO DEFECTIVE 1408; Flags: Precursor	-
Solyc01g102380.3	2612.43	2728.1	2642.61	18181.8	11925.6	7221.04	2661.05	12442.8	-2.22524	1.80222e-12	3.14133e-11	-	1	91089719	91101064	+	1822	protein_coding	- && Q94EG3.1 RecName: Full=Nectarin-1; AltName: Full=Superoxide dismutase [Mn]; Flags: Precursor	-
Solyc08g076640.1	0	0	0	151.908	246.847	77.5632	0	158.773	-9.70076	1.84668e-12	3.2164e-11	-	8	60691436	60692749	+	1314	protein_coding	- && Q9LZL3.1 RecName: Full=Aspartic proteinase PCS1; AltName: Full=Aspartic protease 38; Short=AtASP38; AltName: Full=Protein EMBRYO DEFECTIVE 24; AltName: Full=Protein PROMOTION OF CELL SURVIVAL 1; Flags: Precursor	-
Solyc08g006740.3	5996.62	6073.74	7117.29	2339.95	1267.47	1402.84	6395.88	1670.09	1.93721	1.86529e-12	3.24639e-11	-	8	1295697	1298383	-	1753	protein_coding	Aromatic amino acid decarboxylase 2 [Source:UniProtKB/TrEMBL;Acc:Q1KSC4] && P54772.1 RecName: Full=Histidine decarboxylase; Short=HDC; AltName: Full=TOM92	-
Solyc02g088830.3	0	0	0	106.619	303.812	95.757	0	168.729	-9.78848	1.87414e-12	3.25935e-11	-	2	51427480	51428202	+	613	protein_coding	- && -	-
Solyc07g006170.3	17.4162	9.14108	12.1128	292.494	180.389	140.763	12.89	204.548	-3.99175	1.88976e-12	3.28406e-11	-	7	1005458	1007140	+	1393	protein_coding	- && Q5IGR8.1 RecName: Full=Exostosin-1a; AltName: Full=Glucuronosyl-N-acetylglucosaminyl-proteoglycan/N-acetylglucosaminyl-proteoglycan 4-alpha-N-acetylglucosaminyltransferase 1a; AltName: Full=Multiple exostoses protein 1 homolog a	-
Solyc11g069590.2	286.279	181.806	248.313	3489.17	1391.84	1069.61	238.799	1983.54	-3.05443	1.89301e-12	3.28725e-11	-	11	54516295	54521086	-	2753	protein_coding	NCRK [Source:Projected from Arabidopsis thaliana (AT2G28250) UniProtKB/TrEMBL;Acc:A0A178VW29] && Q8VYY5.1 RecName: Full=Receptor-like serine/threonine-protein kinase NCRK; Flags: Precursor	Pkinase
Solyc04g077050.3	1103.75	906.998	1380.86	94.3529	225.011	66.0723	1130.54	128.479	3.13735	1.89621e-12	3.29034e-11	-	4	62102741	62107293	+	1814	protein_coding	- && P92934.1 RecName: Full=Amino acid permease 6; AltName: Full=Amino acid transporter AAP6	Aa_trans
Solyc07g043670.1	0	0	0	110.393	279.128	95.757	0	161.759	-9.72762	1.90794e-12	3.30823e-11	-	7	57763292	57764587	-	1296	protein_coding	- && K4D9Y4.1 RecName: Full=Acylsugar acyltransferase 3; Short=Sl-ASAT3	-
Solyc01g094700.3	13.0622	4.0627	0	282.115	185.136	271.95	5.70829	246.4	-5.44811	1.92414e-12	3.33383e-11	-	1	86019978	86022925	+	1718	protein_coding	- && Q9LMM0.1 RecName: Full=Glycerol-3-phosphate 2-O-acyltransferase 4; Short=AtGPAT4; AltName: Full=Glycerol-3-phosphate acyltransferase 4	Acyltransferase
Solyc04g076280.3	71.8419	147.273	108.006	504.788	716.807	744.032	109.04	655.209	-2.586	1.95265e-12	3.38072e-11	-	4	61288808	61295172	+	1268	protein_coding	- && O82794.1 RecName: Full=MADS-box protein AGL24; AltName: Full=Protein AGAMOUS-LIKE 24	SRF-TF
Solyc02g077770.3	193.755	205.166	165.542	611.407	715.858	815.85	188.155	714.371	-1.92486	2.05078e-12	3.54797e-11	-	2	43192399	43193195	+	593	protein_coding	- && -	-
Solyc02g069630.3	156.746	235.637	240.238	936.924	1276.96	773.717	210.873	995.867	-2.23899	2.1113e-12	3.64996e-11	-	2	40033045	40040991	+	3534	protein_coding	- && Q9SUN6.1 RecName: Full=Subtilisin-like protease SBT2.2; AltName: Full=Subtilase subfamily 2 member 2; Short=AtSBT2.2; Flags: Precursor	Peptidase_S8
Solyc01g088400.3	0	0	0	99.0705	315.205	98.6297	0	170.968	-9.8075	2.11866e-12	3.65995e-11	-	1	83075330	83090285	+	2665	protein_coding	- && F4HVY0.1 RecName: Full=Protein ECERIFERUM 1	-
Solyc03g113120.3	82.727	70.0816	74.6957	537.811	310.458	648.275	75.8348	498.848	-2.71802	2.17724e-12	3.75836e-11	-	3	64872973	64877322	-	1765	protein_coding	- && Q9LXG8.1 RecName: Full=Probable WRKY transcription factor 72; AltName: Full=WRKY DNA-binding protein 72	WRKY
Solyc04g009790.3	28.3013	13.2038	43.4043	523.658	416.792	223.114	28.3031	387.855	-3.77626	2.18805e-12	3.77422e-11	-	4	3089330	3094277	-	2961	protein_coding	- && Q9FHB6.1 RecName: Full=Protein DETOXIFICATION 16; Short=AtDTX16; AltName: Full=Multidrug and toxic compound extrusion protein 16; Short=MATE protein 16	MatE
Solyc09g075480.3	66.3993	44.6897	58.5453	333.066	383.563	296.847	56.5448	337.825	-2.57983	2.24196e-12	3.86436e-11	-	9	67600538	67608061	-	3897	protein_coding	- && F4IL57.1 RecName: Full=Kinesin-like protein KIN-14I	-
Solyc06g074170.3	188.313	199.072	239.228	20.7576	28.4824	19.1514	208.871	22.7971	3.19573	2.25231e-12	3.87931e-11	-	6	46005967	46010518	-	2340	protein_coding	- && Q9XIN7.1 RecName: Full=NAC domain-containing protein 40; Short=ANAC040; AltName: Full=Protein NTM1-like 8	NAM
Solyc01g094080.3	108.851	191.963	134.25	4.71764	2.84824	0	145.021	2.52196	5.84207	2.27138e-12	3.90926e-11	-	1	85533906	85537783	-	2132	protein_coding	- && Q50EK3.1 RecName: Full=Cytochrome P450 704C1; AltName: Full=Cytochrome P450 CYPD [Pinus taeda]	p450
Solyc01g101050.3	28.3013	19.2978	11.1034	447.233	251.595	180.023	19.5675	292.95	-3.90765	2.27466e-12	3.912e-11	-	1	90786801	90789593	+	2675	protein_coding	Peroxidase [Source:UniProtKB/TrEMBL;Acc:K4B1D5] && A7QEU4.2 RecName: Full=Peroxidase 5; Flags: Precursor	-
Solyc09g031920.1	527.929	450.96	594.537	40.5717	100.638	79.4783	524.475	73.5626	2.83401	2.33399e-12	4.01109e-11	-	9	27808873	27809475	+	603	protein_coding	- && -	-
Solyc08g014570.3	1089.6	969.97	874.142	326.461	227.859	256.629	977.904	270.316	1.8549	2.38575e-12	4.097e-11	-	8	4791997	4795558	+	2631	protein_coding	- && Q6AWW5.1 RecName: Full=Ankyrin repeat-containing protein At5g02620	-
Solyc06g083590.3	0	0	0	134.925	89.2448	198.217	0	140.795	-9.52733	2.39539e-12	4.11052e-11	-	6	48991810	48998499	-	3688	protein_coding	- && Q9M8Z8.1 RecName: Full=Probable pectate lyase 8; Flags: Precursor	-
Solyc09g009650.3	3326.5	3178.05	3021.14	936.924	1115.56	1327.19	3175.23	1126.56	1.49495	2.39716e-12	4.11053e-11	-	9	3059225	3059926	-	605	protein_coding	- && -	-
Solyc09g010230.2	82.727	79.2227	61.5735	762.371	515.531	330.362	74.5077	536.088	-2.84752	2.40112e-12	4.11429e-11	-	9	3624707	3629129	+	1742	protein_coding	- && Q9FNI3.1 RecName: Full=B3 domain-containing protein At5g06250	B3
Solyc08g067700.1	0	0	0	294.381	128.171	77.5632	0	166.705	-9.77112	2.44005e-12	4.1779e-11	-	8	56752767	56753516	+	750	protein_coding	- && -	-
Solyc07g008107.1	667.258	528.151	589.49	114.167	159.501	94.7994	594.967	122.823	2.27606	2.44591e-12	4.18486e-11	-	7	2836250	2837956	+	470	protein_coding	- && Q9SK27.2 RecName: Full=Early nodulin-like protein 1; AltName: Full=Phytocyanin-like protein; Flags: Precursor	Cu_bind_like
Solyc01g080100.3	30.4784	81.2541	27.2538	364.202	664.589	523.791	46.3288	517.527	-3.48042	2.63945e-12	4.51269e-11	-	1	79112814	79113394	-	581	protein_coding	- && -	-
Solyc08g083280.3	2307.65	2319.8	2499.28	886.917	683.578	527.621	2375.58	699.372	1.7641	2.68107e-12	4.58048e-11	-	8	65904475	65906877	+	1408	protein_coding	- && A1L4Y2.1 RecName: Full=Alcohol dehydrogenase-like 3	ADH_N
Solyc04g005640.3	0	0	0	128.32	284.824	76.6056	0	163.25	-9.74087	2.78481e-12	4.75421e-11	-	4	417340	419197	+	723	protein_coding	- && P80196.2 RecName: Full=Intracellular ribonuclease LX; Short=RNase LX; Flags: Precursor	Ribonuclease_T2
Solyc11g008420.2	396.219	428.615	390.638	94.3529	56.9648	75.648	405.157	75.6552	2.42089	2.81508e-12	4.80237e-11	-	11	2606748	2611631	-	734	protein_coding	- && Q9LNT9.1 RecName: Full=SKP1-like protein 4; Short=AtSK4	Skp1
Solyc08g080745.1	0	0	0	156.626	109.183	118.739	0	128.182	-9.39199	2.8397e-12	4.84081e-11	-	8	64069805	64073763	+	3131	protein_coding	- && -	-
Solyc10g011815.1	39.1865	27.4232	26.2444	512.336	421.539	172.363	30.9514	368.746	-3.57614	2.86088e-12	4.87334e-11	-	10	4030512	4031199	-	425	protein_coding	- && Q9FR82.1 RecName: Full=Delta(8)-fatty-acid desaturase; AltName: Full=Delta(8)-sphingolipid desaturase; AltName: Full=Sphingolipid 8-(E/Z)-desaturase	-
Solyc05g051800.3	401.661	278.295	350.262	1700.24	1121.26	1214.2	343.406	1345.23	-1.97017	2.92413e-12	4.97745e-11	-	5	63027316	63031035	+	1314	protein_coding	- && O60103.1 RecName: Full=ERAD-associated E3 ubiquitin-protein ligase doa10	-
Solyc11g019910.1	1628.42	2020.18	2060.19	106.619	371.221	94.7994	1902.93	190.88	3.31748	2.93818e-12	4.9977e-11	-	11	9775303	9775893	-	591	protein_coding	- && -	-
Solyc03g044790.3	626.984	531.198	689.421	83.9741	18.0389	63.1996	615.868	55.0708	3.48317	2.94196e-12	5.00047e-11	-	3	10550001	10552291	-	1001	protein_coding	Methylesterase [Source:UniProtKB/TrEMBL;Acc:Q6ED34] && Q6RYA0.1 RecName: Full=Salicylic acid-binding protein 2; Short=NtSABP2; AltName: Full=Methyl salicylate esterase	-
Solyc11g006750.1	286.279	358.534	402.751	51.8941	32.2801	62.2421	349.188	48.8054	2.83921	3.17558e-12	5.39361e-11	-	11	1349173	1349737	-	261	protein_coding	- && -	-
Solyc11g009080.2	4014.44	4236.38	4174.88	11683.7	8818.15	12424.5	4141.9	10975.4	-1.4059	3.19113e-12	5.41607e-11	-	11	3200322	3204136	+	2051	protein_coding	Phospho-2-dehydro-3-deoxyheptonate aldolase [Source:UniProtKB/TrEMBL;Acc:K4D5G8] && P37215.1 RecName: Full=Phospho-2-dehydro-3-deoxyheptonate aldolase 1, chloroplastic; AltName: Full=3-deoxy-D-arabino-heptulosonate 7-phosphate synthase 1; AltName: Full=DAHP synthase 1; AltName: Full=Phospho-2-keto-3-deoxyheptonate aldolase 1; Flags: Precursor	-
Solyc10g018150.2	0	0	0	320.8	191.781	49.7936	0	187.458	-9.94039	3.19774e-12	5.42332e-11	-	10	6756584	6758505	-	1630	protein_coding	- && Q42798.1 RecName: Full=3,9-dihydroxypterocarpan 6A-monooxygenase; AltName: Full=Cytochrome P450 93A1; AltName: Full=Dihydroxypterocarpan 6a-hydroxylase; Short=D6aH	p450
Solyc10g085380.2	0	0	0	106.619	332.295	81.3935	0	173.436	-9.82817	3.27426e-12	5.54905e-11	-	10	64709050	64710579	+	1123	protein_coding	- && Q9SCU0.1 RecName: Full=Short-chain dehydrogenase reductase 2a; Short=AtSDR2a	adh_short
Solyc02g090920.2	0	0	0	96.2399	274.38	98.6297	0	156.417	-9.67916	3.27915e-12	5.5533e-11	-	2	53032944	53035197	-	1463	protein_coding	- && P19515.2 RecName: Full=Lipase; AltName: Full=Triacylglycerol lipase; Flags: Precursor	Lipase_3
Solyc06g064960.3	0	0	0	175.496	171.844	75.648	0	140.996	-9.52947	3.38697e-12	5.73172e-11	-	6	40624595	40626104	+	1134	protein_coding	- && Q9SSA7.2 RecName: Full=GDSL esterase/lipase 5; AltName: Full=Extracellular lipase 5; Flags: Precursor	Lipase_GDSL
Solyc03g059110.1	0	3.04703	0	283.059	95.8907	183.853	1.01568	187.601	-7.5067	3.39862e-12	5.74725e-11	-	3	29894243	29894416	-	174	protein_coding	- && -	-
Solyc07g066660.3	176.339	220.402	192.796	619.898	750.036	746.905	196.512	705.613	-1.8439	3.49326e-12	5.90299e-11	-	7	68152866	68166136	+	2486	protein_coding	CYCB3 [Source:Projected from Arabidopsis thaliana (AT1G16330) UniProtKB/TrEMBL;Acc:A0A178W969] && Q9SA32.2 RecName: Full=Putative cyclin-B3-1; AltName: Full=G2/mitotic-specific cyclin-B3-1; Short=CycB3;1	Cyclin_C
Solyc01g109900.3	5232.48	4334.9	5711.19	13626.4	24485.4	35102.6	5092.86	24404.8	-2.26062	3.56686e-12	6.02299e-11	-	1	96658163	96659737	+	674	protein_coding	Protein CASPARIAN STRIP INTEGRITY FACTOR 1 [Source:Projected from Arabidopsis thaliana (AT2G16385) UniProtKB/Swiss-Prot;Acc:Q84MD2] && -	-
Solyc03g059080.2	0	0	0	99.0705	222.163	103.418	0	141.55	-9.53508	3.60806e-12	6.08815e-11	-	3	29811197	29813306	+	1355	protein_coding	- && P93749.1 RecName: Full=Probable protein kinase At2g41970	Pkinase_Tyr
Solyc06g007570.3	3343.91	3624.95	3609.62	890.691	1388.04	1205.58	3526.16	1161.44	1.60222	3.71389e-12	6.25908e-11	-	6	1569321	1572319	+	1173	protein_coding	40S ribosomal protein S8 [Source:UniProtKB/TrEMBL;Acc:K4C3D8] && P49199.2 RecName: Full=40S ribosomal protein S8	-
novel.256	454.998	568.778	383.573	96.2399	51.2683	80.4359	469.116	75.9814	2.62617	3.71475e-12	6.25908e-11	-	11	16284640	16292173	-	1252	-	- && - && -	-
Solyc10g008210.3	0	0	0	116.054	334.193	72.7753	0	174.341	-9.83569	3.7341e-12	6.28713e-11	-	10	2314292	2322456	+	4197	protein_coding	- && F4I2H7.1 RecName: Full=Protein TPX2; Short=AtTPX2; AltName: Full=Targeting protein for XKLP2	-
Solyc08g068190.3	0	0	0	91.5223	282.925	98.6297	0	157.692	-9.69088	3.88266e-12	6.53253e-11	-	8	57366727	57369585	+	1702	protein_coding	- && Q8S528.2 RecName: Full=Aldehyde dehydrogenase family 2 member B7, mitochondrial; Short=ALDH2b; Flags: Precursor	Aldedh
Solyc06g060530.1	0	0	0	119.828	116.778	129.272	0	121.959	-9.32016	3.92923e-12	6.60611e-11	-	6	38667424	38668887	+	1464	protein_coding	Protein DETOXIFICATION [Source:UniProtKB/TrEMBL;Acc:K4C6N3] && O49660.1 RecName: Full=Protein DETOXIFICATION 56; Short=AtDTX56; AltName: Full=Multidrug and toxic compound extrusion protein 56; Short=MATE protein 56; AltName: Full=Protein RESISTANT TO HIGH CARBON DIOXIDE 1	MatE
Solyc12g014140.2	0	0	0	305.703	101.587	85.2237	0	164.171	-9.74903	3.9784e-12	6.68394e-11	-	12	4949918	4952062	-	1741	protein_coding	- && Q9MAH8.1 RecName: Full=Transcription factor TCP3	TCP
Solyc04g050440.3	311.315	340.251	265.473	4646.88	1495.33	1422.95	305.68	2521.72	-3.04435	3.997e-12	6.71034e-11	-	4	47168376	47171279	-	1797	nontranslating_CDS	- && O04161.1 RecName: Full=Ammonium transporter 1 member 2; AltName: Full=LeAMT1;2	Ammonium_transp
Solyc05g054640.3	7293.04	7698.82	7906.64	3671.27	3195.73	3091.04	7632.83	3319.34	1.20132	4.08352e-12	6.85066e-11	-	5	65356981	65364226	+	3698	protein_coding	- && Q54JE4.1 RecName: Full=2-oxoglutarate dehydrogenase, mitochondrial; AltName: Full=2-oxoglutarate dehydrogenase complex component E1; Short=OGDC-E1; AltName: Full=Alpha-ketoglutarate dehydrogenase; Flags: Precursor	-
Solyc01g087425.1	0	0	0	378.355	81.6495	92.8843	0	184.296	-9.91584	4.23505e-12	7.09974e-11	-	1	82262405	82265324	+	282	protein_coding	- && -	-
Solyc01g106080.3	1527.18	1531.64	1746.26	3978.86	3553.65	4216.18	1601.7	3916.23	-1.28982	4.33066e-12	7.2548e-11	-	1	93958890	93964952	-	2456	protein_coding	Methylmalonate-semialdehyde dehydrogenase [acylating], mitochondrial [Source:Projected from Arabidopsis thaliana (AT2G14170) UniProtKB/Swiss-Prot;Acc:Q0WM29] && Q0WM29.2 RecName: Full=Methylmalonate-semialdehyde dehydrogenase [acylating], mitochondrial; Short=MM-ALDH; Short=MMSDH; Short=Malonate-semialdehyde dehydrogenase [acylating]; AltName: Full=Aldehyde dehydrogenase family 6 member B2; Flags…	Aldedh
Solyc02g069420.3	0	0	0	120.772	174.692	92.8843	0	129.449	-9.40617	4.37616e-12	7.32574e-11	-	2	39887918	39890149	+	2109	protein_coding	- && Q9SGG3.1 RecName: Full=Probable phospholipid-transporting ATPase 5; Short=AtALA5; AltName: Full=Aminophospholipid flippase 5	-
Solyc07g043480.1	20.6817	13.2038	28.2632	144.36	906.69	352.386	20.7163	467.812	-4.49691	4.44009e-12	7.42741e-11	-	7	57396905	57398275	+	1371	protein_coding	- && P56725.1 RecName: Full=Zeatin O-xylosyltransferase; AltName: Full=Zeatin O-beta-D-xylosyltransferase	UDPGT
Solyc09g066310.3	0	4.0627	23.2162	520.828	274.38	528.579	9.09298	441.262	-5.59254	4.49475e-12	7.51344e-11	-	9	64980335	64986498	-	1485	protein_coding	- && Q9FLV0.1 RecName: Full=Protein DOWNY MILDEW RESISTANCE 6; Short=AtDMR6; AltName: Full=2-oxoglutarate (2OG)-Fe(II) oxygenase-like protein DMR6; AltName: Full=Salicylate 3-hydroxylase DMR6; Short=S3H DMR6; Short=SA 3-hydroxylase DMR6; Short=Salicylic acid 3-hydroxylase DMR6	2OG-FeII_Oxy
Solyc05g005750.3	2096.48	2208.08	2285.28	12367.8	6737.04	6532.54	2196.61	8545.78	-1.95992	4.50003e-12	7.51686e-11	-	5	570977	578156	+	3304	protein_coding	- && Q9LRA7.1 RecName: Full=Probable alpha,alpha-trehalose-phosphate synthase [UDP-forming] 9; AltName: Full=Trehalose-6-phosphate synthase 9; Short=AtTPS9	-
Solyc07g008550.3	216.614	113.756	240.238	1413.41	778.519	1198.88	190.202	1130.27	-2.57127	4.5247e-12	7.55264e-11	-	7	3489012	3498110	+	2258	protein_coding	Purple acid phosphatase [Source:UniProtKB/TrEMBL;Acc:K4CBX4] && Q5MAU8.1 RecName: Full=Probable inactive purple acid phosphatase 27; Flags: Precursor	Metallophos
Solyc11g066890.1	3639.99	3678.78	3859.95	1184.13	896.246	522.833	3726.24	867.736	2.10235	4.54843e-12	7.58681e-11	-	11	52983441	52984724	-	1284	protein_coding	Arogenate dehydratase [Source:UniProtKB/TrEMBL;Acc:K4D9U6] && Q9SGD6.1 RecName: Full=Arogenate dehydratase/prephenate dehydratase 6, chloroplastic; Short=AtADT6; Short=AtPDT6; Flags: Precursor	-
Solyc10g085030.1	387.511	295.562	485.522	37.7411	73.1048	45.9634	389.531	52.2698	2.89775	4.56874e-12	7.61522e-11	-	10	64482904	64483503	+	600	protein_coding	- && -	-
Solyc02g032930.3	4786.19	4939.23	5040.95	1993.68	2339.35	1967.81	4922.12	2100.28	1.22871	4.62738e-12	7.7045e-11	-	2	29943395	29962910	+	6894	protein_coding	- && O04057.1 RecName: Full=Aspartic proteinase; Flags: Precursor	-
Solyc05g012780.3	246.004	199.072	238.219	1020.9	972.199	677.96	227.765	890.352	-1.96705	4.62966e-12	7.7045e-11	-	5	5938547	5942872	-	1980	protein_coding	- && -	-
Solyc03g118480.3	13.0622	28.4389	0	501.014	530.722	435.694	13.8337	489.143	-5.14418	4.63224e-12	7.7045e-11	-	3	68820170	68822968	+	1333	protein_coding	- && -	-
Solyc02g087840.3	0	0	0	101.901	367.423	73.7329	0	181.019	-9.88991	4.7894e-12	7.9602e-11	-	2	50733480	50737235	-	2343	protein_coding	- && Q8LC03.2 RecName: Full=Homeobox-leucine zipper protein ATHB-13; AltName: Full=HD-ZIP protein ATHB-13; AltName: Full=Homeodomain transcription factor ATHB-13	Homeobox
Solyc12g098170.1	0	0	0	197.198	230.707	54.5815	0	160.829	-9.71933	4.96868e-12	8.25118e-11	-	12	66787415	66788332	+	918	protein_coding	- && Q9LIR8.1 RecName: Full=F-box/kelch-repeat protein At3g23880	-
Solyc01g104710.3	23.9473	39.6114	33.3102	438.741	277.229	208.75	32.2896	308.24	-3.25335	4.97157e-12	8.25118e-11	-	1	93010748	93011257	-	225	protein_coding	- && -	-
Solyc03g123790.3	501.805	586.045	535.992	1481.34	1561.78	1356.88	541.28	1466.67	-1.43795	5.02499e-12	8.33388e-11	-	3	72019879	72025582	-	1974	protein_coding	- && Q5KQN0.2 RecName: Full=Vacuolar cation/proton exchanger 2; AltName: Full=Ca(2+)/H(+) exchanger 2; AltName: Full=OsCAX2	Na_Ca_ex
Solyc09g008840.3	1986.54	2317.77	2443.76	98.127	447.174	254.714	2249.36	266.671	3.07643	5.14525e-12	8.52726e-11	-	9	2258817	2266168	-	2066	protein_coding	Pyruvate kinase [Source:UniProtKB/TrEMBL;Acc:K4CQR9] && Q2RAK2.1 RecName: Full=Pyruvate kinase 1, cytosolic; Short=OsPK1 >B8BJ39.1 RecName: Full=Pyruvate kinase 1, cytosolic; Short=OsPK1	PK
Solyc03g031760.3	15.2392	25.3919	27.2538	594.423	132.918	428.034	22.6283	385.125	-4.08721	5.17365e-12	8.56821e-11	-	3	4255981	4259591	-	2166	protein_coding	- && Q93V99.1 RecName: Full=Homeobox-leucine zipper protein PROTODERMAL FACTOR 2; AltName: Full=HD-ZIP protein PDF2; AltName: Full=Homeodomain transcription factor PDF2	START
Solyc11g069290.2	833.801	819.65	1172.92	177.383	124.373	248.968	942.125	183.575	2.3597	5.19919e-12	8.60438e-11	-	11	54206264	54212648	-	1597	protein_coding	PDX2 [Source:Projected from Arabidopsis thaliana (AT5G60540) UniProtKB/TrEMBL;Acc:A0A178UA48] && Q8LAD0.1 RecName: Full=Probable pyridoxal 5'-phosphate synthase subunit PDX2; Short=AtPDX2; AltName: Full=Protein EMBRYO DEFECTIVE 2407; AltName: Full=Pyridoxal 5'-phosphate synthase glutaminase subunit	-
Solyc10g079950.2	3815.24	3718.39	3304.78	1551.16	1144.04	1330.06	3612.8	1341.76	1.42896	5.29805e-12	8.76176e-11	-	10	61506608	61515003	-	2712	protein_coding	- && P56725.1 RecName: Full=Zeatin O-xylosyltransferase; AltName: Full=Zeatin O-beta-D-xylosyltransferase	UDPGT
Solyc12g098100.2	0	0	0	172.666	106.334	100.545	0	126.515	-9.37312	5.41318e-12	8.9458e-11	-	12	66724320	66735003	+	4480	protein_coding	- && P22928.2 RecName: Full=Chalcone synthase J; AltName: Full=Naringenin-chalcone synthase J	Chal_sti_synt_N
Solyc01g087500.3	57.6912	113.756	33.3102	600.084	1827.62	544.857	68.2524	990.854	-3.85948	5.42203e-12	8.95406e-11	-	1	82315373	82327626	-	10104	protein_coding	DNA topoisomerase 2 [Source:UniProtKB/TrEMBL;Acc:K4AYE0] && P30182.2 RecName: Full=DNA topoisomerase 2; AltName: Full=DNA topoisomerase II	-
Solyc04g016080.2	0	0	0	89.6352	365.524	81.3935	0	178.851	-9.87253	5.43365e-12	8.96688e-11	-	4	6780262	6791904	+	5271	protein_coding	- && F4J2M6.2 RecName: Full=Kinesin-like protein KIN-14L	Kinesin
Solyc03g123410.1	0	0	0	147.19	179.439	75.648	0	134.093	-9.45703	5.46393e-12	9.01045e-11	-	3	71770205	71770831	-	627	protein_coding	- && Q9ZRA4.1 RecName: Full=Auxin-binding protein ABP19a; Flags: Precursor	-
Solyc02g080950.2	2456.77	2711.85	2694.09	795.395	1000.68	1075.35	2620.91	957.143	1.45332	5.51823e-12	9.09355e-11	-	2	45583054	45590043	+	3012	protein_coding	Pentatricopeptide repeat-containing protein At4g04370 [Source:Projected from Arabidopsis thaliana (AT4G04370) UniProtKB/Swiss-Prot;Acc:Q9XE98] && Q9XE98.1 RecName: Full=Pentatricopeptide repeat-containing protein At4g04370	Ala_racemase_N
Solyc12g042930.2	0	0	0	96.2399	180.389	108.205	0	128.278	-9.39303	5.52705e-12	9.10163e-11	-	12	59310219	59313621	-	1559	protein_coding	- && -	-
Solyc09g075730.3	151.303	107.662	146.363	1488.89	733.896	582.203	135.109	934.996	-2.7911	5.54633e-12	9.12692e-11	-	9	67774718	67779524	+	2228	protein_coding	- && C0LGI2.1 RecName: Full=Probable LRR receptor-like serine/threonine-protein kinase At1g67720; Flags: Precursor	-
Solyc03g078100.3	274.305	309.781	335.121	20.7576	49.3695	19.1514	306.403	29.7595	3.36399	5.56617e-12	9.15308e-11	-	3	51479997	51482211	-	2107	protein_coding	Pectinesterase [Source:UniProtKB/TrEMBL;Acc:K4BHP0] && Q9LXD9.1 RecName: Full=Probable pectinesterase/pectinesterase inhibitor 51; Includes: RecName: Full=Pectinesterase inhibitor 51; AltName: Full=Pectin methylesterase inhibitor 51; Includes: RecName: Full=Pectinesterase 51; Short=PE 51; AltName: Full=Pectin methylesterase 51; Short=AtPME51; Flags: Precursor	-
Solyc01g091700.3	653.108	507.838	601.603	1683.26	1562.73	2015.69	587.516	1753.89	-1.57802	5.65781e-12	9.29721e-11	-	1	85173585	85175504	+	1807	protein_coding	- && Q9LEX0.1 RecName: Full=F-box protein PP2-A13; AltName: Full=Protein PHLOEM PROTEIN 2-LIKE A13; Short=AtPP2-A13; AltName: Full=SKP1-interacting partner 9	-
Solyc03g005690.3	1476.02	1732.74	1549.43	282.115	527.874	398.349	1586.07	402.779	1.97745	5.67154e-12	9.31318e-11	-	3	492530	500902	+	2458	protein_coding	- && Q6NM73.1 RecName: Full=Cysteine-rich repeat secretory protein 3; AltName: Full=Plasmodesmata-located protein 2; Short=PDLP2; Flags: Precursor	-
Solyc03g113010.2	1191.92	962.861	1067.95	2588.1	2767.54	3176.26	1074.24	2843.97	-1.40469	5.72177e-12	9.38903e-11	-	3	64797743	64799830	-	1599	protein_coding	- && Q9CA63.1 RecName: Full=F-box/kelch-repeat protein At1g74510	Kelch_1
Solyc04g071440.3	666.17	617.531	664.186	5237.53	1933.95	3037.41	649.296	3402.97	-2.38987	5.8054e-12	9.51955e-11	-	4	58506204	58510657	+	2031	protein_coding	Tubby-like F-box protein [Source:UniProtKB/TrEMBL;Acc:K4BTD6] && Q75HX5.1 RecName: Full=Tubby-like F-box protein 8; Short=OsTLP8; AltName: Full=Tubby-like F-box protein 1; Short=OsTLP1	Tub
novel.789	0	0	0	137.755	212.669	71.8178	0	140.747	-9.5269	5.83146e-12	9.55554e-11	-	7	67639818	67641561	+	703	-	- && F4JDJ0.1 RecName: Full=Heavy metal-associated isoprenylated plant protein 47; Short=AtHIP47; Flags: Precursor && -	-
Solyc06g065570.3	5125.81	5199.24	4959.19	1858.75	2245.36	1557.97	5094.75	1887.36	1.43263	5.89153e-12	9.64717e-11	-	6	41078069	41092840	-	3270	protein_coding	- && Q9LK34.1 RecName: Full=Uridine kinase-like protein 2, chloroplastic; Includes: RecName: Full=Uridine kinase; Short=UK; Includes: RecName: Full=Putative uracil phosphoribosyltransferase; Short=UPRTase; AltName: Full=UMP pyrophosphorylase; Flags: Precursor	Acetyltransf_1
Solyc08g062210.3	2420.85	2268	2256.01	5470.58	7397.83	5536.67	2314.96	6135.03	-1.40611	5.98444e-12	9.78784e-11	-	8	50816625	50828549	+	2819	protein_coding	- && O22822.1 RecName: Full=UDP-glycosyltransferase 74F2; AltName: Full=AtSGT1; AltName: Full=Salicylic acid glucosyltransferase 1	-
Solyc04g079410.3	1745.97	1928.77	2095.52	522.715	511.734	747.862	1923.42	594.104	1.69498	5.98585e-12	9.78784e-11	-	4	64005153	64008773	+	1443	protein_coding	- && -	-
Solyc12g096680.1	482.211	334.157	497.635	56.6117	30.3812	77.5632	438.001	54.852	2.99745	6.0177e-12	9.833e-11	-	12	66489149	66491113	-	1965	protein_coding	- && Q9SI53.1 RecName: Full=Pentatricopeptide repeat-containing protein At2g03880, mitochondrial; Flags: Precursor	PPR
Solyc04g081730.3	7631.56	7240.75	7506.92	2645.65	2911.85	3502.79	7459.74	3020.1	1.30454	6.0761e-12	9.92145e-11	-	4	65747838	65752734	-	3513	protein_coding	- && -	-
Solyc03g117580.3	64.2223	96.4892	96.9025	581.214	377.866	942.249	85.8713	633.776	-2.88289	6.12019e-12	9.98643e-11	-	3	68178894	68187682	+	5786	protein_coding	- && Q9SAH2.1 RecName: Full=Pentatricopeptide repeat-containing protein At1g80880, mitochondrial; Flags: Precursor	-
Solyc03g032190.3	6.53108	27.4232	12.1128	257.583	895.297	177.15	15.3557	443.344	-4.84837	6.2832e-12	1.02392e-10	-	3	4716715	4720458	+	1689	protein_coding	- && P46277.1 RecName: Full=G2/mitotic-specific cyclin-1; AltName: Full=B-like cyclin; AltName: Full=CycMs1	Cyclin_C
Solyc01g058250.2	154.569	192.978	142.326	8.49176	16.14	7.66056	163.291	10.7641	3.92301	6.28389e-12	1.02392e-10	-	1	65849355	65851507	+	1987	protein_coding	- && O24648.1 RecName: Full=Gibberellin 3-beta-dioxygenase 1; AltName: Full=GA 3-oxidase 1; AltName: Full=Gibberellin 3 beta-hydroxylase 1	2OG-FeII_Oxy
Solyc03g115860.3	3445.14	3457.36	3261.38	1099.21	1454.5	992.043	3387.96	1181.92	1.51927	6.3509e-12	1.03411e-10	-	3	66945208	66949536	-	1788	protein_coding	- && O13737.2 RecName: Full=Uncharacterized endoplasmic reticulum membrane protein C16E8.02	-
Solyc01g008620.3	531.194	718.083	408.808	2271.07	2827.35	1759.06	552.695	2285.83	-2.04815	6.4429e-12	1.04836e-10	-	1	2635021	2636761	+	1229	protein_coding	- && Q01412.1 RecName: Full=Glucan endo-1,3-beta-glucosidase A; AltName: Full=(1->3)-beta-glucan endohydrolase A; Short=(1->3)-beta-glucanase A; AltName: Full=Acidic beta-1,3-glucanase; AltName: Full=Beta-1,3-endoglucanase A; Flags: Precursor	Glyco_hydro_17
Solyc06g048620.3	16.3277	14.2195	19.1786	192.48	373.119	142.678	16.5753	236.092	-3.83203	6.69748e-12	1.08902e-10	-	6	31458238	31463318	+	4542	protein_coding	- && Q9LY03.1 RecName: Full=Probable LRR receptor-like serine/threonine-protein kinase IRK; AltName: Full=Inflorescence and root apices receptor-like kinase; Flags: Precursor	Pkinase_Tyr
Solyc04g015520.3	48.9831	56.8778	36.3384	251.922	350.333	327.489	47.3998	309.915	-2.70922	6.91218e-12	1.12314e-10	-	4	5728929	5736257	+	1351	protein_coding	- && -	-
Solyc04g049350.3	14237.8	14790.3	13344.3	6102.74	4437.56	5901.5	14124.1	5480.6	1.36575	7.28776e-12	1.18335e-10	-	4	41468644	41475522	-	1726	protein_coding	- && Q42884.1 RecName: Full=Chorismate synthase 1, chloroplastic; AltName: Full=5-enolpyruvylshikimate-3-phosphate phospholyase 1; Flags: Precursor	-
Solyc02g076670.3	17.4162	34.533	34.3196	666.131	162.35	467.294	28.7563	431.925	-3.90686	7.30286e-12	1.18497e-10	-	2	42386311	42390318	+	1753	protein_coding	- && Q700D9.2 RecName: Full=Putative Myb family transcription factor At1g14600	Myb_DNA-binding
Solyc00g080750.3	95.7891	142.195	175.636	5.66117	8.54472	5.74542	137.873	6.65044	4.37407	7.31788e-12	1.18658e-10	-	SL3.00SC0000707	542	2213	-	977	protein_coding	Plastid movement impaired protein && Q6NLC8.1 RecName: Full=Uncharacterized protein At1g66480	-
Solyc07g045185.1	174.162	166.571	190.777	677.454	602.877	985.34	177.17	755.224	-2.09167	7.36949e-12	1.19411e-10	-	7	58423970	58425380	+	1211	protein_coding	- && Q9LUA9.1 RecName: Full=Zinc finger protein CONSTANS-LIKE 10	CCT
Solyc03g112460.3	0	0	0	68.8776	277.229	116.824	0	154.31	-9.65958	7.3752e-12	1.19421e-10	-	3	64344300	64349425	-	1626	protein_coding	- && Q94A02.1 RecName: Full=Tryptophan aminotransferase-related protein 2	-
Solyc06g035420.1	0	0	0	233.995	53.1671	180.023	0	155.728	-9.67281	7.42366e-12	1.20122e-10	-	6	24395592	24397568	-	990	protein_coding	- && Q9FZ95.1 RecName: Full=Purine permease 3; Short=AtPUP3	-
Solyc02g082260.3	246.004	271.185	182.702	1112.42	3497.64	1167.28	233.297	1925.78	-3.04528	7.44635e-12	1.20405e-10	-	2	46498898	46508848	-	5063	protein_coding	3-hydroxy-3-methylglutaryl coenzyme A reductase [Source:UniProtKB/TrEMBL;Acc:K4BA96] && P48020.1 RecName: Full=3-hydroxy-3-methylglutaryl-coenzyme A reductase 1; Short=HMG-CoA reductase 1; Short=HMGR; Short=HMGR1	-
Solyc10g076243.1	1.08851	0	0	514.223	157.603	106.29	0.362838	259.372	-9.44704	7.46948e-12	1.20695e-10	-	10	59223002	59224460	+	1308	protein_coding	- && A5H452.1 RecName: Full=Peroxidase 70; AltName: Full=Plasma membrane-bound peroxidase 2b; Short=pmPOX2b; Flags: Precursor	-
Solyc10g086335.1	471.326	572.841	566.274	101.901	131.968	67.9875	536.814	100.619	2.41548	7.50952e-12	1.21258e-10	-	10	65317176	65330479	+	8049	protein_coding	Kinesin-like protein KIN-5B [Source:Projected from Arabidopsis thaliana (AT2G37420) UniProtKB/Swiss-Prot;Acc:Q0WQJ7] && Q0WQJ7.1 RecName: Full=Kinesin-like protein KIN-5B; AltName: Full=AtKRP125a	Kinesin
Solyc11g071990.2	117.559	138.132	87.8179	845.402	480.403	560.179	114.503	628.661	-2.45707	7.78916e-12	1.25686e-10	-	11	55585960	55588840	+	1572	protein_coding	- && Q54NS8.1 RecName: Full=Apoptosis-inducing factor homolog B	Pyr_redox_2
Solyc09g097865.1	0	0	0	151.908	250.645	57.4542	0	153.336	-9.65049	7.84975e-12	1.26576e-10	-	9	72352100	72357682	+	3472	protein_coding	- && Q8L7Y8.1 RecName: Full=Kinesin-like protein KIN-12B; AltName: Full=Phragmoplast-associated kinesin-related protein 1-like protein; Short=AtPAKRP1L	-
Solyc11g069220.2	68.5763	22.3449	5.04701	1236.02	868.713	405.052	31.9894	836.596	-4.71261	7.89167e-12	1.27164e-10	-	11	54149209	54157739	+	2728	protein_coding	MLO-like protein [Source:UniProtKB/TrEMBL;Acc:K4DA78] && Q94KB7.2 RecName: Full=MLO-like protein 6; Short=AtMlo6	-
Solyc01g005630.2	0	0	0	150.021	155.704	75.648	0	127.124	-9.38005	7.9539e-12	1.28078e-10	-	1	444811	445619	+	678	protein_coding	Ethylene-responsive transcription factor RAP2-11 [Source:Projected from Arabidopsis thaliana (AT5G19790) UniProtKB/Swiss-Prot;Acc:Q6J9S1] && Q6J9S1.1 RecName: Full=Ethylene-responsive transcription factor RAP2-11; AltName: Full=Protein RELATED TO APETALA2 11	AP2
Solyc12g040860.2	101.232	155.398	90.8461	0	0	0	115.825	0	9.37234	8.03375e-12	1.29274e-10	-	12	56344873	56346927	-	1588	protein_coding	- && Q8VYE5.1 RecName: Full=Glucan endo-1,3-beta-glucosidase 12; AltName: Full=(1->3)-beta-glucan endohydrolase 12; Short=(1->3)-beta-glucanase 12; AltName: Full=Beta-1,3-endoglucanase 12; Short=Beta-1,3-glucanase 12; Flags: Precursor	Glyco_hydro_17
Solyc01g100120.3	0	0	0	126.433	202.225	73.7329	0	134.13	-9.45743	8.21504e-12	1.321e-10	-	1	90085715	90095959	-	6762	protein_coding	- && O81635.2 RecName: Full=Kinesin-like protein KIN-14G; AltName: Full=Kinesin-like protein KatD	Kinesin
Solyc03g082550.3	843.598	734.333	785.314	72.6517	51.2683	168.532	787.748	97.4841	3.01473	8.2869e-12	1.33163e-10	-	3	53920814	53922072	+	1158	protein_coding	- && Q9M276.1 RecName: Full=Homeobox-leucine zipper protein ATHB-12; AltName: Full=HD-ZIP protein ATHB-12; AltName: Full=Homeodomain transcription factor ATHB-12	Homeobox
Solyc11g030475.1	59.8682	32.5016	73.6863	1024.67	331.345	474.955	55.352	610.324	-3.46306	8.29819e-12	1.33252e-10	-	11	21980400	21987017	+	378	protein_coding	- && -	-
Solyc07g054745.1	118.648	72.113	181.692	0	0	0	124.151	0	9.47246	8.49615e-12	1.36337e-10	-	7	63097594	63097887	-	228	protein_coding	- && -	-
Solyc08g080890.3	153.48	80.2384	89.8367	619.898	615.22	512.3	107.852	582.473	-2.43464	8.55504e-12	1.37187e-10	-	8	64170636	64189332	+	5582	protein_coding	Heavy metal P-type ATPase, Xylem loading of coppe [Source: Projected from Oryza sativa (Os04g0556000)] && Q9SH30.2 RecName: Full=Probable copper-transporting ATPase HMA5; AltName: Full=Probable copper-transporting ATPase 3; AltName: Full=Protein HEAVY METAL ATPASE 5	E1-E2_ATPase
Solyc06g005610.1	0	0	0	71.7082	338.941	95.757	0	168.802	-9.78909	8.57695e-12	1.37444e-10	-	6	671396	671725	+	330	protein_coding	- && -	-
Solyc02g088325.1	15.2392	22.3449	38.3573	195.31	333.244	303.55	25.3138	277.368	-3.45078	8.62576e-12	1.38131e-10	-	2	51092552	51096178	+	1753	protein_coding	- && -	-
Solyc08g065430.3	5.44257	35.5486	21.1974	555.738	326.598	253.756	20.7295	378.698	-4.18711	8.73434e-12	1.39773e-10	-	8	53501858	53507696	-	1298	protein_coding	Protein NDL2 [Source:Projected from Arabidopsis thaliana (AT5G11790) UniProtKB/Swiss-Prot;Acc:Q9ASU8] && O23969.1 RecName: Full=Pollen-specific protein SF21	Ndr
Solyc10g006450.3	136.064	132.038	155.448	10.3788	4.74707	2.87271	141.183	5.99953	4.55489	8.78127e-12	1.40428e-10	-	10	1049196	1052879	-	3286	protein_coding	- && Q9LJU0.1 RecName: Full=COBRA-like protein 10; Flags: Precursor	-
Solyc04g015020.3	5024.58	5341.44	5348.82	2337.12	1810.53	1611.59	5238.28	1919.75	1.44816	8.91422e-12	1.42456e-10	-	4	5226834	5228903	-	1339	protein_coding	- && -	-
Solyc06g084540.3	1810.2	1605.78	1773.52	493.466	594.333	689.45	1729.83	592.416	1.54597	9.2021e-12	1.46956e-10	-	6	49674412	49675459	+	780	protein_coding	- && -	Usp
Solyc08g079980.1	53.3371	19.2978	46.4325	1196.39	263.937	466.337	39.6891	642.223	-4.01738	9.46639e-12	1.51072e-10	-	8	63481601	63483871	+	2271	protein_coding	- && O65351.1 RecName: Full=Subtilisin-like protease SBT1.7; AltName: Full=Cucumisin-like serine protease; AltName: Full=Subtilase subfamily 1 member 7; Short=AtSBT1.7; AltName: Full=Subtilisin-like serine protease 1; Short=At-SLP1; Flags: Precursor	Peptidase_S8
Solyc06g070980.3	1046.06	1132.48	1437.39	373.637	248.746	352.386	1205.31	324.923	1.89131	9.61766e-12	1.53381e-10	-	6	43728360	43734202	-	1167	protein_coding	UBC1 [Source:UniProtKB/TrEMBL;Acc:K4C8H1] && P42745.1 RecName: Full=Ubiquitin-conjugating enzyme E2 2; AltName: Full=E2 ubiquitin-conjugating enzyme 2; AltName: Full=Ubiquitin carrier protein 2; AltName: Full=Ubiquitin-conjugating enzyme E2-17 kDa 2; AltName: Full=Ubiquitin-protein ligase 2	UQ_con
Solyc01g079180.3	0	0	0	73.5952	130.07	181.938	0	128.534	-9.39586	9.80787e-12	1.56307e-10	-	1	78137369	78139943	+	1470	protein_coding	Pectinesterase [Source:UniProtKB/TrEMBL;Acc:K4AXG4] && Q8VYZ3.1 RecName: Full=Probable pectinesterase 53; Short=PE 53; AltName: Full=Pectin methylesterase 53; Short=AtPME53; Flags: Precursor	-
Solyc05g008440.2	2050.76	1979.55	1981.45	6171.62	5450.58	10398.3	2003.92	7340.15	-1.87299	1.0163e-11	1.61856e-10	-	5	2793730	2798560	+	985	protein_coding	- && -	-
Solyc03g118900.2	0	0	0	113.223	294.318	63.1996	0	156.914	-9.68375	1.06989e-11	1.70274e-10	-	3	69164042	69166078	+	1086	protein_coding	- && Q9LV20.1 RecName: Full=WAT1-related protein At3g18200	DUF6
Solyc03g005630.3	0	0	0	451.007	68.3578	76.6056	0	198.657	-10.0241	1.09666e-11	1.74416e-10	-	3	451133	456308	-	3771	protein_coding	- && -	-
[truncated: 6,074 more rows]

## Sheet: Table S2
Table S2. Cluster analysis of differentially DEGs induced by cis-abienol and water in tomato.
[truncated: 7,537 more rows]

## Sheet: Table S3
Table S3. GO annotation results of the DEGs in tomato at cis-abienol induce.
[truncated: 2,463 more rows]

[truncated: 2 more sheets: Table S4, Table S5]
